# Supplementary material for: Phosphoproteomics guides low dose drug combination of cisplatin and silmitasertib against concurrent chemoradiation resistant cervical cancer
Source: Royal Society of Chemistry journal article supplement (doi:10.1039/d4mo00147h), 2024-11-27
Supplement: d4mo00147h2.xlsx [file d4mo00147h2.xlsx]

## Sheet: S1
Supplementary table 1: Clinicopathological details of patients used for the phosphoproteomics
Patient Id	age	stage	Response
CR3	55	IIIB	COMPLETE RESPONDER
CR7	50	IIIB	COMPLETE RESPONDER
CR20	66	IIIB	COMPLETE RESPONDER
CR41	51	IIIB	COMPLETE RESPONDER
CR42	42	IIIB	COMPLETE RESPONDER
NR21	40	IIIB	NON RESPONDER
NR23	45	IIIB	NON RESPONDER
NR31	42	IIIB	NON RESPONDER
NR37	43	IIIB	NON RESPONDER
NR40	50	IIIB	NON RESPONDER

## Sheet: S2
Supplementary table 2: Identified phosphopepetides in CCRT resistant cervical cancer patients
Confidence	Annotated Sequence	Modifications	Modifications in Master Proteins	Qvality PEP	Qvality q-value	# Protein Groups	# Proteins	# PSMs	Master Protein Accessions	Positions in Master Proteins	# Missed Cleavages	Theo. MH+ [Da]	ptmRS: Best Site Probabilities	Abundances (Grouped): 126	Abundances (Grouped): 127N	Abundances (Grouped): 127C	Abundances (Grouped): 128N	Abundances (Grouped): 128C	Abundances (Grouped): 129N	Abundances (Grouped): 129C	Abundances (Grouped): 130N	Abundances (Grouped): 130C	Abundances (Grouped): 131	Abundances (Grouped) Standard Error [%]: 126	Abundances (Grouped) Standard Error [%]: 127N	Abundances (Grouped) Standard Error [%]: 127C	Abundances (Grouped) Standard Error [%]: 128N	Abundances (Grouped) Standard Error [%]: 128C	Abundances (Grouped) Standard Error [%]: 129N	Abundances (Grouped) Standard Error [%]: 129C	Abundances (Grouped) Standard Error [%]: 130N	Abundances (Grouped) Standard Error [%]: 130C	Abundances (Grouped) Standard Error [%]: 131	Abundances (Normalized): F14: 126, Sample	Abundances (Normalized): F15: 126, Sample	Abundances (Normalized): F16: 126, Sample	Abundances (Normalized): F17: 126, Sample	Abundances (Normalized): F18: 126, Sample	Abundances (Normalized): F19: 126, Sample	Quan Info	XCorr Sequest HT	Confidence Sequest HT	Percolator q-Value Sequest HT	Percolator PEP Sequest HT
High	[K].VQEAQDSDSDSEGGAAGGEADMDFLR.[N]	1xTMT6plex [N-Term]; 1xPhospho [S9(99.6)]	13775600 1xPhospho [S25(100)]	2.36954e-05	0	1	1	9	13775600	13775600 [17-42]	0	2966.22	S9(Phospho): 99.61	177.3	67.9	134.4	137.4	86.8	126.6	172.9	131.1	150.5	124																177.3	Unique	5.85779	High	0	5.457e-06
High	[K].TEEARPSPAPGPGTPTGTPTR.[T]	1xTMT6plex [N-Term]; 1xPhospho [T/S]		0.000339078	0	1	3	7	167614488	167614488 [135-155]	0	2386.16	T14(Phospho): 49.65; T16(Phospho): 49.65	193.4	342.9	111.3	86.8	392.9	142.4	102.9	138.7	175.3	197.3		91.13	87.43	62.73	84.47		103.14		31.25							193.4	Unique	5.65707	High	0	0.0003619
High	[R].ERDHSPTPSVFNSDEER.[Y]	1xTMT6plex [N-Term]; 1xPhospho [S5(98.6)]	530376841 1xPhospho [S501(100)]	0.000173318	0	1	16	10	530376841	530376841 [497-513]	1	2311.02	S5(Phospho): 100	591.3	732.8	1107.7	705.1	647.1	557.4	825.7	704.2	880.3	749.5	15.98	17.79	23.2	7.76	5.01	20.34	7.74	25.83	13.53	14.36				658.1	524.5		Unique	5.50901	High	0	0.0002764
High	[K].VTPQEEADSDVGEEPDSENTPQK.[A]	2xTMT6plex [N-Term; K23]; 1xPhospho [S9(100)]	134133265 1xPhospho [S128(100)]	0.000107678	0	1	2	3	134133265	134133265 [120-142]	0	3039.37	S9(Phospho): 100	680.5	336.3	644.4	599.6	368.6	736.5	502.8	818	1234.8	709.2																680.5	Unique	6.76363	High	0	7.685e-05
High	[K].KPAQEETEETSSQESAEED.[-]	2xTMT6plex [N-Term; K1]; 1xPhospho [S/T]	4504431 1xPhospho [S105(99)]	0.000400268	0	1	1	11	4504431	4504431 [91-109]	0	2662.17	T10(Phospho): 49.8; S11(Phospho): 49.8	55.4	163.9	130.3	128.3	232.6	126.6	432.5	141.8	381.8	101.8															55.4		Unique	3.70838	High	0.0002194	0.0004921
High	[R].QIAERPAEETGPQEEEGETAGEAPVSHHAATER.[T]	1xTMT6plex [N-Term]; 1xPhospho [S26(100)]	530404534 1xPhospho [S2105(100)]	1.14573e-05	0	1	3	7	530404534	530404534 [2080-2112]	0	3822.74	S26(Phospho): 100	206.3	33.5	249.4	94.9	38.8	86.9	99.5	109.3	138.8	143.1	28.89	46.61	59.15	25.7	13.06	25.36	0.93			31.39				248.5	164.2		Unique	6.76207	High	0	1.515e-06
High	[R].ENAAAESGSESSSQEATPEK.[E]	2xTMT6plex [N-Term; K20]; 1xPhospho [S7(100)]	6466466 1xPhospho [S353(100)]	5.78853e-05	0	1	7	28	6466466	6466466 [347-366]	0	2547.15	S7(Phospho): 99.7	1046.4	439.1	762.6	626.3	354.6	663	630.3	598.8	946.9	501.5	3.67	14.42	9.65	14.09	25.8	21.62	9.26	22.06	11.71	13.15				1073.6	1019.2		Unique	5.09508	High	0	2.64e-05
High	[K].SSSISEEKGDSDDEKPR.[K]	3xTMT6plex [N-Term; K8; K15]; 1xPhospho [S11(100)]	259906018 1xPhospho [S216(100)]	9.49845e-05	0	1	7	54	259906018	259906018 [206-222]	1	2633.29	S11(Phospho): 100	4823.6	4229.2	5752.7	5913.2	4929	4608.5	4253.3	6154.9	6429.7	3736.5	110.49	105.66	111.6	107.65	107.12	104.22	108.06	104.37	108.99	104.9				9198.4	9674		Unique	5.99283	High	0	6.236e-05
High	[K].HTGPNSPDTANDGFVR.[L]	1xTMT6plex [N-Term]; 1xPhospho [S6(100)]	74099697 1xPhospho [S104(99.3)]	0.000113169	0	1	7	36	74099697	74099697 [99-114]	0	1993.9	S6(Phospho): 100	3097	2553.4	3804.1	2060.8	3762	3607	2154.5	2806.2	2929.8	2855.1	6.64	2.73	12.74	10.99	7.73	6.32	5.06	12.92	9.51	4.01							Unique	5.37621	High	0	0.0001883
High	[R].METVSNASSSSNPSSPGR.[I]	1xTMT6plex [N-Term]; 1xOxidation [M1(100)]; 1xPhospho [S/T]	1034584020 1xPhospho [S1162(98.9)]	0.000209028	0	1	7	14	1034584020	1034584020 [1152-1169]	0	2119.92	M1(Oxidation): 100; S15(Phospho): 100	78	140.7	114.9	88.1	102.8	96.6	65.2	124.1	126.4	89.1		51.45	38.99	38.42	24.69	59.89	46.54	31.79	32.67	27.55						78	Unique	4.75035	High	0	0.0002076
High	[K].EVAENQQNQSSDPEEEK.[G]	2xTMT6plex [N-Term; K17]; 1xPhospho [S]	1034648755 1xPhospho [S39(100)]	0.000132479	0	1	13	8	1034648755	1034648755 [29-45]	0	2499.13	S11(Phospho): 100	877.9	222.7	201.7	271.2	339.5	283.6	169.6	624.6	460.3	249	17.77	15.66	4.72	26.7	15.6	23.91	37.53	8.24	3.41	1.99				988.2	767.6		Unique	4.88645	High	0	0.000107
High	[K].TIQNSSVSPTSSSSSSSSTGETQTQSSSR.[L]	1xTMT6plex [N-Term]; 1xPhospho [S8(99.2)]	32698730 1xPhospho [S376(99.2)]	2.48501e-05	0	1	2	5	32698730	32698730 [369-397]	0	3201.42	S8(Phospho): 99.52			42.7	47.7	52.8	45.8	42.2	37.7	34.4	53.3			32.68	45.53			34.43										Unique	5.8775	High	0	7.758e-06
High	[R].QRSPSPAPAPAPAAAAGPPTR.[K]	1xTMT6plex [N-Term]; 1xPhospho [S3(100)]	768010386 1xPhospho [S501(100)]	4.17584e-05	0	1	3	3	768010386	768010386 [499-519]	1	2277.17	S3(Phospho): 100	93.7	152.1	119.8	145.6	118.3	89.4	82.5	158.2	208.3	97.7	38.84	55.02	60.64	48.1	72.73	49.69	80.93	36.75	53.43	37.35				67.9	119.4		Unique	6.0769	High	0	1.486e-05
High	[R].EVMESAVGNSSGSGQNEESPR.[K]	1xTMT6plex [N-Term]; 1xOxidation [M3(100)]; 1xPhospho [S19(100)]		0.000102675	0	1	1	6	7662158	7662158 [326-346]	0	2476.05	M3(Oxidation): 100; S19(Phospho): 100	60.2	119.3	28.9	195.5	154.1	158.1	69.3	183.3	158.6	154.1		84.14	8.14	98.77	114.4	97.99	108.63	114.75	86.42	49.48				60.2			Unique	4.7274	High	0	7.118e-05
High	[R].AATAARPPAPPPAPQPPSPTPSPPRPTLAR.[E]	1xTMT6plex [N-Term]; 1xPhospho [S18(96.4)]	400153980 1xPhospho [S108(99)]	5.24039e-05	0	1	2	55	400153980	400153980 [91-120]	0	3273.75	S22(Phospho): 100	2709.2	2345.4	1957.9	3055.4	1693.2	2622.5	1239.2	3884.4	2058.8	1839.9	21.03	10.73	7.9	5.46	11.34	6.2	4.95	6.93	6.28	14.69							Unique	6.64191	High	0	8.544e-05
High	[R].SPRPQQDPARPQEPTMPPPETPSEGR.[Q]	1xTMT6plex [N-Term]; 1xOxidation [M16(100)]; 1xPhospho [S1(100)]	15451779 1xPhospho [S8(100)]; 67089157 1xPhospho [S8(100)]	0.000331765	0	2	9	6	15451779; 67089157	15451779 [8-33]; 67089157 [8-33]	0	3207.51	S1(Phospho): 100; M16(Oxidation): 100	56.1	175.2	79	71.8	72.5	157.1	53.2	88	97.5	84.9	4.77	44.82	14.09	16.84	21.18	28.26	17.22	29.56	21.7	13.16				56.3	53.3	58.6	Not Unique	5.18208	High	0	0.0003545
High	[R].SPRPQQDPARPQEPTMPPPETPSEGR.[Q]	1xTMT6plex [N-Term]; 1xPhospho [S1(100)]	15451779 1xPhospho [S8(100)]; 67089157 1xPhospho [S8(100)]	0.000210319	0	2	9	1	15451779; 67089157	15451779 [8-33]; 67089157 [8-33]	0	3191.51	S1(Phospho): 100	100.3	148.2	169.3	126.3	128.3	179.6	109.7	126.9	181.6	132.1																100.3	Not Unique	5.77768	High	0	0.0002094
High	[K].QSQIQNQQGEDSGSDPEDTY.[-]	1xTMT6plex [N-Term]; 1xPhospho [S/T/Y]	4557719 1xPhospho [T918(98.9)]	0.000276982	0	1	6	46	4557719	4557719 [900-919]	0	2535.04	T19(Phospho): 99.07	508.6	380.1	442.9	619.2	448.4	568.2	426	668.3	782.5	546.8	15.13	0.59	2.62	4	10.35	4.18	1.46	1.49	3.37	12.54				563	454.2		Unique	3.73313	High	0	0.0003857
High	[K].KAASVEEGDEGQDSPGGQSR.[G]	2xTMT6plex [N-Term; K1]; 1xPhospho [S4(100)]	1034563506 1xPhospho [S690(100)]	0.000193648	0	1	9	3	1034563506	1034563506 [687-706]	1	2542.18	S4(Phospho): 100	88.1	152.6	278.8	320.6	52.4	203.3	63.7	62.3	101.4	324.8	60.43	1.95	1.14	26.8	16.36	17.96	18.6	11.5	13.46	5.45				50.5	125.8		Unique	5.39177	High	0	0.0002255
High	[K].SQNSQESTADESEDDMSSQASK.[S]	2xTMT6plex [N-Term; K22]; 1xPhospho [S/T]	21361861 1xPhospho [S1412(100)]	6.14988e-05	0	1	2	1	21361861	21361861 [1401-1422]	0	2899.22	S12(Phospho): 100	254.4	88.4	165.6	245.1	126	162	168.6	228.9	181.3	206.3																254.4	Unique	5.22961	High	0	2.946e-05
High	[R].SDREETESSEGEEAAAGGGAK.[S]	2xTMT6plex [N-Term; K21]; 1xPhospho [T/S]	767909065 1xPhospho [S368(99.7)]	0.000401614	0	1	2	2	767909065	767909065 [361-381]	1	2605.17	S8(Phospho): 99.74	539.7	50.7	31.6	113.1	105.5	62	79.2	226.4	42.4	39.7														539.7			Unique	4.34834	High	0	0.0004148
High	[K].HSLDSDEEEDDDDGGSSK.[Y]	2xTMT6plex [N-Term; K18]; 1xPhospho [S5(100)]	5174409 1xPhospho [S49(100)]	0.000199351	0	1	1	8	5174409	5174409 [45-62]	0	2475.01	S5(Phospho): 100	681.7	686.1	861.1	573.5	369.9	607.1	405.2	735.9	754.9	752.6	3.67	10.17	4.69	9.86	0.54	1.78	5.93	9.65	8.42	11.4				664	699.4		Unique	5.24933	High	0	0.0002112
High	[K].GVHIHQAGGSPPASSTSSSSLTNDVAK.[Q]	2xTMT6plex [N-Term; K27]; 1xPhospho [S10(100)]	22094987 1xPhospho [S877(100)]	0.000194454	0	1	2	6	22094987	22094987 [868-894]	0	3130.56	S10(Phospho): 100	136.7	84.3	180	109.2	87.2	159.6	114.4	149.7	166.8	128.1	11.25	16.37	33.1	6.6	2.31	13.82	32.95	6.12	36.37	6.48				147.5	125.8		Unique	4.19074	High	0	0.0001885
High	[K].GTMDDISQEEGSSQGEDSVSGSQR.[I]	1xTMT6plex [N-Term]; 1xPhospho [S/T]		2.72719e-05	0	1	2	9	30581135	30581135 [945-968]	0	2795.15	S13(Phospho): 100	52.2	36.3	21.3	69.5	59	64	48.9	59.2	67.4	74.2																	Unique	5.31606	High	0	7.011e-06
High	[R].GSSQPNLSTSHSEQEYGK.[A]	2xTMT6plex [N-Term; K18]; 1xPhospho [S/T/Y]	156671217 1xPhospho [S173(99.8)]	0.000339078	0	1	2	8	156671217	156671217 [171-188]	0	2474.16	S3(Phospho): 99.79	521.1	247.5	296.4	281.2	142.2	447.7	325.6	196	360.1	229	1.37	3.59	5.7	16.16	15.81	10.26	2.34	9.74	3.14	12.01				526.1	516		Unique	5.51611	High	0	0.0003614
High	[K].GGSEGQPESSTASNSVVPPPQGGSGR.[G]	1xTMT6plex [N-Term]; 1xPhospho [S3(100)]	112734870 1xPhospho [S438(100)]	1.78881e-05	0	1	4	3	112734870	112734870 [436-461]	0	2735.25	S3(Phospho): 100	164.3	133.7	122.8	132.8	156	173.2	96	130.6	166.5	151.9	64.55	112.98	84.43	93.44	107.25	68.8	109.11	54.09	52.75	54.83				89.3		239.3	Unique	6.88232	High	0	3.331e-06
High	[K].APVQPQQSPAAAPGGTDEKPSGK.[E]	3xTMT6plex [N-Term; K19; K23]; 1xPhospho [S8(100)]	25777602 1xPhospho [S16(100)]	5.62805e-05	0	1	1	15	25777602	25777602 [9-31]	0	2985.56	S8(Phospho): 100	1551.9	1097.3	703.8	1105.8	893.6	1254	1119	1025.7	1381.8	1225.5	8.2	3.43	35.19	34.12	42.31	6.58	5.17	40.66	7.61	3.54				1461.9	1641.8		Unique	5.33428	High	0	2.52e-05
High	[R].NMGGPYGGGNYGPGGSGGSGGYGGR.[S]	1xTMT6plex [N-Term]; 1xPhospho [S19(100)]	530384720 1xPhospho [S344(100)]	2.05435e-05	0	1	2	4	530384720	530384720 [326-350]	0	2499.03	S19(Phospho): 100	79.8	71.2	139.2	66.2	119	74.4	106.8	62	104.9	83.4	21.03	5.65	0.24	13.02	42.86	43.99	45.41	6.95	28.52	15.2				67.9	91.7		Unique	5.54606	High	0	4.245e-06
High	[K].EMAHGSQEAEAPGAVAGAAEVPR.[E]	1xTMT6plex [N-Term]; 1xOxidation [M2(100)]; 1xPhospho [S6(100)]	122939165 1xPhospho [S146(100)]	0.000301253	0	1	3	2	122939165	122939165 [141-163]	0	2560.17	M2(Oxidation): 100; S6(Phospho): 100		58.1	64.2	80.4	76.5	86.3	82.4	76.8	123.9	124.5		12.45	23.25	4.8	22.32	11.13	30.06	7.06	3.91	0.51							Unique	4.51148	High	0	0.0004175
High	[K].EMAHGSQEAEAPGAVAGAAEVPR.[E]	1xTMT6plex [N-Term]; 1xPhospho [S6(100)]	122939165 1xPhospho [S146(100)]	5.1505e-05	0	1	3	1	122939165	122939165 [141-163]	0	2544.18	S6(Phospho): 100	123.9	124.6	108	133.1	106.6	108.3	149.8	92.6	114.7	120.6																123.9	Unique	5.71289	High	0	2.154e-05
High	[K].LTLSGSDSVILGDTTTSGASDEEDGQPR.[R]	1xTMT6plex [N-Term]; 1xPhospho [S4(100)]	39812106 1xPhospho [S367(100)]	3.13881e-05	0	1	2	3	39812106	39812106 [364-391]	0	3117.43	S4(Phospho): 100	119.7	73.4	85.2	58.7	72.1	73.5	65.4	68.6	84	112.7																119.7	Unique	7.33745	High	0	1.124e-05
High	[R].RGSGHPAYAEVEPVGEK.[E]	2xTMT6plex [N-Term; K17]; 1xPhospho [S3(100)]	40255005 1xPhospho [S506(100)]	0.000233284	0	1	2	11	40255005	40255005 [504-520]	1	2321.17	S3(Phospho): 100	551.6	687	476.4	590.5	430.2	1112.6	978.4	677.1	670.6	902.5	20.96	3.73	9.19	1.46	6.05	9.49	1.61	1.26	2.74	8.02				469.8	633.3		Unique	4.58593	High	0	0.0002394
High	[R].VSDSESEGPQKGPASDSETEDASR.[H]	2xTMT6plex [N-Term; K11]; 1xPhospho [S15(100)]	530369278 1xPhospho [S318(99.5)]	0.000210319	0	1	7	7	530369278	530369278 [304-327]	1	3003.35	S15(Phospho): 100	229.4	966.9	404.9	611.2	499.4	569.3	312.9	721.8	903.2	339																229.4	Unique	4.93034	High	0	0.0002132
High	[R].IQAAASTPTNATAASDANTGDR.[G]	1xTMT6plex [N-Term]; 1xPhospho [T7(99.3)]	21361340 1xPhospho [T403(99.6)]	0.000140997	0	1	2	4	21361340	21361340 [397-418]	0	2413.12	T7(Phospho): 99.57	83.4	76.6	92	84.4	65.9	102.6	99.9	51.1	134.6	118.5	32.99	3.2	31.68	7.79	11.99	16.97	21.92	17.06	11.62	2.1				102.9	64		Unique	4.68985	High	0	0.0001181
High	[K].GTMDDISQEEGSSQGEDSVSGSQR.[I]	1xTMT6plex [N-Term]; 1xOxidation [M3(100)]; 1xPhospho [S/T]	30581135 1xPhospho [S966(99.2)]	0.000174416	0	1	2	14	30581135	30581135 [945-968]	0	2811.15	M3(Oxidation): 100; S13(Phospho): 99.51		25.3	28.2	100.6	42	156.2	62		245.1	164.5		34.52	27.64	76.69	33	114.58	83.18		108.54	120.85							Unique	3.83003	High	0	0.000162
High	[K].TPSPKEEDEEPESPPEK.[K]	3xTMT6plex [N-Term; K5; K17]; 1xPhospho [S13(100)]	56118310 1xPhospho [S214(100)]	0.000335409	0	1	2	18	56118310	56118310 [202-218]	1	2692.32	S13(Phospho): 100	2173.9	1965.7	3899.9	3563	1047.9	2859.2	1909.8	3864	2823.9	2017.7	21.57	20.07	28.48	24.21	15.78	21.07	23.81	25.51	23.56	20.17				1842.4	2505.4		Unique	4.63315	High	0.0002194	0.0004833
High	[K].KKASSSDSEDSSEEEEEVQGPPAK.[K]	4xTMT6plex [N-Term; K1; K2; K24]; 1xPhospho [S4(99.5)]	530394600 1xPhospho [S84(99.5)]	6.31157e-05	0	1	4	30	530394600	530394600 [81-104]	2	3546.75	S4(Phospho): 99.06	116.7	573.7	175	313.4	376.6	364.2	205.1	386.7	344.8	234.7	82.01	70.06	75.48	77.2	62.04	74.76	78.93	87	69.78	68.59				184.4	49		Unique	7.26253	High	0	3.163e-05
High	[R].GAVAAEGASDTEREEPTESQGLAAR.[L]	1xTMT6plex [N-Term]; 1xPhospho [S9(100)]	557440888 1xPhospho [S915(100)]	0.000326946	0	1	8	9	557440888	557440888 [907-931]	1	2811.3	S9(Phospho): 100	289.9	207.8	229.1	347.6	344.4	342.6	194.5	393.7	371.3	281.8	45.78	9.18	34.87	14.76	39.65	34.57	1.43	25.5	33.96	12.59				196.1	383.8		Unique	4.19038	High	9.533e-05	0.000469
High	[R].SRLTPVSPESSSTEEK.[S]	2xTMT6plex [N-Term; K16]; 1xPhospho [T4(100)]	4505571 1xPhospho [T269(100)]	0.000400268	0	1	2	5	4505571	4505571 [266-281]	1	2272.15	T4(Phospho): 99.74	80.3	161	97.6	89	587.4	141.2	163.2	111	228.1	137.6	16.8	49.54	5.66	30.9	64.79	19.53	70.27	9.58	56.76	20.88				67.9			Unique	4.87369	High	0	0.0004138
High	[K].TGVTSTSDSEEEGDDQEGEK.[K]	2xTMT6plex [N-Term; K20]; 1xPhospho [T6(99.1)]	19923653 1xPhospho [S271(98.9)]	0.0001579	0	1	4	48	19923653	19923653 [267-286]	0	2638.13	S9(Phospho): 100	752.1	1492.7	655.3	1458.4	3714	1133	866	2793	2934.7	464.5	96.42	81.01	65.3	85.49	91.58	81.3	73.89	83.74	88.2	73.75				81.5		653.1	Unique	5.52097	High	0	0.0003865
High	[K].SKEDVTVSPSQEINAPPDENKR.[T]	3xTMT6plex [N-Term; K2; K21]; 1xPhospho [S8(99.7)]	1034649102 1xPhospho [S852(100)]	0.000433129	0	1	1	3	1034649102	1034649102 [845-866]	2	3207.65	S8(Phospho): 100	346.2	75.5	264.9	144.2	156.6	176.5	643.4	113.7	167.3	362.4	61.25	16.54	66.55	61.24	51.16	50.1	48.47	18.73	64.49	35.84							Unique	4.18099	High	0	0.0004351
High	[R].VEGGSGGFSSASSFDESEDDVVAGGGGASDPEDR.[S]	1xTMT6plex [N-Term]; 1xPhospho [S29(100)]	18643383 1xPhospho [S378(100)]	2.28895e-05	0	1	2	2	18643383	18643383 [350-383]	0	3542.46	S29(Phospho): 100	107.4	73.6	84.9	71.7	74.4	95.2	74.7	77.7	81.7	85.7																107.4	Unique	4.97328	High	0	5.145e-06
High	[R].TTPPPGRPPAPSSEEEDGEAVAH.[-]	1xTMT6plex [N-Term]; 1xPhospho [T2(99.4)]	1034659316 1xPhospho [T289(99.2)]	0.000360326	0	1	2	18	1034659316	1034659316 [288-310]	0	2637.2	T2(Phospho): 99.34	483.2	337.9	919.6	486.3	999.7	1392.2	593.5	481.2	901.7	519.3	22.22	20.26	4.42	5.32	1.99	4.27	4.5	7.33	15.98	0.58				559.1	407.3		Unique	4.80724	High	0	0.0003816
High	[R].AKTQTPPVSPAPQPTEER.[L]	2xTMT6plex [N-Term; K2]; 1xPhospho [T5(99.6)]	20357552 1xPhospho [T401(100)]	7.53624e-05	0	1	4	13	20357552	20357552 [397-414]	1	2472.29	T5(Phospho): 100	684.6	2603	1074.3	1363.9	1175.2	1377.9	1602	826.2	1567.4	1161.9	3.06	6.63	0.88	0.88	11.43	2.24	0.8	4.69	9.25	11.03				669.8	699.4		Unique	6.26781	High	0	4.2e-05
High	[R].SSGSPYGGGYGSGGGSGGYGSR.[R]	1xTMT6plex [N-Term]; 1xPhospho [S/Y]	34740329 1xPhospho [S358(100)]	9.91182e-06	0	1	3	32	34740329	34740329 [355-376]	0	2219.92	S4(Phospho): 100	214.6	247.2	1429.4	301.7	927.3	263.7	931.6	542.1	1604	837.2	39.99	31.26	73.79	53.34	64.51	48.24	69.45	65.64	80.63	57.87				246.6	339	219	Unique	6.43764	High	0	1.176e-06
High	[K].QEKPAEKPAETPVATSPTATDSTSGDSSR.[S]	3xTMT6plex [N-Term; K3; K7]; 1xPhospho [T/S]		4.01378e-06	0	1	3	52	4506387	4506387 [145-173]	0	3712.85	S16(Phospho): 99.66	2728.2	3296.4	6516.8	4335.6	2016.6	4006	5942.9	3180.8	2334.3	5334.2	64.47	68.96	65.48	60.41	81.73	67.42	48.38	76.31	57.68	50.95							Unique	7.53328	High	0	2.38e-07
High	[K].GVDEQSDSSEESEEEKPPEEDKEEEEEK.[K]	4xTMT6plex [N-Term; K16; K22; K28]; 1xPhospho [S]		4.06886e-05	0	1	1	4	156104891	156104891 [300-327]	1	4248.94	S6(Phospho): 25; S8(Phospho): 25; S9(Phospho): 25; S12(Phospho): 25	123.1	74.3	89.6	266.3	137.3	236.6	99.9	276.3	163.3	171.8	3.12	2.61	43.01	52.65	14.88	10.08	24.75	26.44	46.32	58.7				120.4	125.8		Unique	6.05289	High	0	2.197e-05
High	[R].LQQGAGLESPQGQPEPGAASPQR.[Q]	1xTMT6plex [N-Term]; 1xPhospho [S20(100)]	13129104 1xPhospho [S91(100)]	2.02216e-06	0	1	1	6	13129104	13129104 [72-94]	0	2612.27	S20(Phospho): 100	785.8	483.8	660.8	920.8	439.5	958.4	406.1	683.7	726.7	687.5	8.28	28.29	16.82	8.44	24.18	7.26	4.78	21.71	2.71	11.84							Unique	7.60078	High	0	7.099e-08
High	[R].ESVSTASDQPSHSLER.[Q]	1xTMT6plex [N-Term]; 1xPhospho [S7(99.2)]	21361831 1xPhospho [S973(100)]	9.79043e-05	0	1	30	7	21361831	21361831 [961-976]	0	2038.93	S13(Phospho): 100	110.4	288.8	188.8	160.8	184.8	327.9	128.9	218.3	311.2	261.5	64.96	9.02	11.36	16.21	38.17	27.2	23.93	20.45	21.2	35.66				161.1	59.7		Unique	5.56027	High	0	6.573e-05
High	[R].YDEGSGGSGDEGRDEAHKR.[E]	2xTMT6plex [N-Term; K18]; 2xPhospho [S5(100); S8(100)]	530413160 2xPhospho [S488(100); S491(100)]	0.00038429	0	1	7	3	530413160	530413160 [484-502]	2	2640.11	S5(Phospho): 100; S8(Phospho): 100	549.1	262.6	158.8	164.9	179.4	208.8	131.5	464.7	197.9	278.8																549.1	Unique	5.70423	High	0	0.000402
High	[K].SSSSPELQTLQDILGDPGDK.[A]	2xTMT6plex [N-Term; K20]; 1xPhospho [S3(99.4)]	1034595817 1xPhospho [S1459(99.4)]	0.00012365	0	1	18	4	1034595817	1034595817 [1457-1476]	0	2625.31	S3(Phospho): 99.35	469.3	598.2	496.2	372.9	258	292	301.9	193.3	468.8	385.1													469.3				Unique	5.8047	High	0	9.627e-05
High	[R].LDSPPPSPITEASEAAEAAEAGNLAVSSR.[E]	1xTMT6plex [N-Term]; 1xPhospho [S3(100)]	110556636 1xPhospho [S494(100)]	2.10837e-05	0	1	2	1	110556636	110556636 [492-520]	0	3146.51	S3(Phospho): 100	265.2	83.7	136.1	172.8	103.4	125.4	116.4	180.9	206.3	173													265.2				Unique	6.8341	High	0	4.449e-06
High	[K].LEPVSPPSPPHTDPELELVPPR.[L]	1xTMT6plex [N-Term]; 2xPhospho [S5(100); S8(100)]	331284178 2xPhospho [S149(100); S152(100)]	0.000130217	0	1	3	4	331284178	331284178 [145-166]	0	2792.35	S5(Phospho): 100; S8(Phospho): 100	658	1466.3	1319.1	1303.2	1165.8	1694.6	675.7	1353.5	2105.6	1628.8	56.72	98.39	77.35	84.8	81.15	82.25	75.56	89.72	83.78	79.83				266			Unique	5.9937	High	0	0.0001042
High	[K].EGITGPPADSSKPIGPDDAIDALSSDFTCGSPTAAGK.[K]	3xTMT6plex [N-Term; K12; K37]; 1xCarbamidomethyl [C29]; 1xPhospho [S31(100)]	578810573 1xPhospho [S326(100)]; 578810575 1xPhospho [S326(100)]	1.41222e-06	0	2	25	2	578810573; 578810575	578810573 [296-332]; 578810575 [296-332]	0	4370.14	S31(Phospho): 100	1458.5	232	1170.7	607.3	670.7	377.6	533.7	231.9	381.3	531.6													1458.5				Not Unique	8.61832	High	0	3.771e-08
High	[R].ETDEAAFEPDYNESDSESNVSVKEEESSGNISK.[D]	3xTMT6plex [N-Term; K23; K33]; 1xPhospho [S/Y/T]		0.000123384	0	1	2	9	33620769	33620769 [1631-1663]	1	4389.99	S16(Phospho): 49.88; S18(Phospho): 49.88	173.1	134.9	172.2	266.6	113.3	187.7	156.8	168.8	364.2	128.2																173.1	Unique	4.54144	High	0	9.59e-05
High	[K].ANLSSDEDGSSDDEPEEGK.[K]	2xTMT6plex [N-Term; K19]; 1xPhospho [S]	530788276 1xPhospho [S1285(99.8)]	0.000420675	0	1	21	6	530788276	530788276 [1282-1300]	0	2519.07	S4(Phospho): 99.75	76.1	70.7	96.6	95.9	143.7	153.3	79.4	184.1	174.6	103.6	14.95	7.5	7.44	19.92	29.98	34.72	5.12	27.76	55.96	28.03				79.6	85.3	63.4	Unique	3.72012	High	0.0003683	0.000669
High	[K].AEENAEGGESALGPDGEPIDESSQMSDLPVK.[V]	2xTMT6plex [N-Term; K31]; 1xPhospho [S26(100)]	48255900 1xPhospho [S591(100)]	8.65497e-05	0	1	3	4	48255900	48255900 [566-596]	0	3696.69	S26(Phospho): 100	111.1	82.9	211.4	128.2	74.1	180.6	94	139.9	201	143.1																111.1	Unique	4.49374	High	0	5.335e-05
High	[K].KSPSDVKPLPSPDTDVPLSSVEIENPETSDQ.[-]	3xTMT6plex [N-Term; K1; K7]; 1xPhospho [S/T]	298286506 1xPhospho [S130(99.2)]	0.000432434	0	1	4	14	298286506	298286506 [120-150]	1	4075.06	S19(Phospho): 50; S20(Phospho): 50	197.4	155.2	601.1	125	179	194	107.2	165	175.5	122.9	111.76	98.28	109.57	108.28	123.6	116.16	101.29	102.58	108.83	74.44						37.4	Unique	4.23374	High	0	0.0004351
High	[R].AASPPASASDLIEQQQK.[R]	2xTMT6plex [N-Term; K17]; 1xPhospho [S3(100)]	56790935 1xPhospho [S335(100)]	1.88819e-05	0	1	5	15	56790935	56790935 [333-349]	0	2279.17	S3(Phospho): 100	3010.6	2939.7	3230.4	3685.2	3507	4478.8	2494.7	4908.4	3568.7	2742.5	6.13	8.83	8.12	5.66	7.58	7.68	6.37	8.1	16.32	19.23							Unique	7.22587	High	0	3.664e-06
High	[R].TQPSSGVDSAVGTLPATSPQSTSVQAK.[G]	2xTMT6plex [N-Term; K27]; 1xPhospho [T/S]		0.000147168	0	1	10	25	530380671	530380671 [1094-1120]	0	3139.59	T13(Phospho): 33.33; T17(Phospho): 33.33; S18(Phospho): 33.33		187.1	185.1	402.2		226.3	133.1			260.8				59.55													Unique	4.52043	High	0	0.0001259
High	[K].AEGHSDDESDSEGSDSESTSR.[E]	1xTMT6plex [N-Term]; 1xPhospho [S/T]		1.4316e-05	0	1	5	30	15011880	15011880 [296-316]	0	2492.94	S11(Phospho): 99.34	447.2	610.4	1706.4	236.6	380.6	594.5	199.1	193.5	572.5		78.67	80.83	62.16	44.34	58.5	90.16			46.55								Unique	5.70414	High	0	3.514e-06
High	[K].AQSVSPVQAPPPGGSAQLLPGK.[V]	2xTMT6plex [N-Term; K22]; 1xPhospho [S]	768007571 1xPhospho [S1813(100)]	0.000400941	0	1	12	11	768007571	768007571 [1809-1830]	0	2624.42	S5(Phospho): 100	799.5	1027.1	1034.4	748.6	964.6	817.3	482.3	829.9	875	613.8	72.54	39.26	55.97	37.72	38.53	37.56	30.23	22.52	35.97	28.24							Unique	3.89268	High	0	0.0004146
High	[K].QKFNDSEGDDTEETEDYR.[Q]	2xTMT6plex [N-Term; K2]; 1xPhospho [S6(100)]	7661958 1xPhospho [S397(100)]	0.000176632	0	1	4	5	7661958	7661958 [392-409]	1	2716.17	S6(Phospho): 100	800.5	116.2	1190.6	1237.1	483.1	290.2	1000.4	1105.8	775	415.5	52.59	47.94	46.78	54.45	49.84	50.75	50	39.91	51.43	54.05				502.8	1098.1		Unique	5.14922	High	0	0.0001648
High	[K].TEIKEEEDQPSTSATQSSPAPGQSK.[K]	3xTMT6plex [N-Term; K4; K25]; 1xPhospho [T/S]	50345997 1xPhospho [T1032(99.3)]	3.75351e-06	0	1	2	35	50345997	50345997 [1021-1045]	1	3399.68	S17(Phospho): 50; S18(Phospho): 50	268	562.2	466.9	572.2	570.7	666.6	355.5	465	696.7	309.9	49.15	60.85	64.19	54.28	45.38	47.9	46.4	45.36	43.9	24.94				361.1	174.8		Unique	7.31415	High	0	2.118e-07
High	[R].GLNTSQESDDDILDESSSPEGTQK.[V]	2xTMT6plex [N-Term; K24]; 2xPhospho [S17(93.1); S18(93.1)]	1034557776 2xPhospho [S247(99.4); S257(100)]	0.000159927	0	1	2	6	1034557776	1034557776 [240-263]	0	3170.37	S5(Phospho): 99.38; S8(Phospho): 100	833.3	270.3	747.8	776.2	389.8	384.4	367.5	370.9	549.4	493																833.3	Unique	6.11761	High	0	0.0001426
High	[R].GLNTSQESDDDILDESSSPEGTQK.[V]	2xTMT6plex [N-Term; K24]; 1xPhospho [S8(99.6)]		0.000199351	0	1	2	7	1034557776	1034557776 [240-263]	0	3090.4	T4(Phospho): 50; S5(Phospho): 50	322.2	164.1	308.8	273.3	158	142.2	130	143.6	277.5	167.9	56.87	96.69	94.29	80.87	87.36	98.65	110.11	47.73	60.02	92.37						523.1	Unique	5.92873	High	0	0.0001951
High	[R].SHTSEGAHLDITPNSGAAGNSAGPK.[S]	2xTMT6plex [N-Term; K25]; 1xPhospho [T/S]	767952381 1xPhospho [T383(98.9)]	0.000382316	0	1	5	15	767952381	767952381 [381-405]	0	2914.41	S1(Phospho): 49.9; T3(Phospho): 49.9	441.2	708.3	1777.9	645	1060.9	758.9	753.9	601.9	728.4	871.9																441.2	Unique	5.37156	High	0	0.0004001
High	[R].SPSPPTQHTGQPPGQPSAPSQLSAPR.[R]	1xTMT6plex [N-Term]; 1xPhospho [S3(99.6)]	767988616 1xPhospho [S708(99.6)]	0.000242338	0	1	9	7	767988616	767988616 [706-731]	0	2916.42	S3(Phospho): 99.46	225.6	239.5	343.2	199	313	228	214	260.1	341.4	214.5																225.6	Unique	5.58758	High	0	0.0002512
High	[R].GESDEPAPQVQPESPETVSPK.[G]	2xTMT6plex [N-Term; K21]; 1xPhospho [S14(99.6)]	530367457 1xPhospho [S866(99.6)]	0.000220436	0	1	5	2	530367457	530367457 [853-873]	0	2746.32	S14(Phospho): 100	245.5	337.5	329.6	496	269.3	372	415.1	381.2	388.3	405																245.5	Unique	4.66073	High	0.0002194	0.0005209
High	[R].EDNPEEPSKEITSHEEGGGDVSPR.[K]	2xTMT6plex [N-Term; K9]; 1xPhospho [S22(100)]	24431975 1xPhospho [S273(100)]	7.95491e-05	0	1	1	7	24431975	24431975 [252-275]	1	3133.44	S22(Phospho): 100	289	423.1	409.1	372.6	467.3	580.9	334.9	489.3	683.4	456.1	4.64	11.25	18.44	9.19	18.52	5.23	17.75	8.3	22.04	21.07				279.6	298.5		Unique	5.87466	High	0	4.621e-05
High	[R].SQDATFSPGSEQAEKSPGPIVSR.[T]	2xTMT6plex [N-Term; K15]; 1xPhospho [S/T]	66348045 1xPhospho [S344(100)]	0.000283458	0	1	7	11	66348045	66348045 [329-351]	1	2913.44	S16(Phospho): 100	622.8	1727.1	1677.1	1109.7	444.1	1019.1	800.1	653.7	878.6	892.6	17.15	5.44	13.2	19.83	6.15	10.86	13.46	28.81	0.44	9.95							Unique	4.93544	High	0	0.0003017
High	[K].TNLTSQSSTTNLPGSPGSPGSPGSPGSPGSVPK.[N]	2xTMT6plex [N-Term; K33]; 1xPhospho [S/T]		1.41927e-05	0	1	3	35	530404155	530404155 [754-786]	0	3575.76	S27(Phospho): 99.49	307	286.6	656.1	409.9	218	275.3	231.1	339	341.3	116.6	77.08	7.8	1.93	13.08	1.76	1.18	0.27	6.54	17.11	61.91							Unique	6.11122	High	0	3.516e-06
High	[R].AQSSPASATFPVSVQEPPTKPR.[F]	2xTMT6plex [N-Term; K20]; 1xPhospho [S3(99.7)]	767920742 1xPhospho [S661(99.7)]	0.000152285	0	1	15	16	767920742	767920742 [659-680]	0	2820.47	S3(Phospho): 99.74	825.1	320.7	742.6	560.4	527.3	456.8	432.1	357.3	481.9	576.9	4.91	6.99	0.62	6.28	14.94	0.56	3.89	9.46	16.35	4.1							Unique	4.87046	High	0	0.0002535
High	[R].KADSSSSEEESSSSEEEK.[T]	3xTMT6plex [N-Term; K1; K18]; 1xPhospho [S]	530394600 1xPhospho [S442(100)]	1.38291e-05	0	1	4	31	530394600	530394600 [431-448]	1	2699.24	S13(Phospho): 50; S14(Phospho): 50	79.6	2856.7	293.9	911.1	1791.9	413.2	411.6	832.7	751.3	217.1	24.05	64.4	38.36	62.59	64.51	78.18	43.08	62.98	61.09	46.79				93.2	66.1		Unique	6.2874	High	0	2.11e-06
High	[K].SDGSDTTEQESTNLPSPNK.[S]	2xTMT6plex [N-Term; K19]; 1xPhospho [S/T]	390979647 1xPhospho [S457(100)]	0.000368006	0	1	2	3	390979647	390979647 [442-460]	0	2545.17	S16(Phospho): 100	373.1	332.7	381.8	378.3	252.1	344.5	183	231.5	306.1	276.7	10.55	12.07	34.97	28.2	31.62	1.34	49.63	1.97	31.15	36.13						345.2	Unique	4.95889	High	0	0.0003882
High	[R].GDEASEEGQNGSSPK.[S]	2xTMT6plex [N-Term; K15]; 1xPhospho [S]	530375993 1xPhospho [S465(99.5)]	0.000419988	0	1	8	8	530375993	530375993 [453-467]	0	2029.91	S13(Phospho): 100	114.3	230.9	198.3	299.7	330	423.5	243.3	438.2	659.1	215.5	11.66	7.36	35.59	15.78	24.7	38.34	39.95	51.13	5.57	4.23				104.8	123.7		Unique	3.90961	High	0	0.0004275
High	[R].KQPPVSPGTALVGSQK.[E]	3xTMT6plex [N-Term; K1; K16]; 1xPhospho [S6(100)]	977380210 1xPhospho [S36(100)]	3.36372e-05	0	1	1	23	977380210	977380210 [31-46]	1	2361.35	S6(Phospho): 100	2993.7	7674.3	5972.1	1157.8	13615.4	785.9	6220.7	769.3	1233	1594.8	3.55	0.77	0.52	2.92	1.67	11.68	1.8	30.62	13.29	6.46							Unique	7.08202	High	0	1.013e-05
High	[K].QAPQGSRDSSSDSDSSSSEEEEEK.[T]	2xTMT6plex [N-Term; K24]; 1xPhospho [S9(100)]	530394600 1xPhospho [S480(100)]	1.6837e-05	0	1	4	27	530394600	530394600 [472-495]	1	3096.32	S9(Phospho): 100	93.2	1273.2	287.1	681.4	3752.5	339.6	441.7	582.2	1517.9	101.2		14.47	6.87	19.26	15.85	10.06	20.79	3.65	17.04	42.64				93.2			Unique	6.58651	High	0	2.989e-06
High	[R].RPDHSGGSPSPPTSEPAR.[S]	1xTMT6plex [N-Term]; 1xPhospho [S/T]	21314720 1xPhospho [S52(100)]	0.000307545	0	1	1	25	21314720	21314720 [45-62]	0	2141	S8(Phospho): 100	76.6		324	128.6	131.2	53	296.4	117.7	256.8				12.53	48.57			7.24	22.84	11.56								Unique	4.34652	High	0	0.0003288
High	[R].GSGHSQEQPAPQPSGGDPSPPQER.[N]	1xTMT6plex [N-Term]; 1xPhospho [S19(100)]	217416347 1xPhospho [S725(99.5)]	0.000224047	0	1	2	7	217416347	217416347 [707-730]	0	2736.22	S19(Phospho): 100		38.1	39.8	76.6	43.6	36.4		53.3	84.5	54.3		18.97	44.06	39.76	63.14			51.99	31.97								Unique	4.14021	High	0	0.0002276
High	[K].QEPSSQGSQSALQTYELGSENVK.[V]	2xTMT6plex [N-Term; K23]; 1xPhospho [S8(100)]	22749367 1xPhospho [S115(100)]	0.000301253	0	1	1	7	22749367	22749367 [108-130]	0	3005.45	S8(Phospho): 100	205.9	89.3	87.4	82.4	70	72.5	79.7	74.8	71.5	96.9	50.61	39.92	42.43	32.19	35.65	13.71	70.16	6.12	18.96	10.62				279.6	132.2		Unique	5.03496	High	0	0.0003221
High	[K].SSSNDSVDEETAESDTSPVLEK.[E]	2xTMT6plex [N-Term; K22]; 1xPhospho [S/T]	767975924 1xPhospho [S429(100)]	0.000100696	0	1	8	10	767975924	767975924 [416-437]	0	2864.3	S3(Phospho): 99.45	586.4	1056.1	750.6	1023.9	642.9	800.5	707.8	799.2	807	856.2																586.4	Unique	6.61929	High	0	6.877e-05
High	[R].LQSSSASYGGGFGGGSCQLGGGR.[G]	1xTMT6plex [N-Term]; 1xCarbamidomethyl [C17]; 1xPhospho [S7(100)]	131412225 1xPhospho [S11(100)]	0.000110988	0	1	2	19	131412225	131412225 [5-27]	0	2456.09	S7(Phospho): 100	958.8	335.3	1057.5	416.7	518.7	426.9	300.4	457.4	597.6	446.1	18.94	2.89	26.34	21.28	1.65	4.33	25.83	26.81	12.3	28.78							Unique	5.18872	High	0	8.088e-05
High	[R].ESPGAAATSSSGPQAQQHR.[G]	1xTMT6plex [N-Term]; 1xPhospho [S2(100)]	47271406 1xPhospho [S69(100)]	6.25312e-06	0	1	1	2	47271406	47271406 [68-86]	0	2176	S2(Phospho): 100		96.4	71.1	105.9	130.7	144.4	55.7	163.7	266.1	59.5		24.24	7.4	19.01	6.38	25.27	17.97	6.53	24.38								Unique	7.29651	High	0	6.463e-07
High	[R].ASGEMASAQYITAALR.[D]	1xTMT6plex [N-Term]; 1xPhospho [Y/T/S]	4827050 1xPhospho [S143(100)]	0.000333584	0	1	2	10	4827050	4827050 [142-157]	0	1948.94	S2(Phospho): 100	437.9	309.9	431.5	355.4	305.2	537.5	308.1	343.4	510.4	472.9	6.63	0.18	6.22	7.56	0.06	0.98	4.82	10.2	7.62	1.74				417.4	458.4		Unique	5.6571	High	0	0.0003565
High	[K].KPEEESESSEEGSESEEEAPAGTR.[S]	2xTMT6plex [N-Term; K1]; 2xPhospho [S8(100); S9(100)]	530380671 2xPhospho [S279(99.4); S/T]; 207113162 2xPhospho [S279(99.4); S/T]; 530380673 2xPhospho [S279(99.4); S/T]	2.16848e-05	0	3	15	9	530380671; 207113162; 530380673	530380671 [265-288]; 207113162 [265-288]; 530380673 [265-288]	0	3198.33	S8(Phospho): 100; S9(Phospho): 100	575.1	779.6	1116	1962.6	903.9	1123.7	683.5	1618.7	1785.5	863.2																575.1	Not Unique	7.48583	High	0	5.073e-06
High	[K].KPEEESESSEEGSESEEEAPAGTR.[S]	2xTMT6plex [N-Term; K1]; 1xPhospho [S8(99.7)]		1.82672e-06	0	3	15	16	530380671; 207113162; 530380673	530380671 [265-288]; 207113162 [265-288]; 530380673 [265-288]	0	3118.36	S8(Phospho): 99.71	103.4	331.4	265	656.5	393	401	130.4	430.9	449.4	133.2	59.23	51.11	61.51	66.66	55.02	69.54	44.64	67.51	58.45	81.08						49.2	Not Unique	8.9748	High	0	7.6e-08
High	[K].AAPPPPPPPPPLESSPR.[V]	1xTMT6plex [N-Term]; 1xPhospho [S]		0.000275379	0	1	24	54	767903406	767903406 [606-622]	0	2013.04	S14(Phospho): 50; S15(Phospho): 50	590.7	758	799.9	896	1091.2	1042.4	651.7	600.3	857.6	1202.2	14.91	48.59	9.6	0.66	4.03	24.91	1.32	18.18	6.63	6.04							Unique	5.03053	High	0	0.000358
High	[K].TGQLEGAPAPGPAASPQTLDHSGATATGGASELK.[T]	2xTMT6plex [N-Term; K34]; 1xPhospho [S15(100)]	24497501 1xPhospho [S331(100)]	0.000174416	0	1	2	1	24497501	24497501 [317-350]	0	3683.83	S15(Phospho): 100		107.3	163.6	68.7	58.3	251.8	63.6	56	62.1																		Unique	4.33903	High	0	0.0001617
High	[K].HGQEEAAQSPYR.[A]	1xTMT6plex [N-Term]; 1xPhospho [S9(100)]	530360540 1xPhospho [S284(100)]	0.000409734	0	1	1	3	530360540	530360540 [276-287]	0	1681.75	S9(Phospho): 100	104.9	103.5	114.5	58.1	78.5	126.4	187.2	67.3	104	189.3	36.76	28.03	50.4	34.29	7.31	53.94	28.98	26.64	58.77	32.07				77.7	132.2		Unique	4.62692	High	0	0.0004206
High	[K].QQQLEEEAAKPPEPEKPVSPPPIESK.[H]	4xTMT6plex [N-Term; K10; K16; K26]; 1xPhospho [S19(100)]	331284178 1xPhospho [S215(100)]	0.000339692	0	1	3	5	331284178	331284178 [197-222]	0	3879.1	S19(Phospho): 100	245.4	354.5	242.2	369.7	249.9	434.7	255.9	416.1	403.4	293.8																	Unique	3.75363	High	0.0002786	0.0005509
High	[R].KVTAEADSSSPTGILATSESK.[S]	3xTMT6plex [N-Term; K1; K21]; 1xPhospho [S/T]	187761324 1xPhospho [S493(99.6)]	8.90176e-05	0	1	6	7	187761324	187761324 [485-505]	1	2846.5	S10(Phospho): 99.63	318.5	131.6	611.6	408	374.8	209.9	633.9	165.8	260.3	541.9	32.89	28.12	29.55	31.18	37.73	47.89	44.62	33.77	46.26	32.89							Unique	4.21175	High	0	0.0001368
High	[R].QPPGTQQSHSSPGEITSSPQGLDNPALLR.[D]	1xTMT6plex [N-Term]; 1xPhospho [S/T]		1.93783e-05	0	1	1	26	62955833	62955833 [111-139]	0	3308.61	S11(Phospho): 100	282.1	400.3	644	323.4	319.3	360.6	250.6	298.4	317.3	244.2	59.13	9.08	13.11	0.03	6.12	56.18	17.24	54.2	2.17	38.61							Unique	5.83488	High	0	3.835e-06
High	[R].ASGEMASAQYITAALR.[D]	1xTMT6plex [N-Term]; 1xOxidation [M5(100)]; 1xPhospho [S2(100)]	4827050 1xPhospho [S143(100)]	0.000427576	0	1	2	13	4827050	4827050 [142-157]	0	1964.94	S2(Phospho): 100; M5(Oxidation): 100	212.8	249.3	202.6	233	255.6	258.5	173.5	210.6	204.4	271.1	8.23	28.14	38.62	42.61	14.19	54.98	55.67	61.29	46.25	23.6				225.2	200.4		Unique	4.59734	High	0	0.0004319
High	[R].QQAAYYAQTSPQGMPQHPPAPQGQ.[-]	1xTMT6plex [N-Term]; 1xOxidation [M14(100)]; 1xPhospho [T/S/Y]		0.000200177	0	1	4	14	742670570	742670570 [642-665]	0	2906.31	T9(Phospho): 50; S10(Phospho): 50; M14(Oxidation): 100	117.5	134.2	170.8	205.4	190.9	203.2	192.3	195	246.5	236.4	68.99	9.08	25.05	4.04	30.3	59.38	5.88	15.2	12.56	35.85				60.2	174.8		Unique	3.77282	High	0	0.0001959
High	[R].VTQHESDNENEIQIQNK.[L]	2xTMT6plex [N-Term; K17]; 1xPhospho [S6(100)]	530363589 1xPhospho [S125(100)]	6.40785e-05	0	1	4	9	530363589	530363589 [120-136]	0	2564.24	S6(Phospho): 100	774.2	468.8	735.4	623.7	1024.6	648.9	367.7	1354.2	706.7	753.6	19.43	5.89	15.93	17.26	20.6	25.68	12.64	23.07	24.14	17.84				667.8	880.6		Unique	6.33693	High	0	3.164e-05
High	[K].KSCVEEPEPEPEAAEGDGDKK.[G]	4xTMT6plex [N-Term; K1; K20; K21]; 1xCarbamidomethyl [C3]; 1xPhospho [S2(100)]	186928819 1xPhospho [S123(100)]	4.36986e-05	0	1	5	7	186928819	186928819 [122-142]	2	3297.64	S2(Phospho): 100	110.6	130.4	167.3	98.2	2778	186.4	288.7	127.4	156.8	181.1	5.07	38.13	44.44	18.68	53.49	61.66	18.99	5.87	34.48	38.79				114.5	106.6		Unique	5.83903	High	0	1.607e-05
High	[K].ASLGSLEGEAEAEASSPK.[G]	2xTMT6plex [N-Term; K18]; 2xPhospho [S2(100); S16(100)]	1034575326 2xPhospho [S5682(100); S5685(100)]	0.000337241	0	1	5	8	1034575326	1034575326 [5681-5698]	0	2351.08	S2(Phospho): 100; S5(Phospho): 100	954.8	761.2	973.9	491.7	539.6	906.6	906.2	436.2	719.6	578.5																954.8	Unique	5.98133	High	0	0.0003665
High	[K].ASLGSLEGEAEAEASSPK.[G]	2xTMT6plex [N-Term; K18]; 1xPhospho [S]	1034575326 1xPhospho [S5696(99.6)]	2.44238e-05	0	1	5	16	1034575326	1034575326 [5681-5698]	0	2271.12	S16(Phospho): 100	591.8	238.4	776.9	391.7	318.5	544.2	812.9	384.6	646.9	547.1	3.33	17.57	6.69	22.68	24.29	10.97	7.43	2.58	10.76	22.08				605.7	577.8		Unique	5.42342	High	0	5.762e-06
High	[K].LQVYEGGGQPPPQDLPGSPK.[S]	2xTMT6plex [N-Term; K20]; 1xPhospho [S18(100)]	767993707 1xPhospho [S413(100)]	0.000377731	0	1	9	3	767993707	767993707 [396-415]	0	2602.33	S18(Phospho): 100	292.4	119.8	121.8	153.8	115.7	141.9	123.5	177.7	139	288.7	86.76	71.68	29.61	48.21	78.64	57.35	69.47	67.7	48.76	46.3				471.8	113		Unique	3.58899	High	0	0.0003966
High	[R].LHSSNPNLSTLDFGEEK.[N]	2xTMT6plex [N-Term; K17]; 1xPhospho [S4(99.7)]	767945170 1xPhospho [S304(100)]	0.000114399	0	1	6	18	767945170	767945170 [301-317]	0	2426.2	S4(Phospho): 100	1089.6	1657.2	2615.8	1279.3	876.2	1521.9	1948.1	731.1	1933.6	1207.3	19.09	8.02	8.64	16.27	25.57	22.04	7.39	25.2	7.72	15.61				1236.7	942.5		Unique	6.7638	High	0	8.498e-05
High	[R].GNLNLSPTSPETMAGPVPTSPVR.[S]	1xTMT6plex [N-Term]; 1xPhospho [S20(99.6)]	530388778 1xPhospho [S1263(99.6)]	0.000326946	0	1	10	2	530388778	530388778 [1244-1266]	0	2631.31	S20(Phospho): 99.55	135.7	92.2	97.2	123.4	126.8	164.1	110.5	124.7	116.5	116.1																135.7	Unique	5.0298	High	0	0.0003495
High	[R].STPESGDSDKESVGSSSTSNEGGR.[R]	2xTMT6plex [N-Term; K10]; 1xPhospho [S8(98.8)]		0.000146226	0	1	5	5	118026942	118026942 [460-483]	1	2895.29	S5(Phospho): 49.87; S8(Phospho): 49.87	301.7	332.5	746.6	539	287.2	504.2	609.1	601	663.3	477.5																301.7	Unique	5.99918	High	0	0.0001247
High	[R].NKIEEAPEATPQPSQPGPSSPISLSAEEENAEGEVSR.[A]	2xTMT6plex [N-Term; K2]; 1xPhospho [S/T]		0.000122587	0	1	2	9	190358532	190358532 [15-51]	1	4400.12	S19(Phospho): 50; S20(Phospho): 50	102	67.6	87.3	81.9	80	84.4	72.4	116.4	63	87.7	41.84	29.02	1.84	44.67	15.11	19.46	7.34	7.01	20.89	16.59				71.8	132.2		Unique	4.37454	High	0	9.48e-05
High	[K].VQEAQDSDSDSEGGAAGGEADMDFLR.[N]	1xTMT6plex [N-Term]; 1xOxidation [M22(100)]; 1xPhospho [S9(99.3)]	13775600 1xPhospho [S25(99.3)]	4.9861e-05	0	1	1	6	13775600	13775600 [17-42]	0	2982.21	S9(Phospho): 99.99; M22(Oxidation): 100	83.6	64.6	80.3	93.8	63.6	73.7	106.5	106.6	84.6	78.6	36.27	18.71	54.27	22.13	47.17	71.62	18.58	13.65	26.39	20.93				62.1		105	Unique	5.46917	High	0	2.032e-05
High	[R].YSGAYGASVSDEELK.[R]	2xTMT6plex [N-Term; K15]; 1xPhospho [S2(100)]	953768340 1xPhospho [S50(100)]	0.000368006	0	1	3	14	953768340	953768340 [49-63]	0	2114.01	S2(Phospho): 100	1675.9	412.8	570.9	535.9	771.2	841.9	390.1	643.7	711.2	530.6	17.99	18.3	17.61	24.75	26.03	23.87	33.55	14.96	22.56	20.2				1889	1462.7		Unique	4.53352	High	0	0.0003885
High	[K].EVEEDSEDEEMSEDEEDDSSGEEVVIPQK.[K]	2xTMT6plex [N-Term; K29]; 1xPhospho [S]		0.000196075	0	1	1	18	55956788	55956788 [23-51]	0	3851.6	S12(Phospho): 97.99	302.7	90.9	318.6	255.6	106	100.6	196.1	129.7	167	81	0.97	9.99	44.23	11.28	5.72	20.15	36.84	39.25	18.1	48.29				304.8	300.6		Unique	4.4739	High	0	0.0001906
High	[R].ESAAPAAAPTAEAPPPSVVTRPEPQALPSPAIR.[A]	1xTMT6plex [N-Term]; 1xPhospho [S29(100)]	148613856 1xPhospho [S64(100)]	8.34255e-05	0	1	2	12	148613856	148613856 [36-68]	0	3555.84	S29(Phospho): 100	127	270	201	170.9	364.6	186.4	257.3	144.2	184	276.2	22.47	0.21	14.06	1.38	11.66	18.67	10.11	27.88	19.74	5.87				106.8	147.1		Unique	5.64491	High	0	5.008e-05
High	[K].ADVLEAHEAEAEEPEAGKSEAEDDEDEVDDLPSSR.[R]	2xTMT6plex [N-Term; K18]; 1xPhospho [S19(100)]	767996353 1xPhospho [S569(100)]	0.000388254	0	1	12	1	767996353	767996353 [551-585]	1	4321.9	S19(Phospho): 100	81.5	23	48.4	28	25.4	60.7	27.7	102.8	73.4	69.4														81.5			Unique	3.81971	High	0	0.0004048
High	[K].SDDTSDDDFMEEGGEEDGGSDGMGGDGSEFLQR.[D]	1xTMT6plex [N-Term]; 2xOxidation [M10(100); M23(100)]; 1xPhospho [S20(100)]	5453682 1xPhospho [S252(100)]	0.000111711	0	1	1	2	5453682	5453682 [233-265]	0	3784.37	M10(Oxidation): 100; S20(Phospho): 100; M23(Oxidation): 100		395.2		223.5	230.5		85.3	265.7	165.6	107.3		36.91		22.67				42.68	53.4								Unique	4.34979	High	0	8.175e-05
High	[R].ESPRPLQLPGAEGPAISDGEEGGGEPGAGGGAAGAAGAGR.[R]	1xTMT6plex [N-Term]; 2xPhospho [S2(100); S17(100)]	530380464 2xPhospho [S75(100); S90(100)]	0.000259222	0	1	4	1	530380464	530380464 [74-113]	0	3916.77	S2(Phospho): 100; S17(Phospho): 100	52.5	38.6	66.5	40.3	54.7	49	99.2	43.1	71.9	72																52.5	Unique	4.39152	High	0	0.000272
High	[R].ESPRPLQLPGAEGPAISDGEEGGGEPGAGGGAAGAAGAGR.[R]	1xTMT6plex [N-Term]; 1xPhospho [S17(100)]	530380464 1xPhospho [S90(100)]	9.01983e-08	0	1	4	17	530380464	530380464 [74-113]	0	3836.8	S17(Phospho): 100	233.8	234.4	484.2	792.7	409.2	465.7	440.5	510.5	658.2	435.5	38.24	43.81	29.2	19.66	46.79	57.34	22.41	20.08	23.45	54.25				297	170.6		Unique	9.08495	High	0	4.908e-10
High	[K].DTLQTVSSSPVTEISR.[E]	1xTMT6plex [N-Term]; 1xPhospho [S/T]	55743124 1xPhospho [S402(99.6)]	0.000331765	0	1	5	9	55743124	55743124 [394-409]	0	2029.01	S9(Phospho): 99.56	216.1	153.8	201.1	215.4	147.6	145.3	157.2	155.7	215.1	268.5	9.29	19.23	25.19	27.74	2.34	6.86	7.07	10.27	1.12	2.31				201.9	230.3		Unique	4.2687	High	0	0.0003545
High	[K].TALETESQDSAEPSGSEEESDPVSLER.[E]	1xTMT6plex [N-Term]; 1xPhospho [S16(99.6)]	38176300 1xPhospho [S1502(100)]	6.18586e-06	0	1	1	27	38176300	38176300 [1483-1509]	0	3188.38	S16(Phospho): 100	1829.2	335.8	291.3	347.5	381.5	392.3	331.9	443.7	556.1	287.1	66.91	51.37	66.58	60.67	45.13	61.7	59.37	51.03	63.35	57.14				2694.7	963.8		Unique	7.00625	High	0	6.978e-07
High	[R].KQPPVSPGTALVGSQKEPSEVPTPK.[R]	4xTMT6plex [N-Term; K1; K16; K25]; 1xPhospho [S6(100)]	977380210 1xPhospho [S36(100)]	0.000106751	0	1	1	28	977380210	977380210 [31-55]	2	3555	S19(Phospho): 99.58	179.8	366.9	260.2	192.2	207.2	152.5	823.6	158.6	220.2	235.9	67.32	35.03	14.27	45.86	7.3	59.29	43.7	44.16	33.76	32.3				159.2	70.4	309.8	Unique	5.42529	High	0	7.587e-05
High	[K].SVEDEMDSPGEEPFYTGQGR.[S]	1xTMT6plex [N-Term]; 1xOxidation [M6(100)]; 1xPhospho [S8(100)]	224465184 1xPhospho [S332(100)]	6.85217e-05	0	1	9	9	224465184	224465184 [325-344]	0	2555.05	M6(Oxidation): 100; S8(Phospho): 100	477	565	426.2	353.5	289.8	315.4	1015.1	254.1	340.3	500.6	9.94	46.04	15.05	27.98	12.19	34.44	21.64	26.58	20.61	18.68				510.6	443.5		Unique	5.66022	High	0	3.551e-05
High	[K].EEGSSDEISSGVGDSESEGLNSPVK.[V]	2xTMT6plex [N-Term; K25]; 1xPhospho [S4(99.6)]	4504191 1xPhospho [S292(100)]	0.000159588	0	1	4	14	4504191	4504191 [271-295]	0	3033.38	S4(Phospho): 99.62	465.4	259.3	363.9	311.3	239.6	257.2	297.1	495	337.5	199																465.4	Unique	5.9125	High	0	0.0001952
High	[R].TVGTPIASVPGSTNTGTVPGSEK.[D]	2xTMT6plex [N-Term; K23]; 1xPhospho [T4(100)]	25777600 1xPhospho [T273(100)]	0.000137707	0	1	3	11	25777600	25777600 [270-292]	0	2695.4	T4(Phospho): 100	774.9	318.9	358.1	329	477.3	393.8	459.9	364.6	354.7	412.3	99.82	80.67	82.48	80.03	80.22	72.24	57.3	73.18	86.2	60.35				887.2	1825.2		Unique	4.94077	High	0	0.0002114
High	[R].KSVAAEGALLPQTPPSPR.[N]	2xTMT6plex [N-Term; K1]; 1xPhospho [S16(99.6)]	578801173 1xPhospho [S329(99.6)]	0.000402962	0	1	5	7	578801173	578801173 [314-331]	1	2357.3	S16(Phospho): 100	171.4	163.4	169.6	345	224.5	222.8	218.2	205.4	271.9	265.3	11.66	17.75	34.35	31.85	48.22	4.51	30.76	14.2	37.04	33.01				157.3	185.5		Unique	3.66222	High	0	0.0004157
High	[K].EVEEDSEDEEMSEDEEDDSSGEEVVIPQK.[K]	2xTMT6plex [N-Term; K29]; 1xOxidation [M11(100)]; 1xPhospho [S]		7.51996e-05	0	1	1	53	55956788	55956788 [23-51]	0	3867.59	M11(Oxidation): 100; S19(Phospho): 50; S20(Phospho): 50	1398.1	1058	1136.8	1632.1	340.3	460	769	644.3	802.5	455.2	0.36	2.31	3.66	1.18	18.84	7.98	9.25	8.04	0.26	5.8				1401.7	1394.5		Unique	4.91545	High	0	4.185e-05
High	[R].ALEQSQSLPLPAPTSTSPSR.[G]	1xTMT6plex [N-Term]; 2xPhospho [S7(99.5); S/T]	1034584156 2xPhospho [S992(99.5); S/T]	0.000390908	0	1	20	1	1034584156	1034584156 [986-1005]	0	2456.17	S7(Phospho): 99.47; S15(Phospho): 33.27; T16(Phospho): 33.27; S17(Phospho): 33.27	98.8	64.6	86.1	63.5	107.6	89.4	70.9	80.1	102.2	124.2																98.8	Unique	4.95023	High	0	0.000407
High	[R].SLEPPPGSPGEAPLAGAAPSLQDEVR.[E]	1xTMT6plex [N-Term]; 1xPhospho [S8(100)]	767967989 1xPhospho [S436(100)]	0.000111952	0	1	6	8	767967989	767967989 [429-454]	0	2851.41	S8(Phospho): 100	225.6	160	194.3	197.4	171	202.4	171.2	223	221	270.2	54.53	39.19	53.16	37.89	32.36	34.69	45.31	53.29	1.69	38.37				312.6	138.6		Unique	4.74895	High	0	8.198e-05
High	[R].WGGNPLQPPTTPSPEPEPEPDGR.[S]	1xTMT6plex [N-Term]; 1xPhospho [S13(100)]		0.000162321	0	1	1	23	4507475	4507475 [12-34]	0	2764.28	S13(Phospho): 100	242	203.1	318.9	573.1	207.1	732.3	315.1	319.9	341.6	349.5	43.96	30.97	25.63	29.65	28.15	30.35	23.26	23.72	33.42	21.09				281.5	121.5	323	Unique	5.15701	High	0	0.000146
High	[K].LATQSNEITIPVTFESR.[A]	1xTMT6plex [N-Term]; 1xPhospho [S5(99.6)]	4504517 1xPhospho [S176(99.6)]	0.000395575	0	1	1	2	4504517	4504517 [172-188]	0	2215.12	S5(Phospho): 99.55	1522.4	309.6	965.4	279.7	215.1	257.8	315.7	178.5	189.1	337																1522.4	Unique	5.76286	High	0	0.0004106
High	[R].KTAATAAAAAAEPPAPPPPPPPEEDPEQDSGPEDLPLVR.[L]	2xTMT6plex [N-Term; K1]; 1xPhospho [S30(100)]	108773787 1xPhospho [S37(100)]	0.00030296	0	1	1	5	108773787	108773787 [8-46]	1	4435.21	S30(Phospho): 100		16.1	67.2	29.5	89.3	68.2	33.5	33.7	34.6	44.1			60.27	17.18	11.61	18.45	36.75		8.71	41.36							Unique	3.96589	High	0	0.0003235
High	[K].KPATPAEDDEDDDIDLFGSDNEEEDKEAAQLR.[E]	3xTMT6plex [N-Term; K1; K26]; 1xPhospho [S19(100)]	578815866 1xPhospho [S545(100)]	0.000244279	0	1	10	16	578815866	578815866 [527-558]	1	4345.01	S19(Phospho): 100	512	262.5	465.8	593.9	295.3	602.7	573.8	545.4	824.5	888.6	78.99	68.8	69.16	76.46	66.2	84.75	61.23	66.43	56.88	66.22				797.9	226		Unique	4.5562	High	0	0.0002538
High	[K].DELHIVEAEAMNYEGSPIK.[V]	2xTMT6plex [N-Term; K19]; 1xOxidation [M11(100)]; 1xPhospho [S16(100)]	10835063 1xPhospho [S70(100)]	0.000126893	0	1	4	7	10835063	10835063 [55-73]	0	2699.3	M11(Oxidation): 100; S16(Phospho): 100	432.8	150.1	180.3	245.8	284.6	255.2	120.4	256.1	212.6	203.2	63.4	74.86	63.01	59.62	85.7	68.21	79.82	61.67	63.6	84.45				238.8	626.9		Unique	4.84714	High	0	0.0001
High	[K].ELSNSPLRENSFGSPLEFR.[N]	1xTMT6plex [N-Term]; 1xPhospho [S]	118572613 1xPhospho [S1320(99.6)]	0.000203092	0	1	2	7	118572613	118572613 [1316-1334]	1	2488.21	S5(Phospho): 100	303.6	465.1	800.1	1153.9	324.8	521.1	886.3	778.4	408.4	719	53.02	34.92	28.43	22.62	23.94	40.74	26.91	36.34	47.65	30.06				417.4	189.8		Unique	5.4014	High	0	0.0002001
High	[K].EAAVGVPPPAQPAPGEPTPPAPPSPDWTSSSR.[E]	1xTMT6plex [N-Term]; 1xPhospho [S/T]	530384558 1xPhospho [S49(95.8)]	0.000376426	0	1	1	3	530384558	530384558 [26-57]	0	3456.67	S24(Phospho): 100	93.2	50.6	51.7	52.9	96.2	69.1	84.1	49.1	64.3	95.4		19.04	48.47	40.54	49.69	10.36	27.08	12.12	17.79	16.65				93.2			Unique	3.79226	High	0	0.0003956
High	[R].SSSAEESGQDVLENTFSQK.[H]	2xTMT6plex [N-Term; K19]; 1xPhospho [S/T]		4.01641e-05	0	1	15	24	374532817	374532817 [542-560]	0	2581.21	S3(Phospho): 99.32	769.5	837.1	859.7	618	555.8	599.6	704.7	575.6	799.5	681.9	3.09	1.71	5.5	8.17	18.73	17.54	2.34	15.87	5.67	2.87				786.3	752.7		Unique	5.6913	High	0	4.547e-05
High	[K].LPVGSQCSVDLESASGEK.[D]	2xTMT6plex [N-Term; K18]; 1xCarbamidomethyl [C7]; 1xPhospho [S15(100)]	530391083 1xPhospho [S72(100)]	5.76355e-05	0	1	17	4	530391083	530391083 [58-75]	0	2401.17	S15(Phospho): 100	494.7	240.4	325.3	221	1371.2	394.3	298.6	370.6	580.2	378.8															494.7		Unique	5.2921	High	0	5.267e-05
High	[K].LPPPPPQAPPEEENESEPEEPSGVEGAAFQSR.[L]	1xTMT6plex [N-Term]; 1xPhospho [S16(100)]	578798679 1xPhospho [S166(100)]	3.11851e-05	0	1	3	24	578798679	578798679 [151-182]	0	3707.7	S16(Phospho): 100	644	383.1	445.3	487.4	526.7	502.6	330.9	575.2	634.1	563.1	44.03	25.02	19.03	32.86	35.19	45.21	26.12	31.66	56.82	51.06				844.5	443.5		Unique	5.73499	High	0	1.14e-05
High	[R].AFAAVPTSHPPEDAPAQPPTPGPAASPEQLSFR.[E]	1xTMT6plex [N-Term]; 1xPhospho [T/S]		6.42172e-05	0	1	2	8	355390315	355390315 [1323-1355]	0	3647.77	S26(Phospho): 100	163.8	70.2	227.1	164	134.2	112.9	178.8	113.1	103.2	196.7	71.46	44.23	45.42	37.28	51.24	37.55	29.84	76.5	45.65	36				246.6	81		Unique	6.21548	High	0	3.168e-05
High	[R].IFPPETSASVAATPPPSTASAPAAVNSSASADKPLSNMK.[I]	3xTMT6plex [N-Term; K33; K39]; 1xPhospho [T13(97.2)]		1.17078e-05	0	1	1	14	156523968	156523968 [356-394]	0	4535.33	T13(Phospho): 97.2	171.7	76.7	222.7	163.7	103.8	146.4	146.8	181.2	160.1	223.5																171.7	Unique	6.04677	High	0	1.577e-06
High	[R].EVEEELATSGGQSPTGEQIPQFQQR.[Q]	1xTMT6plex [N-Term]; 1xPhospho [T/S]	530362268 1xPhospho [S5861(99.5)]	1.03276e-05	0	1	31	25	530362268	530362268 [5849-5873]	0	3054.43	S13(Phospho): 99.25	304.6	250.7	232.1	284	239.8	256.3	1268.2	232.2	326.8	219.2																304.6	Unique	6.87278	High	0	1.262e-06
High	[R].INSSGESGDESDEFLQSR.[K]	1xTMT6plex [N-Term]; 1xPhospho [S3(99.7)]	84043963 1xPhospho [S190(100)]	0.000205618	0	1	1	7	84043963	84043963 [180-197]	0	2265.97	S3(Phospho): 99.74	365.6	573.4	480.4	607.8	533.6	457.9	501.1	422.8	576.7	388.7																365.6	Unique	6.27935	High	0	0.0002433
High	[R].SSDSEEAFETPESTTPVK.[A]	2xTMT6plex [N-Term; K18]; 1xPhospho [S1(100)]	530392793 1xPhospho [S1879(100)]	0.000135943	0	1	31	7	530392793	530392793 [1879-1896]	0	2479.15	S1(Phospho): 100	316.9	291.7	216.2	449.7	160.7	261.9	171.9	141.7	180	156																316.9	Unique	5.44854	High	0	0.0001117
High	[R].SASPDDDLGSSNWEAADLGNEER.[K]	1xTMT6plex [N-Term]; 1xPhospho [S3(99.4)]	7657234 1xPhospho [S17(100)]	7.2125e-06	0	1	1	50	7657234	7657234 [15-37]	0	2744.15	S3(Phospho): 100	914.9	1093.4	1914.7	2619	2674.3	1480.8	3180.4	1612	1447.7	886.5	19.14	9.39	0.61	5.23	1.89	6.36	12.16	0.33	3.56	11.9				1038.7	791.1		Unique	7.51657	High	0	6.713e-07
High	[R].RVSGEPQQSGDGSLSPQAEAIEVAAGESAGR.[S]	1xTMT6plex [N-Term]; 1xPhospho [S3(100)]	1034627393 1xPhospho [S293(100)]	4.52076e-06	0	1	3	15	1034627393	1034627393 [291-321]	1	3349.59	S3(Phospho): 100	494.2	415.2	663.4	411.8	2133.3	612.8	511.9	490.2	791.7	509																494.2	Unique	9.04372	High	0	2.939e-07
High	[K].KKEPAITSQNSPEAR.[E]	3xTMT6plex [N-Term; K1; K2]; 1xPhospho [S/T]	5803191 1xPhospho [S100(100)]	5.86413e-05	0	1	4	35	5803191	5803191 [90-104]	2	2423.33	S11(Phospho): 100	5226.5	7104.2	11326.5	10003.1	3821	8545	5637.7	9063.1	14071	7674.9	6.57	9	10.17	11.41	17.87	15.63	11.56	10.24	9.36	15.9							Unique	6.59852	High	0	4.821e-05
High	[K].YKVPQLEIVPNSAEER.[L]	2xTMT6plex [N-Term; K2]; 1xPhospho [S12(100)]	gi 1xPhospho [S130(100)]	0.000114152	0	1	1	27	gi	gi [119-134]	1	2410.28	S12(Phospho): 100	1090.6	3502.4	575.4	897.6	514.2	1131.2	661.9	658	863.3	1155.1	69.66	38.47	36.91	28.22	44.33	39.91	8.32	28.44	40.68	37.46				1879.3	1850.8		Unique	6.14982	High	0	9.527e-05
High	[K].LAPVPSPEPQKPAPVSPESVK.[A]	3xTMT6plex [N-Term; K11; K21]; 2xPhospho [S6(100); S16(100)]	255918139 2xPhospho [S204(100); S214(99.5)]	0.000400941	0	1	1	22	255918139	255918139 [199-219]	0	3001.6	S6(Phospho): 100; S16(Phospho): 100	339.3	558.7	820.7	568.9	279.2	557	790.7	403.9	666.6	971.3	79.92	83.88	83.19	80.55	71.32	79.48	81.87	73.63	77.5	79.85				479.5	511.7		Unique	5.55853	High	0	0.0004217
High	[K].KASPEAASTPRDPIDVDLPEEAER.[V]	2xTMT6plex [N-Term; K1]; 1xPhospho [S3(100)]	67089157 1xPhospho [S403(100)]	5.7139e-05	0	1	5	14	67089157	67089157 [401-424]	2	3131.57	S3(Phospho): 100	262.7	1142.4	545.8	1557.1	435.3	1584.7	486.4	1925.4	1867.3	573.3	18.11	32.74	27.15	31.04	34.88	38.93	27.72	30.46	38.14	40.46				229.1	296.4		Unique	6.67725	High	0	2.582e-05
High	[K].SIQDVRSDDEDYEEEEEEEEEEATK.[G]	2xTMT6plex [N-Term; K25]; 1xPhospho [S7(100)]	767983611 1xPhospho [S351(100)]	1.21383e-06	0	1	2	32	767983611	767983611 [345-369]	1	3570.51	S7(Phospho): 100	12706	736.2	3381.6	2848	561	2431.7	1913.6	566.7	743.3	1254.6	20.12	16.6	23.11	19.24	19.86	19.91	24.31	30.02	19.63	19.75				14514	10897.9		Unique	8.1967	High	0	8.439e-08
High	[R].RPPSPDVIVLSDNEQPSSPR.[V]	1xTMT6plex [N-Term]; 3xPhospho [S4(100); S11(100); S]	1034608313 3xPhospho [S119(100); S132(100); S133(100)]	0.000244279	0	1	7	8	1034608313	1034608313 [116-135]	0	2659.18	S4(Phospho): 100; S11(Phospho): 100; S17(Phospho): 50; S18(Phospho): 50	681	228.6	590.1	734.6	726	812.6	567.2	725.4	461.5	626.5																681	Unique	6.30227	High	0	0.0002532
High	[R].QPLSEASNQQPLSGGEEK.[S]	2xTMT6plex [N-Term; K18]; 1xPhospho [S13(100)]	578813549 1xPhospho [S54(100)]	0.00026539	0	1	8	1	578813549	578813549 [42-59]	0	2437.2	S13(Phospho): 100	248.5	59.9	207.3	177.2	111.2	144.2	187	98.9	142.2	163.7														248.5			Unique	4.17938	High	0	0.0002799
High	[R].AAAAAATAPPSPGPAQPGPR.[A]	1xTMT6plex [N-Term]; 1xPhospho [S/T]	39930517 1xPhospho [S161(100)]	6.89678e-05	0	1	1	9	39930517	39930517 [151-170]	0	2065.04	S11(Phospho): 100	242.6	624.2	372.6	321.4	708.3	427.7	197	344.8	414.1	445.2	79.8	27.96	40.61	28.59	36.66	92.34	33.9	41.88	30.49	54.81							Unique	5.03607	High	0	3.6e-05
High	[R].ATASEQPLAQEPPASGGSPATTK.[E]	2xTMT6plex [N-Term; K23]; 1xPhospho [S/T]	20070205 1xPhospho [S301(99.6)]	6.74481e-06	0	1	1	22	20070205	20070205 [284-306]	0	2734.37	S18(Phospho): 100	514.8	461.2	436	448.1	443.3	330.9	3480.4	356.3	474.9	544.2	8.45	6.72	5.39	0.83	17.25	23.34	1.72	2.14	5.43	1.34				545.5	484		Unique	7.29524	High	0	5.948e-07
High	[K].GNDESESDFESDPPSPK.[S]	2xTMT6plex [N-Term; K17]; 1xPhospho [S15(100)]	38787935 1xPhospho [S750(100)]	0.000177749	0	1	4	2	38787935	38787935 [736-752]	0	2375.03	S15(Phospho): 100	127	188.8	78.1	124.1	234.6	190	102.5	230	273.1	95.2	1.3	9.31	2.27	13.67	0.57	19.08	0.74	4.18	7.66	24.41				128.1	125.8		Unique	4.57765	High	0	0.0001663
High	[R].AADSQNSGEGNTGAAESSFSQEVSR.[E]	1xTMT6plex [N-Term]; 1xPhospho [S4(99.6)]	114155142 1xPhospho [S2034(99.6)]	2.14981e-05	0	1	1	4	114155142	114155142 [2031-2055]	0	2795.2	S4(Phospho): 99.65	150.5	74.8	151.4	150.9	92	96.6	195.7	94.2	119.1	160.3	83.03	63.02	61.8	74.82	47.3	56.6	40.11	39.84	88.29	55				62.1	238.8		Unique	6.75027	High	0	4.609e-06
High	[R].KSVSTSSPAGAAIASTSGASNNSSSN.[-]	2xTMT6plex [N-Term; K1]; 1xPhospho [S25(99.5)]	767993294 1xPhospho [S771(99.5)]	0.000433129	0	1	17	2	767993294	767993294 [747-772]	1	2878.38	S25(Phospho): 99.47	68.2	34.1	104.3	27	36.2	71.3	31.9	74.4	83.6	72															68.2		Unique	3.78664	High	0	0.0004352
High	[K].DKSPVREPIDNLTPEER.[D]	2xTMT6plex [N-Term; K2]; 1xPhospho [S3(100)]	35493811 1xPhospho [S136(100)]	0.000266949	0	1	7	15	35493811	35493811 [134-150]	2	2533.31	S3(Phospho): 100	1997.8	1875.9	1677.1	2347.8	1581.1	2343.4	1199.8	2267.7	2308.5	2131.3	27.61	25.52	27.21	22.17	17.96	26.4	22.96	19.82	18.35	21.59				2387.9	1607.7		Unique	6.2493	High	0	0.0002814
High	[R].EDKSPSEESAPTTSPESVSGSVPSSGSSGR.[E]	2xTMT6plex [N-Term; K3]; 1xPhospho [S4(100)]	4826964 1xPhospho [S123(100)]	2.46732e-06	0	1	3	24	4826964	4826964 [120-149]	1	3460.6	S4(Phospho): 100	3017.1	2317.7	2887.4	1687.7	1393.7	1742.5	1783.1	596.5	1499.7	1932.5	16.76	20.7	24.99	16.45	14.08	15.62	16.09	22.37	19.72	17.6							Unique	8.37389	High	0	1.009e-07
High	[K].RASPNSDDTVLSPQELQK.[V]	2xTMT6plex [N-Term; K18]; 1xPhospho [S3(100)]	530422070 1xPhospho [S110(100)]	0.000380348	0	1	1	7	530422070	530422070 [108-125]	1	2523.29	S3(Phospho): 100	277.2	458	502.6	198.3	1946.6	290.9	279.9	270.7	312.5	294.3	33.56	17.24	22.98	41.46	11.82	3.54	16.69	42.53	8.38	21.11							Unique	5.00799	High	0	0.0004142
High	[R].SGGGFSSGSAGIINYQR.[R]	1xTMT6plex [N-Term]; 1xPhospho [S9(99.6)]	119395750 1xPhospho [S21(100)]	0.000130497	0	1	2	26	119395750	119395750 [13-29]	0	1966.92	S9(Phospho): 100	661.4	544.8	2077.5	599.2	690.3	1167	7813.6	511.9	904.4	600.9	4.02	0.67	17.21	7.7	13.05	11.31	20	15.25	7.97	3.96				642.6	680.2		Unique	6.10761	High	0	0.000235
High	[R].EQGTESRSSTPLPTISSSAENTR.[Q]	1xTMT6plex [N-Term]; 2xPhospho [S6(100); S9(99.3)]		0.000280206	0	2	5	7	808175976; 4507555	808175976 [151-173]; 4507555 [151-173]	1	2824.26	S6(Phospho): 99.99; S9(Phospho): 99.26	172.9	106.7	259.8	129.3	122.3	123.4	165.7	204.4	200.6	185	12.96	74.88	71.9	64.77	67.73	39.92	52.77	62.49	30.77	47.15				184.4	147.1	187.3	Not Unique	5.12576	High	0	0.0002978
High	[R].LAEDEGDSEPEAVGQSR.[G]	1xTMT6plex [N-Term]; 1xPhospho [S8(100)]	14670392 1xPhospho [S1468(100)]	0.000345248	0	1	1	26	14670392	14670392 [1461-1477]	0	2097.92	S8(Phospho): 100	1365.3	1323.8	1581.4	1385.8	1568.9	1255	2052.5	1232.5	2330.7	1809.5	1.26	16.78	11.62	16.48	18.93	9.42	21.54	28.85	24.92	17.65				1353.2	1377.4		Unique	4.89468	High	0	0.0003952
High	[K].EQLSETEGSGEDEPGNDPSETTQK.[K]	2xTMT6plex [N-Term; K24]; 1xPhospho [S9(100)]	40795665 1xPhospho [S680(100)]	0.000289489	0	1	2	4	40795665	40795665 [672-695]	0	3102.37	S9(Phospho): 100	237.1	88.4	130.1	145.4	110.6	152.1	166.3	141.4	216.5	138.4	17.53	23.53	5.23	13.84	24.58	58.73	9.2	42.51	20.79	37.53				207.7	266.5		Unique	4.29323	High	0	0.0003085
High	[K].KSLDSDESEDEEDDYQQK.[R]	3xTMT6plex [N-Term; K1; K18]; 1xPhospho [S5(100)]	7657441 1xPhospho [S60(99.5)]	7.40697e-05	0	1	1	11	7657441	7657441 [56-73]	1	2927.33	S5(Phospho): 100	317.8	117.7	303.7	348.2	166.2	167.2	256.2	242.8	373.6	350.9	46.22	19.94	55.33	18.71	42.75	28.85	19.92	43.65	27.91	11.89				423.2	409.4	440.8	Unique	6.80189	High	0	4.08e-05
High	[K].ASSSDSEDSSEEEEEVQGPPAK.[K]	2xTMT6plex [N-Term; K22]; 1xPhospho [S10(99.6)]	530394600 1xPhospho [S85(99.3)]	3.15924e-05	0	1	4	78	530394600	530394600 [83-104]	0	2832.23	S3(Phospho): 99.26	371.5	1079.3	453	724.7	1219.6	833.1	462.4	1107.5	941.9	537.2	24.1	51.76	16.88	11.43	54.12	10.55	23.3	31.99	18.95	31.08				442.6	400.9	271	Unique	6.59552	High	0	1.129e-05
High	[R].LLEGEDAHLSSSQFSSGSQSSRDVTSSSR.[Q]	1xTMT6plex [N-Term]; 2xPhospho [S18(98.1); S/T]	15431310 2xPhospho [S438(98.6); S/T]	3.51241e-05	0	1	1	152	15431310	15431310 [418-446]	1	3430.5	S16(Phospho): 97.32; S20(Phospho): 49.34; S21(Phospho): 49.34	289.8	359.1	363.5	885.9	324.6	596.9	1382.3	332.8	408.1	381.2	30.26	3.47	39.29	14.89	24.97	34.41	42.38	34.54	38.58	34.27				289.3	396.6		Unique	6.85917	High	0	2.096e-05
High	[R].LLEGEDAHLSSSQFSSGSQSSRDVTSSSR.[Q]	1xTMT6plex [N-Term]; 1xPhospho [S/T]		5.62805e-05	0	1	1	65	15431310	15431310 [418-446]	1	3350.53	S15(Phospho): 33.19; S16(Phospho): 33.19; S18(Phospho): 33.19		319.2	355.9	874.9	147.5	383.9	873.2	309.9	262.6	179.3		25.01	27.42	15.36	98.17	5.06	9.74	8.27	15.66	21.98							Unique	5.6586	High	0	2.52e-05
High	[R].SREDSPELNPPPGIEDNR.[Q]	1xTMT6plex [N-Term]; 1xPhospho [S5(100)]	767970167 1xPhospho [S1894(99.7)]	0.000175152	0	1	7	9	767970167	767970167 [1890-1907]	1	2331.08	S5(Phospho): 100	207.5	222.4	259.5	277.9	394.3	352.7	223.9	367.8	347.4	654.8	17.02	6.15	4.34	12.45	0.48	0.91	22.42	4.33	3.77	16.06				182.5	232.4		Unique	5.2396	High	0	0.0001628
High	[R].SDKSPDLAPTPAPQSTPR.[N]	2xTMT6plex [N-Term; K3]; 1xPhospho [S/T]		0.000155566	0	1	5	19	54873624	54873624 [503-520]	1	2403.23	S4(Phospho): 100	1243.3	2273.4	2819.8	3525.3	1917.6	1296.6	2537.1	1081.9	2176.9	1279.2	1.99	0.69	2.98	7.28	2	24.23	11.92	28.36	2.59	23.79							Unique	5.39574	High	0	0.000137
High	[K].AGLESGAEPGDGDSDTTKK.[K]	3xTMT6plex [N-Term; K18; K19]; 1xPhospho [S14(100)]	4503337 1xPhospho [S494(98.8)]	0.000116395	0	1	2	34	4503337	4503337 [481-499]	1	2602.29	S14(Phospho): 100	1193.7	1998.5	1004.2	1714.3	1554	2051.6	966	1572.5	1160.3	870.6	83.07	63.16	104.85	79.91	51.29	94.82	87.03	78.3	74.92	81.08							Unique	4.74326	High	0	8.732e-05
High	[R].HSPQQEEENTIFK.[A]	2xTMT6plex [N-Term; K13]; 1xPhospho [S2(100)]	5453700 1xPhospho [S47(100)]	0.000311595	0	1	1	6	5453700	5453700 [46-58]	0	2125.04	S2(Phospho): 100	271.5	222.6	231.9	229.9	153.8	220.6	299.4	151.4	273.1	348.1	49.98	32.54	56.27	39.04	41.53	38.56	22.25	16.61	34.4	18.63				314.5	432.8		Unique	5.49622	High	0	0.0003329
High	[K].SLDSDESEDEEDDYQQK.[R]	2xTMT6plex [N-Term; K17]; 1xPhospho [S4(100)]	7657441 1xPhospho [S60(99.6)]	0.000127991	0	1	1	29	7657441	7657441 [57-73]	0	2570.07	S4(Phospho): 100	3694.3	812	3156.3	4006.8	905	1600.9	2193.5	2314.1	3121.3	3646.5	47.78	56.14	48.97	55.22	50.74	56.01	47.03	39.56	49.71	63.35				4383.7	5010.8	1688.4	Unique	6.33098	High	0	0.0003911
High	[R].SKFDSDEEEEDTENVEAASSGK.[V]	3xTMT6plex [N-Term; K2; K22]; 1xPhospho [T/S]	1016841188 1xPhospho [S290(99.6)]	0.000198117	0	1	6	14	1016841188	1016841188 [286-307]	1	3170.45	S5(Phospho): 99.66	388.3	291.2	414.5	386.4	371.5	419.3	413.1	538.5	523.8	392.9	22.61	56.99	22.7	23.82	49.43	47.7	30.02	16.8	36.31	24.62				450.4	326.2		Unique	5.28279	High	0	0.0001931
High	[R].GGAPDPSPGATATPGAPAQPSSPDAR.[R]	1xTMT6plex [N-Term]; 1xPhospho [S/T]		0.000207317	0	1	2	9	1034608146	1034608146 [555-580]	0	2639.23	S22(Phospho): 99.41	200.5	667.6	607.1	1252.8	637.3	964.5	604.3	762.5	956.7	541.4		0.06	4.01	1.97	5.69	2.84	13.31	51.73	10.73	11.38							Unique	4.95291	High	0	0.0002056
High	[R].RPPSPDVIVLSDNEQPSSPR.[V]	1xTMT6plex [N-Term]; 2xPhospho [S4(100); S]	1034608313 2xPhospho [S119(100); S126(100)]	0.000194051	0	1	7	40	1034608313	1034608313 [116-135]	0	2579.21	S4(Phospho): 100; S11(Phospho): 100	1141.7	2083.5	2343.1	2165.9	2416.5	1550.9	1367.8	1724.9	2055.5	1981.3	82.1	82.85	81.04	82.37	89.33	78.47	78.72	79.55	80.7	82.31						195.3	Unique	5.07616	High	0	0.000188
High	[R].RPPSPDVIVLSDNEQPSSPR.[V]	1xTMT6plex [N-Term]; 1xPhospho [S4(100)]	1034608313 1xPhospho [S119(100)]	7.25945e-06	0	1	7	11	1034608313	1034608313 [116-135]	0	2499.24	S4(Phospho): 100	603.8	713.2	534.2	910.6	430.3	483	430.5	572.7	813.3	487.4	4.08	9.53	12.4	3.94	0.52	6.83	2.73	3.8	17.53	4.31				621.3	586.4		Unique	7.6821	High	0	6.783e-07
High	[R].NPSSAGSWNSGSSGPGSTGNR.[N]	1xTMT6plex [N-Term]; 1xPhospho [S7(100)]	4503689 1xPhospho [S294(100)]	0.000114895	0	1	2	18	4503689	4503689 [288-308]	0	2272.98	S7(Phospho): 100	243.2	159.4	377.8	177.5	278.7	241.7	234.9	336.2	227.2	245.4	58.77	25.31	61.28	48.9	57.86	62.42	98.35	94.45	67.09	44.71							Unique	5.13918	High	0	8.558e-05
High	[R].TQPDGTSVPGEPASPISQR.[L]	1xTMT6plex [N-Term]; 1xPhospho [S14(99.3)]	767968258 1xPhospho [S1775(100)]	9.19526e-05	0	1	4	33	767968258	767968258 [1762-1780]	0	2233.07	S14(Phospho): 100	2238	3678.5	3395.7	1932.1	4857	3901.2	1426.5	5978.3	2490.7	4539.7	4.51	13.55	8.57	20.55	17.24	4.73	16.04	15.55	12.81	14.25							Unique	5.57237	High	0	5.912e-05
High	[K].FTDKDQQPSGSEGEDDDAEAALKK.[E]	4xTMT6plex [N-Term; K4; K23; K24]; 1xPhospho [S/T]		0.00012101	0	1	1	29	1034595233	1034595233 [78-101]	2	3577.77	S9(Phospho): 100	2053.6	732.6	1925.7	1851.4	755.7	1129.3	1651.6	1097.8	1983.5	2107.9	114.82	114.43	114.44	117.87	114.44	110.02	119.21	113.93	115.34	119.29				386.3	3720.8		Unique	5.88223	High	0	9.282e-05
High	[K].EADDDEEVDDNIPEMPSPK.[K]	2xTMT6plex [N-Term; K19]; 1xOxidation [M15(100)]; 1xPhospho [S17(100)]	973353117 1xPhospho [S714(100)]	0.000305247	0	1	4	6	973353117	973353117 [698-716]	0	2699.17	M15(Oxidation): 100; S17(Phospho): 100	315.9	151.1	240.9	278.3	179.8	199.7	195.1	300.5	346.4	322.7	8.44	12.75	2.99	6.09	17.91	8.48	8.59	24.5	19.66	0.41				297	334.8		Unique	3.70556	High	0	0.0003266
High	[K].EADDDEEVDDNIPEMPSPK.[K]	2xTMT6plex [N-Term; K19]; 1xPhospho [S17(100)]	973353117 1xPhospho [S714(100)]	6.00531e-05	0	1	4	7	973353117	973353117 [698-716]	0	2683.17	S17(Phospho): 100	223.5	112.2	247.3	245.7	144.7	122.2	173.1	157.2	330.6	351.5	41.59	13.48	15.68	21.04	9.59	28.61	26.15	3.75	1.1	4.29				289.3	157.8		Unique	4.61327	High	0	2.82e-05
High	[K].SFNYSPNSSTSEVSSTSASK.[A]	2xTMT6plex [N-Term; K20]; 1xPhospho [S5(100)]	183396804 1xPhospho [S593(100)]	0.000251665	0	1	11	19	183396804	183396804 [589-608]	0	2605.21	S5(Phospho): 100	782.5	660.6	1416.8	877.7	575.5	420.8	978.6	830.5	752.8	1128.7	3.84	10.86	19.34	10.94	12.21	28.47	23.15	11.58	20.55	29.55				803.7	761.2		Unique	6.03217	High	0	0.0002625
High	[R].GLVAAYSGESDSEEEQER.[G]	1xTMT6plex [N-Term]; 1xPhospho [S12(100)]	325120986 1xPhospho [S801(99.8)]	0.000107446	0	1	11	23	325120986	325120986 [792-809]	0	2264.98	S10(Phospho): 100	441.5	450	552.8	565.9	534.2	464.3	398.4	682.7	693	516.8	24.9	22.58	21.18	12.87	26.73	17.84	16.9	32.16	20.09	17.52				394.1	567.2	363.2	Unique	5.19224	High	0	7.663e-05
High	[K].SPAVATSTAAPPPPSSPLPSK.[S]	2xTMT6plex [N-Term; K21]; 1xPhospho [S/T]		0.000135359	0	1	20	12	530365733	530365733 [450-470]	0	2498.33	S16(Phospho): 99.6	293.2	339.9	295.3	218.5	309.8	310.3	341.2	277.2	227.4	284.4	104.91	103.71	99.58	106.44	101.84	101.49	102.68	86.99	95.06	91.46				75.7		510.8	Unique	5.61353	High	0	0.0001177
High	[K].TTTYTQGVPPSQGDLEYQMSTTAR.[A]	1xTMT6plex [N-Term]; 1xPhospho [S11(100)]		0.000223593	0	1	2	11	1034599574	1034599574 [75-98]	0	2941.35	T21(Phospho): 49.89; T22(Phospho): 49.89	665.9	396.1	526.7	478.6	415.3	495.2	530.6	478.7	499.9	570.9																665.9	Unique	4.47236	High	9.533e-05	0.0004517
High	[K].ASESSSSEESSDDDDEEDQKKQPVQK.[G]	4xTMT6plex [N-Term; K20; K21; K26]; 1xPhospho [S]	530394600 1xPhospho [S128(99.1)]	0.000296733	0	1	4	22	530394600	530394600 [124-149]	2	3880.83	S5(Phospho): 99.24		1406.4	187.5	606	430	679.3	151.4	541.2	732.2	164.4		9.82	30.81	4.71	7.88	9.78	34.45	9.7	8.82	45.89							Unique	4.29105	High	0	0.0003879
High	[R].AGEEDEGEEDSDSDYEISAK.[A]	2xTMT6plex [N-Term; K20]; 1xPhospho [S11(100)]	41393547 1xPhospho [S473(100)]	0.000285094	0	1	5	11	41393547	41393547 [463-482]	0	2713.13	S11(Phospho): 100	457.2	534.9	297.7	558	722.9	535.4	394.1	688.5	469.6	273.9	67.55	78.29	80.58	63.82	65.4	76.48	70.11	71.06	69.64	69.22				675.6	238.8		Unique	3.92191	High	0	0.0003154
High	[R].VQNHLPASGPTQPPVVSSTNEGSPSPPEPTGK.[G]	2xTMT6plex [N-Term; K32]; 1xPhospho [S/T]		0.000246232	0	1	2	25	109638745	109638745 [170-201]	0	3731.87	S25(Phospho): 99.42	120.8	124.1	135.9	160.7	197.7	339.6	221.2	233.1	334.1	175.7	4.08	37.13	44.73	17.13	51.39	42.68	35.43	18.8	35.78	22.29				124.3	117.3		Unique	3.84561	High	0	0.0004214
High	[K].RSPYAGLQLGAAK.[K]	2xTMT6plex [N-Term; K13]; 1xPhospho [S2(100)]	767969923 1xPhospho [S104(100)]	0.000267993	0	1	3	5	767969923	767969923 [103-115]	1	1870.04	S2(Phospho): 100	699.6	962.8	630.1	287.8	276.4	262.1	3416.9	218	376	479.7	2.11	0.4	15.27	2.19	0.31	4.8	7.23	1.2	6.41	21.88				689.2	710		Unique	5.34147	High	0	0.000283
High	[K].QTSIQSPSSYGNSSPPLNK.[M]	2xTMT6plex [N-Term; K19]; 1xPhospho [S/Y/T]		0.000359691	0	1	9	21	31543818	31543818 [450-468]	0	2530.26	S14(Phospho): 100	1194.3	534.5	704.4	1833.4	202.3	450.2	1063.8	708.9	797.8	471.2	103.09	114.1	118.5	127.67	117.82	139.44	128.96	128.38	109.82	141.76				157.3	125.8		Unique	4.72634	High	0	0.0003808
High	[R].SPPGAAASAAAKPPPLSAK.[D]	3xTMT6plex [N-Term; K12; K19]; 1xPhospho [S1(100)]	116734704 1xPhospho [S71(100)]	0.000402288	0	1	2	8	116734704	116734704 [71-89]	0	2456.39	S1(Phospho): 100	845.3	208.4	570.4	246.2	908	412.7	377.9	198.6	502.3	360.9	13.77	19.47	8.34	5.18	21.66	11.63	10.78	14.5	14.2	15.55				763	927.5		Unique	3.84466	High	0.0001849	0.0004811
High	[R].SSSEESDSDREALAAMNAAQVKPLGK.[S]	3xTMT6plex [N-Term; K22; K26]; 1xPhospho [S]	530380671 1xPhospho [S484(99.2)]; 207113162 1xPhospho [S484(99.2)]; 530380673 1xPhospho [S484(99.2)]	0.000184198	0	3	19	34	530380671; 207113162; 530380673	530380671 [477-502]; 207113162 [477-502]; 530380673 [477-502]	1	3458.74	S8(Phospho): 97.49	960.1	1882.4	1677.1	4307.6	1156.5	1110.4	1267.5	2440.6	1061.5	716.5																960.1	Not Unique	4.96022	High	0.0002784	0.0005311
High	[R].DRSSPPPGYIPDELHQVAR.[N]	1xTMT6plex [N-Term]; 1xPhospho [S/Y]		0.000103343	0	1	1	26	85838511	85838511 [161-179]	1	2443.2	S3(Phospho): 50; S4(Phospho): 50	500.5	458.2	404.3	481.9	478.9	521.7	497.1	596.7	686.9	564.5	14.91	23.81	26.46	23.39	22.2	31.78	18.4	18.32	13.24	14.54				553.3	447.8		Unique	5.74542	High	0	7.192e-05
High	[K].YLAEDSNMSVPSEPSSPQSSTR.[T]	1xTMT6plex [N-Term]; 1xPhospho [S16(100)]	1034652093 1xPhospho [S569(100)]	7.85236e-05	0	1	3	24	1034652093	1034652093 [554-575]	0	2678.19	S16(Phospho): 100	646	199.9	300.6	326.4	230.5	284.1	319.5	333.5	343.5	295.7	3.29	2.55	28.4	4.35	12.35	18.29	7.6	13.96	10.14	18.7				631	661		Unique	4.85005	High	0	0.0001152
High	[R].KASVVDPSTESSPAPQEGSEQPASPASPLSSR.[Q]	2xTMT6plex [N-Term; K1]; 1xPhospho [S27(97)]	45597175 1xPhospho [S435(100)]	0.00014498	0	1	2	7	45597175	45597175 [409-440]	1	3718.82	S27(Phospho): 100	108.7	56.8	125.3	91.1	82.9	110.5	82	84.6	410.6	100.4														108.7			Unique	4.47821	High	0	0.000123
High	[R].QFTSSSSMKGSCGIGGGIGGGSSR.[I]	2xTMT6plex [N-Term; K9]; 1xPhospho [S/T]; 1xOxidation [M8(100)]; 1xCarbamidomethyl [C12]		0.000398253	0	2	2	25	15431310; 24430192	15431310 [7-30]; 24430192 [7-30]	1	2816.31	S4(Phospho): 49.35; S7(Phospho): 49.35; M8(Oxidation): 100	220.8	508	1039.8	964.8	304.9	387.2	2165.9	192	328.7	200	64.96	44.83	19.34	35.84	31.22	57.99	29.48	35.93	36.21	45.39				322.3	119.4		Not Unique	3.80307	High	0	0.0004124
High	[R].ESTGSYSDLYPDSDDSSEDQVENSK.[N]	2xTMT6plex [N-Term; K25]; 1xPhospho [S24(86.6)]	110347427 1xPhospho [S1469(98.1)]	0.000108614	0	1	1	9	110347427	110347427 [1457-1481]	0	3292.39	S13(Phospho): 98.08	469.6	333	221.6	380.8	199.9	306.2	298.1	515.1	369.4	262																469.6	Unique	5.47302	High	0	7.807e-05
High	[R].QFTSSSSMKGSCGIGGGIGGGSSR.[I]	2xTMT6plex [N-Term; K9]; 1xCarbamidomethyl [C12]; 1xPhospho [S/T]		0.000352112	0	2	2	6	15431310; 24430192	15431310 [7-30]; 24430192 [7-30]	1	2800.32	S6(Phospho): 49.62; S7(Phospho): 49.62	352.3	427.3	1158.9	910	478.2	580.5	2452	467.4	678.9	439																352.3	Not Unique	4.41127	High	0	0.000374
High	[K].SSSPAPADIAQTVQEDLR.[T]	1xTMT6plex [N-Term]; 1xPhospho [S3(99.6)]		0.000161634	0	1	1	81	1034643208	1034643208 [230-247]	0	2194.06	S3(Phospho): 99.73	1078.6	2891.1	2563.9	1586	2002.7	1652.6	1564.5	1382.1	1993.7	2547.6	85.63	58.82	72.23	57.8	64.57	66.41	61.29	70.65	56.9	39.12							Unique	5.76849	High	0	0.000248
High	[K].QDDSGSSSEESDSDGEAPAAVTSAQVIKPPLIFVDPNR.[S]	2xTMT6plex [N-Term; K28]; 1xPhospho [S13(99.4)]	530380671 1xPhospho [S941(99.4)]; 207113162 1xPhospho [S941(99.4)]	2.06949e-07	0	2	8	6	530380671; 207113162	530380671 [929-966]; 207113162 [929-966]	0	4454.13	S13(Phospho): 100	908.2	2232.4	1541.6	2955.2	713.1	1308.8	820.5	2568.6	2107.7	1151.2	82.65	78.79	89.38	86.65	65.44	84.71	91.15	89.29	82.71	114.68							Not Unique	9.24367	High	0	1.271e-09
High	[R].IQEQESSGEEDSDLSPEER.[EG]	1xTMT6plex [N-Term]; 1xPhospho [S]	613410235 1xPhospho [S122(99.6)]	7.61817e-05	0	1	5	32	613410235	613410235 [116-134]	0	2473.05	S7(Phospho): 100	769.9	579.5	845.5	835	529	932.2	655.4	779.6	1331.2	596.5	12.84	24.02	15.9	15.58	18.26	25.49	25.53	17.04	16.18	17.71		700	839.8				Unique	6.2425	High	0	4.279e-05
High	[K].HSVTAATPPPSPTSGESGDLLSNLLQSPSSAK.[L]	2xTMT6plex [N-Term; K32]; 2xPhospho [T7(100); S11(100)]	46049063 2xPhospho [T204(100); S208(100)]	1.47561e-05	0	1	5	8	46049063	46049063 [198-229]	0	3751.82	T7(Phospho): 100; S11(Phospho): 99.99	1196.6	2543.4	2587.9	1468	1814.3	1619	1310.9	1048.6	2185.9	1290.4	35.52	39.11	32.27	28.32	40.71	18.45	28.26	13.95	12.53	5.65							Unique	7.13323	High	0	2.368e-06
High	[K].SPVGKSPPSTGSTYGSSQK.[E]	3xTMT6plex [N-Term; K5; K19]; 1xPhospho [S6(100)]	1009287565 1xPhospho [S320(100)]	0.000355258	0	1	2	15	1009287565	1009287565 [315-333]	1	2619.36	S6(Phospho): 100	5526.4	2637.5	3468.5	4345.1	984.8	1263.4	1873.3	5048.1	2107.3	1261	15.32	17.59	19.38	16.31	22.58	19.28	20.31	19.11	15.06	18.24				6125.2	4927.6		Unique	5.16038	High	0.0002194	0.000483
High	[R].TQLWASEPGTPPLPTSLPSQNPILK.[N]	2xTMT6plex [N-Term; K25]; 1xPhospho [T10(100)]	530386029 1xPhospho [T551(100)]	2.49578e-05	0	1	10	4	530386029	530386029 [542-566]	0	3210.72	T10(Phospho): 100	2268.1	1950.1	2282.2	2286.2	1228.7	2290.1	1319.4	2182.3	2292.9	2054.5	57.4	53.22	56.76	54.65	40.77	42.39	53.32	55.17	45.34	50.92							Unique	6.25812	High	0	5.984e-06
High	[R].LSSTSSEETQLFHIPR.[V]	1xTMT6plex [N-Term]; 2xPhospho [S3(99.3); T/S]	260764009 2xPhospho [S818(99.1); S/T]	0.000349606	0	1	2	12	260764009	260764009 [813-828]	0	2221.01	S3(Phospho): 99.26; T4(Phospho): 50; S5(Phospho): 50	1352.6	1430.3	2985.3	1472.7	1170.7	3281.8	1282.5	1931.8	1556.7	4598.7	41.01	59.34	71.32	49.33	53.16	52.21	48.14	39.32	32.58	67.44							Unique	5.91187	High	0	0.0004152
High	[R].APQQQPPPQQPPPPQPPPQQPPPPPSYSPAR.[N]	1xTMT6plex [N-Term]; 1xPhospho [S/Y]		9.8755e-05	0	1	7	33	530415584	530415584 [691-721]	0	3637.82	S28(Phospho): 99.55	60.9	201.1	159.9	107.2	270.2	165.3	113.3	229.9	213.9	176	51.31	73.49	102.35	60.12	81.08	101.59	102.09	72.66	41.61	57.08				38.8			Unique	5.35209	High	0	6.673e-05
High	[R].FPGDQVVNGAGPELSTGPSPGSPTLDIDQSIEQLNR.[L]	1xTMT6plex [N-Term]; 1xPhospho [S22(100)]	767945696 1xPhospho [S806(100)]	0.00031862	0	1	8	2	767945696	767945696 [785-820]	0	4001.93	S22(Phospho): 99.98	290.6	172.4	153	146.8	189.5	222.7	95.5	298.7	246.2	680.6																	Unique	5.4488	High	0	0.0003408
High	[R].QFTSSSSIKGSSGLGGGSSR.[T]	2xTMT6plex [N-Term; K9]; 1xPhospho [S7(98.7)]	4557701 1xPhospho [S13(100)]	0.000261779	0	1	1	338	4557701	4557701 [7-26]	1	2425.21	S7(Phospho): 100	900.4	2621.7	1101.9	1488.7	1106.5	2209.3	8929.5	2196.2	1670.2	2666.6	200.81	202	213.1	201.95	202.62	198.59	201.07	187.91	210.58	197.71			80		168.4	4133	Unique	5.24618	High	0	0.0003174
High	[K].IEDVGSDEEDDSGKDK.[K]	3xTMT6plex [N-Term; K14; K16]; 1xPhospho [S6(100)]	20149594 1xPhospho [S255(100)]	0.000393571	0	1	3	259	20149594	20149594 [250-265]	1	2505.18	S6(Phospho): 100	143141	97609.2	150375	247563	95645.2	212680	282104	234833	302325	349365	18.4	19.21	10.88	30.95	18.11	19.14	23.98	36.24	27.46	31.55							Unique	5.18848	High	0.0002194	0.0004933
High	[R].SSQPSPTAVPASDSPPTKQEVK.[K]	3xTMT6plex [N-Term; K18; K22]; 1xPhospho [S14(100)]	78042577 1xPhospho [S125(100)]	0.000145914	0	1	6	9	78042577	78042577 [112-133]	1	3005.58	S14(Phospho): 100	405.8	352.3	323.5	1339.9	355.7	334.1	252.6	492.5	460.4	305.4	10.86	23.6	33.22	22.84	24.22	35.28	4.69	38.43	21.5	47.1		436.9	374.6				Unique	5.04546	High	0	0.0002009
High	[K].AQDPAAATASSPSTPDPASAPSTTPASPATPAQPSTSGSASSDAGSGSR.[R]	1xTMT6plex [N-Term]; 1xPhospho [S/T]		2.35268e-06	0	1	3	60	40538799	40538799 [88-136]	0	4720.13	S19(Phospho): 19.9; S22(Phospho): 19.9; T23(Phospho): 19.9; T24(Phospho): 19.9; S27(Phospho): 19.9	165.7		131.6	66.7	82.5	91.6		89.4	48.3	97.9				57.59	43	62.04											Unique	7.22475	High	0	9.264e-08
High	[R].DAHDVSPTSTDTEAQLTVER.[Q]	1xTMT6plex [N-Term]; 1xPhospho [S6(100)]	156766050 1xPhospho [S294(100)]	3.92199e-05	0	1	2	32	156766050	156766050 [289-308]	0	2481.13	S6(Phospho): 100	670.1	897.7	894.2	1787.7	605.4	1639.7	1479.4	910.3	956.7	814	23.81	16.39	18.29	11.23	25.13	21.91	5.23	22.86	23.81	25.61		557.3	782.9				Unique	6.50006	High	0	3.753e-05
High	[R].ETPHSPGVEDAPIAK.[V]	2xTMT6plex [N-Term; K15]; 1xPhospho [S5(100)]	767974553 1xPhospho [S491(100)]	0.000167208	0	1	5	42	767974553	767974553 [487-501]	0	2086.06	S5(Phospho): 100	473.4	6944.6	3868	6674.2	3102.5	3997.2	5113.8	4080.9	2296.3	2761.4	55.26	56.21	58.61	68.2	54.34	54.53	64.68	53.23	55.82	56.28		136					Unique	5.8342	High	0	0.0003307
High	[R].GSDPASGEVEASQLR.[R]	1xTMT6plex [N-Term]; 1xPhospho [S2(100)]	548923663 1xPhospho [S153(100)]	8.18174e-05	0	1	4	9	548923663	548923663 [152-166]	0	1811.84	S2(Phospho): 100	486.4	563.9	613.2	552	444.3	996.8	675.7	447.7	419.5	572.3	14.14	11.64	9.28	4.04	11.49	7.5	0.68	1.25	17.73	16.6		535	437.8				Unique	5.85539	High	0	4.835e-05
High	[R].KVTSPSSSSSSSSSDSESDDEADVSEVTPR.[V]	2xTMT6plex [N-Term; K1]; 1xPhospho [S/T]	768020849 1xPhospho [S164(99.6)]	9.59544e-06	0	1	2	17	768020849	768020849 [147-176]	1	3584.6	S18(Phospho): 100	321.4	99.5	198.1	41.9	92.4	258.1	134.9	119.6	157.8	156.3	102.18	70.67	107.71	42.23	97		107.08	90.75	109.06	90.92		89.2	553.5				Unique	5.95409	High	0	1.107e-06
High	[R].RSSQPSPTAVPASDSPPTK.[Q]	2xTMT6plex [N-Term; K19]; 2xPhospho [S6(99.6); S/T]		0.000433825	0	1	6	26	78042577	78042577 [111-129]	1	2528.22	S2(Phospho): 50; S3(Phospho): 50; S6(Phospho): 100	262.6	2024.9	1827.4	3642	1028.4	2412.3	858.9	783	2373.7	1600.2	136.09	111.13	112.45	112.57	106.17	112.37	103.43	101.24	112.03	111.29		55.7	56.8				Unique	5.21584	High	0	0.0004359
High	[K].QDDSGSSSEESDSDGEAPAAVTSAQK.[D]	2xTMT6plex [N-Term; K26]; 1xPhospho [S/T]	530380673 1xPhospho [S941(100)]	4.33222e-05	0	1	7	6	530380673	530380673 [929-954]	0	3093.34	S13(Phospho): 100	104.5	186.9	161.9	334	124	136.5	96.2	186.7	144	124																104.5	Unique	5.35281	High	0	1.585e-05
High	[K].QEDSESSEEESDSEEAAASPAQVK.[T]	2xTMT6plex [N-Term; K24]; 1xPhospho [S6(99.7)]	530380671 1xPhospho [S777(100)]; 207113162 1xPhospho [S777(100)]; 530380673 1xPhospho [S777(100)]	5.30189e-07	0	3	19	46	530380671; 207113162; 530380673	530380671 [759-782]; 207113162 [759-782]; 530380673 [759-782]	0	3077.34	S19(Phospho): 100	469.9	687.6	635.5	1529.6	783.8	819.5	492.6	838.2	1063.4	438.3	79.85	9.07	25.56	28.5	41.11	18.06	40.81	72.07	11.89	61.15		86.9	210.5	759.1	823		Not Unique	7.53434	High	0	6.691e-09
High	[R].RASNEKESAAPASPAPSPAPSPTPAPPQK.[E]	3xTMT6plex [N-Term; K6; K29]; 1xPhospho [S3(99.6)]	78042577 1xPhospho [S534(99.6)]	0.000156229	0	1	6	23	78042577	78042577 [532-560]	2	3605.89	S3(Phospho): 99.57	165.5	399.5	390.7	1080.3	255.9	562.1	234	451.8	732.1	299.6	60.49	67.87	84.97	100.82	67.03	80.57	81.63	80.44	84.16	73.58		236.3	94.7				Unique	5.74188	High	0	0.0001376
High	[K].AQDPAAATASSPSTPDPASAPSTTPASPATPAQPSTSGSASSDAGSGSR.[R]	1xTMT6plex [N-Term]; 2xPhospho [S11(99); S/T]		7.66776e-05	0	1	3	22	40538799	40538799 [88-136]	0	4800.1	S11(Phospho): 98.99; S13(Phospho): 49.99; T14(Phospho): 49.99			28.4																								Unique	4.46157	High	0	4.331e-05
High	[K].TRVSDPISTSESSEEEEEAEAETAK.[A]	2xTMT6plex [N-Term; K25]; 1xPhospho [S4(99.6)]	530380671 1xPhospho [S79(99.6)]; 207113162 1xPhospho [S79(99.6)]; 530380673 1xPhospho [S79(99.6)]	0.000256684	0	3	19	1	530380671; 207113162; 530380673	530380671 [76-100]; 207113162 [76-100]; 530380673 [76-100]	1	3249.49	S4(Phospho): 99.62	162.2	332.7	135.2	317.8	305	196.4	111.5	198.2	293.6	98.9																162.2	Not Unique	5.4476	High	0	0.0002689
High	[K].SKSEEAHAEDSVMDHHFR.[K]	2xTMT6plex [N-Term; K2]; 1xPhospho [S3(99.8)]		0.000107911	0	1	4	64	66346679	66346679 [328-345]	1	2650.21	S3(Phospho): 99.78	1380.5	1213	4489.7	1173.5	1188.2	1440.6	1286.5	700.9	1041.3	818.6	4.51	4.41	6.78	0.1	21.67	5.76	0.04	2.4	1.14	27.4		1424.5	1336.5				Unique	6.52104	High	0	7.71e-05
High	[R].ANSFVGTAQYVSPELLTEK.[S]	2xTMT6plex [N-Term; K19]; 1xPhospho [S3(100)]	1034594747 1xPhospho [S275(100)]	1.76193e-05	0	1	12	2	1034594747	1034594747 [273-291]	0	2592.34	S3(Phospho): 100	1538.6	940.9	1362.8	1729.2	995.1	1902.4	723.7	1282.3	1686.9	1517.9	6.8	15.8	13.54	13.32	14.48	13.93	14.22	9.35	4.75	21.29							Unique	6.8489	High	0	3.241e-06
High	[R].TDSREDEISPPPPNPVVK.[G]	2xTMT6plex [N-Term; K18]; 1xPhospho [S9(100)]	47132583 1xPhospho [S83(100)]	7.51996e-05	0	1	2	62	47132583	47132583 [75-92]	1	2515.28	T1(Phospho): 50; S3(Phospho): 50	1170.1	1086.8	1125.1	881.5	758.8	1265.4	697.7	1514.1	1686.2	1527	63.91	81.44	31.95	22.85	49.14	26.47	16.58	25.12	35.18	13.58		972	1010.2	2056	2104.5		Unique	6.29905	High	0	4.185e-05
High	[K].NKPGPNIESGNEDDDASFK.[I]	3xTMT6plex [N-Term; K2; K19]; 1xPhospho [S9(100)]	84043963 1xPhospho [S214(100)]	7.04755e-05	0	1	1	19	84043963	84043963 [206-224]	0	2801.36	S9(Phospho): 100	2898.3	822	3593.3	3115.7	956	1522.2	3579	1399.8	2640.3	2358.9	3.38	19.28	11.17	15	14.06	17.53	3.63	18.69	10.22	15.93		2829	2967.6				Unique	6.92004	High	0	8.649e-05
High	[R].FGGEHVPNSPFQVTALAGDQPSVQPPLR.[S]	1xTMT6plex [N-Term]; 1xPhospho [S9(100)]	160420317 1xPhospho [S1734(100)]	0.00023564	0	1	5	7	160420317	160420317 [1726-1753]	0	3254.62	S9(Phospho): 100	425.6	310.3	333.4	213.4	259.3	318.4	186.8	225	622.7	304.7	14.12	38.68	5.49	14.59	1.65	1.01	16.18	7.3	21.62	0.85							Unique	4.79305	High	0	0.0002423
High	[K].KEDSDEEEDDDSEEDEEDDEDEDEDEDEIEPAAMK.[A]	3xTMT6plex [N-Term; K1; K35]; 1xOxidation [M34(100)]; 1xPhospho [S4(100)]	55956788 1xPhospho [S145(100)]	0.000291705	0	1	1	14	55956788	55956788 [142-176]	1	4902.89	S4(Phospho): 100; M34(Oxidation): 100	2276.7	345.8	1064.8	1082.4	415.5	547.9	1597.2	937.9	627	1011.9																2276.7	Unique	5.77844	High	0.0004065	0.0006763
High	[K].KEDSDEEEDDDSEEDEEDDEDEDEDEDEIEPAAMK.[A]	3xTMT6plex [N-Term; K1; K35]; 1xPhospho [S4(96.7)]	55956788 1xPhospho [S145(100)]	4.5798e-06	0	1	1	1	55956788	55956788 [142-176]	1	4886.9	S4(Phospho): 100	638.9	31	227.6	250.4	67.9	77.3	345.5	196.1	94.9	262																638.9	Unique	9.17637	High	0	3.005e-07
High	[K].DQSPPPSPPPSYHPPPPPTK.[K]	2xTMT6plex [N-Term; K20]; 2xPhospho [S3(100); S7(100)]	112734870 2xPhospho [S728(100); S732(100)]	0.000363515	0	1	4	59	112734870	112734870 [726-745]	0	2738.3	S3(Phospho): 100; S7(Phospho): 100	1080.9	1322.3	1463.9	1220.4	1221.6	1115	957.4	903.8	1185.7	1589.3	76.75	79.12	73.83	73.94	72.93	67.12	77.04	57.18	64.2	69.76		1808	1786.9	438.8	290		Unique	5.1395	High	0	0.0003845
High	[K].DQSPPPSPPPSYHPPPPPTK.[K]	2xTMT6plex [N-Term; K20]; 1xPhospho [S3(99.7)]	112734870 1xPhospho [S728(99.7)]	0.000210319	0	1	4	29	112734870	112734870 [726-745]	0	2658.34	S3(Phospho): 50; S7(Phospho): 50	1285	1158.5	1008.1	1243.3	1350.2	1333.9	692.8	1317	922.6	1004.4	28.42	10.02	5.2	5.74	14.71	1.34	7.15	5.09	8.87	2.43							Unique	4.3703	High	0	0.0003526
High	[K].SKPIPIMPASPQK.[G]	3xTMT6plex [N-Term; K2; K13]; 1xPhospho [S10(100)]	510937025 1xPhospho [S629(100)]	0.000396243	0	1	13	9	510937025	510937025 [620-632]	0	2161.24	S10(Phospho): 100	626.1	605.7	844.7	518.4	354.2	726.3	587.6	352.5	941.2	725.1	14.52	0.34	10.86	11.65	3.81	5.59	2.16	11.16	1.22	34.65		561.8	690.3				Unique	4.78206	High	0	0.0004112
High	[R].KPLAAPGDGEGLGQTAQPSPPAR.[D]	2xTMT6plex [N-Term; K1]; 1xPhospho [S19(100)]	1034586858 1xPhospho [S905(99.4)]	3.28465e-05	0	1	6	6	1034586858	1034586858 [887-909]	0	2753.44	S19(Phospho): 100	160.1	191.8	149.9	153.6	190.4	169.5	210.1	139.5	226.2	165.7	61.46	3.1	22.33	28.09	24.93	10.96	15.87	20.7	55.68	10.44		229.6	90.5				Unique	5.4853	High	0	9.739e-06
High	[R].VAGEAAETDSEPEPEPEPTAAPR.[D]	1xTMT6plex [N-Term]; 1xPhospho [S/T]	47086495 1xPhospho [S65(100)]	5.02942e-05	0	1	1	25	47086495	47086495 [56-78]	0	2659.2	S10(Phospho): 99.67	350.8	405.7	433.7	382.4	527.9	488.9	372.8	489.2	513.4	435.8	44.37	50.92	36.54	58.2	46.3	20.69	26.27	41.83	30.51	46.48		240.8	460.9				Unique	4.63292	High	0	2.062e-05
High	[R].TSADAQEPASPVVSPQQSPPTSPHTWR.[K]	1xTMT6plex [N-Term]; 1xPhospho [S10(92.9)]		0.000176261	0	1	11	13	190886435	190886435 [153-179]	0	3167.5	S18(Phospho): 100	84.8	101.1	106.2	140.4	51.8	128.1	153	117.7	177	83.8	55.76	59.41	72.66	59.97	30.08	64.89	49.07	75.64	84.17	66.95		75.8		135.9	42.6		Unique	4.33972	High	0	0.0001643
High	[K].VSTLAGPSSDDENEEESKPEKEDEPQEDAK.[E]	4xTMT6plex [N-Term; K18; K21; K30]; 1xPhospho [S8(99)]		0.00033663	0	1	8	12	612339310	612339310 [624-653]	1	4286.05	S8(Phospho): 99.03	315.7	257.8	138.6	386.6	115.9	171.9	156.4	171.3	212	249.8		71.66	102.34	88.56	63.53	77.02	99.95	67.93	71.96				315.7				Unique	3.70397	High	0	0.0003595
High	[R].SLDGAEFSRPASVSENHDAGPDGDKRDEDGESGGQR.[S]	2xTMT6plex [N-Term; K25]; 1xPhospho [S1(100)]	768016461 1xPhospho [S455(100)]	0.000209028	0	1	15	4	768016461	768016461 [455-490]	2	4282.93	S1(Phospho): 100	89.1	85.8	108.3	58.9	45.7	65.8	45.5	55.8	216.2	61.1	11	59.12	46.05	19.55	29.82	20.49	15.92	26.18	59.36	15.22		95.9	77.9			93.6	Unique	6.79587	High	0	0.0002078
High	[K].SVPNTPLRPNQQSVVNSSFSELFVK.[F]	2xTMT6plex [N-Term; K25]; 1xPhospho [S1(100)]	190194412 1xPhospho [S1842(100)]	0.000206042	0	1	4	2	190194412	190194412 [1842-1866]	0	3312.74	S1(Phospho): 100	489.1	218.4	431.8	193	1594.2	479.9	213.1	246	183	335.1	11.54	14.01	27.3	27.08	22.1	32.06	6.35	21.81	35.92	10.27							Unique	5.03246	High	0	0.0002036
High	[R].QEIESETTSEEQIQEEK.[S]	2xTMT6plex [N-Term; K17]; 1xPhospho [T/S]		0.000394238	0	1	2	42	21361116	21361116 [2108-2124]	0	2575.21	S9(Phospho): 99.63	1992	1882.7	392.1	1020.7	455.8	1383.2	1759.6	1162.8	1140.1	464.6	85.4	73.41	75.33	84.36	73.54	78.39	50.48	80.87	70.5	79.4		3488.9	3441.2				Unique	4.98621	High	0.0002194	0.0005038
High	[K].GPRTPSPPPPIPEDIALGK.[K]	2xTMT6plex [N-Term; K19]; 2xPhospho [T4(100); S6(100)]	530402194 2xPhospho [T263(100); S265(100)]	7.50371e-05	0	1	5	7	530402194	530402194 [260-278]	1	2557.32	T4(Phospho): 100; S6(Phospho): 100	751.9	1487.2	932.4	1446.5	1476.7	950.9	636.4	1175.1	1638.9	1308.6	2.13	10.57	12.91	15.02	26.34	13.57	15.23	20.31	32.14	39.41							Unique	6.5905	High	0	4.174e-05
High	[K].TPLDLFAHFGPEPGDHSDPLPPSAPSPTR.[E]	1xTMT6plex [N-Term]; 1xPhospho [S/T]		1.48104e-06	0	1	3	5	530365132	530365132 [167-195]	0	3361.61	S26(Phospho): 50; T28(Phospho): 50	588.7	562.5	761.9	500.8	270.8	390.6	368.6	392.4	623.5	430.1	17.2	24.1	16.4	11.31	6.48	9.26	3.57	40.49	1.23	22.6							Unique	8.5909	High	0	4.099e-08
High	[R].RAPSPDGFSPYSPEETNR.[R]	1xTMT6plex [N-Term]; 1xPhospho [S4(100)]	153945765 1xPhospho [S292(100)]	0.000419301	0	1	3	4	153945765	153945765 [289-306]	1	2316.05	S4(Phospho): 100	183.3	458.6	259.8	357.3	337.8	264.7	198	318.2	278.7	294	9.91	15.11	12.87	14.45	9.65	20.08	6.74	10.2	1.61	12.29		196.2	170.5				Unique	4.64072	High	0	0.0004267
High	[R].SRTSVQTEDDQLIAGQSAR.[A]	1xTMT6plex [N-Term]; 2xPhospho [T/S]		0.000321577	0	1	23	13	1022434686	1022434686 [652-670]	1	2451.11	T3(Phospho): 49.89; S4(Phospho): 49.89; T7(Phospho): 100	276.1	305.7	256	259.2	342.7	454.1	207.2	295.8	313.5	887.8	23.82	52.85	43.72	44.34	40.22	66.23	39	51.43	42.73	78.7		249.7	195.7	322.3	336.9		Unique	5.85622	High	0	0.000344
High	[R].SRTSVQTEDDQLIAGQSAR.[A]	1xTMT6plex [N-Term]; 1xPhospho [T/S]		0.000378384	0	1	23	5	1022434686	1022434686 [652-670]	1	2371.15	T3(Phospho): 50; S4(Phospho): 50	157	345.8	206	199.5	271.8	220.9	154.8	196.7	202.6	426.4																157	Unique	5.58915	High	0	0.0003973
High	[R].LLEGEDAHLSSQQASGQSYSSR.[E]	1xTMT6plex [N-Term]; 1xPhospho [S10(99.7)]	24430192 1xPhospho [S429(99.7)]	0.000266429	0	1	1	19	24430192	24430192 [420-441]	0	2659.22	S18(Phospho): 99.62	138.6	111.3	119.3	257.2	138	214.1	311.8	117.5	227.7	118.7	38.68	36.9	31.21	34.94	25.11	54.29	27.88	28.72	39.34	31.76		144.9	82.1				Unique	4.21006	High	0	0.0002807
High	[R].SGGGDLTLGLEPSEEEAPR.[S]	1xTMT6plex [N-Term]; 1xPhospho [S1(100)]	54792096 1xPhospho [S1054(100)]	5.7139e-05	0	1	3	2	54792096	54792096 [1054-1072]	0	2223.04	S1(Phospho): 100	189.6	494.3	267.1	140.8	454.5	183.7	747.4	138.4	228.5	260																189.6	Unique	6.62725	High	0	2.58e-05
High	[R].TVSLGAGAKDELHIVEAEAMNYEGSPIK.[V]	3xTMT6plex [N-Term; K9; K28]; 1xPhospho [S25(100)]	10835063 1xPhospho [S70(100)]	5.30189e-07	0	1	4	3	10835063	10835063 [46-73]	1	3696.92	S25(Phospho): 100	174	232.8	351.3	345	173.2	322.4	236.7	280.4	226.4	356.6	31.43	31.98	40.88	25.73	35.37	32.23	30.26	39.28	30.49	50.49							Unique	8.35466	High	0	6.699e-09
High	[R].EESEEEEDEDDEEEEEEEKEK.[S]	3xTMT6plex [N-Term; K19; K21]; 1xPhospho [S3(100)]	1034651579 1xPhospho [S32(100)]	0.000127441	0	1	2	3	1034651579	1034651579 [30-50]	1	3410.41	S3(Phospho): 100	713.4	40.5	286.7	306.4	155.7	170.3	529.6	351	261.2	509.4	81.76	48.88	67.57	69.29	76.76	78.98	88.32	80.38	60.1	82.15		1125.8	301				Unique	5.80986	High	0	0.0001615
High	[R].SPSPVPQEEHSDPEMTEEEKEYQMMLLTK.[M]	3xTMT6plex [N-Term; K20; K29]; 2xPhospho [S3(99.5); S11(100)]	1016841188 2xPhospho [S313(99.5); S321(100)]	0.000388917	0	1	6	3	1016841188	1016841188 [311-339]	1	4266.95	S3(Phospho): 99.49; S11(Phospho): 100	341	987.3	504.3	1593.1	782.1	883.4	392.5	1490.6	1197	821.9	86.94	92.41	70.94	102.5	93.97	108.5	84.12	102.01	101.22	103.55							Unique	5.03688	High	0	0.0004055
High	[R].KNSSTDQGSDEEGSLQK.[E]	3xTMT6plex [N-Term; K1; K17]; 1xPhospho [S9(100)]	101943240 1xPhospho [S1068(100)]	6.0706e-05	0	1	3	9	101943240	101943240 [1060-1076]	1	2577.26	S9(Phospho): 100	2026.1	672.1	617.7	1336	602.5	1046.6	484.1	2055.3	1573.1	929.8	22.23	15.44	8.46	31.51	6.87	12.03	14.18	25.28	12.84	0.13		1707.6	2344.6				Unique	5.93421	High	0	2.877e-05
High	[K].QQPVESSEDSSDESDSSSEEEK.[K]	2xTMT6plex [N-Term; K22]; 1xPhospho [S]		1.59509e-05	0	1	4	33	530394600	530394600 [327-348]	0	2953.24	S17(Phospho): 49.93; S18(Phospho): 49.93	141.2	981.2	105.6	450	946.7	312.8	200.9	502.9	476.5	111.9	90.82	44.74	60.23	39.84	35.75	66.73	51.48	44.46	65.06	102.61		231.8	50.5				Unique	6.08968	High	0	6.475e-06
High	[K].QPATPTAAESSEGEGEEGDDGGETESR.[E]	1xTMT6plex [N-Term]; 1xPhospho [S10(99.5)]	18426902 1xPhospho [S91(99.5)]	1.22518e-05	0	1	4	14	18426902	18426902 [82-108]	0	3002.22	S10(Phospho): 99.52	48.7	23.2	61.8	48	108.1		77.2	144	112.1	62.7	0.92		39.54	47.15	20.02		24.47	36.21	10.09	22.31		49	48.4				Unique	5.37579	High	0	1.709e-06
High	[R].QSHSGSISPYPK.[V]	2xTMT6plex [N-Term; K12]; 1xPhospho [S/Y]		0.000354627	0	1	2	11	118572613	118572613 [987-998]	0	1825.92	S8(Phospho): 100	283.5	679.4	1056.6	353.8	902.8	667.6	411.5	235.4	540	639.6	35.39	24.67	20.34	42.06	23.81	21.45	20.67	60.61	25.14	22.96		354.5	212.6				Unique	5.11506	High	0	0.0003763
High	[K].LVTSGAESGNLNTSPSSNQTR.[N]	1xTMT6plex [N-Term]; 1xPhospho [S14(100)]	530399758 1xPhospho [S523(100)]	3.56599e-05	0	1	5	1	530399758	530399758 [510-530]	0	2429.15	S14(Phospho): 100	52.2	60.2	60.9	72.1	72.1	62.6	95.5	80.5	71.8	97.1																	Unique	5.09868	High	0	1.127e-05
High	[R].SAGEEEDGPVLTDEQK.[S]	2xTMT6plex [N-Term; K16]; 1xPhospho [S1(100)]	507834119 1xPhospho [S332(100)]	0.000364795	0	1	6	1	507834119	507834119 [332-347]	0	2242.05	S1(Phospho): 100	145.3	113.4	122.3	157.1	179.1	196.3	235.9	173.8	251.1	237.1																	Unique	4.82941	High	0	0.0003858
High	[K].SEAAAPHTDAGGGLSSDEEEGTSSQAEAAR.[I]	1xTMT6plex [N-Term]; 1xPhospho [S/T]	224809295 1xPhospho [S884(99.6)]	0.00038429	0	1	1	7	224809295	224809295 [869-898]	0	3197.37	S16(Phospho): 99.55	46.3	43.4	36.5	80.5	46.3	82		57.7	61.9	40.5		3.26	11.92		31.66	1.09		44.39	52.56				46.3				Unique	3.4126	High	0	0.0004018
High	[K].LLEENETEAVTVPTPSPTPVR.[S]	1xTMT6plex [N-Term]; 1xPhospho [S16(99.6)]	32171238 1xPhospho [S414(99.6)]	0.000282371	0	1	1	2	32171238	32171238 [399-419]	0	2588.31	S16(Phospho): 99.6	35.3	44.6	61.1	125.7	108.8	46.3	38.2	63.2	71.3	126.1																	Unique	5.03962	High	0	0.0003001
High	[R].QGSITSPQANEQSVTPQR.[R]	1xTMT6plex [N-Term]; 1xPhospho [T/S]	118572613 1xPhospho [T866(100)]	0.000252663	0	1	2	24	118572613	118572613 [852-869]	0	2237.08	T15(Phospho): 100	511.4	203.6	288.3	302.2	281.8	234.4	211.8	374.8	227.4	312.9	126.22	63.72	117.99	106.34	85.81	80.47	114.6	109.76	75.41	88.73		55.7					Unique	5.30392	High	0	0.000264
High	[R].AASDGQYENQSPEATSPR.[S]	1xTMT6plex [N-Term]; 1xPhospho [S3(100)]	1034616234 1xPhospho [S1016(100)]	0.000183813	0	1	20	13	1034616234	1034616234 [1014-1031]	0	2216.97	S3(Phospho): 100	161.5	233.2	81.5	91.6	155.5	267.5	113.4	158.2	184.2	133	25.8	97.76	51.34	55.65	59.81	83.41	52.36	43.76	68.06	31.2		218.5	141	122.3	164.2		Unique	5.56594	High	0	0.0001745
High	[R].EDPQARPLEGSSSEDSPPEGQAPPSHSPR.[G]	1xTMT6plex [N-Term]; 1xPhospho [S]		3.07166e-05	0	1	3	21	101943240	101943240 [1830-1858]	0	3350.51	S27(Phospho): 99.55	480.8	458.6	414.1	469	367	526.6	202.6	649.1	733.7	594.9	1.52	3	26.36	5.3	2.12	17.79	35.5	12.51	15.89	22.76		486	475.7				Unique	5.65725	High	0	3.038e-05
High	[R].TEAPGTPEGPEPERPSPGDGNPR.[E]	1xTMT6plex [N-Term]; 1xPhospho [S16(100)]	530378662 1xPhospho [T30(100)]	0.00031921	0	1	2	15	530378662	530378662 [25-47]	0	2653.21	T6(Phospho): 100	375.2	300.5	230.8	172.3	847.4	405.6	199.7	328.1	511.8	274.2	17.09	58.17	21.6	9.31	60.29	60.92	38.85	57.79	51.43	53.92		432.5	427.3	333.9	307		Unique	4.75119	High	0	0.0003414
High	[K].KDDSHSAEDSEDEKEDHK.[N]	4xTMT6plex [N-Term; K1; K14; K18]; 1xPhospho [S]	56118310 1xPhospho [S75(100)]	5.44485e-06	0	1	2	23	56118310	56118310 [70-87]	2	3097.48	S10(Phospho): 100	954.5	324.1	822.6	739.9	628.1	492.1	464.4	1048.3	686.5	889.7	77.37	67.82	91.24	95.48	72.47	82.07	96.21	93	71.86	94.8		463.7		596	1803.9		Unique	7.50674	High	0	4.074e-07
High	[R].TDADSESDNSDNNTIFVQGLGEGVSTDQVGEFFK.[Q]	2xTMT6plex [N-Term; K34]; 1xPhospho [S5(99.6)]	21327701 1xPhospho [S226(99.6)]	6.56211e-05	0	1	3	8	21327701	21327701 [222-255]	0	4160.89	S5(Phospho): 100	2640.5	2341.6	1969.3	1482.7	2636.6	2133.1	1051.5	1587.7	1959.6	1510.4	3.85	3.2	15.29	2.45	9.43	2.72	22.62	0.64	2.14	13.57							Unique	5.97928	High	0	0.0001756
High	[R].GGGGGGYGSGGSSYGSGGGSYGSGGGGGGGR.[G]	1xTMT6plex [N-Term]; 1xPhospho [S12(99.2)]	119395750 1xPhospho [S530(99.2)]	7.46644e-06	0	1	2	2	119395750	119395750 [519-549]	0	2693.08	S12(Phospho): 99.2	71.3	38.1	57.4		23.2	41.4	140.8		34.7	37.7												71.3					Unique	6.3929	High	0	7.124e-07
High	[R].SEDESETEDEEEKSQEDQEQKR.[K]	3xTMT6plex [N-Term; K13; K21]; 1xPhospho [S5(100)]	394582093 1xPhospho [S717(100)]	0.000267471	0	1	2	9	394582093	394582093 [713-734]	2	3451.55	S5(Phospho): 100	823.4	394.1	967.9	1219.8	725.9	777.2	852.4	1872	1029.9	2125	28.47	33.05	21.14	25.48	24.77	24.98	32.93	25.25	35.03	31.12		657.6	989.2				Unique	4.44603	High	0	0.0003425
High	[K].REEDSQSSSEESDSEEEAPAQAKPSGK.[A]	3xTMT6plex [N-Term; K23; K27]; 1xPhospho [S14(100)]	530380671 1xPhospho [S419(100)]; 207113162 1xPhospho [S419(100)]; 530380673 1xPhospho [S419(100)]	1.10604e-06	0	3	19	12	530380671; 207113162; 530380673	530380671 [406-432]; 207113162 [406-432]; 530380673 [406-432]	1	3661.7	S14(Phospho): 100	80.4	595.7	297.5	1038.1	295.2	472.3	247.2	675.8	579.4	173.9	47.34	70.99	68.01	68.08	67.48	79.84	80.21	67.26	53.64	107.08		53.5	107.3				Not Unique	6.97529	High	0	2.448e-08
High	[K].STSAPQMSPGSSDNQSSSPQPAQQK.[L]	2xTMT6plex [N-Term; K25]; 1xPhospho [S/T]	530365733 1xPhospho [S478(94.4)]	7.95491e-05	0	1	20	79	530365733	530365733 [471-495]	0	3070.42	S8(Phospho): 100	310.8	212	360.5	313.1	288.7	186.9	501.7	218.2	247.2	290.6	65.75	32.59	45.86	28.68	74.18	54.64	12.32	62.49	65.18	58.56						402.9	Unique	5.97539	High	0	4.608e-05
High	[R].ENPPVEDSSDEDDKR.[N]	2xTMT6plex [N-Term; K14]; 1xPhospho [S8(100)]	30578410 1xPhospho [S498(100)]	0.000279667	0	1	4	81	30578410	30578410 [491-505]	1	2270.02	S8(Phospho): 100	6533.9	3436.6	2407.2	4932	5605	5151.5	2992.1	5997.5	3594.1	2914.4	8.63	12.92	9.08	11.03	10.37	11.54	14.07	11.88	9.8	11.53		6135	6932.8				Unique	5.38792	High	0	0.0002967
High	[K].AASSSSSSSSSSSSDDSEEEK.[A]	2xTMT6plex [N-Term; K21]; 1xPhospho [S]	530394600 1xPhospho [S218(99.2)]	6.57632e-05	0	1	4	63	530394600	530394600 [215-235]	0	2576.08	S17(Phospho): 100	258.2	1420.2	124	296.1	1019.2	202.8	143.3	261.5	275.4	211.1		33.74	73.92	99.84	31.1	112	82.04	112.26	55.45							258.2	Unique	5.74976	High	0	4.928e-05
High	[R].RQQDPSPGSNLGGGDDLK.[L]	2xTMT6plex [N-Term; K18]; 1xPhospho [S6(100)]	13124881 1xPhospho [S173(100)]	0.000287835	0	1	3	9	13124881	13124881 [168-185]	1	2379.17	S6(Phospho): 100	549.6	740.1	860.6	532.4	774.3	907.1	542.1	796.5	1688	536.8	35.27	24.41	24.48	34.19	26.85	24.61	12.94	14.87	20.86	17.9		686.6	412.5				Unique	4.67773	High	0	0.0003064
High	[R].SQNIVTDSSSLSAEAIR.[Q]	1xTMT6plex [N-Term]; 1xPhospho [S/T]	112382250 1xPhospho [S1557(100)]	0.000300685	0	1	3	11	112382250	112382250 [1548-1564]	0	2087.02	S10(Phospho): 100	358	168.2	154.1	188	197.2	271.8	126.5	221.7	268.3	241.9	69.92	25.21	10.83	22.1	22.55	7.11	35.49	15.21	31.3	30.49		535	181				Unique	4.27315	High	0	0.0003209
High	[R].SVNEDDNPPSPIGGDMMDSLISQLQPPPQQQPFPK.[Q]	2xTMT6plex [N-Term; K35]; 2xOxidation [M16(100); M17(100)]; 1xPhospho [S10(97.5)]	28558973 1xPhospho [S986(100)]	0.000345248	0	1	2	4	28558973	28558973 [977-1011]	0	4374.07	S10(Phospho): 100; M16(Oxidation): 100; M17(Oxidation): 100	816.8	1318.3	1783.8	2233.4	1438.9	2592.1	1382.2	3276.7	3555.8	2104.1																	Unique	4.66499	High	0	0.0003675
High	[K].KSPVGKSPPSTGSTYGSSQK.[E]	4xTMT6plex [N-Term; K1; K6; K20]; 1xPhospho [S7(100)]	1009287565 1xPhospho [S320(100)]	4.5828e-05	0	1	2	6	1009287565	1009287565 [314-333]	2	2976.62	S7(Phospho): 100	1893.2	1468.5	1215.6	1533.5	374.3	500.3	605.4	1935.4	862.7	448.1	44.42	45.73	46.26	56.7	30.47	45.11	35.05	34.66	39.31	30.88		2487.9	1298.6				Unique	6.52492	High	0	1.752e-05
High	[K].SKEFVSSDESSSGENK.[S]	3xTMT6plex [N-Term; K2; K16]; 1xPhospho [S]		0.000111952	0	1	2	22	1034575062	1034575062 [796-811]	1	2484.21	S10(Phospho): 50; S11(Phospho): 50	1185.3	2235.2	4209.9	3408.3	707.1	1058.9	2330.3	1991.7	2981.8	610.7	0.71	8.22	1.82	8.16	5.18	10.44	6.93	2.5	1.95	5.92		1179.3	1191.3				Unique	5.49356	High	0	8.195e-05
High	[R].YSPSQNSPIHHIPSR.[R]	1xTMT6plex [N-Term]; 2xPhospho [S2(99.7); S/Y]	117938254 2xPhospho [S285(99.8); S/Y]; 7661958 2xPhospho [S285(99.8); S/Y]	0.000393571	0	2	8	49	117938254; 7661958	117938254 [284-298]; 7661958 [284-298]	0	2108.95	S2(Phospho): 100; S7(Phospho): 100	845.5	977.8	1409	1421.7	1266.6	1235.1	1131.9	1964.5	1667.2	1338.3	85.57	84.95	88.62	83.07	84.47	85.46	79.25	82.53	87.35	81.4		925.2	1525.9				Not Unique	5.42333	High	0	0.0004363
High	[K].KASSSDSEDSSEEEEEVQGPPAK.[K]	3xTMT6plex [N-Term; K1; K23]; 1xPhospho [S3(100)]	530394600 1xPhospho [S84(100)]	1.09013e-05	0	1	4	59	530394600	530394600 [82-104]	1	3189.49	S3(Phospho): 100	154.1	1166.2	251.6	453.1	922.5	624.4	248.5	696.3	673.7	314.3	49.48	102.86	78.55	91.85	94.86	99.98	80.67	95.78	98.73	71.33		207.3		79.6			Unique	8.14285	High	0	2.918e-06
High	[K].ASTTSLSGSDSETEGK.[Q]	2xTMT6plex [N-Term; K16]; 1xPhospho [S9(99.7)]	24307983 1xPhospho [S53(99.7)]	0.000250671	0	1	2	32	24307983	24307983 [45-60]	0	2094.98	S9(Phospho): 100	970.7	1226.1	754.6	965	778	839	644.3	1218.2	952.9	498.3	88.88	100.17	83.95	93.58	91.72	88.34	101.95	106.96	93.09	97.06		1857	1963.7	481.5	296.4		Unique	5.11468	High	0	0.0002613
High	[K].SSPGQPEAGPEGAQERPSQAAPAVEAEGPGSSQAPR.[K]	1xTMT6plex [N-Term]; 1xPhospho [S]		5.05122e-05	0	1	2	5	1034556295	1034556295 [18-53]	0	3793.76	S1(Phospho): 99.47		49.1	47	75.4		53	53.1	49.5	80.9	38.8		56.02		19.29		51.36	12.56		29.77	39.8							Unique	5.66439	High	0	2.852e-05
High	[K].EKTPSPKEEDEEPESPPEK.[K]	4xTMT6plex [N-Term; K2; K7; K19]; 1xPhospho [S/T]		8.39685e-05	0	1	2	21	56118310	56118310 [200-218]	2	3178.62	T3(Phospho): 100	351.5	2832.9	984.9	621	1854.7	466.4	465.5	830.7	618.7	403.7	70.97	108.28	100.73	84.55	94.95	83.88	89.39	38.44	78.64	81.86		503.8	616.7	87.4	198.3		Unique	6.19162	High	0	5.072e-05
High	[R].LLKPGEEPSEYTDEEDTKDHNKQD.[-]	4xTMT6plex [N-Term; K3; K18; K22]; 1xPhospho [T12(100)]	291621647 1xPhospho [T235(100)]	0.000438711	0	1	1	1	291621647	291621647 [224-247]	2	3813.89	T12(Phospho): 100	20.2	20.5	23.2	24.7	20.1	28.7	30.1	23.9	21.9	22.1																	Unique	4.52354	High	0	0.0004387
High	[R].TASRPDDIPDSPSSPK.[V]	2xTMT6plex [N-Term; K16]; 1xPhospho [S14(100)]		0.000445724	0	1	12	14	1034650743	1034650743 [1288-1303]	0	2208.09	S11(Phospho): 100	167.5	397.1	308.7	149.7	557.4	182	501.4	156.9	216.9	233.6	88.93	50.13	92.44	50.48	64.73	65.96	67.26	48.28	59	67.06		387.9	128.4				Unique	5.15349	High	0	0.0004425
High	[K].TGEDEDEEDNDALLKENESPDVR.[R]	2xTMT6plex [N-Term; K15]; 1xPhospho [S19(100)]	767997965 1xPhospho [S567(100)]	0.00042343	0	1	4	7	767997965	767997965 [549-571]	1	3157.41	S19(Phospho): 100	455.6	356.9	340	413.2	200.6	291.3	305.7	454.7	436.9	319.2	21.21	22.32	36.42	27.97	80.26	44.06	32.29	30.33	29.83	36.96		523.9	387.3				Unique	4.00859	High	0	0.0004294
High	[R].SHSVPENMVEPPLSGR.[V]	1xTMT6plex [N-Term]; 1xPhospho [S3(99.7)]	767980223 1xPhospho [S1253(99.6)]	0.000204773	0	1	7	9	767980223	767980223 [1251-1266]	0	2044.97	S3(Phospho): 99.74	755.1	428.9	520	400.1	447.4	574.1	311.9	365	480.3	542.2	17.83	13.56	36.6	17.58	18.18	15.16	22.11	4.75	20.82	14.36		659.9	850.3				Unique	5.1911	High	0	0.0003057
High	[K].LQEEGGGSDEEETGSPSEDGMQSAR.[T]	1xTMT6plex [N-Term]; 1xOxidation [M21(100)]; 1xPhospho [S8(100)]	5902034 1xPhospho [S50(100)]	4.8374e-05	0	1	1	3	5902034	5902034 [43-67]	0	2907.17	S8(Phospho): 100; M21(Oxidation): 100		46.8		76.3	48.9	41.2	27	52.6	94.1	34.7		29.32		27.6		30.77	4.23		70.48								Unique	5.12884	High	0	1.924e-05
High	[K].ETSVSKEDTDHEEKASNEDVTK.[A]	4xTMT6plex [N-Term; K6; K14; K22]; 1xPhospho [S16(99.4)]	19923653 1xPhospho [S129(99.4)]	0.000386931	0	1	4	4	19923653	19923653 [114-135]	2	3474.73	S16(Phospho): 99.39	254.3	327.3	336.4	318.9	232.8	603.9	211.4	640.6	495.3	201.4	106.71	115.32	111.91	114.77	99.12	106.21	112.21	115.95	106.14	106.47		62.4	446.2				Unique	4.86801	High	0	0.0004039
High	[K].APESSDDSEDSSDSSSGSEEDGEGPQGAK.[S]	2xTMT6plex [N-Term; K29]; 1xPhospho [S]		2.91629e-05	0	3	15	101	530380671; 207113162; 530380673	530380671 [1139-1167]; 207113162 [1101-1129]; 530380673 [1138-1166]	0	3381.37	S12(Phospho): 99.12	132.8	161.4	103.3	304	142.6	277.4	158.4	249.4	297.2	126.9		84.06	87.47	94.49	75.97	17.72	34.11	68.65	87.58	11.52							Not Unique	5.72729	High	0	7.931e-06
High	[K].GSSEQAESDNMDVPPEDDSK.[E]	2xTMT6plex [N-Term; K20]; 1xOxidation [M11(100)]; 1xPhospho [S8(100)]	212549553 1xPhospho [S62(100)]	0.000308698	0	1	7	17	212549553	212549553 [55-74]	0	2691.14	S8(Phospho): 100; M11(Oxidation): 100	2385	474.8	1638.3	1457.1	660.9	1179.9	1934.4	1836.9	1694.5	2153	2.27	11.33	5.14	6.65	9.8	13.44	7.19	12.63	9.12	6.87		2423.3	2346.7				Unique	4.41484	High	0	0.0003299
High	[R].IYSSDSDEGSEEDKAQR.[L]	2xTMT6plex [N-Term; K14]; 1xPhospho [S10(100)]	20270337 1xPhospho [S614(100)]	0.000163012	0	1	5	11	20270337	20270337 [605-621]	1	2454.11	S10(Phospho): 100	1975.5	1533.4	2748.2	2996	798.5	746.6	2058.7	1391.4	1839.9	790.5	0.66	2.43	2.15	0.35	4.34	5.09	2.27	4.88	1.71	8.86		1966.2	1984.7				Unique	5.48981	High	0	0.0001468
High	[R].SVQEGENPDDGVRGSPPEDYR.[L]	1xTMT6plex [N-Term]; 1xPhospho [S15(100)]	238859597 1xPhospho [S28(100)]	0.000126074	0	1	4	7	238859597	238859597 [14-34]	1	2612.15	S15(Phospho): 100	403.1	507.8	612.3	1260.9	289.8	228.3	745.4	463.8	419.6	281.5	9.23	19.84	13.65	3.3	4.66	9.3	8.12	5.21	4.11	5.07		376.8	429.4				Unique	4.74514	High	0	9.919e-05
High	[K].VSEEQTQPPSPAGAGMSTAMGR.[S]	1xTMT6plex [N-Term]; 2xOxidation [M16(100); M20(100)]; 1xPhospho [S10(100)]	530364640 1xPhospho [S157(100)]	0.000152936	0	1	4	77	530364640	530364640 [148-169]	0	2530.12	S10(Phospho): 100; M16(Oxidation): 100; M20(Oxidation): 100	554.7	1240.5	950.9	993.4	637.3	881.9	762.2	1092.7	1196.2	982.4	51.75	61.71	57.84	59.9	66.17	52.34	50.17	46.96	59.84	37.29		457	536.7			495.2	Unique	4.68493	High	0	0.0001462
High	[K].VSEEQTQPPSPAGAGMSTAMGR.[S]	1xTMT6plex [N-Term]; 1xOxidation [M]; 1xPhospho [S10(100)]	530364640 1xPhospho [S157(100)]	0.00012101	0	1	4	116	530364640	530364640 [148-169]	0	2514.12	S10(Phospho): 100; M16(Oxidation): 100	1140.2	1145.5	1464.5	1283	1029.5	1266	912.4	1402.4	1570.9	1208.5	132.95	115.31	129.23	122.13	113.72	118.97	136.9	120.1	127.63	129.76		2813.4	3350.7				Unique	5.17025	High	0	9.279e-05
High	[K].VSEEQTQPPSPAGAGMSTAMGR.[S]	1xTMT6plex [N-Term]; 1xPhospho [S10(100)]	530364640 1xPhospho [S157(100)]	3.48969e-05	0	1	4	17	530364640	530364640 [148-169]	0	2498.13	S10(Phospho): 100	327.2	442.8	624.5	523.5	395	507	495.8	613.9	1060.5	527.9	86.22	75.93	86.24	81.04	75.3	80.46	71.92	68.57	102.52	79.01		405.7	692.4				Unique	6.04376	High	0	1.933e-05
High	[R].GKDSYETSQLDDQSAETHSHK.[Q]	3xTMT6plex [N-Term; K2; K21]; 1xPhospho [S14(100)]	4759166 1xPhospho [S220(100)]; 91206462 1xPhospho [S234(100)]; 91598939 1xPhospho [S207(100)]	2.75684e-05	0	3	5	8	4759166; 91206462; 91598939	4759166 [207-227]; 91206462 [221-241]; 91598939 [194-214]	1	3130.49	S14(Phospho): 100	1386.8	835.6	575.2	784.7	1049.4	663.1	293.1	660.4	501.7	482.8	5.44	7.25	29.69	4.81	1	32.28	24.7	56.8	7.49	2.02							Not Unique	6.42061	High	0	7.148e-06
High	[K].ISTVAVQSVNAGAPLITSTSPTTATSPK.[V]	2xTMT6plex [N-Term; K28]; 1xPhospho [S/T]		0.000354627	0	1	13	26	530377299	530377299 [405-432]	0	3237.74	S20(Phospho): 98.02	384.2	177.7	355.5	158.9	293.8	219.6	129.8	297.5	172.3	340.2	76.12	66.37	56.05	98.43	38.2	37.32	105.31	113.53	71.79	66.73							Unique	4.47046	High	0	0.0003762
High	[R].ENYSDSEEEDDDDVASSR.[Q]	1xTMT6plex [N-Term]; 1xPhospho [S/Y]	7706607 1xPhospho [S259(100)]	0.000385609	0	1	2	7	7706607	7706607 [256-273]	0	2370.89	S6(Phospho): 100	147		381.7	257.1	297.9		717.6			634.1			51.76	8.31	33.5		15.36			1.67							Unique	4.47401	High	0	0.0004029
High	[R].VQDLSAGGQGSLTDSGPER.[R]	1xTMT6plex [N-Term]; 1xPhospho [S11(100)]	1034556295 1xPhospho [S528(100)]	0.00018038	0	1	4	6	1034556295	1034556295 [518-536]	0	2183.02	S11(Phospho): 100	260.4	118.6	164.8	126.7	144.5	128.5	113.4	146.5	194.3	171.1	30.04	87.1	59.28	104.32	67.6	45.18	48.81	57.09	20.15	90.33		205.1	315.7				Unique	4.33033	High	0	0.00017
High	[K].AETSEGSGSAPAVPEASASPK.[Q]	2xTMT6plex [N-Term; K21]; 1xPhospho [S/T]	160707950 1xPhospho [S92(100)]	4.33876e-06	0	1	2	38	160707950	160707950 [74-94]	0	2468.2	S19(Phospho): 100	1741.9	6649.1	5206	1655.3	11359.2	5336	3533	3615.6	5064.2	830.2	89.8	192.91	191.77	46.05	206.09	156.45	171.66	60.58	152.56	51.56							Unique	7.10022	High	0	8.481e-07
High	[K].IPEISIQDMTAQVTSPSGK.[T]	2xTMT6plex [N-Term; K19]; 1xPhospho [S15(100)]	160420317 1xPhospho [S2180(100)]	8.43325e-05	0	1	7	3	160420317	160420317 [2166-2184]	0	2540.31	S15(Phospho): 100	366.3	474.9	256.8	376.6	535.1	611.5	456.8	380.7	562.5	462.4	4.9	18.56	14.64	7.94	30.31	27.5	38.39	2.45	15.34	11.35		379	353.6				Unique	5.18535	High	0	5.1e-05
High	[K].LPSSSGLPAADVSPATAEEPLSPSTPTR.[R]	1xTMT6plex [N-Term]; 2xPhospho [S13(100); T25(98.6)]	1034598889 2xPhospho [S1510(100); T1522(98.6)]	9.11606e-05	0	1	6	6	1034598889	1034598889 [1498-1525]	0	3124.47	S13(Phospho): 100; T25(Phospho): 98.63	406.7	371.9	384.6	234.8	316.6	359.9	238.4	269.1	294.5	448.6	8.21	23.65	32.82	33.18	28.77	27.3	3.29	22.59	58.27	19.85							Unique	5.03105	High	0	0.000114
High	[R].AVTTVTQSTPVPGPSVPPPEELQVSPGPR.[Q]	1xTMT6plex [N-Term]; 1xPhospho [S25(96.8)]	768039909 1xPhospho [S1507(100)]	3.58144e-05	0	1	3	12	768039909	768039909 [1483-1511]	0	3233.67	S25(Phospho): 100	496	389.1	470.5	402.4	237.6	346.4	327.1	380.1	383.9	456.3	20.01	0.47	2.54	9.13	10.86	8.95	9.14	13.88	28.88	14.28		425.8	566.2				Unique	6.21795	High	0	3.354e-05
High	[K].GPGEPDSPTPLHPPTPPILSTDR.[S]	1xTMT6plex [N-Term]; 2xPhospho [S7(99.4); T15(100)]	767970167 2xPhospho [S1873(99.4); T1881(100)]	0.000335409	0	1	7	2	767970167	767970167 [1867-1889]	0	2767.29	S7(Phospho): 99.37; T15(Phospho): 100	1050.5	956.2	1381.6	645.1	1249.4	1558.2	804.5	1477.3	1420.6	1853																	Unique	4.82533	High	0	0.0003582
High	[K].KPATPAEDDEDDDIDLFGSDNEEEDKEAAQLREER.[L]	3xTMT6plex [N-Term; K1; K26]; 1xPhospho [S19(100)]	578815866 1xPhospho [S545(100)]	8.03614e-06	0	1	10	37	578815866	578815866 [527-561]	2	4759.2	S19(Phospho): 100	713.1	684	912	1492.5	624.1	1348.7	984.7	1180.5	2061.3	1804.2	5.35	2.94	2.69	8.95	5.31	5.64	0.63	8.06	12.05	9.3		740.1	686.1				Unique	6.78301	High	0	1.184e-06
High	[R].DVDDGSGSPHSPHQLSSK.[S]	2xTMT6plex [N-Term; K18]; 2xPhospho [S8(99.6); S11(100)]	767971427 2xPhospho [S2442(100); S2445(100)]	0.000247705	0	1	24	8	767971427	767971427 [2435-2452]	0	2468.09	S8(Phospho): 100; S11(Phospho): 100	1051.8	1384.3	2071.4	1897.9	1080.9	1052.4	2137.9	799.5	1193.5	1048.7																1051.8	Unique	5.64788	High	0	0.0002579
High	[K].VPQLEIVPNSAEER.[L]	1xTMT6plex [N-Term]; 1xPhospho [S10(100)]	gi 1xPhospho [S130(100)]	0.000236588	0	1	1	35	gi	gi [121-134]	0	1889.96	S10(Phospho): 100	949.5	956.4	558.1	779.8	776	1212.6	490	713.3	878.9	998	118.09	111.81	104.08	102.52	81.66	73.81	84.62	93.4	102.38	96.15		1852.5	2454.1	40.8			Unique	5.02742	High	0	0.0003011
High	[K].EYIPGQPPLSQSSDSSPTR.[N]	1xTMT6plex [N-Term]; 1xPhospho [S16(98.8)]		0.000442914	0	1	2	86	62241042	62241042 [871-889]	0	2355.11	S16(Phospho): 99.2	1208	861.1	874.3	994	1451.2	1087.9	1003	1343.8	1322.2	1008.2	1.76	71.17	74.17	73.47	4.45	66.14	3.82	0.05	9.76	67.78							Unique	4.78473	High	0	0.0004407
High	[K].TQTPPVSPAPQPTEERLPSSPVYEDAASFK.[A]	2xTMT6plex [N-Term; K30]; 2xPhospho [T3(97.2); S/T/Y]	20357552 2xPhospho [T401(99.5); T411(99.5)]	0.000345248	0	1	4	6	20357552	20357552 [399-428]	1	3844.85	T3(Phospho): 100; T13(Phospho): 33.33; S19(Phospho): 33.33; S20(Phospho): 33.33	249.6	244.7	467.7	302.1	274.8	236.7	479.1	289.7	295.5	574.3	8.81	18.92	4.46	32.79	2.26	18.08	9.73	23.13	11.43	2.9		234.1	265.2				Unique	4.83804	High	0	0.0003678
High	[K].GEGDIHENVDTDLPGSLGQSEEKPVPAAPVPSPVAPAPVPSR.[R]	2xTMT6plex [N-Term; K23]; 1xPhospho [S20(99.3)]	7705877 1xPhospho [S131(100)]	7.95491e-05	0	1	2	16	7705877	7705877 [100-141]	0	4751.4	S32(Phospho): 100	116.2	133	132.9	111.1	106	114.1	138.6	114.8	138.9	97.3	28.51	52.21	58.06	24.75	24.64	55.2	41.51	53.02	48.63	30.62		69.1		135.9	117.3	142.4	Unique	4.70977	High	0	4.617e-05
High	[R].SYSSPDITQAIQEEEK.[R]	2xTMT6plex [N-Term; K16]; 1xPhospho [S/Y/T]	767985733 1xPhospho [S718(99.7)]	0.000125803	0	1	4	47	767985733	767985733 [716-731]	0	2363.14	S3(Phospho): 99.81	2095.5	2014.6	1703.5	2328	1646.9	1610.5	1472.9	2655.2	2246	1580.3	6.62	16.79	10.94	9.6	16.02	8.42	16.97	14.94	10.19	9.19		2193.6	1997.3				Unique	6.5518	High	0	9.89e-05
High	[K].IEEVLSPEGSPSKSPSK.[K]	3xTMT6plex [N-Term; K13; K17]; 2xPhospho [S10(99.8); S]		0.00038958	0	1	3	30	1002341757	1002341757 [668-684]	1	2618.33	S10(Phospho): 100; S14(Phospho): 99.65	1480.3	1881.2	1525.2	1712	1664.4	1553.9	1149.7	1361.1	2387.7	1686.1	26.41	23.95	16.92	23.68	35.86	17.8	15.7	8.09	25.95	17.95		1756.7	1203.9				Unique	4.66484	High	0	0.0004059
High	[R].GREDVSNFDDEFTSEAPILTPPREPR.[I]	1xTMT6plex [N-Term]; 1xPhospho [T20(100)]	5453974 1xPhospho [T958(100)]	6.394e-05	0	1	7	6	5453974	5453974 [939-964]	2	3283.55	T20(Phospho): 100	358	178.6	271.6	288.5	276	136.1	119.2	242.8	255.6	256.8	44.5	21.67	40.73	56.73	60.33	64.29	89.52	68.39	22.36	58.76							Unique	5.51136	High	0	3.149e-05
High	[R].LEGLGSSEADQDGLASTVR.[S]	1xTMT6plex [N-Term]; 1xPhospho [S6(99.7)]	19920317 1xPhospho [S460(99.7)]	0.000339078	0	1	1	8	19920317	19920317 [455-473]	0	2214.05	S6(Phospho): 99.71	194.9	129.4	81.2	118.8	105.9	161.4	102.9	164.6	209.5	192.2	28.42	53.2	12.03	3.26	53.8	19.94	55.07	72.36	48.86	16.16		234.1	155.7				Unique	4.4871	High	0	0.0003615
High	[K].AEAPAGPALGLPSPEAESGVDR.[G]	1xTMT6plex [N-Term]; 1xPhospho [S13(100)]	530410475 1xPhospho [S25(100)]	0.000407019	0	1	2	5	530410475	530410475 [13-34]	0	2400.16	S13(Phospho): 100	325.9	369.4	272.9	373.3	255.4	327.4	255.7	337.4	361.8	431.8	32.73	22.08	29.85	1.96	40.42	22.3	13.18	41.64	39.85	11.19		401.3	250.5				Unique	3.97767	High	9.533e-05	0.0004561
High	[R].SFSTASAITPSVSRTSFTSVSR.[S]	1xTMT6plex [N-Term]; 2xPhospho [S/T]		3.97321e-05	0	1	1	45	119395754	119395754 [16-37]	1	2665.25	S13(Phospho): 99.38; T15(Phospho): 50; S16(Phospho): 50	7919.7	2972.9	3042.5	2660.7	1434	3461.9	3524	3673.1	2963.8	3592.5	3.77	12.87	9.87	18.07	12.06	14.19	5.22	11.31	11.81	18.02							Unique	6.18868	High	0	1.36e-05
High	[R].SSTSGDTEEEEEEEVVPFSSDEQK.[R]	2xTMT6plex [N-Term; K24]; 1xPhospho [S/T]		4.51395e-05	0	3	28	24	1034675225; 1034675223; 1034675227	1034675225 [152-175]; 1034675223 [152-175]; 1034675227 [152-175]	0	3212.39	S2(Phospho): 99.28	122.6	166.4	571.8	204.6	135.8	138.1	365.7	123.6	127.7	129.7												122.6					Not Unique	5.51824	High	0	1.705e-05
High	[K].SASSYSDIEEIATPDSSAPSSPK.[L]	2xTMT6plex [N-Term; K23]; 1xPhospho [S21(100)]	267844811 1xPhospho [S1253(99.7)]	0.000102453	0	1	13	8	267844811	267844811 [1233-1255]	0	2864.35	S21(Phospho): 100	235.2	192.2	286.2	270	163.4	246.4	437.2	338.5	242.7	270.6	62.33	33.03	30.42	6.14	27.96	28.7	48.2	38.81	42.71	26.33		131.5	338.9				Unique	4.5237	High	0	9.52e-05
High	[R].SDRGSGQGDSLYPVGYLDK.[Q]	2xTMT6plex [N-Term; K19]; 1xPhospho [S5(100)]		0.000275913	0	1	2	13	7705997	7705997 [32-50]	1	2552.24	S5(Phospho): 100	1291.9	1284	856.3	1028.7	563.7	1071.8	857.7	649.7	1065.5	697.5	19.4	12.23	21.27	16.77	22.93	3.94	11.64	24.82	19.6	21.25		1114.7	1469.1				Unique	5.32054	High	0	0.0003536
High	[K].ATVSENVAASAAATTPATSPPAVNTSPSVPTTTTATEEQVSEPK.[K]	2xTMT6plex [N-Term; K44]; 1xPhospho [T/S]	1034657484 1xPhospho [S147(100)]	0.000126074	0	1	7	59	1034657484	1034657484 [138-181]	0	4807.38	S10(Phospho): 100		81.2	64.3	127.6	48.6	151.7	69.1	63.6	82.8	78.2		59.55	5.94	39.83	22.12	74.86	89.32	18.68									Unique	4.26097	High	0	9.908e-05
High	[K].NINMDNDLEVLTSSPTR.[N]	1xTMT6plex [N-Term]; 1xOxidation [M4(100)]; 1xPhospho [S/T]		0.000220884	0	1	3	10	75992941	75992941 [539-555]	0	2244.04	M4(Oxidation): 100; S14(Phospho): 99.3	223.1	177.3	199.1	187.6	120.5	221.6	164.5	178	176.8	221.5	21.32	30.73	32.63	22.82	55.64	31.75	10.03	17.02	21.49	7.8		189.5	256.8				Unique	4.33587	High	0	0.0002235
High	[R].ESASPTIPNLDLLEAHTK.[E]	2xTMT6plex [N-Term; K18]; 1xPhospho [S/T]	530391243 1xPhospho [S539(99.2)]	0.000320392	0	1	3	9	530391243	530391243 [536-553]	0	2474.29	S4(Phospho): 100	366.4	410	411.1	383.7	235.7	333.6	343.5	560.7	445.5	328.9	22.68	40.19	38.67	16.98	48.8	55.54	15.11	64.09	28.13	17.57		307.6	425.1				Unique	4.60844	High	0	0.0003739
High	[R].TGDLGIPPNPEDRSPSPEPIYNSEGK.[R]	2xTMT6plex [N-Term; K26]; 2xPhospho [S14(100); S16(100)]	295842330 2xPhospho [S205(99.3); S207(99.3)]	0.000351484	0	1	15	254	295842330	295842330 [192-217]	1	3384.58	S14(Phospho): 100; S16(Phospho): 100	2824.8	3644.7	2338.5	4421.8	2909.1	4327.1	2249	3859.2	4602.1	5470.9	68.99	87.48	75.13	77.46	81.87	78.25	74.75	78.19	75.74	103.1		3711.8	5623.7	4110	4302.9	1892.7	Unique	5.20865	High	0	0.0003991
High	[R].DALGDSLQVPVSPSSTTSSR.[C]	1xTMT6plex [N-Term]; 1xPhospho [S12(99.6)]	6005709 1xPhospho [S383(99.6)]	8.90176e-05	0	1	5	5	6005709	6005709 [372-391]	0	2313.12	S12(Phospho): 100	210.8	141.2	174.5	269.4	142.1	272.5	188.5	236.5	209.3	252.6	27.46	40.47	70.8	30.24	66.8	53.37	38	42.53	43.58	36.08							Unique	4.82935	High	0	0.0001369
High	[R].KPSPAQAAETPALELPLPSVPAPAPL.[-]	2xTMT6plex [N-Term; K1]; 1xPhospho [S3(100)]	862669351 1xPhospho [S605(100)]	7.53131e-06	0	1	1	2	862669351	862669351 [603-628]	0	3100.71	S3(Phospho): 100	533.9	97.5	189.3	261.5	163.6	245.3	115.8	244.9	360	403.2	2.06	21.47	10.16	23.14	0.05	46.17	33.22	13.9	51.14	4.42		541.7	526.2				Unique	7.54226	High	0	7.223e-07
High	[K].TVLGPDTAEPATAEAAVAPPDAGLPLPGLPAEGSPPPK.[T]	2xTMT6plex [N-Term; K38]; 1xPhospho [S34(100)]	1034601569 1xPhospho [S429(100)]	1.42543e-05	0	1	1	2	1034601569	1034601569 [396-433]	0	4110.15	S34(Phospho): 100	798.1	260.7	352.3	243	200.8	391.3	255.5	356	386	357.4												798.1					Unique	6.76441	High	0	2.226e-06
High	[R].TLFYSSPLLGPSSTSEAVGSSSPR.[N]	1xTMT6plex [N-Term]; 1xPhospho [S22(99.6)]	767963812 1xPhospho [S176(99.2)]	1.99309e-05	0	1	10	6	767963812	767963812 [155-178]	0	2736.33	S22(Phospho): 99.59	201.4	121	292.1	136.9	809.3	349.4	174	167.4	528.3	378.2	1.03	2.27	1.77	5.34	28.3	8.89	4.96	2.21	6.11	1.01		202.9	199.9				Unique	6.45003	High	0	4.034e-06
High	[R].EAEALLQSMGLTPESPIVPPPMSPSSK.[S]	2xTMT6plex [N-Term; K27]; 2xOxidation [M9(100); M22(100)]; 2xPhospho [S15(100); S23(96.9)]	1003701575 2xPhospho [S73(100); S81(96.9)]	5.0841e-05	0	1	4	1	1003701575	1003701575 [59-85]	0	3443.65	M9(Oxidation): 100; S15(Phospho): 99.97; M22(Oxidation): 100; S23(Phospho): 96.92	145.9	186.5	211.5	152.7	162	272.5	254.5	278.7	140.9	654.2																	Unique	6.02259	High	0	2.099e-05
High	[R].EAEALLQSMGLTPESPIVPPPMSPSSK.[S]	2xTMT6plex [N-Term; K27]; 2xOxidation [M9(100); M22(100)]; 1xPhospho [S/T]		2.00172e-05	0	1	4	4	1003701575	1003701575 [59-85]	0	3363.69	M9(Oxidation): 100; M22(Oxidation): 100; S23(Phospho): 49.83; S26(Phospho): 49.83	309.3	107.5	339	263.3	104.5	504.9	342.1	414.1	399.4	599	28.82	2.12	10.31	19.98	1.61	24.5	25.57	25.78	3.76	19.86		372.3	246.2				Unique	6.17584	High	0	4.057e-06
High	[R].EAEALLQSMGLTPESPIVPPPMSPSSK.[S]	2xTMT6plex [N-Term; K27]; 1xPhospho [S/T]; 1xOxidation [M22(100)]	1003701575 1xPhospho [S81(99.4)]	5.29736e-05	0	1	4	1	1003701575	1003701575 [59-85]	0	3347.69	M9(Oxidation): 100; S23(Phospho): 99.39	157.3	117.5	282.1	111.1	115	262.9	172.6	134	438.1	298.9														157.3			Unique	5.39492	High	0	2.259e-05
High	[R].EAEALLQSMGLTPESPIVPPPMSPSSK.[S]	2xTMT6plex [N-Term; K27]; 1xPhospho [S23(99.4)]	1003701575 1xPhospho [S81(99.4)]	2.30385e-05	0	1	4	2	1003701575	1003701575 [59-85]	0	3331.7	S23(Phospho): 99.45	118.2	64.6	171	121.5	75.4	317.7	138.7	65.9	177.7	217.2												118.2					Unique	5.03915	High	0	5.195e-06
High	[R].EGESPAAGPPPQELVEEEPSAPPTLLEEETEDGSDK.[V]	2xTMT6plex [N-Term; K36]; 1xPhospho [S4(100)]	503774453 1xPhospho [S1093(100)]	3.21923e-06	0	1	2	5	503774453	503774453 [1090-1125]	0	4299	S4(Phospho): 100	1631.2	1438.3	785.9	807.7	689.5	564.3	1032	1882.9	1269.2	925.3	18.61	29.44	5.8	19.34	22.33	3.18	7.29	26.58	14.54	4.72		1845.9	1416.5				Unique	9.0348	High	0	1.612e-07
High	[R].LPNLSSPSAEGPPGPPSGPAPR.[K]	1xTMT6plex [N-Term]; 1xPhospho [S]		6.85217e-05	0	1	8	8	209180457	209180457 [458-479]	0	2391.19	S5(Phospho): 50; S6(Phospho): 50	212.7	76.3	265.3	100.6	141.7	135.2	140.3	140.3	142	334.7	23.49	27.26	34.96	10.07	20.68	55.4	27.85	6.99	11.07	2.37							Unique	5.41806	High	0	3.554e-05
High	[K].SEEVPAFGVASPPPLTDTPDTTANAEGDLPTTMGGPLPPHLALK.[A]	2xTMT6plex [N-Term; K44]; 1xOxidation [M33(100)]; 1xPhospho [S11(100)]	100913206 1xPhospho [S87(100)]	2.84587e-06	0	1	1	3	100913206	100913206 [77-120]	0	4963.47	S11(Phospho): 100; M33(Oxidation): 100	195.4	78.5	239.4	127.8	83.1	118.6	218.2	102	192.7	212.8	41.41	14.76	18.8	19.63	27.9	33.17	24.23	7.41	31.49	9.97		176.1	284.1		125.8		Unique	6.90748	High	0	1.3e-07
High	[K].TSESGELHGLTTEEEFVEGIYK.[V]	2xTMT6plex [N-Term; K22]; 1xPhospho [S/T/Y]	4507725 1xPhospho [S72(100)]	8.82508e-05	0	1	1	13	4507725	4507725 [69-90]	0	2993.44	S4(Phospho): 99.7	320.2	164.2	270.5	144.1	139.6	294.2	166	210.6	460.4	540.6	20.32	6.32	10.63	24.71	5.06	33.71	28.87	15.78	14.26	14.79		274.2	366.2				Unique	6.06121	High	0	5.515e-05
High	[R].SSSAPNVHINTIEPVNIDDLIR.[D]	1xTMT6plex [N-Term]; 1xPhospho [S3(98.9)]		0.000202255	0	1	4	12	1034656683	1034656683 [363-384]	0	2713.38	S2(Phospho): 49.89; S3(Phospho): 49.89	332.4	208.4	342.6	289.5	240	551.7	238.3	315.8	666.5	622.9	0.08	9.85	11.3	0.25	6.71	25.36	17.31	20.96	29.76	6.15		332.2	332.5				Unique	5.21984	High	0	0.000199
High	[R].ATSNVFAMFDQSQIQEFK.[E]	2xTMT6plex [N-Term; K18]; 1xPhospho [S3(99.6)]	740087210 1xPhospho [S25(99.6)]	0.000383632	0	1	5	2	740087210	740087210 [23-40]	0	2629.28	S3(Phospho): 99.6	37.7	139	84.1	103.2	284.2	149.3	324.6	173.6	108	136																	Unique	5.47083	High	0	0.0004013
High	[R].DVAGATWGNGSGEEEEEEDGPAVLVEQQTDSAMEPTGPTQER.[Y]	1xTMT6plex [N-Term]; 1xOxidation [M33(100)]; 1xPhospho [S/T]	530381804 1xPhospho [S324(100)]	0.000251168	0	1	1	11	530381804	530381804 [314-355]	0	4728.03	S11(Phospho): 99.99; M33(Oxidation): 100	455.4	272.4	306.8	331.3	253.3	293.8	240.3	319.6	301.9	299.3																455.4	Unique	3.47285	High	0	0.0002619
High	[R].DVAGATWGNGSGEEEEEEDGPAVLVEQQTDSAMEPTGPTQER.[Y]	1xTMT6plex [N-Term]; 1xPhospho [S11(100)]	530381804 1xPhospho [S324(100)]	3.31319e-05	0	1	1	7	530381804	530381804 [314-355]	0	4712.03	S11(Phospho): 100	122	26	100.9	64.2	43.7	61.1	91.2	64	64.6	106																122	Unique	4.86564	High	0	9.878e-06
High	[R].RGSSGSVDETLFALPAASEPVIR.[S]	1xTMT6plex [N-Term]; 1xPhospho [S3(99.6)]	24431935 1xPhospho [S181(99.6)]	8.61762e-05	0	1	2	21	24431935	24431935 [179-201]	1	2668.35	S3(Phospho): 99.58	149.3	95.6	122.9	149	106.4	160.4	144.3	174.6	178.6	160.6	84.32	62.13	71.69	62.75	60.29	57.74	57.32	62.08	69.2	61.2		280.9	136.8				Unique	5.54287	High	0	5.295e-05
High	[K].QMNMSPPPGNAGPVIMSIEEK.[M]	2xTMT6plex [N-Term; K21]; 1xPhospho [S5(100)]	4758876 1xPhospho [S150(100)]	0.000398253	0	1	2	1	4758876	4758876 [146-166]	0	2765.35	S5(Phospho): 100	284.2	90.8	264.8	126.1	117.5	161	238.3	139.6	119.3	179.3																284.2	Unique	5.43075	High	0	0.0004124
High	[R].FFTTGSDSESESSLSGEELVTKPVGGNYGK.[Q]	3xTMT6plex [N-Term; K22; K30]; 1xPhospho [S/T/Y]	961441527 1xPhospho [S18(99.6)]	5.98842e-06	0	1	5	33	961441527	961441527 [4-33]	0	3876.9	S15(Phospho): 100	135.3	69.6	157.4	452.7	66.3	124.2	139.9	156	195.2	113.9	76.88	66.38	72.95	65.44	66.07	45.98	36.5	70.28	51.49	52.08		245.2	122.1				Unique	6.27151	High	0	4.828e-07
High	[K].TIGGGDDSFNTFFSETGAGK.[H]	2xTMT6plex [N-Term; K20]; 1xPhospho [S8(100)]	733605926 1xPhospho [S118(100)]; 57013276 1xPhospho [S48(100)]	0.000272196	0	2	8	4	733605926; 57013276	733605926 [111-130]; 57013276 [41-60]	0	2546.19	S8(Phospho): 100	4033.2	383.7	708.8	332.1	553.5	192.7	534.2	227.9	304.8	308.3																4033.2	Not Unique	5.59813	High	0	0.0002883
High	[K].SEEVPAFGVASPPPLTDTPDTTANAEGDLPTTMGGPLPPHLALK.[A]	2xTMT6plex [N-Term; K44]; 1xPhospho [S11(100)]	100913206 1xPhospho [S87(100)]	1.88411e-05	0	1	1	1	100913206	100913206 [77-120]	0	4947.48	S11(Phospho): 100	170.8	96	258.9	181.2	103.7	173.9	248	113.2	228.2	167.4														170.8			Unique	6.38025	High	0	3.646e-06
High	[R].YSQGDDDGSSSSGGSSVAGSQSTLFK.[D]	2xTMT6plex [N-Term; K26]; 1xPhospho [S/Y/T]		0.000269039	0	1	5	42	313760643	313760643 [11-36]	0	3049.37	S2(Phospho): 100	501	718	1353.3	498	541.7	391.2	446.5	447.2	470.8	388.1	82.15	98.32	104.38	100.44	103.68	97.9	94.98	85.24	94.89	85.52		138.2	166.3				Unique	5.20726	High	0	0.0002844
High	[K].AGEQQLSEPEDMEMEAGDTDDPPR.[I]	1xTMT6plex [N-Term]; 2xOxidation [M12(100); M14(100)]; 1xPhospho [S7(100)]	1034595923 1xPhospho [S18(100)]	0.00034649	0	1	2	11	1034595923	1034595923 [12-35]	0	2988.2	S7(Phospho): 100; M12(Oxidation): 100; M14(Oxidation): 100	733.8	533.5	398	671	234.3	633.6	405.6	571.3	472	468.2	14.69	5.33	43.69	17.95	30.11	33.19	19.03	25.3	50.52	55.56							Unique	4.3601	High	0	0.0003801
High	[R].VNQSALEAVTPSPSFQQR.[H]	1xTMT6plex [N-Term]; 1xPhospho [S12(100)]	6912242 1xPhospho [S401(99.6)]	0.000207317	0	1	2	2	6912242	6912242 [390-407]	0	2268.12	S12(Phospho): 100	84.6	99.2	86.3	71	91.9	96.4	102.5	116.8	103.4	100	55.68	58.38	47.26	14.03	48.56	11.63	43.47	19.63	38.9	0.66		51.3	117.9				Unique	4.42911	High	0	0.0002053
High	[R].DFQEYVEPGEDFPASPQR.[R]	1xTMT6plex [N-Term]; 1xPhospho [S15(100)]	166795297 1xPhospho [S207(100)]	0.000155897	0	1	1	13	166795297	166795297 [193-210]	0	2420.06	S15(Phospho): 100	1604	752.6	1255.9	1125.3	892.4	1500.8	1271.9	1109.3	1032.6	1369.9	13.3	9.73	21.55	14.62	26.26	7.3	14.06	26.49	30.36	15.95							Unique	5.71358	High	0	0.0001373
High	[K].NQSPTEAEKPASSSLPSSPPPQLLTR.[N]	2xTMT6plex [N-Term; K9]; 1xPhospho [S3(99.5)]	1002341820 1xPhospho [S35(99.5)]	0.000108145	0	1	2	40	1002341820	1002341820 [33-58]	0	3257.68	S3(Phospho): 99.47	381.4	353.9	271.6	302.2	308.1	315.6	262.1	371.6	312.1	344.3	78.03	83.85	86.23	84	77.82	77.08	75.12	85.03	70.41	76.39		653.2	738.7	99	127.9		Unique	5.54231	High	0	7.753e-05
High	[R].HAPSPEPAVQGTGVAGVPEESGDAAAIPAK.[K]	2xTMT6plex [N-Term; K30]; 1xPhospho [S4(100)]	19718751 1xPhospho [S23(100)]	4.1912e-06	0	1	1	11	19718751	19718751 [20-49]	0	3348.69	S4(Phospho): 100	640.1	1543.7	652.3	733.3	1278.5	1039.2	523.5	989.6	944.8	789.9	2.39	23.32	27.93	17.9	12.73	9.56	13.4	26.76	22.78	12.76		651	629.3				Unique	7.51205	High	0	2.569e-07
High	[K].NSGEPLPPKPGPGSPSHPGALDLDGVSR.[Q]	2xTMT6plex [N-Term; K9]; 1xPhospho [S14(99.6)]	1034644575 1xPhospho [S319(100)]	7.9894e-05	0	1	3	13	1034644575	1034644575 [306-333]	0	3273.67	S14(Phospho): 100	576.3	432.8	1503.1	613.7	473.2	760.8	490.3	520.7	1166.9	748.1	15.06	51.06	37.43	35.34	37.73	37.87	47.27	42.49	29.18	30.81		515	637.7				Unique	5.2079	High	0	0.0001253
High	[K].DGDSYDPYDFSDTEEEMPQVHTPK.[T]	2xTMT6plex [N-Term; K24]; 1xOxidation [M17(100)]; 1xPhospho [Y/S/T]	394582093 1xPhospho [T767(100)]	0.000264872	0	1	2	14	394582093	394582093 [746-769]	0	3356.42	M17(Oxidation): 100; T22(Phospho): 99.11	1106.7	1125.4	1258.3	1470.7	729.7	943.5	1413.3	1214.1	1367.6	1034.9																1106.7	Unique	4.60802	High	0	0.0002794
High	[R].TEPAAEAEAASGPSESPSPPAAEELPGSHAEPPVPAQGEAPGEQAR.[D]	1xTMT6plex [N-Term]; 1xPhospho [S/T]	767945997 1xPhospho [S83(99)]	5.94191e-08	0	1	2	177	767945997	767945997 [68-113]	0	4767.19	S16(Phospho): 50; S18(Phospho): 50	319.3	775.2	378.4	962.3	730.7	491.1	529.4	737.9	577.1	443.4	74.51	7.08	80.59	10.06	3.66	78.23	82.75	18.74	77.76	81.71		448.1	465.1		44.8		Unique	10.8557	High	0	2.821e-09
High	[K].LLKEGEEPTVYSDEEEPKDESAR.[K]	3xTMT6plex [N-Term; K3; K18]; 1xPhospho [S/T/Y]	5729875 1xPhospho [S181(100)]	7.60172e-05	0	1	2	30	5729875	5729875 [170-192]	2	3417.69	S12(Phospho): 100	675.7	1363.6	1222.1	1759.5	738	2189.1	3127.3	1105.6	2937.6	1795.7	0.89	18.7	14.83	23.24	12.68	21.66	31.28	12.48	23.42	18.68		679.9	671.4				Unique	5.62853	High	0	4.261e-05
High	[K].ELVSSSSSGSDSDSEVDKK.[L]	3xTMT6plex [N-Term; K18; K19]; 1xPhospho [S12(96.9)]		2.64585e-05	0	1	1	98	1034643401	1034643401 [6-24]	1	2710.33	S12(Phospho): 100	1755.9	10086.7	5929.1	5263.8	11923.6	4570.2	5001.3	4718.8	8293.3	1155	145.51	179.88	166.1	166.42	176.29	167.87	174	170.69	169.89	135.2				180.6	177	134.3	Unique	6.79876	High	0	6.635e-06
High	[R].AFVEDSEDEDGAGEGGSSLLQK.[R]	2xTMT6plex [N-Term; K22]; 1xPhospho [S6(100)]	145580615 1xPhospho [S177(100)]	0.000383632	0	1	2	6	145580615	145580615 [172-193]	0	2778.28	S6(Phospho): 100	664.1	426.3	503	471.5	596.6	458.6	321.6	749.3	486.1	616.7	45.86	19.31	35.42	35.79	46.64	62.94	45.74	32.26	52.98	84.47							Unique	4.33479	High	0	0.0004012
High	[K].SAQETPESSLAGSPDTESPVLVNDYEAESGNISQK.[S]	2xTMT6plex [N-Term; K35]; 1xPhospho [S/T/Y]		0.000364795	0	1	31	4	134142826	134142826 [1923-1957]	0	4174.96	S13(Phospho): 25; T16(Phospho): 25; S18(Phospho): 25; Y25(Phospho): 25																											No Quan Values	3.81472	High	0	0.0003857
High	[R].LGGDEDGYEEEEDENSRQSEDDDSETEKPEADDPK.[DE]	3xTMT6plex [N-Term; K28; K35]; 1xPhospho [T26(85.4)]	767994480 1xPhospho [S77(97.8)]	0.000273784	0	1	3	3	767994480	767994480 [54-88]	1	4726.01	S24(Phospho): 97.75	129.6	87.7	102.3	147.1	81.1	135.9	102.7	179.1	127.4	140																129.6	Unique	3.8761	High	0	0.0002898
High	[R].IEVLPVDTGAGGYSGNSGSPK.[N]	2xTMT6plex [N-Term; K21]; 1xPhospho [S19(100)]	578818661 1xPhospho [S744(100)]	0.000125803	0	1	6	3	578818661	578818661 [726-746]	0	2543.28	S19(Phospho): 100	502.3	329	358.9	341.4	229	297.6	237.6	253.3	321	324.1	54.12	57.77	75.41	61.78	54.04	42.48	56.61	35.76	51.82	56.86							Unique	4.59284	High	0	9.891e-05
High	[K].GTEPSPGGTPQPSRPVSPAGPPEGVPEEAQPPR.[L]	1xTMT6plex [N-Term]; 2xPhospho [S5(95.7); S17(97.1)]	767988881 2xPhospho [S114(98.6); S126(98.6)]	1.35333e-05	0	1	4	59	767988881	767988881 [110-142]	0	3648.69	S5(Phospho): 100; S17(Phospho): 100	1271.6	835.7	1540.9	848.4	909.7	1104.8	696.5	976.1	2146.6	1131.8	78.54	73.21	74.52	76.43	75.61	77.41	81.82	80.03	78.2	77.51		120.4		1788	1906.2		Unique	7.82415	High	0	2.033e-06
High	[K].GTEPSPGGTPQPSRPVSPAGPPEGVPEEAQPPR.[L]	1xTMT6plex [N-Term]; 1xPhospho [S5(99.9)]	767988881 1xPhospho [S126(99.1)]	6.44956e-05	0	1	4	9	767988881	767988881 [110-142]	0	3568.73	S17(Phospho): 99.16	322.4	570.8	310.4	253.9	479.4	289.5	169	286.6	450.8	283.4	98.37	126.49	95.88	61.52	77.49	74.87	69.71	78.17	75.66	71.91						546.7	Unique	7.05687	High	0	0.000106
High	[K].AVTGQTTQVSPPVIAGR.[V]	1xTMT6plex [N-Term]; 1xPhospho [S10(100)]	578808764 1xPhospho [S264(100)]	0.000262293	0	1	2	3	578808764	578808764 [255-271]	0	1991.05	S10(Phospho): 100	199.6	165.8	209.6	163.8	246.3	145.9	209.7	144.2	184	174.1	37.05	33.01	16.17	6.51	27.12	1.35	44.84	17.05	41.06	3.14		251.9	147.3				Unique	4.84379	High	0	0.0002819
High	[R].SSLGQSASETEEDTVSVSK.[K]	2xTMT6plex [N-Term; K19]; 1xPhospho [S/T]	55749531 1xPhospho [S307(99.7)]	0.000382316	0	1	4	27	55749531	55749531 [302-320]	0	2479.19	S6(Phospho): 100	504.7	339.4	691.2	492.8	382.1	391.6	338.8	575.1	783.3	616.5	57.36	53.11	54.41	41.67	63.25	48.38	47.52	37.16	36.67	44.17		298.7	681.9	772.7	835.8		Unique	4.85325	High	0	0.0004002
High	[K].SLDSEPSVPSAAKPPSPEK.[T]	3xTMT6plex [N-Term; K13; K19]; 1xPhospho [S16(100)]	1034556830 1xPhospho [S432(100)]	0.000275913	0	1	8	18	1034556830	1034556830 [417-435]	0	2690.43	S16(Phospho): 100	676.2	853.6	704	898.2	979	818.3	729.5	1613.3	1033.6	808.7	97.21	91.86	96.05	94.22	90.54	88.66	85.08	95.85	90.27	92.13		1277.4	1212.3				Unique	5.11745	High	9.533e-05	0.0004541
High	[R].ISIGGGSCAISGGYGSR.[A]	1xTMT6plex [N-Term]; 1xCarbamidomethyl [C8]; 1xPhospho [S16(100)]	119703753 1xPhospho [S85(100)]; 5031839 1xPhospho [S85(100)]; 155969697 1xPhospho [S85(100)]	0.000239929	0	3	3	8	119703753; 5031839; 155969697	119703753 [70-86]; 5031839 [70-86]; 155969697 [70-86]	0	1907.89	S16(Phospho): 100	315.3	167.6	255.9	339.6	169.9	258.7	767.8	210.3	227.6	256.3	20.58	5.22	6	9.29	19.7	1.31	21.67	27.06	17.3	5.89		361.1	269.4				Not Unique	4.65484	High	0	0.0002696
High	[R].MEVGPFSTGQESPTAENAR.[L]	1xTMT6plex [N-Term]; 1xOxidation [M1(100)]; 1xPhospho [S12(97.2)]	13654270 1xPhospho [S617(100)]	0.000226328	0	1	8	6	13654270	13654270 [606-624]	0	2333.03	M1(Oxidation): 100; S12(Phospho): 100	256.8	245.6	127.5	199.9	239	196.6	159.7	161.9	239.9	303.8	25.53	6.66	2.7	14.15	16.51	16.67	5.5	23.35	7.16	51.61		303.2	210.5				Unique	4.73147	High	0	0.0002304
High	[R].ATAQPPAPLSPDSGSPSPDSGSASPVEEEDVGSSEK.[L]	2xTMT6plex [N-Term; K36]; 1xPhospho [S/T]	48255913 1xPhospho [S24(100)]	0.000323956	0	1	1	57	48255913	48255913 [15-50]	0	4004.85	S10(Phospho): 99.99	217.4	664.5	266.9	263.3	313.9	337.9	211.7	229.3	346.2	198.1		50.23	63.48	37.98	87.38	9.05	49.83	19.62		53.3							Unique	4.07273	High	0	0.000346
High	[K].TDDDVIGQAPAEASPPPIAPKPVTIPASQVSTQNLK.[T]	3xTMT6plex [N-Term; K21; K36]; 1xPhospho [S14(99.1)]	510937001 1xPhospho [S1052(100)]	0.000116899	0	1	4	5	510937001	510937001 [1039-1074]	0	4420.36	S14(Phospho): 100	205.4	73.9	234.4	147.3	80.6	97.7	77	142	108.5	109.2	21.86	26.24	22.65	37.97	6.17		22.13		63.24	15.48							Unique	4.44639	High	0	8.79e-05
High	[R].RSSTSGDTEEEEEEEVVPFSSDEQK.[R]	2xTMT6plex [N-Term; K25]; 1xPhospho [S2(99.8)]	1034675225 1xPhospho [S152(99.8)]; 1034675223 1xPhospho [S152(99.8)]; 1034675227 1xPhospho [S152(99.8)]	1.42142e-06	0	3	28	116	1034675225; 1034675223; 1034675227	1034675225 [151-175]; 1034675223 [151-175]; 1034675227 [151-175]	1	3368.49	S2(Phospho): 49.86; S3(Phospho): 49.86	1156.3	508.8	4556.9	1598.8	703.3	350	6314.3	244.2	766.2	738.6	24.07	44.53	8.22	20	32.91	65.58	8.15	96.71	39.16	50.68				1353.2	959.5		Not Unique	9.11777	High	0	3.813e-08
High	[K].EYVSNDAAQSDDEEK.[L]	2xTMT6plex [N-Term; K15]; 1xPhospho [S10(100)]	45238858 1xPhospho [S403(100)]	0.000370586	0	1	5	2	45238858	45238858 [394-408]	0	2237.99	S10(Phospho): 100	935	236.9	812.5	690.4	408.5	589.5	877.6	669.9	759	497.2																935	Unique	4.72072	High	0	0.0003905
High	[K].EAPAEGEAAEPGSPTAAEGEAASAASSTSSPK.[A]	2xTMT6plex [N-Term; K32]; 1xPhospho [S23(96.2)]		8.44598e-06	0	1	1	89	153070260	153070260 [106-137]	0	3453.59	S13(Phospho): 99.39	838.9	657.8	1315.3	631.9	746.2	1156.9	1273.3	741.3	1082.7	738	114.51	79.18	107.57	93.42	69.46	83.58	104.6	107.17	65.33	96.85				421.3	157.8	1937.6	Unique	6.99959	High	0	8.854e-07
High	[K].GNAEGSSDEEGKLVIDEPAK.[E]	3xTMT6plex [N-Term; K12; K20]; 2xPhospho [S6(100); S7(100)]	186928819 2xPhospho [S148(100); S149(100)]	4.5828e-05	0	1	5	144	186928819	186928819 [143-162]	1	2892.39	S6(Phospho): 100; S7(Phospho): 100	6345.6	5836.9	5724.4	5841	5504.5	6657.3	4398.6	8036.2	6769.1	8850.5	111.4	112.29	112.64	111.97	110.34	110.12	111.76	110.85	111.18	112.78		13266.6	11611.5	205.8			Unique	6.902	High	0	1.749e-05
High	[K].GNAEGSSDEEGKLVIDEPAK.[E]	3xTMT6plex [N-Term; K12; K20]; 1xPhospho [S6(99.8)]	186928819 1xPhospho [S148(99.8)]	5.01856e-05	0	1	5	138	186928819	186928819 [143-162]	1	2812.42	S6(Phospho): 99.7	13752.5	19851.5	11726.4	8614.2	16701.6	9878.4	7240.4	16798.3	10716.8	10523.1	13.27	10.38	7.92	11.05	8.56	12.32	11.92	10.52	7.2	10.54				12461.9	15043		Unique	6.94949	High	0	9.349e-05
High	[R].LAEAPSPAPTPSPTPVEDLGPQTSTSPGR.[L]	1xTMT6plex [N-Term]; 1xPhospho [T/S]	355390315 1xPhospho [S1561(100)]	6.74922e-05	0	1	2	16	355390315	355390315 [1536-1564]	0	3166.55	S26(Phospho): 99.63	758.8	209.3	221.3	162.5	328.1	293.2	171.3	412.7	445	375.5		77.71	111.55	100.99		95.39	82.32										Unique	5.6571	High	0	3.467e-05
High	[K].GLNVIGASDQSPLQSPSNLR.[D]	1xTMT6plex [N-Term]; 1xPhospho [S11(99.6)]	374349211 1xPhospho [S1099(99.6)]	0.000282371	0	1	15	2	374349211	374349211 [1089-1108]	0	2362.2	S11(Phospho): 100	138.6	76.3	100.2	76.4	59.8	80.7	53.4	96	86.9	98.2		30.27	3.45	38.22	38.01	20.69				7.7							Unique	4.00404	High	0	0.0003002
High	[K].SVAAEGALLPQTPPSPR.[N]	1xTMT6plex [N-Term]; 1xPhospho [S15(100)]	578801173 1xPhospho [S329(100)]	0.000170418	0	1	5	10	578801173	578801173 [315-331]	0	2000.04	S15(Phospho): 100	371.6	287.5	372.5	564.9	276.7	345	369.5	453.5	385.7	377	25.19	16.35	31.93	24.25	24	20.01	19.84	27.82	6.51	33.38		305.4	437.8				Unique	5.05514	High	0	0.0001853
High	[R].SSSVGSSSSYPISPAVSR.[T]	1xTMT6plex [N-Term]; 1xPhospho [S/Y]		0.000222687	0	1	22	65	578816045	578816045 [4279-4296]	0	2063.98	S3(Phospho): 99.26	523	5283.9	1706.2	2446.4	4294.7	2486.6	3815.4	3129.1	2291.1	1774.9	58.19	112.04	88.41	108.75	98.27	104.22	115.41	107.35	104.49	109.85					145		Unique	5.71949	High	0	0.0002876
High	[K].IKNENTEGSPQEDGVELEGLK.[Q]	3xTMT6plex [N-Term; K2; K21]; 1xPhospho [S9(100)]	19913406 1xPhospho [S1247(100)]	5.68924e-05	0	1	3	9	19913406	19913406 [1239-1259]	1	3053.56	S9(Phospho): 100	259.7	191.9	311.6	249.5	241.4	249.5	238.6	283.7	400.7	295.5	82.87	83.6	81.23	84.99	64.88	86.79	62.57	90.36	68.69	75.44		483.8	404.1				Unique	5.0484	High	0	2.564e-05
High	[K].EPPRASPPGGLAEPPGSAGPQAGPTVVPGSATPMETGIAETPEGR.[R]	1xTMT6plex [N-Term]; 1xOxidation [M34(100)]; 1xPhospho [S6(100)]	578798679 1xPhospho [S69(100)]	0.00015196	0	1	8	15	578798679	578798679 [64-108]	1	4600.22	S6(Phospho): 100; M34(Oxidation): 100	179.6	157.7	109.8	154.8	144.3	147.2	114.9	136.4	197.2	160.2	55.81	66.96	58.12	50.32	57.82	53.68	43.38	59.05	39.27	46.86			250.5	108.7			Unique	5.49507	High	0	0.0001323
High	[K].EPPRASPPGGLAEPPGSAGPQAGPTVVPGSATPMETGIAETPEGR.[R]	1xTMT6plex [N-Term]; 1xPhospho [S6(100)]	578798679 1xPhospho [S69(100)]	2.35932e-05	0	1	8	10	578798679	578798679 [64-108]	1	4584.23	S6(Phospho): 100	147.6	116	167.9	157.3	162.1	151.7	128.2	129.9	212	185.2	5.65	4.67	7.53	13.65	13.17	3.08	11.96	11.54	16.72	35.66				141.7	153.5		Unique	6.30567	High	0	1.036e-05
High	[R].TSVQTEDDQLIAGQSAR.[A]	1xTMT6plex [N-Term]; 1xPhospho [S2(99.5)]	1022434686 1xPhospho [S655(99.7)]	9.35574e-05	0	1	23	4	1022434686	1022434686 [654-670]	0	2128.01	S2(Phospho): 99.69	209.5	239.3	295.8	182.6	215.6	372.6	217.7	191.2	203.1	598.1																209.5	Unique	5.67449	High	0	6.096e-05
High	[R].ESESESDETPPAAPQLIK.[K]	2xTMT6plex [N-Term; K18]; 1xPhospho [S6(100)]	4503337 1xPhospho [T458(100)]	0.000127991	0	1	2	49	4503337	4503337 [450-467]	0	2466.21	S6(Phospho): 100	625	2071.5	591	1093.2	1197.4	844.4	784.8	1242.9	926.6	699.5	64.61	57.88	55.78	51.63	21.48	49.12	44.32	46.28	25.23	44.65		815.9	1102.9				Unique	5.30187	High	0.0002194	0.0004895
High	[R].DVATSPISPTENNTTPPDALTR.[N]	1xTMT6plex [N-Term]; 1xPhospho [T/S]		0.000288937	0	1	2	13	190886457	190886457 [216-237]	0	2606.25	T4(Phospho): 49.89; S5(Phospho): 49.89	219.4	194.7	197.4	205.9	210.2	236.2	152.8	231.9	212.3	170.5	30.95	5.16	5.78	25.08	15.72	24.74	29.56	11.33	19.17	11.34		144.9	277.8				Unique	4.1827	High	0	0.0003075
High	[R].GLGVGFGSGGGSSSSVK.[F]	2xTMT6plex [N-Term; K17]; 2xPhospho [S8(100); S14(96.4)]	119395754 2xPhospho [S567(100); S571(100)]	0.000139492	0	1	1	55	119395754	119395754 [560-576]	0	2057.97	S8(Phospho): 100; S12(Phospho): 100	1734.3	1626.8	1497.6	1068.4	680.4	1590	8896.2	1467.9	1243.2	2678.9	55.82	61.55	60.2	54.19	50.43	40.14	53.83	52.76	59.34	66.97							Unique	6.40075	High	0	0.0001163
High	[R].GLGVGFGSGGGSSSSVK.[F]	2xTMT6plex [N-Term; K17]; 1xPhospho [S8(100)]	119395754 1xPhospho [S567(100)]	2.19206e-05	0	1	1	183	119395754	119395754 [560-576]	0	1978	S15(Phospho): 100	4751.6	5645.8	3551.5	3461.8	1508	4197.5	22629.1	2222.3	1782.2	6575.9	116.13	173.71	129.09	142.03	111.08	143.79	144.98	100.64	99.98	178.69		341.1	517.8	6717.3	6049.2	2931.2	Unique	6.31766	High	0	4.774e-06
High	[R].VSITSEVESTSNSPSSSSLQK.[I]	2xTMT6plex [N-Term; K21]; 1xPhospho [S13(100)]	532691750 1xPhospho [S357(100)]	9.76928e-05	0	1	2	2	532691750	532691750 [345-365]	0	2692.33	S13(Phospho): 100	184.2	113.7	132.9	107.4	112	118	182.9	107.3	148.2	135.3	4.07	0.91	23.23	13.55	5.15	7.11	13.94	15.04	4.34	7.39		189.5	178.9				Unique	4.87732	High	0	6.548e-05
High	[K].WGLGLDDEGSSQGEPQSKSPQESR.[R]	2xTMT6plex [N-Term; K18]; 1xPhospho [S]		0.000421363	0	1	7	12	119943104	119943104 [1745-1768]	1	3112.46	S19(Phospho): 99.68	380.8	330.2	282	532.3	367.6	464.8	372.5	406.7	469.3	423.9	45.39	54.73	64.62	76.87	37.86	46.17	70.96	62.33	43.51	31.74		258.6	503				Unique	4.18932	High	0	0.0004283
High	[R].KLSGDQITLPTTVDYSSVPK.[Q]	3xTMT6plex [N-Term; K1; K20]; 1xPhospho [S3(100)]	4758230 1xPhospho [S36(100)]	0.000127716	0	1	1	15	4758230	4758230 [34-53]	1	2916.59	S3(Phospho): 100	248.2	292.4	216.2	319.7	283.7	335.1	347.1	227.2	360.1	305.4	52.79	38.37	49.38	42.57	31.45	31.3	39.3	40.89	25.65	30.72				190.3	441.4		Unique	5.94653	High	0	0.0001011
High	[K].TKPLASVTNANTSSTQAAPVAVTTPTVSSGQATPTSPIKK.[YF]	4xTMT6plex [N-Term; K2; K39; K40]; 1xPhospho [S36(98.4)]		0.000217315	0	1	23	8	767974325	767974325 [374-413]	1	4906.69	T35(Phospho): 50; S36(Phospho): 50	168.4	128.1	205.4	127.9	81.2	138.6	161.8	140.7	112.3	150.7													168.4				Unique	3.80956	High	0	0.0002189
High	[R].EQTLSPTITSGLHNIAR.[S]	1xTMT6plex [N-Term]; 1xPhospho [S5(100)]	970259874 1xPhospho [S1163(100)]	0.0003616	0	1	7	8	970259874	970259874 [1159-1175]	0	2147.11	S5(Phospho): 100	125.9	83.2	204	133	141.2	175.7	118.9	137.6	111.6	124.4	11.36	0.91	18.73	6.76	17.78	10.51	27.43	11.09	4.19	14.55		136	115.8				Unique	4.17392	High	0.0002194	0.0004857
High	[R].SNSSSEAVLGQEELSAQAK.[V]	2xTMT6plex [N-Term; K19]; 1xPhospho [S1(99.7)]	530367457 1xPhospho [S393(99.7)]	0.000100914	0	1	10	7	530367457	530367457 [393-411]	0	2473.22	S1(Phospho): 99.74	191.6	495.5	249	188.4	94.6	189.1	387.9	217.2	212.1	216.9	26.44	23.1	30.37	30.37	19.94	41.05	18.97	20.63	32.61	4.07		227.4	155.7				Unique	5.42313	High	0	7.372e-05
High	[K].EAPAEGEAAEPGSPTAAEGEAASAASSTSSPK.[A]	2xTMT6plex [N-Term; K32]; 2xPhospho [S/T]	153070260 2xPhospho [S134(81.7); S135(81.7)]	0.000190057	0	1	1	11	153070260	153070260 [106-137]	0	3533.56	S23(Phospho): 98.3; S30(Phospho): 99.99	207.3	144.9	339.5	170.2	163.5	439.9	414	238.9	242.2	206.1	13.66	13.17	10.64	40.51	26.97	25.48	5.68	8.7	27.1	8.93		187.3	227.3				Unique	5.24711	High	0	0.0001827
High	[K].MADHLEGLSSDDEETSTDITNFNLEK.[D]	2xTMT6plex [N-Term; K26]; 2xPhospho [S9(100); S/T]	22035565 2xPhospho [S557(100); S/T]	3.62822e-05	0	1	4	26	22035565	22035565 [549-574]	0	3529.54	S9(Phospho): 100; S10(Phospho): 100	1194.6	895.2	770.2	858.3	804.8	854.1	588.5	982.5	698.6	848.3																1194.6	Unique	6.44898	High	0	1.667e-05
High	[K].SSATSGDIWPGLSAYDNSPR.[S]	1xTMT6plex [N-Term]; 1xPhospho [S18(100)]	117938254 1xPhospho [S222(100)]; 7661958 1xPhospho [S222(100)]	2.43711e-05	0	2	8	39	117938254; 7661958	117938254 [205-224]; 7661958 [205-224]	0	2390.09	S18(Phospho): 100	1901.7	1745.5	1916	3583.8	1079.5	1174.4	1608.5	3530.8	2846.8	1441.4	13.5	0.4	3.06	10.35	5.63	10.19	15.2	4.77	0.35	5.39				1720.1	2083.2		Not Unique	6.942	High	0	5.734e-06
High	[K].KPSLVSDLPWEGAAPQSPSFSGSEDSGSPK.[H]	3xTMT6plex [N-Term; K1; K30]; 1xPhospho [S]		4.94315e-05	0	1	1	15	5803177	5803177 [206-235]	0	3811.9	S17(Phospho): 100	118.4	87.6	158.9	95.1	77.3	173.9	91.6	102.8	205.3	148.8														118.4			Unique	4.55497	High	0	1.998e-05
High	[R].RNSSEASSGDFLDLK.[GK]	2xTMT6plex [N-Term; K15]; 1xPhospho [S]		0.000298422	0	1	4	41	7705877	7705877 [85-99]	1	2164.07	S3(Phospho): 99.78	5072.5	11509	8120.7	10811.2	6077.2	5673.3	4844.9	6585.1	16142.3	2945.5	9.55	27.24	2.5	15.92	8.31	12.27	6.41	26.88	28.09	10.81							Unique	5.87219	High	0	0.0003971
High	[R].QPNEGSSSQEEEGPSTSPDAESLFR.[E]	1xTMT6plex [N-Term]; 1xPhospho [S8(99.5)]	530422789 1xPhospho [S170(99.5)]	9.15558e-05	0	1	2	2	530422789	530422789 [163-187]	0	2974.28	S8(Phospho): 99.53	46.8	43.4	54.3	60.6	42.7	62.7	170.1	49.5	61.7	87.4																46.8	Unique	5.1113	High	0	5.86e-05
High	[R].QLHLEGASLELSDDDTESK.[T]	2xTMT6plex [N-Term; K19]; 1xPhospho [S12(100)]	767992184 1xPhospho [S2017(100)]	7.13493e-06	0	1	8	4	767992184	767992184 [2006-2024]	0	2625.27	S12(Phospho): 100	154.6	157.5	79.6	95.4	106.1	185.8	125	160	156.2	121.1																154.6	Unique	6.47116	High	0	6.563e-07
High	[K].EYIPGQPPLSQSSDSSPTRNSEPAGLETPEAK.[V]	2xTMT6plex [N-Term; K32]; 1xPhospho [S/Y/T]		0.000379693	0	1	2	43	62241042	62241042 [871-902]	1	3907.9	S10(Phospho): 19.98; S12(Phospho): 19.98; S13(Phospho): 19.98; S15(Phospho): 19.98; S16(Phospho): 19.98	75.2	78.4	63.6	99.9	61.7	108.7	122.7	104.1	167.4	111.9		44.76	12.09	39.12	6.93	69.95	74.37	55.5	107.16	48.88						75.2	Unique	3.67213	High	0	0.0003983
High	[R].IDEDGENTQIEDTEPMSPVLNSK.[F]	2xTMT6plex [N-Term; K23]; 1xOxidation [M16(100)]; 1xPhospho [T/S]	213972636 1xPhospho [S557(99.4)]	7.09343e-05	0	1	5	5	213972636	213972636 [541-563]	0	3115.44	M16(Oxidation): 100; S17(Phospho): 99.39	194.5	101	143.8	179.4	101.7	166.4	153.6	286.2	137.6	256.7	70.75	38.05	70.34	46.42	36.46	70.03	75.56	99.86	31.93	109.04						353.3	Unique	5.42853	High	0	3.776e-05
High	[K].VDGETASDSESRAESAPLPVSADDTPEVLNR.[A]	1xTMT6plex [N-Term]; 1xPhospho [S7(100)]		0.000199351	0	1	2	9	20143480	20143480 [27-57]	1	3523.63	S7(Phospho): 100	347.1	175.7	254.3	219.8	172.2	327.9	233.3	204.6	202.1	328																347.1	Unique	5.66093	High	0	0.0003289
High	[R].SMVEDLQSEESDEDDSSSGEEAAGK.[T]	2xTMT6plex [N-Term; K25]; 1xPhospho [S18(99.5)]		0.0001342	0	1	5	8	768002470	768002470 [445-469]	0	3169.33	S18(Phospho): 99.49	77.6	109.9	154.8	158.2	107.8	99.3	85.2	105.6	298.6	77.9																77.6	Unique	4.5887	High	0	0.0001275
High	[K].EGHSLEMENENLVENGADSDEDDNSFLK.[Q]	2xTMT6plex [N-Term; K28]; 1xOxidation [M7(100)]; 1xPhospho [S19(100)]	767974553 1xPhospho [S687(100)]	2.83544e-05	0	1	5	7	767974553	767974553 [669-696]	0	3691.6	M7(Oxidation): 100; S19(Phospho): 100	263.9	197.6	266.8	497.5	229.3	217.8	432.4	295.3	232.2	188.9																263.9	Unique	5.36492	High	0	7.5e-06
High	[K].TPDLSNQNSSDQANEEWETASESSDFNER.[R]	1xTMT6plex [N-Term]; 1xPhospho [S24(99.5)]	530364414 1xPhospho [S1502(100)]	8.41503e-05	0	1	18	9	530364414	530364414 [1482-1510]	0	3596.48	S24(Phospho): 99.38	252.1	183.5	317.3	223.1	155	209.7	189.2	207.6	243.8	190																252.1	Unique	5.57117	High	0	0.0001024
High	[K].DSGNWDTSGSELSEGELEKR.[R]	2xTMT6plex [N-Term; K19]; 2xPhospho [S13(100); S/T]	1034615069 2xPhospho [S1018(99.4); S1021(100)]	8.599e-05	0	1	12	13	1034615069	1034615069 [1009-1028]	1	2814.23	S10(Phospho): 100; S13(Phospho): 100	1088.2	1716.5	919.9	2571	1225.3	1190.1	948.3	1932.5	1563.4	1089.4																1088.2	Unique	6.23504	High	0	5.278e-05
High	[K].KVEEDLKADEPSSEESDLEIDK.[E]	4xTMT6plex [N-Term; K1; K7; K22]; 2xPhospho [S]		0.000234695	0	1	3	2	19923193	19923193 [64-85]	2	3581.76	S12(Phospho): 66.67; S13(Phospho): 66.67; S16(Phospho): 66.67	284.7	416.6	338.7	234.5	504.6	148.9	250.5	162.7	151	120.9																284.7	Unique	5.274	High	0	0.000314
High	[K].SSQSEGIFLGSESDEDSVR.[T]	1xTMT6plex [N-Term]; 1xPhospho [S11(100)]	767923052 1xPhospho [S347(100)]	0.000377079	0	1	6	2	767923052	767923052 [337-355]	0	2338.03	S11(Phospho): 100	170.7	120.8	142.1	122.4	128.8	173.4	123.8	170.6	166	182.1																170.7	Unique	3.97879	High	0	0.0003962
High	[R].VIGQDHDFSESSEEEAPAEASSGALR.[S]	1xTMT6plex [N-Term]; 2xPhospho [S]		7.74606e-06	0	1	6	10	122939208	122939208 [399-424]	0	3107.31	S11(Phospho): 100; S12(Phospho): 100	480.5	312.5	488.4	824	345.6	368	368.8	357.9	424.4	475.9																480.5	Unique	6.995	High	0	7.59e-07
High	[K].DSDQVAQSDGEESPAAEEQLLGEHIK.[E]	2xTMT6plex [N-Term; K26]; 1xPhospho [S]		0.000153589	0	1	4	6	970259874	970259874 [520-545]	0	3320.56	S8(Phospho): 100	61.5	54.3	64.5	65	84.9	72.6	60.4	62.8	70.3	91.1																61.5	Unique	4.69925	High	0	0.0001345
High	[R].AAGDSGEDSDDSDYENLIDPTEPSNSEYSHSK.[D]	2xTMT6plex [N-Term; K32]; 1xPhospho [S/Y/T]	148529023 1xPhospho [S375(100)]	2.1968e-05	0	1	2	5	148529023	148529023 [364-395]	0	3969.67	S12(Phospho): 100	148	53.9	258.5	143.7	72.9	86.6	113.2	116.9	132.8	86																148	Unique	6.27845	High	0	4.79e-06
High	[R].KPISDNSFSSDEEQSTGPIK.[Y]	3xTMT6plex [N-Term; K1; K20]; 2xPhospho [S9(99.3); S10(99.3)]	87116683 2xPhospho [S1303(99.3); S1304(99.3)]	5.44841e-05	0	1	1	7	87116683	87116683 [1295-1314]	0	3013.44	S9(Phospho): 100; S10(Phospho): 100	552.9	736.9	504.6	687.5	355.4	519.7	419.4	749.7	647	543.3																552.9	Unique	5.12668	High	0	2.376e-05
High	[R].VSDPISTSESSEEEEEAEAETAK.[A]	2xTMT6plex [N-Term; K23]; 2xPhospho [T/S]	530380671 2xPhospho [S87(99.5); S88(99.5)]; 207113162 2xPhospho [S87(99.5); S88(99.5)]; 530380673 2xPhospho [S87(99.5); S88(99.5)]	0.000107446	0	3	19	27	530380671; 207113162; 530380673	530380671 [78-100]; 207113162 [78-100]; 530380673 [78-100]	0	3072.31	S10(Phospho): 99.55; S11(Phospho): 100	688.1	515.5	785.8	1781.3	578.7	991.6	785.7	1387.1	1528.2	635.2																688.1	Not Unique	5.60438	High	0	7.653e-05
High	[R].VSDPISTSESSEEEEEAEAETAK.[A]	2xTMT6plex [N-Term; K23]; 1xPhospho [S/T]		5.68924e-05	0	3	19	16	530380671; 207113162; 530380673	530380671 [78-100]; 207113162 [78-100]; 530380673 [78-100]	0	2992.34	S10(Phospho): 99.57	361.3	440	441.5	1059.9	363.9	568.1	364.8	776.1	1097.3	267.6																361.3	Not Unique	6.31783	High	0	2.568e-05
High	[R].EKEPSYPMPVQETQAPESPGENSEQALQTLSPR.[A]	2xTMT6plex [N-Term; K2]; 1xOxidation [M8(100)]; 1xPhospho [S18(99.2)]	83776598 1xPhospho [S152(99.2)]	2.50118e-05	0	1	1	2	83776598	83776598 [135-167]	1	4209.01	M8(Oxidation): 100; S18(Phospho): 99.24	97	85.6	86.9	52.6	43.9	76	65.1	76.8	78.9	97.3																97	Unique	6.5603	High	0	6.022e-06
High	[R].EKEPSYPMPVQETQAPESPGENSEQALQTLSPR.[A]	2xTMT6plex [N-Term; K2]; 1xPhospho [S18(100)]	83776598 1xPhospho [S152(100)]	3.6102e-06	0	1	1	1	83776598	83776598 [135-167]	1	4193.02	S18(Phospho): 100	90.6	65	85			129.9	31.8			114.1																	Unique	5.91211	High	0	1.974e-07
High	[R].IHDLEDDLEMSSDASDASGEEGGR.[V]	1xTMT6plex [N-Term]; 1xOxidation [M10(100)]; 1xPhospho [S18(99.1)]	156104891 1xPhospho [S224(99.1)]	0.000258205	0	1	1	1	156104891	156104891 [207-230]	0	2860.17	M10(Oxidation): 100; S18(Phospho): 99.1																											No Quan Values	3.97961	High	0	0.0002711
High	[K].DYLLSESEDEGDNDGER.[K]	1xTMT6plex [N-Term]; 1xPhospho [S/Y]	21361348 1xPhospho [S31(99.6)]	0.000392239	0	1	2	5	21361348	21361348 [25-41]	0	2251.91	S7(Phospho): 100	441.7	274.8	347.5	455	323.9	292.9	383.3	635.9	385.7	301																441.7	Unique	4.86323	High	0	0.0004078
High	[R].IHDLEDDLEMSSDASDASGEEGGR.[V]	1xTMT6plex [N-Term]; 1xPhospho [S18(100)]	156104891 1xPhospho [S224(100)]	4.54333e-05	0	1	1	3	156104891	156104891 [207-230]	0	2844.17	S18(Phospho): 100	121.5	80.8	252	100.2	89.1	139	104	97.1	194.3	117.2																121.5	Unique	5.25803	High	0	1.724e-05
High	[K].TESGEETDLISPPQEEVK.[S]	2xTMT6plex [N-Term; K18]; 1xPhospho [S/T]	332205947 1xPhospho [S298(99.6)]	0.000212485	0	1	3	9	332205947	332205947 [296-313]	0	2526.23	S3(Phospho): 99.64	455	583.2	413.1	436.6	772.9	758.6	544.7	573.4	712.3	441																455	Unique	6.68878	High	0	0.0002123
High	[K].IEIIQPLLDMAAGTSNAAPVAENVTNNEGSPPPPVK.[V]	2xTMT6plex [N-Term; K36]; 1xPhospho [S30(100)]	40789229 1xPhospho [S154(97.5)]	3.80253e-06	0	1	9	6	40789229	40789229 [125-160]	0	4193.16	S30(Phospho): 100	479.4	86.2	125.4	133.8	149.9	92.8	84.8	162.7	140.7	114.1																	Unique	6.60909	High	0	2.164e-07
High	[R].VPAEDETQSIDSEDSFVPGR.[R]	1xTMT6plex [N-Term]; 1xPhospho [S12(100)]	62865649 1xPhospho [S229(100)]	0.000297295	0	1	1	1	62865649	62865649 [218-237]	0	2487.11	S12(Phospho): 100	92.7	71	101.4	78.2	82.1	115.7	76.7	90.1	80.9	130.4																92.7	Unique	4.13301	High	0	0.0003177
High	[K].TPETVVPTAPELQPSTSTDQPVTPEPTSQATR.[G]	1xTMT6plex [N-Term]; 1xPhospho [T23(100)]	530382821 1xPhospho [T1487(100)]	0.000212485	0	1	9	2	530382821	530382821 [1465-1496]	0	3671.79	T23(Phospho): 100	122	109.2	166.2	111.8	138.8	116.3	125.8	115	125.6	133.2																122	Unique	4.76915	High	0	0.0002124
High	[K].VQGEAVSNIQENTQTPTVQEESEEEEVDETGVEVK.[D]	2xTMT6plex [N-Term; K35]; 2xPhospho [T15(99.6); T/S]	578823762 2xPhospho [T2022(99.6); T/S]	5.96257e-06	0	1	6	1	578823762	578823762 [2008-2042]	0	4479.03	T15(Phospho): 99.57; T17(Phospho): 50.21; S22(Phospho): 50.21	135.7	91	96.3	82.8	74.1	90.9	428.2	80.4	110	112.4																135.7	Unique	6.3671	High	0	4.785e-07
High	[K].VQGEAVSNIQENTQTPTVQEESEEEEVDETGVEVK.[D]	2xTMT6plex [N-Term; K35]; 1xPhospho [S/T]		5.74733e-06	0	1	6	79	578823762	578823762 [2008-2042]	0	4399.06	T15(Phospho): 33.27; T17(Phospho): 33.27; S22(Phospho): 33.27	484.2	270.4	794.2	620	242.8	413.3	371.4	340.2	583.1	925.7	34.28	49.12	86.48	43.3	29.48	44.93	50.1	36.86	60.58	122.57						656	Unique	5.92711	High	0	6.762e-07
High	[R].EWYQSTIPQSPSPAPDDPEEGR.[Q]	1xTMT6plex [N-Term]; 1xPhospho [T6(99.1)]	157277988 1xPhospho [T711(99.1)]	0.000277517	0	1	15	1	157277988	157277988 [706-727]	0	2795.24	T6(Phospho): 99.07	102.6	87.9	97.7	92.5	92.3	111.7	86.4	167.2	125	146.2																102.6	Unique	4.89416	High	0	0.0002943
High	[K].ASSSPEPPAVAELSDSGQQEPEDGGPAPGEASQGSDSEGGAQGLASASR.[D]	1xTMT6plex [N-Term]; 1xPhospho [S]		6.63346e-05	0	1	4	7	530412646	530412646 [1166-1214]	0	4918.16	S35(Phospho): 50; S37(Phospho): 50	136.7	63.4	137.2	104.6	79.6	91.8	117.5	121.7	103.5	78.7																136.7	Unique	6.01618	High	0	3.359e-05
High	[K].LASVPAGGAVAVSAAPGSAAPAAGSAPAAAEEK.[K]	2xTMT6plex [N-Term; K33]; 1xPhospho [S25(100)]	4506671 1xPhospho [S79(100)]	8.9345e-06	0	1	1	13	4506671	4506671 [62-94]	0	3312.72	S25(Phospho): 100	191.3	268.2	213.4	253.1	100.9	249.2	154.1	223.4	192	161	85.24	64.78	73.45	61.45	16.39	59.62	48.9	76.92	45.64	55.48						88.9	Unique	6.1535	High	0	9.784e-07
High	[K].YGPADVEDTTGSGATDSKDDDDIDLFGSDDEEESEEAKR.[L]	3xTMT6plex [N-Term; K18; K38]; 1xPhospho [S28(100)]	4503477 1xPhospho [S106(99.4)]	5.79727e-06	0	1	1	37	4503477	4503477 [79-117]	2	4948.18	S28(Phospho): 100	1114.7	582.3	833.3	1039.9	742.2	1044.6	990.4	828	975.1	1143.1																1114.7	Unique	6.87011	High	0	4.565e-07
High	[K].IHVSDQELQSANASVDDSRLEELK.[A]	2xTMT6plex [N-Term; K24]; 1xPhospho [S4(100)]	1034675091 1xPhospho [S861(100)]	0.000117659	0	1	5	1	1034675091	1034675091 [858-881]	1	3221.61	S4(Phospho): 100	118.2	94.9	103.1	115.4	93.6	111.7	76.7	85.9	110.2	93																118.2	Unique	5.83592	High	0	8.869e-05
High	[K].IEIIQPLLDMAAGTSNAAPVAENVTNNEGSPPPPVK.[V]	2xTMT6plex [N-Term; K36]; 1xOxidation [M10(100)]; 1xPhospho [S30(100)]		9.56845e-07	0	1	9	10	40789229	40789229 [125-160]	0	4209.16	M10(Oxidation): 100; S30(Phospho): 100	2245.2	856.1	1510.2	1531.9	461.8	1045.4	895.2	1358.6	823.6	744.7	38.2	24.98	67.67	43.06	46.97	54.13	40.83	58.04	62.69	20.92							Unique	8.52648	High	0	1.899e-08
High	[R].ASPATQPPPLLPPSATGPDATVGGPAPTPLLPPSATASVK.[M]	2xTMT6plex [N-Term; K40]; 1xPhospho [S2(100)]	5730027 1xPhospho [S58(100)]	7.75112e-05	0	1	2	5	5730027	5730027 [57-96]	0	4265.29	S2(Phospho): 100	2001.7	21441.3	17210.1	3314.4	30305.6	10834.4	8116.1	3738.9	7763.5	9574.1	16.15	56.64	73.19	29.48	102.9	84.16	52.45	29.87	56.55	83.41							Unique	6.82357	High	0	0.0001025
High	[R].LALDGETLGEEEQEDEQPPWASPSPTSR.[Q]	1xTMT6plex [N-Term]; 1xPhospho [S24(99.6)]	355390315 1xPhospho [S1439(98.2)]	4.00249e-07	0	1	2	13	355390315	355390315 [1416-1443]	0	3377.53	S24(Phospho): 99.67	1379.2	1471.2	2582.2	1098.3	1275.5	1251.9	1347.8	1035.5	1191.5	1517.3	23.32	41.28	39.32	37.91	14.77	4.46	46.93	12.49	20.66	14.07							Unique	8.09266	High	0	4.081e-09
High	[K].GIPLATGDTSPEPELLPGAPLPPPK.[E]	2xTMT6plex [N-Term; K25]; 1xPhospho [T/S]		0.000107446	0	1	1	6	49472822	49472822 [33-57]	0	3002.63	T9(Phospho): 50; S10(Phospho): 50	1677.7	2950.1	3656.7	3615.3	2516.3	2317.8	2152	1939.1	3087.9	2330.6																	Unique	4.60786	High	0	7.665e-05
High	[R].SQSSHSYDDSTLPLIDR.[N]	1xTMT6plex [N-Term]; 2xPhospho [S/Y/T]	146231940 2xPhospho [S861(99.5); S864(100)]	0.000442213	0	1	15	18	146231940	146231940 [859-875]	0	2309.99	S3(Phospho): 99.57; S6(Phospho): 100	406.2	2093.5	736.1	1573.8	398.1	901.3	1684.6	534.5	551.2	620.9																406.2	Unique	5.62311	High	9.533e-05	0.0004696
High	[R].SISQSSTDSYSSAASYTDSSDDETSPR.[D]	1xTMT6plex [N-Term]; 1xPhospho [S20(99.5)]	24308043 1xPhospho [S166(99.5)]	0.000105603	0	1	5	2	24308043	24308043 [147-173]	0	3140.29	S20(Phospho): 99.53		156.8		195.4		179.7		215.5																			Unique	4.62429	High	0	7.448e-05
High	[K].ALTDDSDENEEEDAFTDQK.[I]	2xTMT6plex [N-Term; K19]; 1xPhospho [S6(100)]	767901811 1xPhospho [S1212(100)]	0.00038166	0	1	15	6	767901811	767901811 [1207-1225]	0	2710.17	S6(Phospho): 100	450.2	195.9	544.1	466.1	422.5	357.7	295.9	340.2	205.7	326.6																450.2	Unique	5.53299	High	0	0.0003997
High	[K].WEEDSESSSEESSDSSDGEVPTAVAPAQEK.[S]	2xTMT6plex [N-Term; K30]; 2xPhospho [S/T]		0.000208171	0	3	19	25	530380671; 207113162; 530380673	530380671 [541-570]; 207113162 [541-570]; 530380673 [541-570]	0	3787.57	S12(Phospho): 49.72; S13(Phospho): 49.72; S15(Phospho): 49.72; S16(Phospho): 49.72	82.3	108.4	145.7	161.3	80.6	94.9	97.5	131.7	130.2	109.3																82.3	Not Unique	4.90429	High	0	0.0002068
High	[K].WEEDSESSSEESSDSSDGEVPTAVAPAQEK.[S]	2xTMT6plex [N-Term; K30]; 1xPhospho [S/T]		2.52838e-05	0	3	19	106	530380671; 207113162; 530380673	530380671 [541-570]; 207113162 [541-570]; 530380673 [541-570]	0	3707.6	S12(Phospho): 98.01	684.8	981.9	692.7	1228	545	797.7	510.9	811.3	886.4	531.5																684.8	Not Unique	5.38782	High	0	1.422e-05
High	[R].VVVISSSEDSDAENSVSGPEVQPR.[T]	1xTMT6plex [N-Term]; 1xPhospho [S]		0.000115143	0	1	1	8	67089157	67089157 [556-579]	0	2796.31	S6(Phospho): 49.77; S10(Phospho): 49.77	103.1	146.6	94.9	103.4	100.8	136.8	89.9	81.6	159	158.8																103.1	Unique	5.42266	High	0	8.567e-05
High	[R].EFITGDVEPTDAESEWHSENEEEEK.[L]	2xTMT6plex [N-Term; K25]; 1xPhospho [S18(100)]	5174613 1xPhospho [S125(100)]	1.6656e-05	0	1	1	49	5174613	5174613 [108-132]	0	3474.52	S18(Phospho): 100	1912.5	2804	6811.5	2261.9	2664.1	3488.2	2199	2362.3	3682.8	1408.7																1912.5	Unique	6.33689	High	0	2.937e-06
High	[K].GDVEGSQSQDEGEGSGESER.[G]	1xTMT6plex [N-Term]; 1xPhospho [S]		0.000103791	0	1	1	16	4885399	4885399 [1060-1079]	0	2347.94	S8(Phospho): 100	627.1	776.3	677	844.9	1358.4	807.4	599	1111.4	906.2	974.1	75.35	18.33	57.86	43.05	18.04	49.09	17.47	13.76	28.03	20.99							Unique	4.89821	High	0	7.238e-05
High	[R].LKSVEDEMDSPGEEPFYTGQGR.[S]	2xTMT6plex [N-Term; K2]; 2xPhospho [S3(100); S10(100)]	224465184 2xPhospho [S325(100); S332(100)]	0.000208599	0	1	9	4	224465184	224465184 [323-344]	1	3089.36	S3(Phospho): 100; S10(Phospho): 100	181.6	106.3	271.9	148	122	128.8	582.5	140.5	166.3	295.1																181.6	Unique	5.81126	High	0	0.0002073
High	[R].TGSNISGASSDISLDEQYK.[H]	2xTMT6plex [N-Term; K19]; 1xPhospho [S10(99.5)]	4505531 1xPhospho [S386(99.5)]	0.000388917	0	1	1	2	4505531	4505531 [377-395]	0	2510.21	S10(Phospho): 99.52	223.2	246.4	220.8	136.7	182.9	180.9	240.3	120.8	156.7	121.1																223.2	Unique	5.21681	High	0	0.0004057
High	[K].ILEGDNGMDSDMEEEADDGSK.[M]	2xTMT6plex [N-Term; K21]; 1xOxidation [M8(100)]; 1xPhospho [S10(100)]	262527223 1xPhospho [S203(100)]	0.000124991	0	1	2	3	262527223	262527223 [194-214]	0	2811.16	M8(Oxidation): 100; S10(Phospho): 100	110.7	64.1	98.3	107.9	72.4	72.3	73.2	126.3	74.7	106.8																110.7	Unique	4.63044	High	0	9.786e-05
High	[K].TINNQHSVESQDNDQPDYDSVASDEDTDLETTASK.[T]	2xTMT6plex [N-Term; K35]; 2xPhospho [S10(100); T27(97.3)]	17149830 2xPhospho [S384(100); T401(97.3)]	4.77503e-05	0	1	18	4	17149830	17149830 [375-409]	0	4486.9	S10(Phospho): 99.99; T27(Phospho): 97.31	33.1	22.4	27.8	29	15	19.2	56.9	26.7	20.2	14.1																33.1	Unique	5.35072	High	0	1.883e-05
High	[K].GPTTGEGALDLSDVHSPPKSPEGK.[T]	3xTMT6plex [N-Term; K19; K24]; 2xPhospho [S16(100); S20(100)]	5901954 2xPhospho [S156(100); S160(100)]	2.08118e-05	0	1	2	2	5901954	5901954 [141-164]	1	3223.59	S16(Phospho): 100; S20(Phospho): 100	321.1	261.7	458.3	320.5	270.3	362.1	322.4	364.5	572.2	312.6																321.1	Unique	7.41861	High	0	4.353e-06
High	[R].GQTPLTEGSEDLDGHSDPEESFAR.[D]	1xTMT6plex [N-Term]; 1xPhospho [S16(100)]	30023820 1xPhospho [S320(100)]	3.66767e-05	0	1	2	2	30023820	30023820 [305-328]	0	2883.25	S16(Phospho): 100	270	302.4	321	311.3	290	366.7	349.3	275.9	341.6	319.9																270	Unique	5.52906	High	0	1.182e-05
High	[K].VQIPVSRPDPEPVSDNEEDSYDEEIHDPR.[S]	1xTMT6plex [N-Term]; 1xPhospho [S20(99.4)]	1034591669 1xPhospho [S224(99.4)]	0.000237539	0	1	19	5	1034591669	1034591669 [205-233]	0	3672.65	S20(Phospho): 99.39	167.9	120.4	219.3	184.5	124.5	108	193.2	133.2	168.4	182.4																167.9	Unique	4.82715	High	0	0.0002447
High	[R].GESAPTLSTSPSPSSPSPTSPSPTLGR.[R]	1xTMT6plex [N-Term]; 1xPhospho [S22(99.4)]	110681719 1xPhospho [S332(100)]	1.82397e-05	0	1	6	5	110681719	110681719 [311-337]	0	2891.39	S22(Phospho): 100	155.1	193.1	189.5	198	266.8	214.7	175.9	217.6	214	205.7																155.1	Unique	6.77391	High	0	3.44e-06
High	[K].ETSSPGTDDVFTPAPSDSPSSQR.[I]	1xTMT6plex [N-Term]; 1xPhospho [S18(99.5)]	27777632 1xPhospho [S785(99.5)]	0.000287285	0	1	2	9	27777632	27777632 [768-790]	0	2674.17	S18(Phospho): 99.53	428	465.5	485	436.9	365.4	477.8	372.6	353.9	445.4	328.6																428	Unique	5.54086	High	0	0.0003058
High	[R].VVNTDHGSPEQLQIPVTDSGR.[H]	1xTMT6plex [N-Term]; 1xPhospho [S8(100)]	148664216 1xPhospho [S278(100)]	9.01802e-05	0	1	1	2	148664216	148664216 [271-291]	0	2558.24	S8(Phospho): 100	334.4	475.2	450	323.8	251.3	296.3	298.9	247.4	334.6	427																334.4	Unique	5.52719	High	0	5.724e-05
High	[R].SQSGTLDGESAAWSASGEDSR.[G]	1xTMT6plex [N-Term]; 1xPhospho [S3(100)]	1034595817 1xPhospho [S1492(100)]	3.67561e-05	0	1	18	4	1034595817	1034595817 [1490-1510]	0	2407.02	S3(Phospho): 100	254	384.9	240.6	303.8	314.7	352.5	251.5	265.9	397.9	323.5																254	Unique	6.63877	High	0	7.733e-05
High	[R].TVSPGSVSPIHGQGQVVENLK.[A]	2xTMT6plex [N-Term; K21]; 2xPhospho [S3(100); S8(100)]	194294521 2xPhospho [S884(99); S889(99.5)]	0.000385609	0	1	3	13	194294521	194294521 [882-902]	0	2751.39	S3(Phospho): 100; S8(Phospho): 100	1263.3	864.7	2622	595.8	1148.3	1481.8	1206.5	1020.7	1809.2	3087.5	6.03	12.25	8.44	9.33	16.44	16.58	14.88	15.3	15.11	9.17							Unique	5.39484	High	0	0.0004164
High	[R].RLSPPSSSAASSYSFSDLNSTR.[G]	1xTMT6plex [N-Term]; 1xPhospho [S3(100)]	4557553 1xPhospho [S49(100)]	2.82932e-05	0	1	1	9	4557553	4557553 [47-68]	1	2626.23	S3(Phospho): 100	378.8	339.1	521.2	441.3	400.7	396.8	430.3	314.6	538.5	413.8	61.35	48.26	71.11	61.97	53.55	59.83	59.73	53.51	67.72	59.32						126.3	Unique	6.47383	High	0	7.485e-06
High	[R].GSGSGGSGSDSEPDSPVFEDSK.[A]	2xTMT6plex [N-Term; K22]; 1xPhospho [S11(100)]	52630419 1xPhospho [S487(100)]	0.000164748	0	1	4	1	52630419	52630419 [477-498]	0	2623.14	S11(Phospho): 100	228.4	418	162.5	155.8	488.4	237	223.5	239.8	192.2	238.4																228.4	Unique	4.89441	High	0	0.0001492
High	[K].QEPLEEDSPSSSSAGLDK.[A]	2xTMT6plex [N-Term; K18]; 1xPhospho [S8(100)]	578802800 1xPhospho [S247(100)]	0.000351484	0	1	4	2	578802800	578802800 [240-257]	0	2414.14	S8(Phospho): 100	288.5	673.5	447.2	311.3	244.3	336	389.8	332.4	471.1	330.8																288.5	Unique	4.52448	High	0	0.0003733
High	[K].REVLYDSEGLSGEER.[G]	1xTMT6plex [N-Term]; 2xPhospho [S7(100); S11(100)]	768010386 2xPhospho [S737(100); S741(100)]	0.000383632	0	1	3	2	768010386	768010386 [731-745]	1	2127.92	S7(Phospho): 100; S11(Phospho): 100	268.6	184.5	318.2	260.1	242.1	246.3	257.3	238.9	260.4	393.8																268.6	Unique	5.46005	High	0	0.0004016
High	[K].NIDDASQMDLFHRDSDDDQTEEQLDESEAR.[W]	1xTMT6plex [N-Term]; 1xOxidation [M8(100)]; 1xPhospho [S15(100)]	21735569 1xPhospho [S1156(100)]	0.000371232	0	1	6	1	21735569	21735569 [1142-1171]	1	3849.59	M8(Oxidation): 100; S15(Phospho): 99.99	90.8	87.9	79.3	88.1	106.3	93.4	83.9	109	124.5	115																90.8	Unique	4.29689	High	0	0.0003911
High	[K].FSGEEGEIEDDESGTENREEKDNIQPTTE.[-]	2xTMT6plex [N-Term; K21]; 1xPhospho [S/T]		0.000196482	0	1	3	11	1009287565	1009287565 [927-955]	2	3822.68	S13(Phospho): 50; T15(Phospho): 50	790.7	242.9	1117.7	1111.4	422	505.4	553.2	964.6	708.7	504.2																790.7	Unique	5.28976	High	0	0.000191
High	[K].AAGDTTVIENSDVSPETESSEK.[E]	2xTMT6plex [N-Term; K22]; 1xPhospho [S14(100)]	1034587017 1xPhospho [S1313(100)]	0.000131061	0	1	10	1	1034587017	1034587017 [1300-1321]	0	2804.31	S14(Phospho): 100																											No Quan Values	4.67005	High	0	0.0001055
High	[R].SLSNSNPDISGTPTSPDDEVR.[S]	1xTMT6plex [N-Term]; 1xPhospho [S5(100)]	767906494 1xPhospho [S900(100)]	0.000121533	0	1	11	2	767906494	767906494 [896-916]	0	2497.13	S5(Phospho): 100	249.7	332.7	313.7	234.7	343.6	331.4	309.4	309.3	269	213.3																249.7	Unique	6.39662	High	0	9.359e-05
High	[R].GGQGDPAVPTQQPADPSTPEQQNSPSGSEQFVR.[R]	1xTMT6plex [N-Term]; 1xPhospho [T18(99.5)]		6.91171e-05	0	3	28	20	1034675225; 1034675223; 1034675227	1034675225 [572-604]; 1034675223 [573-605]; 1034675227 [545-577]	0	3702.69	S24(Phospho): 98.83	821.5	522.7	832.2	665.6	562.8	627.3	930.5	577.9	791.4	585.8																821.5	Not Unique	5.91322	High	0	6.364e-05
High	[K].TNSPAYSDISDAGEDGEGK.[V]	2xTMT6plex [N-Term; K19]; 1xPhospho [S3(100)]	767983685 1xPhospho [S842(100)]	0.000224957	0	1	1	2	767983685	767983685 [840-858]	0	2451.1	S3(Phospho): 100	248.3	430.4	284.7	338.1	267.3	365.8	252.5	397.6	392	236.4																248.3	Unique	6.34309	High	0	0.0002286
High	[K].GHYEVTGSDDETGKLQGSGVSLASK.[K]	3xTMT6plex [N-Term; K14; K25]; 1xPhospho [T6(99.4)]	1034575326 1xPhospho [T5772(99.4)]	0.000138894	0	1	5	2	1034575326	1034575326 [5767-5791]	1	3289.66	T6(Phospho): 99.43	159.9	142.8	249.2	121	128.8	187.1	210.5	116.6	186.5	178.2																159.9	Unique	5.66549	High	0	0.0001155
High	[R].YSDTTDSDPENEPFDEDQHTQITK.[V]	2xTMT6plex [N-Term; K24]; 1xPhospho [S7(100)]	799322616 1xPhospho [S558(100)]	0.000203931	0	1	3	2	799322616	799322616 [552-575]	0	3350.46	S7(Phospho): 100	171.2	148.7	272.2	214.7	154.7	121.6	204.9	186.4	154.3	188.9																171.2	Unique	5.43957	High	0	0.0002012
High	[K].ILEGDNGMDSDMEEEADDGSK.[M]	2xTMT6plex [N-Term; K21]; 2xOxidation [M8(100); M12(100)]; 1xPhospho [S10(100)]	262527223 1xPhospho [S203(100)]	0.000247705	0	1	2	3	262527223	262527223 [194-214]	0	2827.16	M8(Oxidation): 100; S10(Phospho): 100; M12(Oxidation): 100	435.1	294.6	404.3	502.3	278	340	298.1	653.2	495.2	448.9																435.1	Unique	4.98451	High	0	0.0002577
High	[R].AESPESSAIESTQSTPQK.[G]	2xTMT6plex [N-Term; K18]; 1xPhospho [S3(100)]	1034584020 1xPhospho [S1359(100)]	0.000117659	0	1	5	8	1034584020	1034584020 [1357-1374]	0	2415.17	S3(Phospho): 100	692.6	3083.4	3772.7	3151	3970	1132.8	2278.2	6537.9	4320.7	1971.8	18.21	10.67	26.51	13.01	4.67	11.5	8.99	14.51	30.4	18.29							Unique	5.8339	High	0	0.0001321
High	[R].ESDKEEPVTPTSGGGPMSPQDDEAEEESDNELSSGTGDVSK.[D]	3xTMT6plex [N-Term; K4; K41]; 1xPhospho [S28(99.5)]	530365778 1xPhospho [S490(99.5)]	3.2353e-05	0	1	5	4	530365778	530365778 [463-503]	1	4991.22	S28(Phospho): 99.56	233.2	102.5	163.1	163	143.2	181.5	147.8	174.8	183.7	150.1																233.2	Unique	6.21338	High	0	9.477e-06
High	[K].ILEGDNGMDSDMEEEADDGSK.[M]	2xTMT6plex [N-Term; K21]; 1xPhospho [S10(100)]	262527223 1xPhospho [S203(100)]	0.000352112	0	1	2	1	262527223	262527223 [194-214]	0	2795.17	S10(Phospho): 100	82.3	48.1	95.2	71.7	80.1	72.9	61.1	106.8	82.2	90.5																82.3	Unique	4.01774	High	0	0.0003742
High	[R].GQPGNAYDGAGQPSAAYLSMSQGAVANANSTPPPYER.[T]	1xTMT6plex [N-Term]; 1xOxidation [M20(100)]; 1xPhospho [S/T/Y]	5454064 1xPhospho [T572(99.2)]	0.000190057	0	1	1	33	5454064	5454064 [542-578]	0	4019.81	M20(Oxidation): 100; T31(Phospho): 99.15	29.3	55.8	144.8	20.8	97.7	119.1	117.4	208.5	99.7	73.5		86.47	110.34		110.71	112.68	90.73	117.12	110.89	65.14						29.3	Unique	4.8143	High	0	0.0001825
High	[R].SNSIDGSNVTVTPGPGEQTVDVEPR.[I]	1xTMT6plex [N-Term]; 1xPhospho [S3(100)]	1034650823 1xPhospho [S778(100)]	1.98448e-05	0	1	12	1	1034650823	1034650823 [776-800]	0	2864.35	S3(Phospho): 100	122.5	103.4	152.6	103.6	131.3	211.6	93.5	148.1	243.1	392.7																122.5	Unique	8.03702	High	0	3.997e-06
High	[K].AIPVSPSAVEEDEDEDGHTVVATAR.[G]	1xTMT6plex [N-Term]; 1xPhospho [S5(99.5)]	1034591669 1xPhospho [S1727(99.5)]	3.43726e-05	0	1	20	3	1034591669	1034591669 [1723-1747]	0	2903.35	S5(Phospho): 99.47	105.5	80.8	208.3	68.8	74.4	118.5	136	56.5	101.7	172.3																105.5	Unique	7.08224	High	0	1.339e-05
High	[K].KAENAEGQTPAIGPDGEPLDETSQMSDLPVK.[V]	3xTMT6plex [N-Term; K1; K31]; 1xOxidation [M25(100)]; 1xPhospho [S26(100)]	768003541 1xPhospho [S613(100)]	7.31148e-05	0	1	11	2	768003541	768003541 [588-618]	1	4007.98	M25(Oxidation): 100; S26(Phospho): 100																											No Quan Values	4.54269	High	0	3.987e-05
High	[K].DLSEVSETTESTDVKDSSEASDSAS.[-]	2xTMT6plex [N-Term; K15]; 1xPhospho [S25(98.9)]	10835057 1xPhospho [S235(96.6)]	0.000335409	0	1	3	6	10835057	10835057 [211-235]	1	3114.38	S25(Phospho): 98.86	280	116.5	257.1	287.6	117.8	229.6	196.4	237.4	235.5	210																280	Unique	4.89207	High	0	0.0003578
High	[K].GGSYSQAACSDSAQGSDVSLTA.[-]	1xTMT6plex [N-Term]; 1xCarbamidomethyl [C9]; 2xPhospho [S/T/Y]	17986001 2xPhospho [S359(93.8); T361(93.8)]	0.000377079	0	1	2	23	17986001	17986001 [341-362]	0	2507.98	S16(Phospho): 99.28; S19(Phospho): 99.29	350	270.3	273.9	271.4	700.8	314	288.4	264.1	379.5	358.9																350	Unique	4.42071	High	0.0002194	0.0004838
High	[K].ESSTFTDENPSETEESEAAGGIGK.[L]	2xTMT6plex [N-Term; K24]; 1xPhospho [S11(99.7)]	24431975 1xPhospho [S449(99.7)]	0.000285094	0	1	1	2	24431975	24431975 [439-462]	0	3010.35	S11(Phospho): 99.67	218.5	104.6	198.3	179.2	103.6	87.2	115	113.8	138	164.4																218.5	Unique	4.04563	High	0	0.0003031
High	[R].TTITTTTTSSSGLGSPMIVGSPR.[A]	1xTMT6plex [N-Term]; 1xOxidation [M17(100)]; 1xPhospho [T/S]	589269122 1xPhospho [S22(100)]	0.000422051	0	1	1	15	589269122	589269122 [8-30]	0	2577.27	S15(Phospho): 100; M17(Oxidation): 100	574.6	541.3	440.9	603.5	401.5	693.7	445.7	554.5	479.1	606.3																574.6	Unique	4.42349	High	0	0.0004285
High	[R].KGGSYTQAASSDSAQGSDVSLTACKV.[-]	3xTMT6plex [N-Term; K1; K25]; 1xCarbamidomethyl [C24]; 2xPhospho [S17(100); S20(99.2)]	24797067 2xPhospho [S356(100); S359(99.2)]	7.01714e-05	0	1	2	1	24797067	24797067 [340-365]	2	3422.62	S17(Phospho): 100; S20(Phospho): 99.25																											No Quan Values	6.49263	High	0	3.712e-05
High	[R].VSLAGACGVGGYGSR.[S]	1xTMT6plex [N-Term]; 1xCarbamidomethyl [C7]; 1xPhospho [S2(100)]	119395754 1xPhospho [S50(100)]	0.000167208	0	1	1	1	119395754	119395754 [49-63]	0	1719.81	S2(Phospho): 100	97.9	50.1	70.2	35.3	37.4	39.4	60.4	26.4	30.1	50																97.9	Unique	5.26687	High	0	0.0001524
High	[K].KLPPPPPQAPPEEENESEPEEPSGVEGAAFQSR.[L]	2xTMT6plex [N-Term; K1]; 1xPhospho [S17(100)]	578798679 1xPhospho [S166(100)]	4.69006e-06	0	1	3	18	578798679	578798679 [150-182]	1	4064.95	S17(Phospho): 100	405.6	529.4	522.1	535.5	509.3	544.4	444	637.2	637.1	544.6	115.98	101.14	105.68	110.1	106.69	126.06	106.57	98.25	106.56	112.06						738.2	Unique	7.67968	High	0	1.401e-06
High	[R].EPLENSASESSDTELPEK.[E]	2xTMT6plex [N-Term; K18]; 1xPhospho [S/T]		0.000344008	0	1	1	3	152963644	152963644 [41-58]	0	2500.17	S11(Phospho): 49.89; T13(Phospho): 49.89	251.6	184.5	204	152.9	161.2	146.1	111.5	131.4	428	168.4																251.6	Unique	4.28	High	0	0.0003662
High	[K].NRPDYVSEEEEDDEDFETAVK.[K]	2xTMT6plex [N-Term; K21]; 1xPhospho [S7(100)]	530368768 1xPhospho [S2694(100)]	8.99854e-05	0	1	10	5	530368768	530368768 [2688-2708]	0	3054.35	S7(Phospho): 100	795	1097.5	736.4	850.6	1032.9	945.7	739.1	1382.5	953.1	750.7																795	Unique	5.80297	High	0	5.688e-05
High	[R].CSSSSGGGSSGDEDGLELDGAPGGGK.[R]	2xTMT6plex [N-Term; K26]; 1xCarbamidomethyl [C1]; 2xPhospho [S5(99); S]	209969703 2xPhospho [S50(100); S51(100)]	0.00032336	0	1	1	23	209969703	209969703 [42-67]	0	2958.21	S3(Phospho): 49.87; S4(Phospho): 49.87; S9(Phospho): 100	350.4	269.3	390.4	312	1733.2	337.6	324.7	325.4	371.7	327.2																350.4	Unique	5.17493	High	0	0.000392
High	[R].DKEEIFGSDADSEDDADSDDEDR.[G]	2xTMT6plex [N-Term; K2]; 1xPhospho [S8(100)]	42476169 1xPhospho [S456(100)]	0.000151636	0	1	1	1	42476169	42476169 [449-471]	1	3113.26	S8(Phospho): 100	226.5	57.4	176.7	157.5	78.4	139.9	130.3	160.6	126.6	136																226.5	Unique	5.05072	High	0	0.0001319
High	[K].IYHLPDAESDEDEDFKEQTR.[L]	2xTMT6plex [N-Term; K16]; 1xPhospho [S9(100)]	1034614226 1xPhospho [S285(100)]	3.60476e-05	0	1	10	24	1034614226	1034614226 [277-296]	1	2975.37	S9(Phospho): 100	4423.3	5143.8	4082.3	5019.8	4431.5	6471.3	3941.5	6756.4	4838.7	4310.6																4423.3	Unique	6.3876	High	0	1.148e-05
High	[K].GFINDDDDEDEGEEDEGSDSGDSEDDVGHK.[K]	2xTMT6plex [N-Term; K30]; 2xPhospho [S]		0.000222235	0	1	1	2	1034600953	1034600953 [56-85]	0	3846.42	S18(Phospho): 66.67; S20(Phospho): 66.67; S23(Phospho): 66.67																											No Quan Values	3.64225	High	0	0.0002248
High	[K].GFINDDDDEDEGEEDEGSDSGDSEDDVGHK.[K]	2xTMT6plex [N-Term; K30]; 1xPhospho [S23(99.4)]	1034600953 1xPhospho [S78(100)]	2.23031e-05	0	1	1	3	1034600953	1034600953 [56-85]	0	3766.46	S23(Phospho): 100	325.4	144.4	312	271.4	209.9	217.5	227	259.2	318.3	197.6																325.4	Unique	5.8962	High	0	4.906e-06
High	[R].TNPEDIYPSNPTDDDVSSGSSSER.[S]	1xTMT6plex [N-Term]; 1xPhospho [S21(98.7)]	530396004 1xPhospho [S183(98.6)]	0.000233284	0	1	28	21	530396004	530396004 [163-186]	0	2878.21	S21(Phospho): 98.62	412.9	394.9	334.1	870.1	364.6	402.1	881.4	357.5	516.5	467.7																412.9	Unique	5.64024	High	0	0.0002396
High	[K].NQSEEQSEASSEQLDQFTQSAEK.[A]	2xTMT6plex [N-Term; K23]; 1xPhospho [S10(99.2)]	767935680 1xPhospho [S618(99.2)]	0.000192445	0	1	3	2	767935680	767935680 [609-631]	0	3138.42	S10(Phospho): 99.24	123.4	85.6	144.6	310.1	71.1	145.2	91.2	183.9	142.4	109.9																123.4	Unique	4.9061	High	0	0.0001856
High	[K].VEAPSLDVHMDSPDINIEGPDVK.[I]	2xTMT6plex [N-Term; K23]; 1xOxidation [M10(100)]; 1xPhospho [S12(100)]	1034575326 1xPhospho [S4893(100)]	0.00019689	0	1	5	2	1034575326	1034575326 [4882-4904]	0	3031.47	M10(Oxidation): 100; S12(Phospho): 100	168.4	286.7	129.6	112.3	71.9	114.5	289.9	88.3	106.9	121.4																168.4	Unique	4.56226	High	0	0.0001918
High	[R].SQQQQQQQGLAPPAQPPAPPSATLPAGAAAPPSPPFSFQLPR.[R]	1xTMT6plex [N-Term]; 1xPhospho [S33(100)]	15812178 1xPhospho [S426(100)]	2.9781e-06	0	1	1	6	15812178	15812178 [394-435]	0	4566.31	S33(Phospho): 100	890.9	452.9	898.9	1210.1	930.5	831.6	1167.5	1311.9	1007.8	648.6	19.1	39.62	40.49	12.11	23.07	22.16	30.04	20.06	41.54	18.11							Unique	7.27596	High	0	1.408e-07
High	[R].TDEVPAGGSRSEAEDEDDEDYVPYVPLR.[Q]	1xTMT6plex [N-Term]; 1xPhospho [S11(99.6)]	21071032 1xPhospho [S23(99.6)]	3.64395e-05	0	1	1	2	21071032	21071032 [13-40]	1	3419.5	S11(Phospho): 99.59	205.3	83.9	325.3	373.4	128.5	130	299.4	477.4	161.9	133.8																205.3	Unique	5.80109	High	0	1.17e-05
High	[K].YLLSQSSPAPLTAAEEELR.[Q]	1xTMT6plex [N-Term]; 1xPhospho [S7(100)]		0.000350232	0	1	2	4	334848198	334848198 [137-155]	0	2384.19	S7(Phospho): 100	304.1	310.6	232.7	132.8	193.7	149.9	235.8	147.2	124	244.5																304.1	Unique	4.42492	High	0	0.0003924
High	[R].TCNSPQNSTDSVSDIVPDSPFPGALGSDTR.[T]	1xTMT6plex [N-Term]; 1xCarbamidomethyl [C2]; 1xPhospho [S4(99.6)]	440918695 1xPhospho [S215(99.6)]	0.000115642	0	1	3	1	440918695	440918695 [212-241]	0	3430.53	S4(Phospho): 99.56	111.6	64.1	127.6	89.8	132.5	85	69.4	76.8	83.5	71.4																111.6	Unique	5.79464	High	0	8.641e-05
High	[R].SLSTSGESLYHVLGLDK.[N]	2xTMT6plex [N-Term; K17]; 1xPhospho [S3(99.6)]	768018320 1xPhospho [S10(99.6)]	0.000370586	0	1	1	5	768018320	768018320 [8-24]	0	2344.22	S3(Phospho): 99.63	524.5	149.4	460.5	183.3	225.6	372	253.8	246.8	324.5	157.7																524.5	Unique	5.09146	High	0.0002784	0.0005328
High	[R].APPGAPGPGPGSGAPGSQEEEEEPGLVEGDPGDGAIEDPELEAIK.[A]	2xTMT6plex [N-Term; K45]; 1xPhospho [S17(100)]		0.000203511	0	1	1	7	4758876	4758876 [79-123]	0	4844.27	S17(Phospho): 100	656.6	367.7	1002.4	958.5	477.1	664.6	1224.3	643.7	551.1	542.3	92.92	73.8	109.4	132.78	88.93	111.01	135.81	102.6	81.45	95.41						242.6	Unique	6.31956	High	0	0.0004021
High	[R].SDDESPSTSSGSSDADQRDPAAPEPEEQEER.[K]	1xTMT6plex [N-Term]; 1xPhospho [S/T]		2.67462e-05	0	1	4	50	33359694	33359694 [8-38]	1	3614.47	T8(Phospho): 99.14		1569.6	713.5	1350.5		983.9	178.9	430.9	444.1	320.8		102.94		103.41					88.02								Unique	5.46438	High	0	1.713e-05
High	[R].VENMDISDEEEGGAPPPGSPQVLEEDEAELELQK.[Q]	2xTMT6plex [N-Term; K34]; 1xOxidation [M4(100)]; 1xPhospho [S7(100)]	10863889 1xPhospho [S474(100)]	0.000118424	0	1	3	5	10863889	10863889 [468-501]	0	4234.95	M4(Oxidation): 100; S7(Phospho): 100	228.9	261.9	309.7	440	152.5	266.5	325.2	552.4	497.5	331.9																228.9	Unique	5.77061	High	0	8.979e-05
High	[K].VEPISEGESEEVEVTDISDEDEEDGEVFK.[T]	2xTMT6plex [N-Term; K29]; 1xPhospho [T/S]		0.00038166	0	1	2	4	156104872	156104872 [427-455]	0	3778.69	T15(Phospho): 50; S18(Phospho): 50	80.9	57	89.8	118.8	60.1	84.7	70.2	79.5	82.5	69.4																80.9	Unique	3.6859	High	0	0.0003997
High	[R].GEPVDLSCLPPPPDQLPPDPPSPPSQPPTPATAPSTTEVPPPPR.[T]	1xTMT6plex [N-Term]; 1xCarbamidomethyl [C8]; 1xPhospho [S25(99.4)]	530414987 1xPhospho [S327(99.4)]; 96974985 1xPhospho [S327(99.4)]	0.000313925	0	2	5	2	530414987; 96974985	530414987 [303-346]; 96974985 [303-346]	0	4836.37	S25(Phospho): 99.42	61	36.2	47.2	47.6	38.9	37.5	37.8	37.6	35.3	46.7																61	Not Unique	4.56067	High	0	0.0003356
High	[K].TEDGGWEWSDDEFDEESEEGK.[A]	2xTMT6plex [N-Term; K21]; 1xPhospho [S9(100)]	767924844 1xPhospho [S392(100)]	0.000193246	0	1	5	5	767924844	767924844 [384-404]	0	3014.21	S9(Phospho): 100	1108.1	350.1	750	593.1	336.4	509.8	712	781	354.6	376.6																1108.1	Unique	4.96874	High	0	0.0003297
High	[R].AAVQELSSSILAGEDPEER.[G]	1xTMT6plex [N-Term]; 2xPhospho [S8(100); S9(100)]	767981053 2xPhospho [S366(100); S367(100)]	0.000398924	0	1	2	6	767981053	767981053 [359-377]	0	2390.07	S8(Phospho): 100; S9(Phospho): 100	165.5	141.6	131.3	138.9	138.3	177.8	122.3	153.3	151.2	206.6																165.5	Unique	4.05146	High	0	0.000413
High	[R].LVSPGSANETSSILVESVTR.[S]	1xTMT6plex [N-Term]; 1xPhospho [S/T]	256222411 1xPhospho [S2512(100)]	0.000101351	0	1	5	3	256222411	256222411 [2507-2526]	0	2355.2	S3(Phospho): 100	150.9	170.4	150.9	136.7	124.3	162	154.8	125.1	89.5	173.4																150.9	Unique	5.94924	High	0	6.949e-05
High	[K].APEPLGPADQSELGPEQLEAEVGESSDEEPVESR.[A]	1xTMT6plex [N-Term]; 1xPhospho [S26(99.4)]	47132587 1xPhospho [S166(99.4)]	1.08778e-05	0	1	1	4	47132587	47132587 [141-174]	0	3886.76	S26(Phospho): 99.38	184.9	191.4	106	90.6	82.9	272.7	81.2	332.7	473.9	93.3																184.9	Unique	7.40228	High	0	1.384e-06
High	[R].LQTTDNLLPMSPEEFDEVSR.[I]	1xTMT6plex [N-Term]; 1xOxidation [M10(100)]; 1xPhospho [S11(100)]	1034616158 1xPhospho [S729(100)]	3.7886e-05	0	1	2	3	1034616158	1034616158 [719-738]	0	2646.22	M10(Oxidation): 100; S11(Phospho): 100	414.6	338.6	322.9	287.1	626.3	336.1	230.4	368.5	316.2	422.4	70.12	46.86	66.77	48.87	66.47	69.49	38.99	81.55	67.51	57.3						209	Unique	5.8617	High	0	1.252e-05
High	[R].SLPGESEEMMEEVDQVTLYSYK.[V]	2xTMT6plex [N-Term; K22]; 2xOxidation [M9(100); M10(100)]; 1xPhospho [S6(100)]	70778918 1xPhospho [S60(100)]	0.000410414	0	1	1	5	70778918	70778918 [55-76]	0	3134.42	S6(Phospho): 100; M9(Oxidation): 100; M10(Oxidation): 100	1089.1	364.9	603.8	472	360.6	396.1	445.4	486.2	481.2	784.3	30.08	32.69	72.95	28.7	99.04	66.88	33.08	29.11	66.86	21.31						857.4	Unique	5.45009	High	0	0.0004212
High	[K].AAQQDSDSDGEALGGNPMVAGFQDDVDLEDQPR.[G]	1xTMT6plex [N-Term]; 1xPhospho [S8(100)]	291219927 1xPhospho [S428(100)]	9.18925e-06	0	1	2	6	291219927	291219927 [421-453]	0	3756.62	S8(Phospho): 100	166.5	155.6	174.2	186.2	130	135.9	143.6	158.7	187.5	148.1																166.5	Unique	7.36443	High	0	2.709e-06
High	[K].DSGNWDTSGSELSEGELEK.[R]	2xTMT6plex [N-Term; K19]; 2xPhospho [S10(98.9); S13(100)]	1034615069 2xPhospho [S1018(98.9); S1021(100)]	0.000353368	0	1	12	8	1034615069	1034615069 [1009-1027]	0	2658.13	T7(Phospho): 49.84; S8(Phospho): 49.84; S13(Phospho): 100	734	719.5	490.4	1073	706	640.7	484.3	938.5	688.7	471.6																734	Unique	4.86166	High	0.0002786	0.0005644
High	[K].DSGNWDTSGSELSEGELEK.[R]	2xTMT6plex [N-Term; K19]; 1xPhospho [S13(100)]	1034615069 1xPhospho [S1021(100)]	7.42301e-05	0	1	12	14	1034615069	1034615069 [1009-1027]	0	2578.16	S13(Phospho): 100	800.7	1078.1	507.1	762.5	920	839	293.8	990.4	548.7	408.8	7.42	16.21	9.28	22.54	10.19	1.13	38.66	24.88	24.64	17.12							Unique	5.16335	High	0	4.436e-05
High	[R].GAEAFGDSEEDGEDVFEVEK.[I]	2xTMT6plex [N-Term; K20]; 1xPhospho [S8(100)]	767977796 1xPhospho [S51(100)]	0.00025719	0	1	2	2	767977796	767977796 [44-63]	0	2697.19	S8(Phospho): 100	575.1	226.4	835.6	649.6	239.6	213.5	674.7	376.1	412.2	606																575.1	Unique	5.99239	High	0	0.0002696
High	[K].QVYEEEYGSSLEDDVVGDTSGYYQR.[M]	1xTMT6plex [N-Term]; 1xPhospho [S9(99.5)]	4502107 1xPhospho [S135(99.5)]	0.000342772	0	1	2	2	4502107	4502107 [127-151]	0	3197.37	S9(Phospho): 99.47	338.6	103	171.6	175.1	165.7	650.6	190.4	274.7	464.3	427																338.6	Unique	4.44542	High	0	0.0003654
High	[R].DTEEQNPETVNWEDRPSTPTILGYEVMEER.[A]	1xTMT6plex [N-Term]; 1xPhospho [T18(99.4)]		0.000154904	0	1	3	6	23238246	23238246 [92-121]	0	3873.74	T18(Phospho): 99.42	315.4	226.7	303.1	193	212.4	277.4	334.7	177.3	237.6	205.7																315.4	Unique	5.50159	High	0	0.0001361
High	[R].EDSTLALAVGSESPLATPASPSAAPEPEK.[G]	2xTMT6plex [N-Term; K29]; 1xPhospho [S20(99.6)]	578837461 1xPhospho [S465(99.6)]	7.9894e-05	0	1	1	2	578837461	578837461 [446-474]	0	3360.69	S20(Phospho): 99.56																											No Quan Values	4.15641	High	0	4.639e-05
High	[R].EEEFGVDDSYSEQGAQDSPTHLEMMESELAGK.[Q]	2xTMT6plex [N-Term; K32]; 1xOxidation [M24(99.2)]; 1xPhospho [S/T/Y]		4.86888e-05	0	1	15	8	1034653772	1034653772 [136-167]	0	4099.77	S18(Phospho): 50; T20(Phospho): 50; M24(Oxidation): 98.77	380.7	396.1	324.2	429.6	311.5	201	379.6	237.7	263.8	202.4																380.7	Unique	5.32546	High	0	1.95e-05
High	[R].AYSQEEITQGFEETGDTLYAPYSTHFQLQNQPPQK.[E]	2xTMT6plex [N-Term; K35]; 2xPhospho [S3(100); S/T/Y]	4506403 2xPhospho [S301(100); S/T/Y]	0.000411095	0	1	1	3	4506403	4506403 [299-333]	0	4664.13	S3(Phospho): 100; S23(Phospho): 49.72; T24(Phospho): 49.72	661.2	38.6	76.7	42	37.9	43.4	45.1	52.8	51.1	57.1																661.2	Unique	5.21262	High	0	0.0004217
High	[R].TPGESSAISMGIVSVSSPDVSSVSELTNK.[E]	2xTMT6plex [N-Term; K29]; 1xPhospho [S/T]		0.000281287	0	1	6	6	612339310	612339310 [1472-1500]	0	3403.7	S14(Phospho): 33.29; S16(Phospho): 33.29; S17(Phospho): 33.29	79.5	59.8	56.5	50.7	47.7	52.1	49.1	32.5	49.5	68.6																79.5	Unique	4.02234	High	0	0.0002986
High	[R].EEGPPPPSPDGASSDAEPEPPSGR.[T]	1xTMT6plex [N-Term]; 1xPhospho [S8(100)]	50658065 1xPhospho [S22(100)]	2.07669e-05	0	1	3	36	50658065	50658065 [15-38]	0	2668.16	S8(Phospho): 100	343.6	494.5	603.9	787.4	1204.9	467.7	349.6	568.7	738.8	680.7	32.51	33.42	54.48	22.56	70.14	25.87	55.54	17.49	57.09	28.54							Unique	6.0451	High	0	4.338e-06
High	[K].AEQGSEEEGEGEEEEEEGGESK.[A]	2xTMT6plex [N-Term; K22]; 1xPhospho [S5(100)]	69354671 1xPhospho [S228(100)]	0.000125532	0	1	1	9	69354671	69354671 [224-245]	0	2892.18	S5(Phospho): 100	889.9	1696.4	893.2	5399.7	6530.4	1118.5	1006.7	1680.3	2041.8	1252	60.29	149.09	110.07	170.12	143.68	116.71	71.41	101.21	75.68	54.96							Unique	5.64445	High	0	9.837e-05
High	[R].QGSFSEDVISHK.[G]	2xTMT6plex [N-Term; K12]; 1xPhospho [S3(100)]	530362268 1xPhospho [S4087(100)]	0.000379038	0	1	32	8	530362268	530362268 [4085-4096]	0	1871.93	S3(Phospho): 100	719.6	745.3	510.4	2087	1315.2	1296.7	1733.5	728.7	858	423.2	2.7	0.43	1.9	4.69	13.8	2.67	0.15	21.33	10.67	12.56							Unique	5.02605	High	0	0.0003975
High	[R].RPSQEQSASASSGQPQAPLNR.[E]	1xTMT6plex [N-Term]; 1xPhospho [S3(100)]	150010552 1xPhospho [S956(100)]	5.45663e-06	0	1	4	47	150010552	150010552 [954-974]	0	2505.2	S3(Phospho): 100	5600.3	7615.6	5867.6	12111.4	2965	5981.9	5452.8	6668.8	8268.8	4018.4	0.81	67.92	8.7	57.31	16.32	3.73	56.81	3.56	31.14	0.94							Unique	8.18846	High	0	4.091e-07
High	[R].KQSAGPNSPTGGGGGGGSGGTR.[M]	2xTMT6plex [N-Term; K1]; 1xPhospho [S/T]		4.95386e-05	0	1	9	8	530393316	530393316 [46-67]	1	2382.16	S8(Phospho): 100	1322.2	860.1	650.3	1115.3	1460.2	700.2	599.7	1000.5	915.7	673.4	46.59	45.78	102.34	92.61	87.94	91.56	85.68	103.84	83.66	80.84							Unique	4.90852	High	0	2.009e-05
High	[K].AIPVAQDLNAPSDWDSR.[G]	1xTMT6plex [N-Term]; 1xPhospho [S16(97.4)]	4759166 1xPhospho [S205(100)]; 91206462 1xPhospho [S219(100)]; 91598939 1xPhospho [S192(100)]	0.000118937	0	3	5	30	4759166; 91206462; 91598939	4759166 [190-206]; 91206462 [204-220]; 91598939 [177-193]	0	2164.03	S16(Phospho): 100	740	786.3	468.4	1218	579.7	526.9	244	528.9	555.1	740.4	58.08	45	45.32	16.35	52.31	14.31	45.8	14.74	12.25	64.75							Not Unique	4.9509	High	0	9.04e-05
High	[R].LEVSVDGLTLSPDPEERPGAEGAPLLPPPLPPPSPPGSGR.[G]	1xTMT6plex [N-Term]; 1xPhospho [S34(99.4)]	15826852 1xPhospho [S43(99.4)]	2.50496e-06	0	1	1	1	15826852	15826852 [10-49]	0	4304.21	S34(Phospho): 99.45	90.8	99.4	169.3	99.3	67.4	99.6	132	74.7	72.6	115.2																90.8	Unique	7.57596	High	0	1.037e-07
High	[K].EALNIIGDISTSTVSTPVPPPVDDTWLQSASSHSPTPQR.[R]	1xTMT6plex [N-Term]; 1xPhospho [T/S]	56549121 1xPhospho [S764(99.5)]	1.94623e-05	0	1	5	7	56549121	56549121 [731-769]	0	4410.17	S34(Phospho): 99.47																											No Quan Values	6.03408	High	0	3.855e-06
High	[R].AALIPGGLSDGQFYSPPESEAGSEEAEEKQDSEKPLLEL.[-]	3xTMT6plex [N-Term; K29; K34]; 1xPhospho [S23(100)]		0.000311014	0	1	2	6	767945932	767945932 [196-234]	1	4885.42	S23(Phospho): 100	228.9	117.7	178.4	231.4	142.3	223.1	206.4	303.5	217.1	193.4																228.9	Unique	5.18311	High	0	0.0003327
High	[K].SQETGDLDVGGLQETDKIIEVEEEQEDPYLNDR.[C]	2xTMT6plex [N-Term; K17]; 1xPhospho [S1(100)]	34734066 1xPhospho [S147(100)]	1.12852e-05	0	1	4	2	34734066	34734066 [147-179]	1	4302.02	S1(Phospho): 100																											No Quan Values	6.55528	High	0	1.475e-06
High	[R].EQSEEQITDVHMVSDSDGDDFEDATEFGVDDGEVFGMASSALR.[K]	1xTMT6plex [N-Term]; 1xOxidation [M37(100)]; 1xPhospho [S/T]		2.20156e-05	0	1	2	3	5901948	5901948 [276-318]	0	4992.07	S14(Phospho): 33.33; S16(Phospho): 33.33; T25(Phospho): 33.33; M37(Oxidation): 100	73.3	36.9	60.2	64.5	49.4	39.1	45.8	47.7	62	59																73.3	Unique	4.92675	High	0	4.792e-06
High	[K].TSDDGGDSPEHDTDIPEVDLFQLQVNTLR.[R]	1xTMT6plex [N-Term]; 1xPhospho [S8(100)]	13375862 1xPhospho [S99(100)]	0.000149706	0	1	1	2	13375862	13375862 [92-120]	0	3522.61	S8(Phospho): 100	90.3	94.6	122.2	92.5	43.7	116.3	55.1	78	107.7	55.9																90.3	Unique	5.35306	High	0	0.0001294
High	[K].TDPASLETGQDSEDDSGEPEDWVPDPVDADPGK.[S]	2xTMT6plex [N-Term; K33]; 1xPhospho [S/T]		0.000112195	0	1	1	4	7019327	7019327 [459-491]	0	4008.74	S12(Phospho): 99.56	121.1	78.4	90.3	130.2	83.1	98.4	107.5	143.6	92.1	106.5																121.1	Unique	4.35833	High	0	8.214e-05
High	[R].ANFDEENAYFEDEEEDSSNVDLPYIPAENSPTR.[Q]	1xTMT6plex [N-Term]; 1xPhospho [S30(99.6)]	1034597977 1xPhospho [S96(100)]	4.1131e-05	0	1	1	3	1034597977	1034597977 [67-99]	0	4115.74	S30(Phospho): 99.56	245.5	149.7	277.6	169.3	135.5	95.6	170.4	222.5	159.3	137.2																245.5	Unique	6.07333	High	0	1.449e-05
High	[R].SLDPLGSEEEAEASEDDSLHLLGGGGR.[D]	1xTMT6plex [N-Term]; 2xPhospho [S7(100); S18(100)]	48762926 2xPhospho [S891(100); S902(100)]	5.33184e-05	0	1	2	1	48762926	48762926 [885-911]	0	3129.35	S7(Phospho): 100; S18(Phospho): 100	88.9	267.2	119.3	158.4	92.8	133.4	107.2	143.3	121.1	88.8																88.9	Unique	6.22075	High	0	2.289e-05
High	[K].LSGEGDTDLGALSNDGSDDGPSVMDETSNDAFDSLER.[K]	1xTMT6plex [N-Term]; 1xOxidation [M24(100)]; 1xPhospho [S22(98.3)]	767983685 1xPhospho [S614(98.3)]	5.67695e-05	0	1	1	8	767983685	767983685 [593-629]	0	4113.71	S22(Phospho): 98.28; M24(Oxidation): 100																											No Quan Values	4.59308	High	0	2.556e-05
High	[K].TTSGYAGGLSSAYGGLTSPGLSYSLGSSFGSGAGSSSFSR.[T]	1xTMT6plex [N-Term]; 1xPhospho [T/S/Y]		2.96778e-08	0	1	2	10	372466572	372466572 [443-482]	0	4034.85	T17(Phospho): 50; S18(Phospho): 50	86.1	39.3	53.1	35.3	43.4	69.2	37.1	50.7	43.8	62.4																86.1	Unique	9.72008	High	0	4.141e-11
High	[K].TQSYPTDWSDDESNNPFSSTDANGDSNPFDDDATSGTEVR.[V]	1xTMT6plex [N-Term]; 1xPhospho [S/T/Y]	768023240 1xPhospho [S401(96.6)]	0.000158573	0	1	6	57	768023240	768023240 [393-432]	0	4650.87	S13(Phospho): 24.91; S18(Phospho): 24.91; S19(Phospho): 24.91; T20(Phospho): 24.91	466.3	285.8	454.3	360.8	206.9	264.6	353.3	288	320.6	312.6																466.3	Unique	5.16019	High	0	0.0001726
High	[R].TDCEPVGLEPAVEQSSAASELAEASSEELAEAPTEAPSPEAR.[D]	1xTMT6plex [N-Term]; 1xCarbamidomethyl [C3]; 1xPhospho [S38(100)]	321267469 1xPhospho [S344(100)]	9.03163e-06	0	1	10	4	321267469	321267469 [307-348]	0	4621.09	S38(Phospho): 100	183.5	115.1	127.8	156.2	130.8	145.5	116.5	161.2	118.8	138.9																183.5	Unique	7.53969	High	0	9.959e-07
High	[R].SDDGLSAASSPEPGTSELAGEGLK.[A]	2xTMT6plex [N-Term; K24]; 2xPhospho [S9(100); S10(100)]	21040334 2xPhospho [S496(100); S497(100)]	0.00035274	0	1	4	3	21040334	21040334 [488-511]	0	2893.32	S9(Phospho): 99.99; S10(Phospho): 99.99	203.4	122.7	177	263.2	98.8	192.7	164.9	130.8	145.8	161.1																203.4	Unique	4.05091	High	0	0.0003749
High	[K].EPSAAAPTGAGGVAPGSGNNSGGPSLLVPLPVNPPSSPTPSFSDAK.[A]	2xTMT6plex [N-Term; K46]; 1xPhospho [S37(99.3)]	530433526 1xPhospho [S508(99.3)]	8.61762e-05	0	1	6	1	530433526	530433526 [472-517]	0	4749.38	S37(Phospho): 99.28	48.7	23.8	70.2	26.3	15.7	31.6	35.6	31	30.9	55.4																48.7	Unique	5.64537	High	0	5.299e-05
High	[K].YGPADVEDTTGSGATDSKDDDDIDLFGSDDEEESEEAK.[R]	3xTMT6plex [N-Term; K18; K38]; 1xPhospho [T9(99.6)]	4503477 1xPhospho [S106(100)]	6.54366e-06	0	1	1	10	4503477	4503477 [79-116]	1	4792.08	S28(Phospho): 100	778.4	276.9	385.3	485.4	396.6	524.6	483	388.5	528.7	682.2																778.4	Unique	6.84347	High	0	5.651e-07
High	[K].IVEPEVVGESDSEVEGDAWR.[M]	1xTMT6plex [N-Term]; 2xPhospho [S10(100); S12(100)]	50726968 2xPhospho [S116(100); S118(100)]	0.000366719	0	1	1	3	50726968	50726968 [107-126]	0	2591.12	S10(Phospho): 100; S12(Phospho): 100	35	11.4	39.5	19.1	24.7	8.7	17.8		15	17.1																35	Unique	4.30794	High	0	0.000387
High	[K].IVEPEVVGESDSEVEGDAWR.[M]	1xTMT6plex [N-Term]; 1xPhospho [S12(100)]		0.00022909	0	1	1	5	50726968	50726968 [107-126]	0	2511.15	S12(Phospho): 100	519.8	225	483.8	368.8	304.5	265	341.7	255.9	346.3	324.9																519.8	Unique	4.79283	High	0	0.0002342
High	[R].RGSGDTSSLIDPDTSLSELR.[DE]	1xTMT6plex [N-Term]; 1xPhospho [S3(100)]	767924544 1xPhospho [S328(100)]	7.24851e-05	0	1	38	8	767924544	767924544 [326-345]	1	2415.16	S3(Phospho): 100	148.7	249.1	223.2	297.5	285.9	246.8	359.4	271.1	269.8	298.3	22.31	8.88	47.23	31.31	34.88	7.56	10.57	19.6	12.43	33.52							Unique	6.51933	High	0	3.928e-05
High	[K].SFSEDAVTDSSGSGTLPR.[A]	1xTMT6plex [N-Term]; 2xPhospho [S10(100); S11(99.6)]	530404494 2xPhospho [S1233(98.7); S1234(98.7)]	0.000415189	0	1	4	35	530404494	530404494 [1224-1241]	0	2201.92	S10(Phospho): 99.58; S13(Phospho): 100	385.9	333	385.8	525.3	311	511.9	412.1	342.7	483.3	605.7																385.9	Unique	4.40205	High	9.533e-05	0.0004456
High	[R].EDMAALEKDYEEVGADSADGEDEGEEY.[-]	2xTMT6plex [N-Term; K8]; 1xPhospho [S17(100)]	733605926 1xPhospho [S509(100)]	0.000245254	0	1	3	6	733605926	733605926 [493-519]	1	3504.44	S17(Phospho): 100	740.1	305.1	674.8	474.8	373.1	228	524.4	258.3	217.4	340.4																740.1	Unique	4.83203	High	0	0.0002549
High	[K].FASGNTVDGYSSSDSFTSDPEQIGSNVTR.[Q]	1xTMT6plex [N-Term]; 1xPhospho [S/T/Y]		0.000183429	0	1	3	7	190886435	190886435 [503-531]	0	3334.46	S11(Phospho): 16.65; S12(Phospho): 16.65; S13(Phospho): 16.65; S15(Phospho): 16.65; T17(Phospho): 16.65; S18(Phospho): 16.65	42.6	23.8	56	48.5	30.7	28.2	30.6	39.2	44.6	36.8																42.6	Unique	3.93593	High	0	0.0001736
High	[R].GPDEAMEDGEEGSDDEAEWVVTK.[D]	2xTMT6plex [N-Term; K23]; 1xOxidation [M6(100)]; 1xPhospho [S13(100)]	21361462 1xPhospho [S438(100)]	0.000189661	0	1	1	30	21361462	21361462 [426-448]	0	3049.29	M6(Oxidation): 100; S13(Phospho): 100	2681	4432.1	1725.1	3256.8	1983.3	3293.4	2614.9	5624.2	2959	2505.8																2681	Unique	5.39298	High	0	0.0002443
High	[R].GPDEAMEDGEEGSDDEAEWVVTK.[D]	2xTMT6plex [N-Term; K23]; 1xPhospho [S13(100)]	21361462 1xPhospho [S438(100)]	0.000147799	0	1	1	9	21361462	21361462 [426-448]	0	3033.3	S13(Phospho): 100	1294.9	1045.8	1070.2	1403.3	943.8	1959.6	1382.2	2827	1556.7	1221.8																1294.9	Unique	5.82706	High	0	0.0002623
High	[K].YDIPATAATATSPTPNPVPSVPANPPK.[S]	2xTMT6plex [N-Term; K27]; 1xPhospho [T/S/Y]	768039909 1xPhospho [S411(98.9)]	3.64395e-05	0	1	7	19	768039909	768039909 [400-426]	0	3212.66	T11(Phospho): 49.88; S12(Phospho): 49.88	507.9	149	331	220.5	165.7	278.6	265.1	229.8	193.8	330.3																507.9	Unique	5.38362	High	0	1.98e-05
High	[K].SSSSQPVTPVSPVWSPGVAPTQPPAFPTSNPSK.[G]	2xTMT6plex [N-Term; K33]; 1xPhospho [T/S]	193083183 1xPhospho [S777(99.4)]	0.000188479	0	1	4	2	193083183	193083183 [767-799]	0	3856.96	S11(Phospho): 99.41	1342	440.3	1031.3	528.5	580.4	1192.5	549.9	859	1071.9	666.4																	Unique	4.43839	High	0	0.0001806
High	[R].DAPAEGSGEGLNSPSTLECSPGSQPPSPGPATSPASPDLDPEAVR.[G]	1xTMT6plex [N-Term]; 1xCarbamidomethyl [C19]; 1xPhospho [S27(99.1)]	767906852 1xPhospho [S1492(99.1)]	3.86053e-06	0	1	7	1	767906852	767906852 [1466-1510]	0	4695.12	S27(Phospho): 99.08																											No Quan Values	6.13504	High	0	2.223e-07
High	[R].VAESAAAAPQGGPELPPSPASPPEQPPAPEER.[E]	1xTMT6plex [N-Term]; 2xPhospho [S18(100); S21(100)]	195963316 2xPhospho [S116(100); S119(100)]	1.39192e-05	0	1	6	14	195963316	195963316 [99-130]	0	3520.62	S18(Phospho): 100; S21(Phospho): 100	205.7	145.1	154.8	161.3	180.4	187.1	151.3	211.9	181.1	176.2																205.7	Unique	6.78717	High	0	2.135e-06
High	[K].SLQDDTEPENGSDISSAENEQTEADQATAAETLSK.[N]	2xTMT6plex [N-Term; K35]; 1xPhospho [S/T]		0.000112681	0	1	4	17	51479145	51479145 [275-309]	0	4219.89	S15(Phospho): 49.88; S16(Phospho): 49.88	178.8	161.6	215.6	195.4	118.5	251.6	168.9	158.1	201	191.4																178.8	Unique	5.13677	High	0	8.287e-05
High	[R].STPESDVGAGGEEEAGSPPFSPPAGGGVPEGTGAGGLAAGGTGGGPDR.[L]	1xTMT6plex [N-Term]; 1xPhospho [T/S]	5174607 1xPhospho [T190(99.2)]	1.64305e-06	0	1	2	4	5174607	5174607 [189-236]	0	4487.01	S1(Phospho): 50; T2(Phospho): 50	97	90.1	119	104.6	83.9	147.1	82.4	127.5	121.9	263.6																97	Unique	7.90067	High	0	5.356e-08
High	[K].IEEAPEATPQPSQPGPSSPISLSAEEENAEGEVSR.[A]	1xTMT6plex [N-Term]; 1xPhospho [S12(98.7)]	190358532 1xPhospho [T24(98.7)]	4.41448e-06	0	1	2	7	190358532	190358532 [17-51]	0	3928.82	T8(Phospho): 98.66	85.1	64.4	89.5	53.6	77.1	93.1	66.6	60.7	133.1	63																85.1	Unique	7.31831	High	0	3.736e-07
High	[R].DENPFASLTATSQPIAAAARSPDR.[N]	1xTMT6plex [N-Term]; 1xPhospho [S21(100)]	530360483 1xPhospho [S238(100)]	4.3416e-05	0	1	8	1	530360483	530360483 [218-241]	1	2795.36	S21(Phospho): 100	118.2	121.1	205.7	144.9	87.3	119.8	140.6	122	129.4	206.3																118.2	Unique	6.10849	High	0	1.59e-05
High	[R].ELDDDERDVDASPTAGLQEAATLAPTR.[R]	1xTMT6plex [N-Term]; 1xPhospho [S12(100)]	257196142 1xPhospho [S165(100)]	1.33011e-05	0	1	1	3	257196142	257196142 [154-180]	1	3165.48	S12(Phospho): 100	319.2	284.1	437.8	267.3	183.4	434	243.5	279.2	241.2	519.7																319.2	Unique	7.48195	High	0	1.976e-06
High	[K].AENAEGQTPAIGPDGEPLDETSQMSDLPVK.[V]	2xTMT6plex [N-Term; K30]; 1xOxidation [M24(100)]; 1xPhospho [S25(100)]	768003541 1xPhospho [S613(100)]	0.000199764	0	1	11	2	768003541	768003541 [589-618]	0	3650.72	M24(Oxidation): 100; S25(Phospho): 99.98																											No Quan Values	4.10291	High	0	0.0001955
High	[R].RSDVQEESEGSDTDDNKDSAAFEDNEVQDEFLEK.[L]	3xTMT6plex [N-Term; K17; K34]; 2xPhospho [S/T]		8.69249e-05	0	1	1	23	14670392	14670392 [698-731]	2	4725.05	S8(Phospho): 100; S11(Phospho): 100	658.3	561.5	552	794.5	472.2	615.5	497.8	538.4	697	562.7																658.3	Unique	6.08424	High	0	5.376e-05
High	[K].VNVTVDYIRPASPATETVPAFSER.[T]	1xTMT6plex [N-Term]; 1xPhospho [S12(100)]	77404397 1xPhospho [S426(100)]	0.000190057	0	1	2	1	77404397	77404397 [415-438]	0	2928.47	S12(Phospho): 100	219.9	227.1	190.6	189.1	213.4	202.3	188.9	153.3	175.9	162.7																219.9	Unique	5.5593	High	0	0.0001823
High	[R].TPNNVVSTPAPSPDASQLASSLSSQK.[E]	2xTMT6plex [N-Term; K26]; 1xPhospho [S12(98.9)]	807045912 1xPhospho [S908(98.9)]	0.00018038	0	1	28	1	807045912	807045912 [897-922]	0	3121.58	S12(Phospho): 98.92	201.9	160.2	201.4	147.1	102.8	113.2	246.8	103.2	147.6	168.9																201.9	Unique	5.86652	High	0	0.0001697
High	[K].AASPVLQEDIDIEGVQSEGQDNGAEDSGDTEDELRR.[V]	1xTMT6plex [N-Term]; 1xPhospho [S/T]	190684675 1xPhospho [S485(100)]	0.000236114	0	1	1	8	190684675	190684675 [459-494]	1	4153.85	S27(Phospho): 100	197.7	173.7	187.8	204.1	150.2	198.9	132.3	262.8	286.6	193.4																197.7	Unique	4.52681	High	0	0.0002432
High	[R].LLQQQEEEEACLEEEEEEEDSDEEDQR.[S]	1xTMT6plex [N-Term]; 1xCarbamidomethyl [C11]; 1xPhospho [S21(100)]	16418351 1xPhospho [S257(100)]	3.09165e-05	0	1	3	2	16418351	16418351 [237-263]	0	3676.47	S21(Phospho): 100	117.3	60.8	139.8	205.3	222.1	93.7	214	100.5	97.5	75																117.3	Unique	5.91563	High	0	8.735e-06
High	[K].MESEGGADDSAEEGDLLDDDDNEDRGDDQLELIKDDEK.[E]	3xTMT6plex [N-Term; K34; K38]; 1xPhospho [S10(100)]	767980426 1xPhospho [S260(100)]	1.32925e-06	0	1	2	6	767980426	767980426 [251-288]	2	4965.17	S10(Phospho): 100	1547.9	109.2	1489.3	640.7	285	626.4	998.7	724.8	710.8	1251.9																1547.9	Unique	7.55704	High	0	3.392e-08
High	[K].MESEGGADDSAEEGDLLDDDDNEDRGDDQLELIKDDEK.[E]	3xTMT6plex [N-Term; K34; K38]; 1xOxidation [M1(100)]; 1xPhospho [S10(100)]		2.52838e-05	0	1	2	8	767980426	767980426 [251-288]	2	4981.17	M1(Oxidation): 100; S10(Phospho): 100	675.8	123.7	475.3	322.9	182.2	300.6	356.3	321.1	307.1	389.6																675.8	Unique	5.97478	High	0	6.133e-06
High	[K].EGMNPSYDEYADSDEDQHDAYLER.[M]	1xTMT6plex [N-Term]; 1xPhospho [S13(100)]	1034575062 1xPhospho [S578(100)]	6.68672e-06	0	1	2	5	1034575062	1034575062 [566-589]	0	3158.24	S13(Phospho): 100	134	50	101.7	146.3	69	85.6	179.3	121.5	177.9	147.1	61.83	38.57	35.65	37.53	46.69	45.37	44.85	53.93	17.95	25.95							Unique	7.10834	High	0	7.84e-07
High	[K].SGTAETEPVEQDSSQPSLPLVR.[A]	1xTMT6plex [N-Term]; 1xPhospho [S/T]		0.000325748	0	1	5	18	213972636	213972636 [823-844]	0	2636.27	S14(Phospho): 99.52	1574.3	913.7	896.4	932	1399.9	1358.7	560	1484.9	1450.7	972	38.7	2.42	13.39	3.52	3.99	5.33	22.53	17.73	9.8	0.29							Unique	3.87277	High	0	0.0003568
High	[R].SPGKAEAESDALPDDTVIESEALPSDIAAEAR.[A]	2xTMT6plex [N-Term; K4]; 1xPhospho [S1(100)]	9966805 1xPhospho [S287(100)]	2.51202e-05	0	1	1	2	9966805	9966805 [287-318]	1	3792.85	S1(Phospho): 100	145.7	185.4	173	171	119.8	310.3	151.3	203.4	155.6	181																145.7	Unique	6.18281	High	0	6.057e-06
High	[K].GEDSAEETEAKPAVVAPAPVVEAVSTPSAAFPSDATAENVK.[Q]	3xTMT6plex [N-Term; K11; K41]; 1xPhospho [S4(100)]	212549553 1xPhospho [S482(100)]	2.51582e-06	0	1	6	12	212549553	212549553 [479-519]	0	4806.42	S4(Phospho): 100	1194.3	340.4	5826.3	724.6	325.7	747.4	410.3	703.3	589.3	369.9	133.86	115.77	140.75	130.39	113.25	129.09	121.47	129.4	129.41	120.47						63.8	Unique	7.10915	High	0	1.043e-07
High	[K].VTDALPEPEPPGAMAASEDEEEEEEALEAMQSR.[L]	1xTMT6plex [N-Term]; 1xOxidation [M]; 1xPhospho [S17(100)]	7706353 1xPhospho [S200(100)]	0.000107214	0	1	4	3	7706353	7706353 [184-216]	0	3882.67	M14(Oxidation): 100; S17(Phospho): 100	175	107.5	162.8	144.9	120.3	138.7	141.8	132.3	156.2	160.5																175	Unique	5.09177	High	0	7.64e-05
High	[K].EAEEGPTGASESQDSPR.[K]	1xTMT6plex [N-Term]; 1xPhospho [S/T]	578820034 1xPhospho [S578(100)]	5.21777e-05	0	1	12	24	578820034	578820034 [564-580]	0	2055.87	S15(Phospho): 100	1336.1	3001.4	1335.2	2797.1	1392.8	1526.5	1391.1	2022.2	1631.9	1380.1	11.62	9.35	10.17	4.41	14.51	14.23	16.63	3.23	5.66	1.84							Unique	5.78089	High	0	2.201e-05
High	[R].LGIAVIHGEAQDAESDLVDGRHSPPMVR.[S]	1xTMT6plex [N-Term]; 1xOxidation [M26(100)]; 1xPhospho [S]		0.000204773	0	1	6	8	1034600502	1034600502 [259-286]	1	3294.61	S23(Phospho): 99.01; M26(Oxidation): 100	89.4	63.2	96.9	82.6	64.9	72.3	86.2	73.8	90.8	102																89.4	Unique	5.14748	High	0	0.0002023
High	[R].LGIAVIHGEAQDAESDLVDGRHSPPMVR.[S]	1xTMT6plex [N-Term]; 1xPhospho [S23(100)]		0.000255171	0	1	6	4	1034600502	1034600502 [259-286]	1	3278.62	S23(Phospho): 100	61.5	37.9	80.4	48.1	65.1	77.6	57.1	71.9	68.2	73.1																61.5	Unique	4.71257	High	0	0.0002672
High	[R].DSALQDTDDSDDDPVLIPGAR.[Y]	1xTMT6plex [N-Term]; 1xPhospho [S10(99.5)]	312176366 1xPhospho [S734(99.5)]	0.000179625	0	1	10	3	312176366	312176366 [725-745]	0	2524.13	S10(Phospho): 100	62.4	70.1	57.4	85	51.9	47.2	70.2	81	60.2	69.1																62.4	Unique	4.49187	High	0	0.0001686
High	[R].EMLMEDVGSEEEQEEEDEAPFQEK.[D]	2xTMT6plex [N-Term; K24]; 1xPhospho [S9(100)]	56118310 1xPhospho [S113(100)]	0.000191247	0	1	1	2	56118310	56118310 [105-128]	0	3395.45	S9(Phospho): 100	138.6	63.9	186.1	118.6	70.6	90.6	136.8	94.7	74.2	99.8																138.6	Unique	5.11951	High	0	0.0001842
High	[R].QASPETSASPDGSQNLVYETELLR.[T]	1xTMT6plex [N-Term]; 1xPhospho [S3(100)]	374532817 1xPhospho [S3015(100)]	0.000206466	0	1	15	5	374532817	374532817 [3013-3036]	0	2901.37	S3(Phospho): 100	718.2	457	717.5	405.3	659.7	144.4	344.2	276.5	295	509.3		23.15	32.27	22.29	6.34	13.4	46.63	53.54	36.44	26.8							Unique	5.04786	High	0	0.0003206
High	[R].IQQFDDDEEEEDEEEAQGSGESDGEDGAWQGSQLAR.[G]	1xTMT6plex [N-Term]; 1xPhospho [S19(99.5)]	151101459 1xPhospho [S635(99.5)]	2.48876e-06	0	1	1	3	151101459	151101459 [617-652]	0	4294.72	S19(Phospho): 99.47	41.1	51.2	26.1	64.2	28.2	56.8	51.4	74.7	93.9	35.1																41.1	Unique	6.81406	High	0	1.303e-07
High	[K].EASSPPPHPQLHSEEEIEPMEGPAPPVLIQLSPPNTDADTR.[E]	1xTMT6plex [N-Term]; 1xOxidation [M20(100)]; 3xPhospho [S3(99.8); S4(99.8); S32(100)]	259906018 3xPhospho [S424(99.8); S425(99.8); S453(100)]	0.000244766	0	1	3	2	259906018	259906018 [422-462]	0	4895.18	S3(Phospho): 99.85; S4(Phospho): 99.85; M20(Oxidation): 100; S32(Phospho): 100	81.3	29.8	59.7	48.1	31.2	60.2	46.9	44.9	57.3	57.3																81.3	Unique	5.8067	High	0	0.0002541
High	[R].STAPSAAASASASAAASSPAGGGAEALELLEHCGVCR.[E]	1xTMT6plex [N-Term]; 2xCarbamidomethyl [C33; C36]; 1xPhospho [S/T]		6.08374e-05	0	1	1	4	5032179	5032179 [33-69]	0	3751.73	S13(Phospho): 33.14; S17(Phospho): 33.14; S18(Phospho): 33.14																											No Quan Values	5.6541	High	0	2.886e-05
High	[R].TLEEVVMAEEEDEGTDRPGSPA.[-]	1xTMT6plex [N-Term]; 1xPhospho [S20(100)]	118918405 1xPhospho [S356(100)]	0.00032935	0	1	1	1	118918405	118918405 [337-358]	0	2670.17	S20(Phospho): 100	106.9	75.6	101.1	80.9	84.9	122.2	90.9	111.4	133.1	121.1																106.9	Unique	4.66743	High	0	0.0003521
High	[K].GLNPDGTPALSTLGGFSPASKPSSPR.[E]	2xTMT6plex [N-Term; K21]; 2xPhospho [S17(100); S24(99.2)]	9945320 2xPhospho [S338(97.8); S/T]	1.75054e-05	0	1	7	14	9945320	9945320 [319-344]	0	3129.54	S17(Phospho): 100; S24(Phospho): 99.49	6328.4	1077.6	8627.2	5199.1	1576.4	5266.5	6974.1	5118.5	4471.2	9034.3	30.97	34.21	36.1	20.11	16.42	35.09	32.86	20.1	20.64	29.88							Unique	8.52937	High	0	3.208e-06
High	[R].SDVQEESEGSDTDDNKDSAAFEDNEVQDEFLEK.[L]	3xTMT6plex [N-Term; K16; K33]; 2xPhospho [S7(100); S10(98.3)]	14670392 2xPhospho [S705(100); S708(100)]	0.000259222	0	1	1	14	14670392	14670392 [699-731]	1	4568.95	S7(Phospho): 100; S10(Phospho): 99.99	1023.4	805.1	757.1	1253.9	514.6	792.7	787.7	719.3	730	824.7																1023.4	Unique	6.54918	High	0	0.0002722
High	[R].SDVQEESEGSDTDDNKDSAAFEDNEVQDEFLEK.[L]	3xTMT6plex [N-Term; K16; K33]; 1xPhospho [S10(99)]	14670392 1xPhospho [S708(98.8)]	0.000202673	0	1	1	7	14670392	14670392 [699-731]	1	4488.98	S10(Phospho): 99	302.2	227.1	113.6	160.4	124.5	104.9	133.8	124.4	111	92.2																302.2	Unique	4.68694	High	0	0.0001993
High	[R].VSGEPQQSGDGSLSPQAEAIEVAAGESAGR.[S]	1xTMT6plex [N-Term]; 1xPhospho [S2(100)]	1034627393 1xPhospho [S293(100)]	0.000230946	0	1	3	2	1034627393	1034627393 [292-321]	0	3193.48	S2(Phospho): 100	117.3	60.3	108.2	101.2	162.2	111.4	82.2	93.2	127.1	133.8																117.3	Unique	5.28675	High	0	0.0002366
High	[R].SGEDESQEDVLMDEAPSNLSQASTLQANR.[E]	1xTMT6plex [N-Term]; 1xPhospho [S1(98.3)]	1034673276 1xPhospho [S2504(100)]	0.000435219	0	1	10	1	1034673276	1034673276 [2499-2527]	0	3430.52	S6(Phospho): 100	47.8	17.4	35.2	22.5	11.2	32	29.3	25.8	39.7	33.4																47.8	Unique	4.52267	High	0	0.0004365
High	[R].YYEDLDEVSSTSSVSQSLESEDAR.[T]	1xTMT6plex [N-Term]; 1xPhospho [S/T/Y]		0.000404988	0	1	9	6	530427218	530427218 [1019-1042]	0	3005.3	S9(Phospho): 19.98; S10(Phospho): 19.98; T11(Phospho): 19.98; S12(Phospho): 19.98; S13(Phospho): 19.98	46.3	28.4	33.5	45.4	33.7	36.6	35.1	48.6	53.7	55.1																46.3	Unique	3.23239	High	0	0.0004173
High	[K].FEEESKEPVADEEEEDSDDDVEPITEFR.[F]	2xTMT6plex [N-Term; K6]; 1xPhospho [S17(100)]	4502891 1xPhospho [S102(100)]	2.55419e-06	0	1	2	26	4502891	4502891 [86-113]	1	3852.68	S17(Phospho): 100	4019.9	5686.9	6041.3	7155.1	4143	6018.4	3889.6	8907.4	4567.3	6379.3																4019.9	Unique	7.92372	High	0	5.386e-07
High	[K].LSSSDRYSDASDDSFSEPR.[I]	1xTMT6plex [N-Term]; 1xPhospho [S8(100)]	768032583 1xPhospho [S610(100)]	0.000288937	0	1	2	25	768032583	768032583 [603-621]	1	2430.03	S8(Phospho): 100	844.3	894.8	1766.2	1503.5	1581.3	1235.5	763.6	1257.4	2069.2	1279.6	38.14	4.04	5.82	9.76	7.92	16.96	18.18	4.93	15.24	5.53							Unique	4.49128	High	0	0.0003079
High	[K].GLAEVQQDGEAEEGATSDGEK.[K]	2xTMT6plex [N-Term; K21]; 1xPhospho [S17(99.6)]	1034652357 1xPhospho [S598(99.6)]	0.000255674	0	1	4	5	1034652357	1034652357 [582-602]	0	2658.22	S17(Phospho): 99.61	310.7	263.6	252.3	287.4	1049.2	358	272.1	258	327.9	266.5																310.7	Unique	4.32164	High	0	0.0002675
High	[R].GPSAGGGPGSGTSPQVEWTAR.[R]	1xTMT6plex [N-Term]; 1xPhospho [S13(99.5)]	768011134 1xPhospho [S85(99.5)]	0.000355889	0	1	5	4	768011134	768011134 [73-93]	0	2265.05	S13(Phospho): 99.47	200.5	297.2	271.9	171.2	403.5	267.1	221.2	199.4	288.7	357.2																200.5	Unique	5.05087	High	0	0.0003774
High	[R].RGSDPASGEVEASQLR.[R]	1xTMT6plex [N-Term]; 1xPhospho [S3(100)]	548923663 1xPhospho [S153(100)]	0.000288937	0	1	4	11	548923663	548923663 [151-166]	1	1967.94	S3(Phospho): 100		934.7	594	1413.3	523	2675.5	2206.8		567.5	1208.6		21.16	49.7	54.44		50.44	36.61										Unique	4.89577	High	0	0.000399
High	[K].ASESSSSEESSDDDDEEDQKK.[Q]	3xTMT6plex [N-Term; K20; K21]; 1xPhospho [S2(99.5)]	530394600 1xPhospho [S125(99.5)]	0.000246722	0	1	4	12	530394600	530394600 [124-144]	1	3071.33	S2(Phospho): 99.48	94.6	1058	213.9	312.3	2561	249.1	358.8	386.7	518	121.4																94.6	Unique	6.09318	High	0	0.0004169
High	[R].KANDESNEHSDVIDSQELSK.[V]	3xTMT6plex [N-Term; K1; K20]; 1xPhospho [S6(100)]	4759166 1xPhospho [S240(100)]; 91206462 1xPhospho [S254(100)]; 91598939 1xPhospho [S227(100)]	0.000234224	0	3	5	4	4759166; 91206462; 91598939	4759166 [235-254]; 91206462 [249-268]; 91598939 [222-241]	1	3012.48	S6(Phospho): 100	363.2	225.4	97.9	282.2	234.5	106.6	78.4	99.8	91.1	166.8	46.71	48.24	36.06	57.19	45.11	37.74	15.76	4.07	9.86	35.44							Not Unique	5.43722	High	9.533e-05	0.0004743
High	[R].KASPEPPDSAEGALK.[L]	3xTMT6plex [N-Term; K1; K15]; 1xPhospho [S3(100)]	33457336 1xPhospho [S547(100)]	0.000165098	0	1	1	3	33457336	33457336 [545-559]	1	2264.21	S3(Phospho): 100	161.8	451	265.6	423.7	613.2	375.7	516.1	463.7	567.9	270.1	36.88	10.64	12.91	15.88	17.09	10.04	2.28	0.81	13.73	20.21							Unique	6.02152	High	0	0.0001497
High	[K].ESSTSEGADQKMSSPEDDSDTK.[R]	3xTMT6plex [N-Term; K11; K22]; 1xOxidation [M12(100)]; 1xPhospho [S13(99.6)]	321267469 1xPhospho [S383(99.6)]	0.000107214	0	1	8	4	321267469	321267469 [371-392]	1	3114.39	M12(Oxidation): 100; S13(Phospho): 99.55	583.6	667.3	257.7	359.3	225.6	406.4	167.4	315.7	380.8	228.2																583.6	Unique	5.19643	High	0	7.635e-05
High	[R].SQGDEAGGHGEDRPEPLSPK.[E]	2xTMT6plex [N-Term; K20]; 1xPhospho [S18(100)]	33286446 1xPhospho [S378(100)]	0.000418614	0	1	1	3	33286446	33286446 [361-380]	0	2601.23	S18(Phospho): 100	391.6	374.9	541.5	658.6	245.8	751.8	398.4	750.3	434	537.4																391.6	Unique	4.34991	High	0	0.0004264
High	[R].DGTAPPPQSPGSPGTGQDEEWSDEESPR.[K]	1xTMT6plex [N-Term]; 1xPhospho [S22(100)]	296923763 1xPhospho [S354(100)]	7.97214e-05	0	1	1	2	296923763	296923763 [333-360]	0	3219.36	S22(Phospho): 100	38.5	74.4	25.9	62.7	49.3	34.5	51	33.1	50.2	51.1	14.57	2.67	1.11	25.98	16.21	14.98	23.12	19.13	1.97	4.14							Unique	5.74073	High	0	4.632e-05
High	[R].EDKSDQSDDEKIQNSDDEER.[A]	3xTMT6plex [N-Term; K3; K11]; 1xPhospho [S7(99.1)]	20270337 1xPhospho [S162(100)]	0.000433825	0	1	5	5	20270337	20270337 [148-167]	2	3149.44	S15(Phospho): 100	996	364.7	1129.9	1710.3	432.5	1068.8	784.7	1279	780.3	662.5																996	Unique	5.64439	High	0	0.0004355
High	[K].KGNAEGSSDEEGKLVIDEPAK.[E]	4xTMT6plex [N-Term; K1; K13; K21]; 1xPhospho [S8(99.5)]		0.000197298	0	1	5	8	186928819	186928819 [142-162]	2	3169.68	S8(Phospho): 99.49	218.3	706.3	183.8	259.8	696.7	309.5	351	513.7	426.4	368.6	70.67	62.02	56.53	65.91	63.8	69.99	61.15	67.21	62.07	71.14							Unique	5.58921	High	0	0.000192
High	[K].QKSDAEEDGGTVSQEEEDR.[K]	2xTMT6plex [N-Term; K2]; 1xPhospho [S3(100)]	767938662 1xPhospho [S608(100)]	0.000267471	0	1	2	17	767938662	767938662 [606-624]	1	2647.18	S3(Phospho): 100	974.9	693.6	1289.1	937.5	861.5	1941.1	819.2	928.3	1034.1	823.5	140.63	147.76	142.92	143.78	112.9	133.67	144.34	137.17	151.2	134.24						3006.9	Unique	5.9026	High	0	0.0003854
High	[K].GEPAAAAAPEAGASPVEK.[E]	2xTMT6plex [N-Term; K18]; 1xPhospho [S14(100)]	153070260 1xPhospho [S101(100)]	5.77602e-05	0	1	1	8	153070260	153070260 [88-105]	0	2161.09	S14(Phospho): 100	679.9	1930.1	3393.8	864.5	1273.5	2389.5	2862.2	1212.3	1497.6	1139	2.44	0.57	28.39	5.86	22.22	3.59	4.83	2.05	1.81	40.17							Unique	5.87068	High	0	5.382e-05
High	[R].RVIENADGSEEETDTR.[D]	1xTMT6plex [N-Term]; 1xPhospho [S9(100)]	92091586 1xPhospho [S1961(100)]	0.000139193	0	1	2	3	92091586	92091586 [1953-1968]	1	2129.95	S9(Phospho): 100	210.9	498.4	219.3	229.7	367.4	308.1	169.9	234.3	389.4	237.2																210.9	Unique	5.30262	High	0	0.0001156
High	[R].KGSGSEQEGEDEEGGER.[K]	2xTMT6plex [N-Term; K1]; 1xPhospho [S3(100)]	7661950 1xPhospho [S941(100)]	0.000417928	0	1	1	7	7661950	7661950 [939-955]	1	2318.02	S3(Phospho): 100	349.1	1320.3	788.2	2022.7	1767.6	2288.5	1064.6	1646.9	1836.5	950.5	45.65	80.37	64.06	76.78	78.99	80.59	69.18	71.97	78.19	50.16							Unique	5.54127	High	0	0.0004261
High	[K].ENQSEGKGSDSDSEGDNPEK.[K]	3xTMT6plex [N-Term; K7; K20]; 2xPhospho [S9(100); S11(99)]	7019569 2xPhospho [S95(100); S97(99.2)]	0.000404988	0	1	1	4	7019569	7019569 [87-106]	1	2956.27	S9(Phospho): 100; S11(Phospho): 99.37	553.8	386.8	587.3	593.8	322.9	567.1	290.4	740.3	488.2	464.6																553.8	Unique	4.77241	High	0	0.0004174
High	[K].HSGPNSADSANDGFVR.[L]	1xTMT6plex [N-Term]; 1xPhospho [S6(100)]	148470404 1xPhospho [S104(100)]	0.000234695	0	1	1	1	148470404	148470404 [99-114]	0	1939.85	S6(Phospho): 100	92.7	138.7	104	132.3	150	120.4	88.2	111.7	107.1	87.1																92.7	Unique	5.1157	High	0	0.0002412
High	[R].STSTLEIQPSRASPTSDIESVER.[K]	1xTMT6plex [N-Term]; 1xPhospho [S13(100)]	578826238 1xPhospho [S683(100)]	0.000214669	0	1	11	2	578826238	578826238 [671-693]	1	2799.36	S13(Phospho): 99.99	36.6	133.4	59.3	128.1	158.7	108.2	104.7	167	103	109.4	10.7	4.88	2.08	7.71	6.14	3.95	0.27	14.51	6.09	28.74							Unique	4.46321	High	0	0.0002149
High	[R].SQSSDTEQQSPTSGGGK.[V]	2xTMT6plex [N-Term; K17]; 1xPhospho [S10(100)]		0.000245743	0	1	2	94	664805999	664805999 [500-516]	0	2219.02	S4(Phospho): 99.63	8540	25092.9	10596.4	5289.5	6293.7	6780.1	13808.1	4385.1	7441.4	5922	87.68	115.89	75.88	69.5	84.8	76.39	93.05	84.9	80.5	76.89						112.1	Unique	5.33531	High	0.0002786	0.0005494
High	[R].RPDIQYPDATDEDITSHMESEELNGAYK.[A]	2xTMT6plex [N-Term; K28]; 1xOxidation [M18(100)]; 1xPhospho [T/S/Y]	4759166 1xPhospho [T176(99.3)]; 91206462 1xPhospho [T190(99.3)]; 91598939 1xPhospho [T163(99.3)]	8.76228e-06	0	3	5	15	4759166; 91206462; 91598939	4759166 [162-189]; 91206462 [176-203]; 91598939 [149-176]	0	3778.72	T15(Phospho): 100; M18(Oxidation): 100	447.2	532.5	80.4	315.8	354.7	133	66.1	78.5	121.4	199.4	28.6	18.04	57.5	29.41	5.62	49.4	11.68	72.84	35.62	20.05							Not Unique	6.10858	High	0	2.197e-05
High	[R].RPDIQYPDATDEDITSHMESEELNGAYK.[A]	2xTMT6plex [N-Term; K28]; 1xOxidation [M18(100)]; 2xPhospho [S20(100); T/S/Y]		1.63349e-05	0	3	5	8	4759166; 91206462; 91598939	4759166 [162-189]; 91206462 [176-203]; 91598939 [149-176]	0	3858.69	T15(Phospho): 99.34; M18(Oxidation): 100; S20(Phospho): 100	715.9	477.7	110.1	332.3	224.4	200.4	69.1	103	104.2	126	36.55	23.32	48.12	51.44	49.09	43.59	42.58	28.02	58.01	56.47							Not Unique	6.08395	High	0	4.72e-05
High	[K].SLDSDESEDEEDDYQQKR.[K]	2xTMT6plex [N-Term; K17]; 1xPhospho [S7(99.3)]	7657441 1xPhospho [S63(99.3)]	4.04255e-05	0	1	1	2	7657441	7657441 [57-74]	1	2726.17	S4(Phospho): 100	364.2	259.1	582.1	879.3	284.8	449.6	600	417	865.6	795.2																364.2	Unique	6.54531	High	0	1.404e-05
High	[K].AAEEQGDDQDSEKSKPAGSDGER.[R]	3xTMT6plex [N-Term; K13; K15]; 2xPhospho [S11(100); S19(98.9)]	118601081 2xPhospho [S185(100); S188(99.6)]	0.000375775	0	1	1	10	118601081	118601081 [175-197]	1	3253.45	S11(Phospho): 99.24; S19(Phospho): 99.24	851.8	2066.4	1387.9	1523.1	1310.7	1942.8	786.2	1523.4	2288.5	1373.9																851.8	Unique	5.40242	High	0	0.0003952
High	[R].KGSGSEQEGEDEEGGER.[K]	2xTMT6plex [N-Term; K1]; 2xPhospho [S3(100); S5(100)]	7661950 2xPhospho [S941(100); S943(100)]	0.000404988	0	1	1	3	7661950	7661950 [939-955]	1	2397.98	S3(Phospho): 100; S5(Phospho): 100	767.6	409.2	753.5	823.5	755.9	784.3	826.8	899.6	896.2	812																767.6	Unique	5.72336	High	0	0.0004175
High	[K].AAEEQGDDQDSEKSKPAGSDGER.[R]	3xTMT6plex [N-Term; K13; K15]; 1xPhospho [S11(100)]	118601081 1xPhospho [S185(100)]	7.20163e-05	0	1	1	18	118601081	118601081 [175-197]	1	3173.48	S11(Phospho): 100	624.3	1936.2	1068	1685.9	1336.8	2262	570.7	2721	2766.4	1148.2	100.13	107.6	84.15	109.38	96.42	116.18	96.65	116.28	99.67	111.76						78	Unique	5.6673	High	0	3.886e-05
High	[R].DSSSDSDSSSSEEEEEKTSK.[S]	3xTMT6plex [N-Term; K17; K20]; 1xPhospho [S/T]	530394600 1xPhospho [S489(99)]	8.56189e-05	0	1	4	10	530394600	530394600 [479-498]	1	2917.29	S6(Phospho): 99.67	87.5	994.1	471.6	1422.4	636.4	697.8	601.3	1209.2	1686.1	408.4																87.5	Unique	6.2835	High	0	6.705e-05
High	[K].DSYETSQLDDQSAETHSHK.[Q]	2xTMT6plex [N-Term; K19]; 1xPhospho [T/S/Y]	4759166 1xPhospho [S220(100)]; 91206462 1xPhospho [S234(100)]; 91598939 1xPhospho [S207(100)]	1.23582e-05	0	3	5	9	4759166; 91206462; 91598939	4759166 [209-227]; 91206462 [223-241]; 91598939 [196-214]	0	2716.21	S12(Phospho): 100	913.5	670.5	261.6	483.4	529.2	288.7	163.9	233.8	261.6	314.5	10.1	60.64	26.09	60.69	59.92	34.45	23.85	23.35	21.27	36.61						812.5	Not Unique	6.48024	High	0	3.076e-06
High	[K].AEGDSAGTAGTPGGTPAGDK.[V]	2xTMT6plex [N-Term; K20]; 1xPhospho [T11(100)]	148536864 1xPhospho [T217(100)]	0.000166502	0	1	3	1	148536864	148536864 [207-226]	0	2255.06	T11(Phospho): 100	258.2	380.1	256.8	215.9	483.2	294.7	279.4	277.7	233.5	455.9																258.2	Unique	4.96886	High	0	0.0001511
High	[R].GSQGGGGGGSSSSSVVSSGGDEGYGTGGGGSSATSGGR.[R]	1xTMT6plex [N-Term]; 1xPhospho [S10(99.4)]	166795264 1xPhospho [S175(99.4)]	8.39136e-06	0	1	4	7	166795264	166795264 [166-203]	0	3417.43	S10(Phospho): 99.38	28.4	55.8	21	42.3	41.4	45.9	30.1	37.6	37.9	26.1																28.4	Unique	5.6678	High	0	8.752e-07
High	[K].EIQSGSSSSDAEESSEDNK.[K]	2xTMT6plex [N-Term; K19]; 1xPhospho [S15(99.7)]	530788276 1xPhospho [S1162(99.7)]	0.000164052	0	1	21	2	530788276	530788276 [1148-1166]	0	2524.1	S15(Phospho): 99.69	140.9	278.6	159.1	151.4	365.6	217.5	150.1	201.8	253.7	149.5																140.9	Unique	5.22282	High	0	0.0001479
High	[R].GPSPEGSSSTESSPEHPPK.[S]	2xTMT6plex [N-Term; K19]; 2xPhospho [S12(100); S13(100)]	118572613 2xPhospho [S1657(100); S1658(100)]	0.000239449	0	1	2	18	118572613	118572613 [1646-1664]	0	2512.1	S12(Phospho): 100; S13(Phospho): 100	1241.9	2191.3	1215.7	1577.2	2682	3120.3	1291.8	2407.5	1973	1872.8																1241.9	Unique	5.33475	High	0	0.0002472
High	[K].GFEEEHKDSDDDSSDDEQEK.[K]	3xTMT6plex [N-Term; K7; K20]; 2xPhospho [S13(100); S14(100)]	55749531 2xPhospho [S435(100); S436(100)]	0.000181899	0	1	4	4	55749531	55749531 [423-442]	1	3188.31	S13(Phospho): 100; S14(Phospho): 100	286.6	256.7	237.2	259.4	312.5	428.5	172.6	346	302.7	264.8																286.6	Unique	5.16553	High	0	0.000172
High	[K].GFEEEHKDSDDDSSDDEQEK.[K]	3xTMT6plex [N-Term; K7; K20]; 1xPhospho [S9(99)]	55749531 1xPhospho [S431(99)]	0.000230481	0	1	4	2	55749531	55749531 [423-442]	1	3108.34	S9(Phospho): 98.97	243.6	332	179	274.1	398.3	321.1	192.7	505.1	297.5	188.9																243.6	Unique	5.02847	High	0	0.0004082
High	[K].EIQNGNLHESDSESVPR.[D]	1xTMT6plex [N-Term]; 1xPhospho [S10(100)]	1034587017 1xPhospho [S75(100)]	8.54339e-05	0	1	10	3	1034587017	1034587017 [66-82]	0	2220.01	S10(Phospho): 100	131.9	173.7	277	311.5	120.8	241.1	259.3	166	151	123.1																131.9	Unique	5.94817	High	0	5.208e-05
High	[K].ELFGDDSEDEGASHHSGSDNHSER.[S]	1xTMT6plex [N-Term]; 2xPhospho [S13(98.1); S]	20270337 2xPhospho [S72(98.1); S]	0.000133912	0	1	5	4	20270337	20270337 [60-83]	0	3003.13	S16(Phospho): 100; S18(Phospho): 100	127.2	123.9	125.3	143.7	115.5	156.1	86.7	133.5	161.9	172.9																127.2	Unique	5.2503	High	0	0.0001089
High	[R].TYESGSESGDSDESESK.[S]	2xTMT6plex [N-Term; K17]; 1xPhospho [S11(100)]	118600981 1xPhospho [S1631(100)]	0.00031803	0	1	7	2	118600981	118600981 [1621-1637]	0	2331.98	S11(Phospho): 100	114	77.9	82.7	152.4	237.6	59.3	104.5	190.9	116.5	45.3																114	Unique	5.46535	High	0	0.0003492
High	[R].DSSSDSDSSSSEEEEEKTSK.[S]	3xTMT6plex [N-Term; K17; K20]; 2xPhospho [S10(99.6); S11(100)]	530394600 2xPhospho [S487(99.2); S/T]	0.000337853	0	1	4	7	530394600	530394600 [479-498]	1	2997.26	S10(Phospho): 99.6; S11(Phospho): 100	173.1	281.5	375.9	1026.6	349.6	537.1	483	802.8	862.3	618.1																173.1	Unique	3.90359	High	0	0.0003605
High	[K].SSAGDTEFVHQNSQEIQR.[S]	1xTMT6plex [N-Term]; 1xPhospho [S13(100)]	1034646920 1xPhospho [S253(100)]	0.000435219	0	1	1	1	1034646920	1034646920 [241-258]	0	2342.06	S13(Phospho): 100	120.1	185.2	191.8	180.9	166.7	170.6	147.1	142	153	176.8																120.1	Unique	4.69773	High	0	0.0004363
High	[K].HDDGTQSDSENAGAHR.[R]	1xTMT6plex [N-Term]; 1xPhospho [T/S]	578802413 1xPhospho [S379(99.1)]	0.000200591	0	1	22	5	578802413	578802413 [373-388]	0	2005.82	T5(Phospho): 50; S7(Phospho): 50		267.9	333.8					368	401.3			15.84	27.35					39.41									Unique	4.40862	High	0	0.0004029
High	[R].LIHGEDSDSEGEEEGR.[G]	1xTMT6plex [N-Term]; 2xPhospho [S7(100); S9(100)]	530412646 2xPhospho [S87(100); S89(100)]	0.000368006	0	1	4	25	530412646	530412646 [81-96]	0	2147.84	S7(Phospho): 100; S9(Phospho): 100	1524.7	872.3	737.3	981.7	1196.9	2210.6	800.5	2190.2	1535.4	1514.7																1524.7	Unique	4.90317	High	0	0.0003882
High	[K].KAEQGSEEEGEGEEEEEEGGESK.[A]	3xTMT6plex [N-Term; K1; K23]; 1xPhospho [S6(100)]	69354671 1xPhospho [S228(100)]	3.45738e-06	0	1	1	20	69354671	69354671 [223-245]	1	3249.44	S6(Phospho): 100	3724.8	863.4	3070.5	3509.1	2360.8	2247.3	3274.1	3476.8	3423.9	3315.1	88.64	72.05	69.61	88.1	82.4	82.76	89.03	91.56	77.77	87.1						294.6	Unique	9.07535	High	0	1.834e-07
High	[R].SQSPAASDCSSSSSSASLPSSGR.[S]	1xTMT6plex [N-Term]; 1xCarbamidomethyl [C9]; 1xPhospho [S3(99.3)]	14043024 1xPhospho [S173(100)]	4.10421e-05	0	1	2	3	14043024	14043024 [171-193]	0	2509.07	S3(Phospho): 100	240.7	183.3	244	152.6	321.2	164.7	199.9	140.8	211.2	163.9																240.7	Unique	7.02462	High	0	1.444e-05
High	[R].DQSSWQNSDASQEVGGHQER.[Q]	1xTMT6plex [N-Term]; 1xPhospho [S11(100)]	110556636 1xPhospho [S1054(100)]	0.000213356	0	1	2	1	110556636	110556636 [1044-1063]	0	2554.08	S11(Phospho): 100	148	108.2	149.4	151.2	168.5	158.5	120	100.5	115.7	131.5																148	Unique	4.70086	High	0	0.0002136
High	[R].RGEGDAPFSEPGTTSTQRPSSPETATK.[Q]	2xTMT6plex [N-Term; K27]; 1xPhospho [S21(99.4)]	118572613 1xPhospho [S323(99.5)]	1.64768e-05	0	1	2	9	118572613	118572613 [303-329]	1	3329.61	S21(Phospho): 99.36	146.7	456.1	140.9	662.8	154.3	143.8	693.4	273	429.6	313.9	32.69	20.05	26.46	19	17.99	3.75	19.99	11	11.8	17.66							Unique	7.55902	High	0	4.274e-06
High	[R].NYQQNYQNSESGEKNEGSESAPEGQAQQR.[R]	2xTMT6plex [N-Term; K14]; 1xPhospho [S/Y]		5.24039e-05	0	1	1	13	34098946	34098946 [157-185]	1	3795.69	S11(Phospho): 98.95	276.3	115.4	519.8	237.9	224.6	230.8	121.9	293.8	269.1	220.1	95.27	59.46	88.05				101.57		108.62							580.3	Unique	5.37836	High	0	0.0001546
High	[K].YSSNDESEGSGSEK.[S]	2xTMT6plex [N-Term; K14]; 1xPhospho [S10(100)]	38788333 1xPhospho [S867(100)]	0.000396913	0	1	3	8	38788333	38788333 [856-869]	0	2013.87	S12(Phospho): 100	365.9	812.4	322.7	452.9	512.2	378.9	272.9	568.2	492.3	187.6	48.93	4.5	60.5	27.47	83.33	48.55	70.91	31.96	45.97	50.32						239.3	Unique	5.12281	High	0	0.0004117
High	[K].DSYETSQLDDQSAETHSHK.[Q]	2xTMT6plex [N-Term; K19]; 2xPhospho [S6(99.5); S12(100)]	4759166 2xPhospho [S214(99.5); S220(100)]; 91206462 2xPhospho [S228(99.5); S234(100)]; 91598939 2xPhospho [S201(99.5); S207(100)]	0.000433825	0	3	5	1	4759166; 91206462; 91598939	4759166 [209-227]; 91206462 [223-241]; 91598939 [196-214]	0	2796.18	S6(Phospho): 99.5; S12(Phospho): 100	261.6	281.5	57.4	230.6	196.6	73.4	24.7	42.9	59.6	102.1																	Not Unique	4.75987	High	0	0.0004357
High	[R].EKEEEEEPEGKPSDAESSESSDDEK.[A]	4xTMT6plex [N-Term; K2; K11; K25]; 1xPhospho [S13(100)]	171460958 1xPhospho [S543(100)]	0.000274847	0	1	5	5	171460958	171460958 [531-555]	1	3792.75	S13(Phospho): 100	154.2	417.1	152.6	178.2	159	237.7	111.5	294.4	153.6	183.5																154.2	Unique	5.42106	High	0	0.0003503
High	[K].ELVSSSSSGSDSDSEVDK.[K]	2xTMT6plex [N-Term; K18]; 2xPhospho [S12(98.6); S]	1034643401 2xPhospho [S10(99.2); S]	0.000106982	0	1	1	149	1034643401	1034643401 [6-23]	0	2433.04	S12(Phospho): 100; S14(Phospho): 100	1430.4	3433.7	4880.9	5873.4	7807.6	4656.3	3226.5	4112.6	5986.2	4977.9	42.56	31.8	14.31	18.87	47.02	57.27	3.86	3.22	4.64	44.58						1871.4	Unique	5.17945	High	0	7.609e-05
High	[K].QNLLAPQNAVSSEETNDFKQETLPSK.[S]	3xTMT6plex [N-Term; K19; K26]; 1xPhospho [S/T]		0.000228628	0	1	2	6	91206462	91206462 [52-77]	1	3655.88	S11(Phospho): 50; S12(Phospho): 50	122.8	120.4	70.8	96.6	74.3	53.7	27.5	48.4	55.7	90.9																	Unique	3.29748	High	0	0.0002334
High	[R].HAYEGSSSGNSSPEYPR.[K]	1xTMT6plex [N-Term]; 1xPhospho [S/Y]	119829187 1xPhospho [S118(99.6)]	0.00033663	0	1	1	16	119829187	119829187 [107-123]	0	2133.91	S12(Phospho): 99.58	185.4	72.4	113.4	305.7	76.7	152.5	59.1	73.5	144.2	67.4		55.92		110.64	66.09	72.61		54.19		57.2						185.4	Unique	4.75872	High	0	0.0004081
High	[R].REQGGSGLGSGSSGGGGSTSGLGSGYIGR.[V]	1xTMT6plex [N-Term]; 1xPhospho [S13(100)]	148277037 1xPhospho [S21(100)]	2.66884e-05	0	1	1	3	148277037	148277037 [9-37]	1	2851.32	S13(Phospho): 99.62		91.8	68.4	48.3	124		66.3	109.7	86.9	125.2		31.47	31.67		3.44		2.91	24.57	20.19								Unique	5.25079	High	0	1.314e-05
High	[K].SQSVPGAWPGASPLSSQPLSGSSR.[Q]	1xTMT6plex [N-Term]; 1xPhospho [S3(98.5)]	1034616234 1xPhospho [S821(100)]	2.37467e-05	0	1	18	5	1034616234	1034616234 [819-842]	0	2649.29	S3(Phospho): 100	547.2	439.8	345.7	295.9	473.2	537.7	214.8	378.7	460.1	266.3	85.82	55.68	77.09	55.27	37.51	66.82	45.4	65.72	70.84	98.76							Unique	5.96423	High	0	5.494e-06
High	[R].GSGGGGGGGGQGSTNYGK.[S]	2xTMT6plex [N-Term; K18]; 1xPhospho [S2(100)]	55956921 1xPhospho [S255(100)]	3.45964e-05	0	1	1	3	55956921	55956921 [254-271]	0	1992.92	S2(Phospho): 100	149.4	208.7	875.6	83.6	188.4	123.9	234.7	110.3	117.3	408.5	55.09	18.34	26.4		60.16	8.26	27.17	67.24	0.69	37.51							Unique	5.77082	High	0	1.066e-05
High	[R].LHSAEQDADDEAADDTDDTSSVTSSASSTTSSQSGSGTSR.[K]	1xTMT6plex [N-Term]; 1xPhospho [S27(99.6)]		2.29587e-07	0	1	4	14	530412646	530412646 [473-512]	0	4272.75	S27(Phospho): 99.58	35.9	28.4	31.8	36.2	42.4	30.7	27.6	38.2	29.6	26.7																35.9	Unique	7.27749	High	0	1.529e-09
High	[K].AASSSSSSSSSSSSDDSEEEKAAATPK.[K]	3xTMT6plex [N-Term; K21; K27]; 1xPhospho [S/T]		0.000236588	0	1	4	6	530394600	530394600 [215-241]	1	3344.55	S6(Phospho): 33.14; S7(Phospho): 33.14; S8(Phospho): 33.14																											No Quan Values	3.83347	High	0	0.0002783
High	[K].TSQVGAASAPAKESPR.[K]	2xTMT6plex [N-Term; K12]; 1xPhospho [S14(100)]	530380671 1xPhospho [S381(100)]; 207113162 1xPhospho [S381(100)]; 530380673 1xPhospho [S381(100)]	0.000151636	0	3	19	5	530380671; 207113162; 530380673	530380671 [368-383]; 207113162 [368-383]; 530380673 [368-383]	1	2095.09	S14(Phospho): 100	195.3	271.8	383.1	1414.8	275.9	463.6	396.4	244.8	1307.4	257.3	55.95	68.2	65.94	74.66	63.45	47.72	70.71	60.23	71.15	56.2					76.8		Not Unique	5.78522	High	0	0.000132
High	[K].IDASKNEEDEGHSNSSPR.[H]	2xTMT6plex [N-Term; K5]; 1xPhospho [S]		0.000204773	0	1	2	40	14110420	14110420 [68-85]	1	2510.16	S16(Phospho): 99.65	215.6	769.8	822.2	657.5	388.1	1018.6	454.9	857.4	1277.1	451.2	99.15	60.33	60.46	57.6	76.64	63.41	39.96	71.87	65.94	68.31							Unique	5.95614	High	0	0.0002084
High	[R].LASPSGSTSSGLEVVAPEGTSAPGGGPGTLDDSATICR.[V]	1xTMT6plex [N-Term]; 1xCarbamidomethyl [C37]; 1xPhospho [S3(100)]	5032179 1xPhospho [S594(100)]	0.000427576	0	1	1	13	5032179	5032179 [592-629]	0	3867.82	S3(Phospho): 99.03	302.7	189.2	212.8	184.5	264.3	232.7	182.1	204.6	226.7	235.8																302.7	Unique	5.44817	High	0	0.0004322
High	[K].APSEEELHGDQTDFGQGSQSPQKQEEQR.[Q]	2xTMT6plex [N-Term; K23]; 1xPhospho [S20(100)]		0.000266429	0	1	1	8	239582767	239582767 [68-95]	1	3680.69	S20(Phospho): 100	326.8	243.1	549.5	253.8	489.1	344.4	243	420.4	329.4	704.9																326.8	Unique	5.46071	High	0	0.0002809
High	[K].QASASYDSEEEEEGLPMSYDEK.[R]	2xTMT6plex [N-Term; K22]; 1xPhospho [S8(99.7)]	11067749 1xPhospho [S563(100)]	0.000126347	0	1	3	4	11067749	11067749 [556-577]	0	3032.3	S8(Phospho): 100	87	43.9	72.4	86.2	60.1	52.1	67.4	122	69	68.3																87	Unique	5.08695	High	0	9.944e-05
High	[R].ELDDSSSESSDLQLEGPSTLR.[V]	1xTMT6plex [N-Term]; 1xPhospho [S/T]		8.45151e-05	0	1	3	22	15451779	15451779 [526-546]	0	2574.17	S10(Phospho): 100	573.2	1177.4	505.7	581.5	560	606.9	517.6	603.4	622.8	588.3																573.2	Unique	6.02056	High	0	5.126e-05
High	[R].VVLGDGVQLPPGDYSTTPGGTLFSTTPGGTR.[I]	1xTMT6plex [N-Term]; 2xPhospho [T26(99); S/T/Y]	4758258 2xPhospho [T46(99); S/T/Y]	0.000338465	0	1	1	15	4758258	4758258 [21-51]	0	3436.63	T17(Phospho): 97.23; T26(Phospho): 98.59	116.6	72.1	113.2	55.3	95.8	82.5	59.6	42.4	70.2	73.2	98.12	64.36	106.86	103.74	84.45	58.2	77.83	82.36	94.63	75.7				93.2	240.9		Unique	3.79766	High	0	0.0004059
High	[R].GTGQSDDSDIWDDTALIK.[A]	2xTMT6plex [N-Term; K18]; 1xPhospho [S5(100)]	4507091 1xPhospho [S28(100)]	0.000193246	0	1	10	5	4507091	4507091 [24-41]	0	2475.17	S5(Phospho): 100	577	832.6	1400.2	2094.2	1323.2	2160	1289.3	1894	1199.3	1552.1	68.14	67.71	69.56	71.86	71.52	70.82	77.91	75.35	63.11	67.41				299	855		Unique	6.06959	High	0	0.0001945
High	[R].AQEEGPGEPPPPELALLPPPPPPPPTPATPTSSASNLDLGEQR.[E]	1xTMT6plex [N-Term]; 1xPhospho [T29(100)]	56118234 1xPhospho [T98(100)]	4.03991e-06	0	1	1	5	56118234	56118234 [70-112]	0	4655.31	T29(Phospho): 99.99	301.1	88.5	143.1	108.7	204	183.2	117.8	199.2	263.2	135.2	13.78	59.23	45.69	43.75	21.21	39.43	44.06	25.98	34.21	68.78				271.8	330.5		Unique	7.4538	High	0	2.41e-07
High	[K].ATDIPASASPPPVAGVPFFK.[Q]	2xTMT6plex [N-Term; K20]; 1xPhospho [S9(100)]	530365132 1xPhospho [S262(100)]	0.000142822	0	1	3	4	530365132	530365132 [254-273]	0	2507.34	S9(Phospho): 100	831.2	369.3	1095.5	598.1	387.6	687.9	748.7	520.8	1108.1	962.6	3.69	0.93	0.65	9.11	3.32	6.83	2.69	3.8	8.61	1.78				809.6	852.9		Unique	5.29845	High	0	0.0001205
High	[K].QVVSVVQDEEVGLPFEASPESPPPASPDGVTEIR.[G]	1xTMT6plex [N-Term]; 1xPhospho [S26(100)]	767958073 1xPhospho [S676(100)]	4.46922e-07	0	1	4	4	767958073	767958073 [651-684]	0	3870.89	S26(Phospho): 100	384.1	321.4	438.5	290.3	183.4	298.5	369.9	275.3	396.5	292.9	7.75	3.89	7.34	15.11	19.32	14.35	24.72	25.14	27.7	12.67				363	405.1		Unique	9.70897	High	0	1.007e-08
High	[K].LIDLEDSADVGDQPGEVGYSGSPAEAPPSK.[S]	2xTMT6plex [N-Term; K30]; 1xPhospho [S22(99.6)]	190886435 1xPhospho [S392(99.6)]	2.68621e-05	0	1	11	9	190886435	190886435 [371-400]	0	3538.69	S22(Phospho): 99.64	449.5	160.1	322.6	397.2	208.2	292.9	365.6	361.7	536.1	303.3	65.62	45.15	50.99	49.28	51.85	38.86	68.92	65.67	37.08	19.88				658.1	240.9		Unique	5.11153	High	0	6.829e-06
High	[K].SLGGSSLTETEAAPSLTLPSVDYIPQDSPTPSVR.[Q]	1xTMT6plex [N-Term]; 1xPhospho [S28(100)]	256574805 1xPhospho [S558(100)]	6.09292e-06	0	1	1	6	256574805	256574805 [531-564]	0	3781.86	S28(Phospho): 100	383.9	181	230.2	186.1	184.2	296.2	215.4	212.2	493.1	277.6	62.03	55.58	43.79	79.03	39.42	37.8	25.56	61.63	41.09	60.56				215.5	552.3		Unique	6.85395	High	0	4.983e-07
High	[R].SSPGQTPEEGAQALAEFAALHGPALR.[A]	1xTMT6plex [N-Term]; 1xPhospho [S2(99.5)]		1.86141e-07	0	1	1	8	11056036	11056036 [15-40]	0	2914.43	S1(Phospho): 50; S2(Phospho): 50	398.3	391.5	444.3	264.4	210.5	386.7	337.7	201.9	550.1	425.7	15.74	10.08	18.05	10.25	14.16	9.45	10.77	0.78	9.25	10.61				442.6	354		Unique	9.49034	High	0	1.056e-09
High	[R].ILEGPQQSLSGSPLQPIPASPPPQIPPGLRPR.[F]	1xTMT6plex [N-Term]; 1xPhospho [S]	662236821 1xPhospho [S130(100)]	3.38562e-05	0	1	2	7	662236821	662236821 [119-150]	0	3633.97	S12(Phospho): 100	158.6	55	132.1	95.6	86.9	141.6	103.9	125.1	195.7	175.5	17.84	85.78	62.55	36.2	61.1	67.3	55.93	54.16	67.47	36.41				178.6	138.6		Unique	5.92097	High	0	1.025e-05
High	[R].DNLTLWTADNAGEEGGEAPQEPQS.[-]	1xTMT6plex [N-Term]; 1xPhospho [S24(100)]	5454052 1xPhospho [S248(100)]	5.65245e-05	0	1	1	3	5454052	5454052 [225-248]	0	2838.23	S24(Phospho): 100	263	97.1	193.3	268.5	49.6	132.5	148	54.2	85.7	164.5	44.33	44.05	23.6	38.61	36.6	27.79	10.14	12.42	33.56	22.01				180.6	345.4		Unique	4.89885	High	0	2.538e-05
High	[K].QASASYDSEEEEEGLPMSYDEK.[R]	2xTMT6plex [N-Term; K22]; 1xOxidation [M17(100)]; 1xPhospho [S/Y]	11067749 1xPhospho [S563(100)]	0.000425501	0	1	3	2	11067749	11067749 [556-577]	0	3048.3	S8(Phospho): 100; M17(Oxidation): 100	250.2	133.9	188.6	229.2	130.5	146.8	175.1	272.6	180.5	147.3																250.2	Unique	4.95586	High	0	0.0004306
High	[K].VEMGTSSQNDVDMSWIPQETLNQINKASPR.[R]	2xTMT6plex [N-Term; K26]; 1xOxidation [M13(100)]; 1xPhospho [T/S]	169404009 1xPhospho [S268(100)]	8.78699e-05	0	1	2	3	169404009	169404009 [241-270]	1	3929.88	M13(Oxidation): 100; S28(Phospho): 100	61.5	61.7	63.9	66.2	95.8	104.9	133.3	83.8	101.9	103.2																61.5	Unique	5.32345	High	0	5.468e-05
High	[K].VEMGTSSQNDVDMSWIPQETLNQINKASPR.[R]	2xTMT6plex [N-Term; K26]; 2xOxidation [M3(100); M13(100)]; 1xPhospho [S28(100)]	169404009 1xPhospho [S268(100)]	0.000206042	0	1	2	7	169404009	169404009 [241-270]	1	3945.88	M3(Oxidation): 100; M13(Oxidation): 100; S28(Phospho): 100	64	222.9	317.2	119.2	122.9	198.9	458.1	68.8	300.4	531.5		90.74	111.98	48.23	98.55	64.11	97.63		84.02	109.63					64		Unique	5.4891	High	0	0.0002036
High	[R].TPEELDDSDFETEDFDVR.[S]	1xTMT6plex [N-Term]; 1xPhospho [S8(100)]	1022434686 1xPhospho [S641(100)]	0.000272724	0	1	12	28	1022434686	1022434686 [634-651]	0	2468.02	S8(Phospho): 100	580.5	852.8	705.5	1007.2	715.4	1083.4	497.1	818	1265.8	1298.1	54.54	74.35	68.16	71.85	63.47	54.11	34.61	42.31	60.92	82.46							Unique	5.16724	High	0	0.000289
High	[K].ESSTSEGADQKMSSPEDDSDTKR.[L]	3xTMT6plex [N-Term; K11; K22]; 1xOxidation [M12(100)]; 2xPhospho [S13(100); S14(100)]	321267469 2xPhospho [S383(100); S384(100)]	9.1754e-05	0	1	8	6	321267469	321267469 [371-393]	2	3350.46	M12(Oxidation): 100; S13(Phospho): 100; S14(Phospho): 100	2002.9	1279.6	1519.7	2259.4	1312.2	1639.7	1565.4	2357.8	1835.3	1952.6																2002.9	Unique	5.60455	High	0	5.885e-05
High	[K].ESSTSEGADQKMSSPEDDSDTKR.[L]	3xTMT6plex [N-Term; K11; K22]; 2xPhospho [S13(100); S14(100)]	321267469 2xPhospho [S383(100); S384(100)]	0.000107678	0	1	8	1	321267469	321267469 [371-393]	2	3334.46	S13(Phospho): 100; S14(Phospho): 100	196.3	56	194.9	217.1	65.6	179.3	162.9	193.6	164.5	183.5																196.3	Unique	4.95412	High	0	7.697e-05
High	[K].ESSTSEGADQKMSSPEDDSDTKR.[L]	3xTMT6plex [N-Term; K11; K22]; 1xOxidation [M12(100)]; 1xPhospho [T21(93.3)]		0.000407697	0	1	8	4	321267469	321267469 [371-393]	2	3270.49	M12(Oxidation): 100; S13(Phospho): 100	99.8	489.5	98.9	197.1	111.6	144.6	102	182.1	272.6	128.5																99.8	Unique	3.62496	High	0	0.000419
High	[R].RNSSSSSSPSERPR.[Q]	1xTMT6plex [N-Term]; 1xPhospho [S3(100)]	578821257 1xPhospho [S207(100)]	0.000313341	0	1	9	5	578821257	578821257 [205-218]	1	1842.87	S3(Phospho): 100	209.6	376.9	279.2	65	344	205.9	130	170.2	283.1	55	72.5	38.58	50.18		52.06	47.87	40.35	86.82	54.93								Unique	5.25757	High	0	0.0003349
High	[R].KDSDSGSDSDSDQENAASGSNASGSESDQDER.[G]	2xTMT6plex [N-Term; K1]; 1xPhospho [S]	20270337 1xPhospho [S36(99.6)]	2.2255e-05	0	1	5	13	20270337	20270337 [19-50]	1	3772.52	S18(Phospho): 50; S20(Phospho): 50	72.8	74.8	129.6	159.4	50.9	223.1	87.7	283.5	189.9	48.3																72.8	Unique	5.37433	High	0	4.887e-06
High	[R].SSASLSGSSSSSSSSR.[S]	1xTMT6plex [N-Term]; 1xPhospho [S]		0.000413822	0	1	32	7	1034554585	1034554585 [376-391]	0	1769.78	S12(Phospho): 49.76; S13(Phospho): 49.76	38.3	303.6	42.6	52.2	199.9	52.1	42.6	43.4	45.9	13.8																38.3	Unique	4.28347	High	0	0.0004232
High	[R].SSHSSDSGGSDVDLDPTDGK.[L]	2xTMT6plex [N-Term; K20]; 2xPhospho [S7(100); S10(100)]	166851840 2xPhospho [S212(100); S215(100)]	0.000287835	0	1	1	1	166851840	166851840 [206-225]	0	2581.07	S7(Phospho): 100; S10(Phospho): 100																											No Quan Values	4.90448	High	0	0.0003062
High	[K].DDSHSAEDSEDEKEDHK.[N]	3xTMT6plex [N-Term; K13; K17]; 1xPhospho [S9(100)]	56118310 1xPhospho [S79(100)]	0.000357154	0	1	2	8	56118310	56118310 [71-87]	1	2740.22	S9(Phospho): 100	947.3	882.1	1331.3	864.3	1525.6	535.2	729.6	1033.8	713.9	1128.5																947.3	Unique	5.12507	High	0	0.0003787
High	[R].QNQQSSSDSGSSSSSEDERPK.[R]	2xTMT6plex [N-Term; K21]; 1xPhospho [S15(100)]	1034554585 1xPhospho [S527(100)]	9.63703e-06	0	1	32	8	1034554585	1034554585 [513-533]	0	2765.23	S11(Phospho): 99.99	118.2	1367.1	147.7	611.5	546	619.3	277.1	655.9	281.5	117.2																118.2	Unique	6.19311	High	0	1.117e-06
High	[K].GGFSSNSASGGSGSQAR.[T]	1xTMT6plex [N-Term]; 1xPhospho [S]	32567786 1xPhospho [S20(100)]	0.000356521	0	1	1	14	32567786	32567786 [14-30]	0	1822.79	S7(Phospho): 100	169	192.2	143.8	160.5	467.7	227.4	4694.9	194.5	388.7	159.1	87.7	28.71	85.01	26.34	26.4	54.47	50.22	49.99	21.84	50.82							Unique	4.87571	High	0	0.0004291
High	[R].SPSPPPSPPPLPSPPSLPSPAAPEAPELPEPAQPSEAHAR.[Q]	1xTMT6plex [N-Term]; 2xPhospho [S]	47825361 2xPhospho [S37(98.9); S49(97.8)]	6.86701e-05	0	1	2	7	47825361	47825361 [31-70]	0	4370.1	S3(Phospho): 99.38; S7(Phospho): 100	694.3	349.6	444.1	275.8	264	426.3	336.7	272.9	399.7	444.1																694.3	Unique	6.71371	High	0	3.564e-05
High	[R].YPWPSSAPSAPPGNLYMTESTSPWPSSGSPQSPPSPPVQQPK.[D]	2xTMT6plex [N-Term; K42]; 1xPhospho [S35(100)]	6631075 1xPhospho [S289(100)]	0.000326346	0	1	2	1	6631075	6631075 [255-296]	0	4944.36	S35(Phospho): 100	60.1	61.7	81	58.4	49.4	50.6	38.3	61	54.7	59.3																60.1	Unique	5.44851	High	0	0.0003486
High	[R].HEDEQALLDQNSQTPPPSPFSVQAFNK.[G]	2xTMT6plex [N-Term; K27]; 2xPhospho [S18(100); S/T]	578824784 2xPhospho [T2708(99.4); S2712(100)]	1.18607e-05	0	1	30	3	578824784	578824784 [2695-2721]	0	3642.69	S12(Phospho): 50; T14(Phospho): 50; S18(Phospho): 100	261.1	403.5	362.2	214	201.9	182.1	288.4	180.3	203.4	312.8																261.1	Unique	5.90022	High	0	1.612e-06
High	[K].LTALNDSSLDLSMDSDNSMSVPSPTSATK.[T]	2xTMT6plex [N-Term; K29]; 2xOxidation [M13(100); M19(100)]; 1xPhospho [S23(100)]	32490557 1xPhospho [S537(100)]	0.000161634	0	1	7	2	32490557	32490557 [515-543]	0	3554.65	M13(Oxidation): 100; M19(Oxidation): 100; S23(Phospho): 100	61.8	29.1		36.7		58.2	56.6	77.2	39.9																61.8		Unique	4.13923	High	0	0.0001448
High	[K].LTALNDSSLDLSMDSDNSMSVPSPTSATK.[T]	2xTMT6plex [N-Term; K29]; 1xPhospho [S23(100)]	32490557 1xPhospho [S537(100)]	0.000177749	0	1	7	2	32490557	32490557 [515-543]	0	3522.66	S23(Phospho): 99.99	86.5	44.3	91.5	64.2	42.9	58.9	69.7	58	55.5	80.7																86.5	Unique	4.63988	High	0	0.0001665
High	[K].RSFEVEEVETPNSTPPR.[R]	1xTMT6plex [N-Term]; 1xPhospho [S2(100)]	767993263 1xPhospho [S61(100)]	0.000309276	0	1	6	1	767993263	767993263 [60-76]	1	2283.09	S2(Phospho): 100																											No Quan Values	6.0641	High	0	0.0003304
High	[K].EGQPSPADEKGNDSDGEGESDDPEK.[K]	3xTMT6plex [N-Term; K10; K25]; 1xPhospho [S14(100)]	17865802 1xPhospho [S108(99.4)]	0.000236588	0	1	2	10	17865802	17865802 [89-113]	1	3356.49	S14(Phospho): 100	2391.6	998.4	1272	1213.3	792.9	1335.3	1025	1403.2	1092.1	1077.1																2391.6	Unique	4.93848	High	0	0.0002436
High	[K].KEQESDEEEEEEEEDEPSGATTR.[S]	2xTMT6plex [N-Term; K1]; 1xPhospho [S5(100)]	767929747 1xPhospho [S3001(100)]	9.29523e-05	0	1	9	1	767929747	767929747 [2997-3019]	1	3220.36	S5(Phospho): 100	235	30	206.3	141	85.1	63.6	122.3	192.1	159	77.9																235	Unique	5.5993	High	0	6.03e-05
High	[K].NVQQDNSEAGTQPQVQTDAQQTSQSPPSPELTSEENK.[I]	2xTMT6plex [N-Term; K37]; 1xPhospho [S28(100)]	557357733 1xPhospho [S559(100)]	2.14516e-05	0	1	6	1	557357733	557357733 [532-568]	0	4536.11	S28(Phospho): 100	97.9	53.6	68.5	91.3	46.4	67.6	50.4	68.3	148.4	59																97.9	Unique	5.51816	High	0	4.586e-06
High	[K].SFEQPSSEASVEDSNQADVKSDEETDDGVDDLK.[I]	3xTMT6plex [N-Term; K20; K33]; 1xPhospho [S21(100)]	767935464 1xPhospho [S436(100)]	1.1784e-05	0	1	9	1	767935464	767935464 [416-448]	1	4339.97	S21(Phospho): 100	220.9	109.4	205.1	187.9	89.1	188.9	103.2	148.4	165	141.1																220.9	Unique	5.51208	High	0	1.592e-06
High	[K].SSQDGDTPAQASPPEEK.[VT]	2xTMT6plex [N-Term; K17]; 1xPhospho [S12(100)]	1034598618 1xPhospho [S466(100)]	0.000388917	0	1	14	2	1034598618	1034598618 [455-471]	0	2282.06	S12(Phospho): 100	331.1	316.3	388.7	362.7	397.6	501.7	259.1	401.9	496.5	360.9																331.1	Unique	4.89377	High	0	0.0004055
High	[R].AHSPAEGASVESSSPGPK.[K]	2xTMT6plex [N-Term; K18]; 1xPhospho [S3(100)]	767991788 1xPhospho [S62(100)]	8.54339e-05	0	1	5	9	767991788	767991788 [60-77]	0	2233.09	S3(Phospho): 100	268.6	373.6	499.2	280.7	506.8	451.1	271.4	313.9	522.7	270.4	76.87	48.36	29.33	11.27	34.56	37.98	18.55	27.82	13.68	38.1		122.6	414.6				Unique	5.32462	High	0	5.21e-05
High	[K].SDAEEDGGTVSQEEEDRKPK.[A]	3xTMT6plex [N-Term; K18; K20]; 2xPhospho [S1(100); T/S]	767938662 2xPhospho [S608(100); T/S]	0.000140092	0	1	2	1	767938662	767938662 [608-627]	1	3053.4	S1(Phospho): 100; T9(Phospho): 50; S11(Phospho): 50	149.9	119.6	173.3	142.2	179.9	263.7	126.5	163	181.3	270.4																149.9	Unique	6.02495	High	0	0.0001169
High	[K].GSSEQAESDNMDVPPEDDSKEGAGEQK.[T]	3xTMT6plex [N-Term; K20; K27]; 1xPhospho [S19(98.9)]	212549553 1xPhospho [S62(100)]	1.80045e-05	0	1	7	7	212549553	212549553 [55-81]	1	3603.62	S8(Phospho): 100	664.5	290.1	1112	709	322.4	819.4	618.3	920	1031.4	1081.6																664.5	Unique	5.96744	High	0	3.361e-06
High	[K].LNQSGTSVGTDEESDVTQEEER.[D]	1xTMT6plex [N-Term]; 1xPhospho [T10(100)]	530368768 1xPhospho [T2293(100)]	2.70955e-05	0	1	36	2	530368768	530368768 [2284-2305]	0	2719.18	T10(Phospho): 100	361.8	207.4	360.8	424.6	183.7	321.1	331.5	326.3	295.2	319																361.8	Unique	6.87243	High	0	6.929e-06
High	[K].EIPEDVDMEEEKESEDSDEENDFTEK.[V]	3xTMT6plex [N-Term; K12; K26]; 2xPhospho [S14(100); S17(100)]	29789283 2xPhospho [S779(100); S782(99.1)]	9.09637e-05	0	1	2	5	29789283	29789283 [766-791]	1	3964.66	S14(Phospho): 100; S17(Phospho): 100	889.6	533.2	700.9	943.5	504.1	990.6	795.2	1496.7	673.7	766.2																889.6	Unique	5.46202	High	0	5.808e-05
High	[K].NTADHDESPPRTPTGNAPSSESDIDISSPNVSHDESIAK.[D]	2xTMT6plex [N-Term; K39]; 2xPhospho [S/T]		0.000426192	0	1	2	8	5901962	5901962 [117-155]	1	4693.1	T12(Phospho): 49.6; T14(Phospho): 49.6; S19(Phospho): 33.23; S20(Phospho): 33.23; S22(Phospho): 33.23	147.1	161.6	177.9	163.3	140	198.9	133.3	165.7	187	127																147.1	Unique	3.79558	High	0	0.000431
High	[R].VQDLSAGGQGSLTDSGPERRPEGPGAQAPSSPR.[V]	1xTMT6plex [N-Term]; 1xPhospho [S31(99)]	1034556295 1xPhospho [S548(99)]	9.23512e-05	0	1	4	6	1034556295	1034556295 [518-550]	1	3570.71	S31(Phospho): 99.02	336.3	144.2	398.6	172.4	166	238.6	140.8	199.7	211.7	186.6																336.3	Unique	6.07056	High	0	5.963e-05
High	[R].GAEGTERSSDSEEAFETPESTTPVK.[A]	2xTMT6plex [N-Term; K25]; 1xPhospho [S/T]		0.000147799	0	1	3	5	530392793	530392793 [1872-1896]	1	3179.47	S8(Phospho): 49.89; S9(Phospho): 49.89	377.9	374.9	402.9	1478.2	286.2	545.1	258.1	288.3	389.4	414.3																377.9	Unique	6.31116	High	0	0.0001269
High	[R].TNSGISSASGGSTEPTTPDSERPAQALLR.[D]	1xTMT6plex [N-Term]; 1xPhospho [T17(99.4)]	530418210 1xPhospho [T746(99.4)]	4.14612e-06	0	1	10	6	530418210	530418210 [730-758]	0	3196.53	T17(Phospho): 99.41	260.1	314.8	367.1	289.3	412.3	343.8	274.3	217.6	249	395.8																260.1	Unique	6.85207	High	0	2.527e-07
High	[K].ESAAPASPAPSPAPSPTPAPPQK.[E]	2xTMT6plex [N-Term; K23]; 2xPhospho [S11(100); S15(99.5)]	78042577 2xPhospho [S544(100); S/T]	0.00042481	0	1	6	55	78042577	78042577 [538-560]	0	2771.35	S7(Phospho): 100; S15(Phospho): 100	946.2	1656.1	1629.7	1813.4	1243.6	1679.3	747.3	885.2	1806.8	1770.6	45.22	30.68	19.5	14.58	72.23	35.2	5.71	54.14	40.25	24.23							Unique	3.45473	High	0.0001849	0.0004796
High	[K].ESAAPASPAPSPAPSPTPAPPQK.[E]	2xTMT6plex [N-Term; K23]; 1xPhospho [S7(100)]	78042577 1xPhospho [S544(100)]	9.8755e-05	0	1	6	24	78042577	78042577 [538-560]	0	2691.38	S7(Phospho): 100	15.6	32.7	19.9	27	28.7	30.7	16.8	20.6	36.3	37.4																15.6	Unique	5.56988	High	0	0.0001617
High	[R].TAPAAPAEDAVAAAAAAPSEPSEPSRPSPQPKPR.[T]	2xTMT6plex [N-Term; K32]; 1xPhospho [S25(97.8)]	4507705 1xPhospho [S141(97.8)]	0.000113906	0	1	1	5	4507705	4507705 [117-150]	0	3830.95	S28(Phospho): 100	104.5	91.3	99.4	113.7	139	103.3	130.5	117.2	134.1	194.8																104.5	Unique	5.09743	High	0	8.425e-05
High	[R].KGGSYSQAASSDSAQGSDVSLTACK.[GV]	3xTMT6plex [N-Term; K1; K25]; 1xCarbamidomethyl [C24]; 2xPhospho [S17(99.3); S20(100)]	530429121 2xPhospho [S353(99.3); S356(100)]	8.37871e-05	0	1	2	1	530429121	530429121 [337-361]	1	3309.53	S17(Phospho): 99.32; S20(Phospho): 100																											No Quan Values	5.42877	High	0	5.039e-05
High	[R].YSNQNLEDLMPSRPPSPR.[E]	1xTMT6plex [N-Term]; 1xPhospho [S16(100)]	1034644180 1xPhospho [S4258(100)]	0.000390244	0	1	1	4	1034644180	1034644180 [4243-4260]	0	2410.14	S16(Phospho): 100	508.9	932.1	705.2	946.4	349.9	603.1	785.7	443.7	561.4	543.3																508.9	Unique	4.65457	High	0	0.0004133
High	[R].AAVGQESPGGLEAGNAK.[A]	2xTMT6plex [N-Term; K17]; 1xPhospho [S7(100)]	155030216 1xPhospho [S1305(100)]	0.000359055	0	1	1	1	155030216	155030216 [1299-1315]	0	2094.06	S7(Phospho): 100	218	167.8	504	198	242.1	188.3	444.5	235.8	225.2	314																218	Unique	5.02911	High	0	0.0003807
High	[R].KTSSDDESEEDEDDLLQR.[T]	2xTMT6plex [N-Term; K1]; 2xPhospho [S8(100); S/T]	118344456 2xPhospho [S206(99.5); S210(100)]	0.000392905	0	1	3	13	118344456	118344456 [203-220]	1	2729.15	S4(Phospho): 99.57; S8(Phospho): 100	1100.5	1331.8	1100.6	1351.2	1130.8	1670.1	1235.9	2512.9	1180	1289.8																1100.5	Unique	6.03035	High	0	0.0004086
High	[R].AASSDQLRDNSPPPAFKPEPPK.[A]	3xTMT6plex [N-Term; K17; K22]; 1xPhospho [S11(100)]	282165810 1xPhospho [S1017(100)]	0.000418614	0	1	5	3	282165810	282165810 [1007-1028]	1	3116.64	S11(Phospho): 100	245.5	289.1	368.2	551.6	266.3	293.2	447.2	299	334.1	344																245.5	Unique	4.01445	High	0	0.0004264
High	[K].AEVPGATGGDSPHLQPAEPPGEPR.[R]	1xTMT6plex [N-Term]; 1xPhospho [S11(100)]	33620747 1xPhospho [S17(100)]	0.00029115	0	1	9	1	33620747	33620747 [7-30]	0	2675.27	S11(Phospho): 100	203.4	208.8	221	265.9	250.8	261.9	160.6	440.1	282.8	207.4																203.4	Unique	4.06949	High	0	0.0003106
High	[R].EPLENSASESSDTELPEKER.[G]	2xTMT6plex [N-Term; K18]; 1xPhospho [S8(100)]	152963644 1xPhospho [S48(100)]	0.00031803	0	1	1	2	152963644	152963644 [41-60]	1	2785.32	S8(Phospho): 99.99	206.2	199.2	292.9	303.6	212.1	236.4	161.6	239.8	945.3	212.2																206.2	Unique	4.97679	High	0	0.0003776
High	[K].SSSSVTTSETQPCTPSSSDYSDLQR.[V]	1xTMT6plex [N-Term]; 1xCarbamidomethyl [C13]; 1xPhospho [T14(100)]	530417131 1xPhospho [T334(100)]; 4507869 1xPhospho [T335(100)]	1.1507e-05	0	2	4	1	530417131; 4507869	530417131 [321-345]; 4507869 [322-346]	0	3016.29	T14(Phospho): 100	199.6	116.5	146.6	129.7	545	182.4	131.5	229.8	170.2	149.5																199.6	Not Unique	6.92506	High	0	1.525e-06
High	[K].ESGQEGSTDNDDSSSEKELGETNK.[G]	3xTMT6plex [N-Term; K17; K24]; 2xPhospho [S13(99.3); S15(99.3)]	578836192 2xPhospho [S327(99.3); S329(99.3)]	0.000200591	0	1	2	4	578836192	578836192 [315-338]	1	3390.47	S13(Phospho): 66.67; S14(Phospho): 66.67; S15(Phospho): 66.67	233.2	131.1	154.3	222.7	191.7	233.3	154.6	209.7	175.6	147																233.2	Unique	5.43196	High	0	0.0001965
High	[K].EVEDKESEGEEEDEDEDLSK.[Y]	3xTMT6plex [N-Term; K5; K20]; 1xPhospho [S7(100)]	42741682 1xPhospho [S153(100)]	0.000293374	0	1	2	2	42741682	42741682 [147-166]	1	3107.39	S7(Phospho): 100	2446.5	297.4	2429.4	1533.7	562.3	546.4	1959	1273.6	693.1	962.7																2446.5	Unique	5.93773	High	0	0.0003131
High	[R].RDSGVGSGLEAQESWER.[L]	1xTMT6plex [N-Term]; 1xPhospho [S3(100)]	767922692 1xPhospho [S822(100)]	6.36641e-05	0	1	9	1	767922692	767922692 [820-836]	1	2171.99	S3(Phospho): 100	199.6	377	181.5	220.7	386.6	310.3	329	185.5	202.6	256.3																199.6	Unique	7.77897	High	0	3.12e-05
High	[R].RSSTSGDTEEEEEEEVVPFSSDEQKR.[SR]	2xTMT6plex [N-Term; K25]; 1xPhospho [S/T]		7.45031e-06	0	3	28	8	1034675225; 1034675223; 1034675227	1034675225 [151-176]; 1034675223 [151-176]; 1034675227 [151-176]	2	3524.6	S2(Phospho): 50; S3(Phospho): 50	277.6	236.9	537	294.9	281.3	225.2	677.2	274.1	325.3	276.6																277.6	Not Unique	7.22052	High	0	7.103e-07
High	[K].EYVSNDAAQSDDEEKLQSQPTDTDGGR.[L]	2xTMT6plex [N-Term; K15]; 1xPhospho [S10(100)]	45238858 1xPhospho [S403(100)]	2.66884e-05	0	1	5	2	45238858	45238858 [394-420]	1	3493.56	S10(Phospho): 100	2393.5	376.6	4361.9	4138.5	1060.6	1740.9	5428	2763.6	3149.2	881.4																2393.5	Unique	7.40373	High	0	6.738e-06
High	[K].ESEDKPEIEDVGSDEEEEK.[K]	3xTMT6plex [N-Term; K5; K19]; 1xPhospho [S13(100)]	153792590 1xPhospho [S385(100)]	0.000173683	0	1	3	4	153792590	153792590 [373-391]	0	2960.38	S13(Phospho): 100	1415.5	370.6	956	632	692.8	1761.3	738.1	1058.7	1301.4	799.9																1415.5	Unique	5.7873	High	0	0.0001608
High	[K].IEKEDDSEGEESEEEEEGEEEGSESESR.[S]	2xTMT6plex [N-Term; K3]; 2xPhospho [S7(100); S23(100)]	768003541 2xPhospho [S1602(100); S1618(100)]	0.000336019	0	1	11	2	768003541	768003541 [1596-1623]	1	3806.47	S7(Phospho): 100; S23(Phospho): 99.99	111.6	147.3	115.6	150.2	225.1	176.8	99.5	166.6	187	172.6																111.6	Unique	6.54816	High	0	0.0003586
High	[K].AGPLGGSSYEEEEEEEEGGGGGER.[K]	1xTMT6plex [N-Term]; 1xPhospho [S8(99.6)]	42560237 1xPhospho [S435(99.6)]	6.46352e-05	0	1	1	6	42560237	42560237 [428-451]	0	2720.1	S8(Phospho): 99.6	202.9	118.2	215.9	330.9	127	188.9	208.2	156.9	170.4	169.8																202.9	Unique	5.60932	High	0	3.207e-05
High	[K].VTSPSSSSSSSSSDSESDDEADVSEVTPR.[V]	1xTMT6plex [N-Term]; 1xPhospho [S/T]		6.42172e-05	0	1	2	4	768020849	768020849 [148-176]	0	3227.34	S12(Phospho): 49.78; S13(Phospho): 49.78																											No Quan Values	5.70679	High	0	3.17e-05
High	[R].QAHDLSPAAESSSTFSFSGR.[D]	1xTMT6plex [N-Term]; 1xPhospho [S6(100)]	1034569323 1xPhospho [S306(100)]	0.000252164	0	1	21	2	1034569323	1034569323 [301-320]	0	2391.08	S6(Phospho): 100	124.9	112.7	119	141.5	166.5	153	168.4	124.7	135.4	151.8																124.9	Unique	5.19275	High	0	0.0002634
High	[K].RPNEDSDEDEEKGAVVPPVHDIYR.[A]	2xTMT6plex [N-Term; K12]; 1xPhospho [S6(100)]	4557495 1xPhospho [S691(100)]	0.000108379	0	1	1	5	4557495	4557495 [686-709]	1	3304.59	S6(Phospho): 100	249.2	230	333.5	308.9	354.6	332	278.9	351.8	345.3	358.9																249.2	Unique	6.50271	High	0	7.788e-05
High	[R].QAPGVGAVGGGSPEREEVGAGYNSEDEYEAAAAR.[I]	1xTMT6plex [N-Term]; 1xPhospho [S12(100)]	530433144 1xPhospho [S165(100)]	8.03614e-06	0	1	4	2	530433144	530433144 [154-187]	1	3659.64	S12(Phospho): 100	74.3	54.8	113.4	88.9	120.8	69.5	55.4	169.7	87.9	61.6																74.3	Unique	6.59088	High	0	8.116e-07
High	[R].QAPSAPETGGAGASEAPAPTGGEDGAGAETTPVAEPTK.[L]	2xTMT6plex [N-Term; K38]; 1xPhospho [T31(97.5)]	1034662064 1xPhospho [T99(97.5)]	0.000130497	0	1	8	8	1034662064	1034662064 [69-106]	0	3972.88	T31(Phospho): 97.54																											No Quan Values	6.1703	High	0	0.0001046
High	[R].AAFTTPDHAPLSPQSSVASSGSEQTEEQGSSR.[N]	1xTMT6plex [N-Term]; 1xPhospho [S/T]	768009755 1xPhospho [S271(98.6)]	0.000111711	0	1	4	4	768009755	768009755 [260-291]	0	3555.61	S12(Phospho): 98.62	89.9	55.8	75.3	88.1	65.9	69.8	104.2	91.1	95.2	73.4																89.9	Unique	6.03904	High	0	8.164e-05
High	[K].KVLSDSEDEEKDADVPGTSTR.[K]	3xTMT6plex [N-Term; K1; K11]; 2xPhospho [S4(100); S6(100)]	34996489 2xPhospho [S1281(100); S1283(100)]	0.000398924	0	1	4	4	34996489	34996489 [1278-1298]	2	3125.49	S4(Phospho): 100; S6(Phospho): 100	1038.1	1000.3	1034.2	971.8	1111.5	1025.1	974.1	1990.8	1084.8	1843.8																1038.1	Unique	5.99315	High	0	0.0004129
High	[R].VVSDADDSDSDAVSDK.[S]	2xTMT6plex [N-Term; K16]; 1xPhospho [S10(100)]	530369278 1xPhospho [S427(100)]	0.000394906	0	1	7	6	530369278	530369278 [418-433]	0	2162.97	S10(Phospho): 99.68	943.5	1408.3	945.2	1448.5	1123	1313.9	791.2	1774.7	1585.2	840.4																943.5	Unique	5.46667	High	0	0.0004102
High	[K].SKEDVTVSPSQEINAPPDENK.[R]	3xTMT6plex [N-Term; K2; K21]; 1xPhospho [S8(100)]	1034649102 1xPhospho [S852(100)]	0.000348358	0	1	1	1	1034649102	1034649102 [845-865]	1	3051.55	S8(Phospho): 100	235	127.7	175	98.5	136.5	175	228.7	110.2	139.3	269																235	Unique	4.7724	High	0	0.0003706
High	[K].LTVENSPKQEAGISEGQGTAGEEEEK.[K]	3xTMT6plex [N-Term; K8; K26]; 1xPhospho [S6(100)]	27501446 1xPhospho [S73(100)]	6.97176e-05	0	1	1	6	27501446	27501446 [68-93]	1	3484.73	S6(Phospho): 100	882	670.9	1116.5	1340.8	720.2	834.3	2088.5	699	1355.9	948.6																882	Unique	6.49676	High	0	3.664e-05
High	[K].QIDSSPVGGETDETTVSQNYR.[G]	1xTMT6plex [N-Term]; 1xPhospho [S5(99.6)]	530426853 1xPhospho [S569(99.6)]	0.00033663	0	1	18	4	530426853	530426853 [565-585]	0	2592.17	S5(Phospho): 99.62	184	270	244.9	335	239.1	165.7	411.4	208.8	191.7	291.8																184	Unique	5.7664	High	0	0.0003594
High	[K].AESSNSSSSDDSSEEEEEKLK.[G]	3xTMT6plex [N-Term; K19; K21]; 1xPhospho [S]		3.94751e-05	0	1	4	21	530394600	530394600 [525-545]	1	3041.39	S3(Phospho): 50; S4(Phospho): 50	281.9	2257.9	392.1	1291.5	1346.4	910.7	420.6	1055.6	1357	402.4	36.93	23.58	5.84	32.26	24.21	35.59	21.86	33.96	36.15	39.29							Unique	5.84951	High	0	1.385e-05
High	[R].MAETVDTSEMVNGATEQRTSSKESSPIPSPTSDR.[K]	2xTMT6plex [N-Term; K22]; 2xOxidation [M1(100); M10(100)]; 2xPhospho [T/S]		0.000445021	0	1	2	1	112382250	112382250 [2141-2174]	2	4275.91	M1(Oxidation): 100; M10(Oxidation): 100; T15(Phospho): 49.41; T19(Phospho): 49.41; S20(Phospho): 49.41; S21(Phospho): 49.41	156.1	344.6	121.9	361.5	114	179.6	124.5	355.7	269.8	119.7																156.1	Unique	5.44302	High	0	0.0004419
High	[K].TVSSPPTSPRPGSAATVSASTSNIIPPR.[H]	1xTMT6plex [N-Term]; 1xPhospho [S/T]		0.000279128	0	1	2	11	109638749	109638749 [618-645]	0	3044.56	T7(Phospho): 49.87; S8(Phospho): 49.87	244.5	193.3	377.3	280.1	232.6	316.2	341	268	354.9	425.8																244.5	Unique	5.55394	High	0	0.0002966
High	[R].VTYTGDGSEHEGDTPELEAEPPR.[M]	1xTMT6plex [N-Term]; 1xPhospho [S8(100)]	767973160 1xPhospho [S191(100)]	0.000129099	0	1	6	1	767973160	767973160 [184-206]	0	2795.22	S8(Phospho): 100																											No Quan Values	5.83614	High	0	0.000103
High	[K].EGTGQQERESPRPLQLPGAEGPAISDGEEGGGEPGAGGGAAGAAGAGR.[R]	1xTMT6plex [N-Term]; 2xPhospho [S10(100); S25(100)]	530380464 2xPhospho [S75(100); S90(100)]	1.10676e-05	0	1	4	1	530380464	530380464 [66-113]	1	4802.16	S10(Phospho): 100; S25(Phospho): 100	48.2	44.1	37.8	54.3	30.9	60.8	106.2	45.8	64.6	72.2																48.2	Unique	6.18408	High	0	1.428e-06
High	[K].EGTGQQERESPRPLQLPGAEGPAISDGEEGGGEPGAGGGAAGAAGAGR.[R]	1xTMT6plex [N-Term]; 1xPhospho [T3(100)]	530380464 1xPhospho [T68(100)]	0.000105831	0	1	4	5	530380464	530380464 [66-113]	1	4722.2	T3(Phospho): 99.99	203.8	262.4	198	252.8	143.7	224	223.5	336.3	265.6	252.1																203.8	Unique	6.00972	High	0	0.0002318
High	[R].VIENADGSEEETDTR.[D]	1xTMT6plex [N-Term]; 1xPhospho [S8(100)]	92091586 1xPhospho [S1961(100)]	0.00029505	0	1	2	26	92091586	92091586 [1954-1968]	0	1973.85	S8(Phospho): 100	4190.6	17314.7	705	2217.3	6125	13987.7	2628	2548.7	10130.2		18.18	3.61	46.26	34.41	20.14	6.51	5.74	1.06	10.14								Unique	4.87554	High	0	0.000315
High	[R].VPGPAEGPAEPAAEASDEAER.[R]	1xTMT6plex [N-Term]; 1xPhospho [S16(100)]	1034574337 1xPhospho [S543(100)]	0.000348358	0	1	4	2	1034574337	1034574337 [528-548]	0	2359.07	S16(Phospho): 100	303.6	382.3	322.2	202.4	355.1	416.4	236.8	329	444.4	332.8																303.6	Unique	4.86112	High	0	0.0003706
High	[R].ATGGGLSSVGGGSSTIK.[Y]	2xTMT6plex [N-Term; K17]; 1xPhospho [S8(99.1)]	119703753 1xPhospho [S541(99.3)]	0.000203511	0	1	1	26	119703753	119703753 [534-550]	0	1974.03	S13(Phospho): 100	292.5	349	350.4	796.1	578.8	722.2	3657	388.2	571.4	495.4	57.3	57.01	62.59	56.64	59.91	55.51	58.86	59.53	54.98	36.92						146.6	Unique	4.70145	High	0	0.0002006
High	[K].ESEDDLNKESEEEVGPTK.[E]	3xTMT6plex [N-Term; K8; K18]; 1xPhospho [S10(100)]	253970456 1xPhospho [S529(100)]	0.000398253	0	1	1	1	253970456	253970456 [520-537]	1	2802.35	S10(Phospho): 100	1143.5	400.2	1309.2	1116.2	743.4	1218.1	947.5	1537	1454.7	755																1143.5	Unique	4.90106	High	0	0.0004127
High	[K].GYSSPEPDIQDSSGSEAQSVKPSTR.[R]	2xTMT6plex [N-Term; K21]; 1xPhospho [S13(99.4)]	1034577824 1xPhospho [S831(99.4)]	4.87624e-06	0	1	7	4	1034577824	1034577824 [819-843]	0	3147.49	S13(Phospho): 99.38	1897.4	1533.4	841.5	2115.5	870.5	1261.5	1276.5	1391	1822.1	484.6																1897.4	Unique	7.66063	High	0	3.363e-07
High	[R].DGTAPPPQSPGSPGTGQDEEWSDEESPRK.[A]	2xTMT6plex [N-Term; K29]; 1xPhospho [S22(100)]	296923763 1xPhospho [S354(100)]	6.86701e-05	0	1	1	2	296923763	296923763 [333-361]	1	3576.62	S22(Phospho): 100	1532.3	1394.5	1298.1	2810.1	674.3	1606.5	1374.5	1293.3	1667.7	1315.7																1532.3	Unique	7.02311	High	0	3.575e-05
High	[R].SNSAPLIHGLSDTSPVFQAEAPSAR.[R]	1xTMT6plex [N-Term]; 1xPhospho [S3(100)]	961513286 1xPhospho [S79(100)]	5.04031e-05	0	1	1	4	961513286	961513286 [77-101]	0	2861.4	S3(Phospho): 100	62.3	104.7	52.2	77.9	57.1	68.5	53.8	57.3	97.6	63.2	61.2	56.4	18.08	44.63	39.63	50.71	18.94	42.79	59.15	39.02							Unique	6.54005	High	0	2.072e-05
High	[K].VPDEEENEESDNEKETEK.[S]	3xTMT6plex [N-Term; K14; K18]; 1xPhospho [S10(100)]	19913406 1xPhospho [S1106(100)]	0.000388254	0	1	3	7	19913406	19913406 [1097-1114]	1	2917.34	S10(Phospho): 100	1872.3	1312.3	1309.5	1151.5	2365.3	1142.7	869.4	1658.7	2310	1267.4																1872.3	Unique	5.00539	High	0	0.0004049
High	[R].QVAGDAPVEQATAETASPVHR.[E]	1xTMT6plex [N-Term]; 1xPhospho [S17(100)]	578811835 1xPhospho [S1375(100)]	5.22907e-05	0	1	3	1	578811835	578811835 [1359-1379]	0	2443.18	S17(Phospho): 100	65.7	103.9	87.8	95.1	77.1	60.8	80.2	81.3	97.3	107.7																65.7	Unique	6.16098	High	0	2.213e-05
High	[R].EYGSQEGKHDYDDSSEEQSAEDSYEASPGSETQR.[R]	2xTMT6plex [N-Term; K8]; 2xPhospho [S14(99.3); S27(100)]	325120986 2xPhospho [S125(99.3); S138(100)]	0.000121796	0	1	4	4	325120986	325120986 [112-145]	1	4415.77	S14(Phospho): 99.3; S27(Phospho): 100	42.6	37.4	140.9	91.3	44.4	41.9	66.9	122.3	131.5	59																42.6	Unique	5.39862	High	0	9.381e-05
High	[R].EYGSQEGKHDYDDSSEEQSAEDSYEASPGSETQR.[R]	2xTMT6plex [N-Term; K8]; 1xPhospho [S/Y/T]		1.39192e-05	0	1	4	3	325120986	325120986 [112-145]	1	4335.8	S14(Phospho): 50; S15(Phospho): 50	36.9	31	108.8	65.2	36.2	32.9	62.4	103.8	111.5	35.7																36.9	Unique	6.78975	High	0	2.541e-06
High	[K].ASASGSGAQVGGPISSGSSASSVTVTR.[S]	1xTMT6plex [N-Term]; 1xPhospho [S16(99.6)]	27436946 1xPhospho [S613(99.6)]	4.70021e-06	0	1	5	5	27436946	27436946 [598-624]	0	2674.29	S16(Phospho): 99.56	92.7	87.8	130.6	80.4	67.2	66.8	58	87.3	126.8	127	8.92		35.54	5.58	24.99		23.49	20.43	20.13	49.64							Unique	6.04273	High	0	3.38e-07
High	[K].KDSNELSDSAGEEDSADLKR.[A]	3xTMT6plex [N-Term; K1; K19]; 1xPhospho [S9(100)]	768023947 1xPhospho [S784(100)]	0.000253163	0	1	5	2	768023947	768023947 [776-795]	2	2933.43	S9(Phospho): 100	198.2	350.6	267.3	253.6	158.7	217.2	148.6	401.9	358.8	269.6																198.2	Unique	5.10479	High	0	0.0002649
High	[K].SSLVNESETNQNSSSDSEAER.[R]	1xTMT6plex [N-Term]; 1xPhospho [T/S]	530394185 1xPhospho [S60(99.7)]	0.000224047	0	1	51	7	530394185	530394185 [46-66]	0	2579.09	S15(Phospho): 99.66	125.8	201.6	170.5	150.7	262.3	135.9	135.3	139	179.2	129.9																125.8	Unique	5.11629	High	0	0.0002277
High	[R].GGQGDPAVPAQQPADPSTPER.[Q]	1xTMT6plex [N-Term]; 1xPhospho [T/S]	1034675225 1xPhospho [T479(99.5)]; 1034675223 1xPhospho [T480(99.5)]; 1034675227 1xPhospho [T452(99.5)]	0.000386931	0	3	29	23	1034675225; 1034675223; 1034675227	1034675225 [462-482]; 1034675223 [463-483]; 1034675227 [435-455]	0	2384.11	T18(Phospho): 99.62	592.9	1561.8	1168.8	2113.9	632.2	865.7	4106.4	713.9	1718.7	1077.4	32.79	57	42.57	67.59	19.35	50.54	66		58.37							455.4	Not Unique	4.23595	High	9.533e-05	0.0004576
High	[R].QSLSSADNLESDAQGHQVAAR.[F]	1xTMT6plex [N-Term]; 1xPhospho [S5(99.6)]	150417986 1xPhospho [S349(99.6)]	0.00032515	0	1	2	2	150417986	150417986 [345-365]	0	2493.16	S5(Phospho): 99.64	98.8	204.5	165.6	151.7	197.9	205.4	146.3	138.4	173.8	221.8																98.8	Unique	4.99305	High	0	0.0003479
High	[R].VGVEASEETPQTSSSSARPGTPSDHQSQEASQFER.[K]	1xTMT6plex [N-Term]; 1xPhospho [T/S]		1.86788e-05	0	1	2	6	42476299	42476299 [362-396]	0	4012.8	T12(Phospho): 49.51; T21(Phospho): 49.51	80.9	70.5	65.1	49	79.1	83.5	66.9	61.6	63.3	71.1																80.9	Unique	6.25603	High	0	3.594e-06
High	[K].GESAEDKEHEEGRDSEEGPR.[C]	2xTMT6plex [N-Term; K7]; 1xPhospho [S15(100)]	768004469 1xPhospho [S649(100)]	0.0003616	0	1	5	5	768004469	768004469 [635-654]	2	2781.24	S15(Phospho): 100	588.3	731.2	475.9	783.5	644.7	788	517.4	648.7	1475.1	444.8	28.16	26.6	20.8	20.9	29.65	21.95	19.78	18.5	21	23.38							Unique	4.93913	High	0	0.0003827
High	[R].KDEETEESEYDSEHENSEPVTNIR.[N]	2xTMT6plex [N-Term; K1]; 2xPhospho [S12(99.5); Y/T/S]	134142826 2xPhospho [S537(99.5); Y/T/S]	0.000306969	0	1	35	3	134142826	134142826 [526-549]	1	3484.47	S12(Phospho): 99.48; S17(Phospho): 100	238.8	206.9	320.8	267.1	373.1	230.8	169.4	339.3	267.7	200.1																238.8	Unique	4.09115	High	0	0.0003284
High	[R].KDEETEESEYDSEHENSEPVTNIR.[N]	2xTMT6plex [N-Term; K1]; 1xPhospho [S12(100)]	134142826 1xPhospho [S537(100)]	3.99043e-05	0	1	35	1	134142826	134142826 [526-549]	1	3404.51	S12(Phospho): 100	89.9	172.1	177.6	171.9	250.6	213.8	107.5	210.3	149.2	136.3																89.9	Unique	5.84334	High	0	1.372e-05
High	[R].KGAGDGSDEEVDGKADGAEAKPAE.[-]	4xTMT6plex [N-Term; K1; K14; K21]; 1xPhospho [S7(100)]	1034629002 1xPhospho [S1943(100)]	0.000206042	0	1	1	3	1034629002	1034629002 [1937-1960]	2	3299.65	S7(Phospho): 100	590.7	498.4	508.3	508.1	536.1	821.9	1285.3	505.1	802.6	808.7																590.7	Unique	6.20622	High	0	0.000204
High	[K].LVEDERSDREETESSEGEEAAAGGGAK.[S]	2xTMT6plex [N-Term; K27]; 3xPhospho [S7(100); T12(99.6); S]	767909065 3xPhospho [S361(100); T366(99.6); S]	0.0001715	0	1	2	6	767909065	767909065 [355-381]	2	3506.47	S7(Phospho): 100; T12(Phospho): 99.56; S14(Phospho): 50.22; S15(Phospho): 50.22	768.5	567.7	445.5	824.5	784.6	597.9	559	1182.8	992.7	442.7																768.5	Unique	6.17286	High	0	0.0001582
High	[K].LVEDERSDREETESSEGEEAAAGGGAK.[S]	2xTMT6plex [N-Term; K27]; 2xPhospho [S7(100); T/S]	767909065 2xPhospho [S361(100); S/T]	0.000291705	0	1	2	10	767909065	767909065 [355-381]	2	3426.5	S7(Phospho): 100; S14(Phospho): 50; S15(Phospho): 50	1217.3	579.9	433.8	632.2	1683	531.5	566.7	1687.9	607.5	757.8																1217.3	Unique	5.76529	High	0	0.0003111
High	[K].LVEDERSDREETESSEGEEAAAGGGAK.[S]	2xTMT6plex [N-Term; K27]; 1xPhospho [S7(100)]	767909065 1xPhospho [S361(100)]	0.000408375	0	1	2	1	767909065	767909065 [355-381]	2	3346.53	S7(Phospho): 100	187.8	88.2	73.6	67.6	474.4	66.4	82.9	321.4	78.3	66.3																187.8	Unique	4.39705	High	0	0.0004198
High	[K].EQSAAMSQEAASPATVQSR.[Q]	1xTMT6plex [N-Term]; 1xPhospho [S12(100)]	27894339 1xPhospho [S276(100)]	0.00029561	0	1	2	1	27894339	27894339 [265-283]	0	2258.03	S12(Phospho): 100	122	144.9	154.3	124.6	177.2	151.7	178.1	143.3	149.7	162.5																122	Unique	4.89576	High	0	0.0003154
High	[K].GSSEQAESDNMDVPPEDDSKEGAGEQK.[T]	3xTMT6plex [N-Term; K20; K27]; 1xOxidation [M11(100)]; 1xPhospho [S8(100)]	212549553 1xPhospho [S62(98.4)]	8.25282e-05	0	1	7	8	212549553	212549553 [55-81]	1	3619.62	S8(Phospho): 100; M11(Oxidation): 100	752.4	598.5	734.7	826.9	579.2	768.8	581.8	1008.9	1076.3	1363.8																752.4	Unique	5.57736	High	0	4.907e-05
High	[R].KGGSYTQAASSDSAQGSDVSLTACK.[V]	3xTMT6plex [N-Term; K1; K25]; 1xCarbamidomethyl [C24]; 2xPhospho [S17(99.4); S20(99.4)]	24797067 2xPhospho [S356(99.4); S359(99.4)]	5.09178e-06	0	1	2	1	24797067	24797067 [340-364]	1	3323.55	S17(Phospho): 99.35; S20(Phospho): 99.35	124.9	86.3	198.3	111.3	1275	145.5	206.2	129	244.4	114.4																124.9	Unique	7.46297	High	0	3.622e-07
High	[K].EKLQEEGGGSDEEETGSPSEDGMQSAR.[T]	2xTMT6plex [N-Term; K2]; 2xPhospho [S10(100); S17(100)]	5902034 2xPhospho [S50(100); S57(100)]	1.24926e-05	0	1	1	2	5902034	5902034 [41-67]	1	3457.44	S10(Phospho): 100; S17(Phospho): 100	495.6	150.6	384.7	514.1	214.1	334.1	439.2	371.2	312.6	742																495.6	Unique	6.76381	High	0	2.311e-06
High	[R].KAVPMAPAPASPGSSNDSSAR.[S]	2xTMT6plex [N-Term; K1]; 1xPhospho [S11(100)]	1034608385 1xPhospho [S759(100)]	0.000112438	0	1	4	1	1034608385	1034608385 [749-769]	1	2536.26	S11(Phospho): 100																											No Quan Values	4.86985	High	0	8.247e-05
High	[K].AEGAATEEEGTPKESEPQAAAEPAEAK.[E]	3xTMT6plex [N-Term; K13; K27]; 1xPhospho [T/S]		0.000158237	0	1	1	2	30795231	30795231 [26-52]	1	3465.69	T6(Phospho): 49.82; T11(Phospho): 49.82	94.1	139.7	79	160.4	93.3	147.7	106.2	148.1	107.7	167.8																94.1	Unique	5.26219	High	0	0.0001403
High	[K].QAEVANQETKEDLPAENGETKTEESPASDEAGEK.[E]	4xTMT6plex [N-Term; K10; K21; K34]; 2xPhospho [S25(99.4); S28(100)]	48255933 2xPhospho [S86(99.4); S89(100)]	0.000297859	0	1	1	2	48255933	48255933 [62-95]	2	4708.22	S25(Phospho): 99.45; S28(Phospho): 100	322.1	84.4	284.1	227.7	141.8	189.6	168.1	1451.7	332.3	284.4																322.1	Unique	4.51136	High	0	0.0003182
High	[K].QAEVANQETKEDLPAENGETKTEESPASDEAGEK.[E]	4xTMT6plex [N-Term; K10; K21; K34]; 1xPhospho [S/T]		7.27993e-05	0	1	1	8	48255933	48255933 [62-95]	2	4628.25	S25(Phospho): 50; S28(Phospho): 50	1728.1	839.7	3863.6	2474.6	722.2	1333.2	1747.3	6801.6	3182.1	1464.4																1728.1	Unique	6.58093	High	0	0.0001365
High	[R].HKSDNETNLQQQVVWGNR.[N]	2xTMT6plex [N-Term; K2]; 1xPhospho [S3(100)]	530405305 1xPhospho [S1059(100)]	0.000266949	0	1	8	2	530405305	530405305 [1057-1074]	1	2691.34	S3(Phospho): 100	155.6	197.3	228.1	100.7	344.6	120.1	161.8	112.9	103.8	300.2																155.6	Unique	6.36839	High	0	0.0002819
High	[K].GSTISAFDGGSDSSSESEPEEPQSR.[K]	1xTMT6plex [N-Term]; 1xPhospho [S17(100)]		0.000164748	0	1	3	6	21704261	21704261 [128-152]	0	2852.19	S17(Phospho): 100	182.3	158.4	263.7	340.6	172.4	316.2	531.6	186.8	312.4	162.8		14.28	17.39	27.66	22.42		31.3	61.51	19.55	12.37							Unique	4.21775	High	0	0.0001492
High	[K].ESSEPPAPASSPEAASPTEQGPAGTSK.[K]	2xTMT6plex [N-Term; K27]; 1xPhospho [S/T]		8.58042e-05	0	1	5	35	578811835	578811835 [1125-1151]	0	3105.47	S10(Phospho): 50; S11(Phospho): 50	1004	1355.7	753.7	1230.7	1103.6	1028.2	696.5	1006.8	1384.2	772.4																1004	Unique	5.56298	High	0	5.263e-05
High	[K].VVAPPSSSDSSSDSSSDSDSSTDDSEEER.[A]	1xTMT6plex [N-Term]; 1xPhospho [S25(100)]	768001660 1xPhospho [S503(98.9)]	7.40697e-05	0	1	3	4	768001660	768001660 [479-507]	0	3257.28	S25(Phospho): 100	46.8	171.6	18.8	63	52.4	45.6	31.3	42.8	49.5	31.8																46.8	Unique	6.0739	High	0	4.07e-05
High	[K].SDAEEDGGTVSQEEEDR.[K]	1xTMT6plex [N-Term]; 1xPhospho [S11(100)]	767938662 1xPhospho [S618(99.7)]	0.000259222	0	1	2	5	767938662	767938662 [608-624]	0	2161.86	S11(Phospho): 99.68	1177.6	393.8	1160.8	947.8	164.2	2384.6	687.6	908	806	817.4	23.89	10.03	15.21	23.75		19.11	23.25	43.55	29.77	35.31							Unique	4.50014	High	0	0.0002723
High	[R].RGPNYTSGYGTNSELSNPSETESER.[K]	1xTMT6plex [N-Term]; 2xPhospho [Y/T/S]	767927731 2xPhospho [S435(100); S/T/Y]	3.21923e-06	0	1	12	1	767927731	767927731 [420-444]	1	3121.3	S16(Phospho): 100; S19(Phospho): 49.83; T21(Phospho): 49.83	290.4	126.1	110.5	72.9	181.7	69.8	83.4	99.6	188.3	94.7																290.4	Unique	7.39222	High	0	1.613e-07
High	[K].ALTSADGASEEQSQNDEDNQGSEK.[L]	2xTMT6plex [N-Term; K24]; 1xPhospho [S13(99.5)]	557948093 1xPhospho [S315(99.5)]	9.07672e-05	0	1	3	1	557948093	557948093 [303-326]	0	3048.33	S13(Phospho): 99.51	76.6	77.7	73.3	106.7	87.6	97.4	97.2	97.4	66.4	113.6																76.6	Unique	4.97157	High	0	5.773e-05
High	[R].QQAGAQGPGSADLEDGEMGK.[R]	2xTMT6plex [N-Term; K20]; 1xOxidation [M18(100)]; 1xPhospho [S10(100)]	110556636 1xPhospho [S1073(100)]	0.000364795	0	1	2	1	110556636	110556636 [1064-1083]	0	2500.14	S10(Phospho): 100; M18(Oxidation): 100																											No Quan Values	4.23599	High	0	0.0003856
High	[R].TVNSGGSSEPSPTEVDVSR.[Q]	1xTMT6plex [N-Term]; 1xPhospho [S11(100)]	530380688 1xPhospho [S740(100)]	9.9183e-05	0	1	7	2	530380688	530380688 [730-748]	0	2214.01	S11(Phospho): 100	264.4	412.6	393.2	331.3	361.4	442.4	267.3	457.7	408.3	405.3																264.4	Unique	5.59696	High	0	8.391e-05
High	[K].SPSEESAPTTSPESVSGSVPSSGSSGR.[E]	1xTMT6plex [N-Term]; 1xPhospho [S11(99.4)]	4826964 1xPhospho [S133(99.4)]	0.000183429	0	1	3	2	4826964	4826964 [123-149]	0	2859.27	S11(Phospho): 99.45	121.5	56	82.4	69.1	69.9	94.9	72.2	72.5	111	89.9																121.5	Unique	4.68153	High	0	0.0001736
High	[R].REESPMDVDQPSPSAQDTQSIASDGTPQGEK.[E]	2xTMT6plex [N-Term; K31]; 1xOxidation [M6(100)]; 1xPhospho [S12(100)]	1034673276 1xPhospho [S3943(100)]	0.000320392	0	1	13	14	1034673276	1034673276 [3932-3962]	1	3841.75	M6(Oxidation): 100; S12(Phospho): 99.99	454	232.9	693.2	248	649.6	548.2	360	465	637.1	433.4																454	Unique	5.55261	High	0	0.0003428
High	[R].REESPMDVDQPSPSAQDTQSIASDGTPQGEK.[E]	2xTMT6plex [N-Term; K31]; 1xPhospho [S12(100)]	1034673276 1xPhospho [S3943(100)]	1.05306e-05	0	1	13	5	1034673276	1034673276 [3932-3962]	1	3825.75	S12(Phospho): 100	717.9	446.9	987	326	1086.8	834	591.3	740	762.9	659.7																717.9	Unique	6.28371	High	0	8.896e-05
High	[R].SEGEGEAASADDGSLNTSGAGPK.[S]	2xTMT6plex [N-Term; K23]; 1xPhospho [S/T]	571026606 1xPhospho [S62(100)]	0.000105147	0	1	2	7	571026606	571026606 [49-71]	0	2645.2	S14(Phospho): 100	396.8	388.7	339.2	399.7	339.4	368.6	271.3	367.9	452.9	362.9																396.8	Unique	4.67429	High	0	7.402e-05
High	[R].AKPVVSDDDSEEEQEEDRSGSGSEED.[-]	2xTMT6plex [N-Term; K2]; 1xPhospho [S]		1.08308e-05	0	1	11	3	768003541	768003541 [1654-1679]	1	3363.43	S19(Phospho): 33.33; S21(Phospho): 33.33; S23(Phospho): 33.33	55.8	44.3	98.8	185.5	101.4	97.7	79.2	110.6	217.1	64.2																	Unique	5.91821	High	0	1.47e-06
High	[R].SVENLPECGITHEQR.[A]	1xTMT6plex [N-Term]; 1xCarbamidomethyl [C8]; 1xPhospho [S1(100)]	767909551 1xPhospho [S425(100)]	0.00030239	0	1	9	1	767909551	767909551 [425-439]	0	2077.96	S1(Phospho): 100	101.7	126.8	152.3	88.4	202.1	167.8	111.2	111.4	176.4	174.5																101.7	Unique	5.076	High	0	0.0003232
High	[K].QENSSNSSPAPEPNSAVPSDGTEAK.[V]	2xTMT6plex [N-Term; K25]; 1xPhospho [S/T]		0.000365436	0	1	2	5	10337613	10337613 [107-131]	0	3038.4	S7(Phospho): 50; S8(Phospho): 50	184.4	284.6	169.3	231.6	214.1	284.8	170.6	298.4	234.8	372.7																184.4	Unique	4.66047	High	0	0.0003861
High	[K].DKDQPPSPSPPPQSEALSSTSR.[L]	2xTMT6plex [N-Term; K2]; 1xPhospho [S9(100)]	7662354 1xPhospho [S61(100)]	7.0781e-05	0	1	1	1	7662354	7662354 [53-74]	1	2846.4	S9(Phospho): 100	175	158.3	142.9	138.4	146.2	179.9	122.3	190.9	199.5	190.6																175	Unique	5.31372	High	0	3.769e-05
High	[R].KADGEDAGAESNEEAPGEPSAGSSEEAPGEPSAGSSEEAPGER.[S]	2xTMT6plex [N-Term; K1]; 1xPhospho [S11(100)]	154759257 1xPhospho [S103(100)]	1.92821e-06	0	1	2	12	154759257	154759257 [93-135]	1	4667.01	S11(Phospho): 100	181.1	128.7	155.7	165.2	98.3	170	137.3	223.7	206.5	150.9																181.1	Unique	7.54983	High	0	1.178e-06
High	[K].SGGSGHAVAEPASPEQELDQNK.[G]	2xTMT6plex [N-Term; K22]; 1xPhospho [S13(100)]	103472005 1xPhospho [S308(100)]	0.000107678	0	1	1	2	103472005	103472005 [296-317]	0	2746.31	S13(Phospho): 100	134.8	118	128.7	216.1	180.2	494.5	143.3	418.9	282.8	247.3																134.8	Unique	5.52733	High	0	7.704e-05
High	[R].GGGAGGNSDSDNLDSTDCNSESSSGGK.[S]	2xTMT6plex [N-Term; K27]; 1xCarbamidomethyl [C18]; 1xPhospho [S8(100)]	37620163 1xPhospho [S1591(100)]	0.00010492	0	1	2	2	37620163	37620163 [1584-1610]	0	3070.26	S8(Phospho): 100	86.1	62.2	125.6	147.6	199.4	81	75.4	69.2	124.3	58.2																86.1	Unique	5.34145	High	0	0.0001302
High	[R].SNVSSPATPTASSSSSTTPTR.[K]	1xTMT6plex [N-Term]; 1xPhospho [T8(100)]	213972636 1xPhospho [T1643(100)]	0.000396243	0	1	6	9	213972636	213972636 [1636-1656]	0	2332.09	T18(Phospho): 98.27	108.3	121.4	168.3	119.7	202.7	102.8	119.4	125.4	158.1	199.9	48.24	111.8	61.83	103.65	96.08	94.99	83.23	74.52	89.25	53.84		71.3				145.2	Unique	4.51943	High	0	0.0004112
High	[R].VQEHEDSGDSEVENEAK.[G]	2xTMT6plex [N-Term; K17]; 2xPhospho [S7(100); S10(100)]	118344456 2xPhospho [S121(100); S124(100)]	6.73464e-05	0	1	3	24	118344456	118344456 [115-131]	0	2520.06	S7(Phospho): 100; S10(Phospho): 100	1335.4	966.2	1187	1481.6	1159.4	2104.5	1202.1	2625.9	1769.1	1629.3	27.17	24.52	35.02	32.01	28.81	36.12	23.43	28.09	30.3	31.23				1592	1078.9		Unique	6.00064	High	0	3.456e-05
High	[K].SNDSTEQNLSDGTPMPDSYPTTPSSTDAATSESK.[E]	2xTMT6plex [N-Term; K34]; 1xPhospho [S10(99.5)]	1034673276 1xPhospho [S2862(99.5)]	7.97214e-05	0	1	13	10	1034673276	1034673276 [2853-2886]	0	4056.78	S10(Phospho): 99.5	131.9	69.4	115.3	79.2	74.4	123.8	73.2	116.9	138.8	205.5																131.9	Unique	4.6596	High	0	0.000152
High	[K].SSQSSTLSHSNR.[G]	1xTMT6plex [N-Term]; 1xPhospho [S10(100)]	53729346 1xPhospho [S65(100)]	0.000280746	0	1	2	15	53729346	53729346 [56-67]	0	1599.73	S10(Phospho): 100	1245.8	1042.6	1569.1	510.8	428.4	931.1	1624.1	306.4	241.5	313.7	83.55	98.69	99.62	43.14	15.69	99.5	98.7	56.31	36.49	44.49	1008.5						Unique	5.59176	High	0	0.000298
High	[R].QASTDAGTAGALTPQHVR.[A]	1xTMT6plex [N-Term]; 1xPhospho [S3(99.8)]	530397737 1xPhospho [S109(99.8)]	4.25791e-05	0	1	12	34	530397737	530397737 [107-124]	0	2090.02	S3(Phospho): 99.77	179.9	327.2	273.3	293.3	414.5	528.2	271	1249.3	411.1	577.9	24.02	75.7	69.43	53.75	66.92	77.85	66.26	86.35	80.12	73.98		149.4	210.5				Unique	6.86131	High	0	2.568e-05
High	[R].EEDEPEERSGDETPGSEVPGDK.[A]	2xTMT6plex [N-Term; K22]; 1xPhospho [S9(100)]	118601081 1xPhospho [S161(100)]	5.70156e-05	0	1	1	39	118601081	118601081 [153-174]	1	2926.29	S9(Phospho): 100	9982.7	10020.3	9987.5	11410	13569.6	22493.7	4780.4	25406.7	35584.5	14947.3	8.37	2.82	12.52	10.19	2.17	0.31	5.12	0.28	1.72	6.24							Unique	5.85354	High	0	0.0001099
High	[K].GIQLYDTPYEPEGQSVDSDSESTVSPR.[L]	1xTMT6plex [N-Term]; 1xPhospho [S18(99.5)]	106879210 1xPhospho [S310(99.5)]	0.000206466	0	1	1	2	106879210	106879210 [293-319]	0	3265.46	S18(Phospho): 99.48	73.8	38.1	58.2	41.3	44.7	56.8	81.7	51.6	62.8	56.2																73.8	Unique	5.36433	High	0	0.0002044
High	[R].YQDEVFGGFVTEPQEESEEEVEEPEER.[Q]	1xTMT6plex [N-Term]; 1xPhospho [S17(100)]	1034643208 1xPhospho [S149(100)]	0.000117913	0	1	1	3	1034643208	1034643208 [133-159]	0	3525.49	S17(Phospho): 100	915.8	414.4	662.3	253.3	718	5541.6	3028.3	166.1	392.4	489	123.67	114.5	121.04	101.5	127.9	157.9	150.52	69.82	110.85	115.57	1716.7					114.9	Unique	4.28311	High	0	8.927e-05
High	[K].AAPEASSPPASPLQHLLPGK.[A]	2xTMT6plex [N-Term; K20]; 2xPhospho [S11(99.7); S]	767958073 2xPhospho [S726(100); S]	0.000178873	0	1	4	136	767958073	767958073 [716-735]	0	2586.31	S6(Phospho): 50; S7(Phospho): 50; S11(Phospho): 100	3046.8	5217.6	4827.1	2348	3313.4	3954	3690	1540.7	2458.9	2759.3	125.65	136.59	139.91	137.86	174.37	134.73	134.9	118.26	138.22	124.1	3261.7			7501.6	12168.8	278.1	Unique	5.84797	High	0.0002194	0.0004893
High	[R].EEDSQSSSEESDSEEEAPAQAKPSGK.[A]	3xTMT6plex [N-Term; K22; K26]; 2xPhospho [S13(100); S]	530380671 2xPhospho [S419(100); S]; 207113162 2xPhospho [S419(100); S]; 530380673 2xPhospho [S419(100); S]	0.000407697	0	3	19	3	530380671; 207113162; 530380673	530380671 [407-432]; 207113162 [407-432]; 530380673 [407-432]	0	3585.56	S6(Phospho): 49.86; S7(Phospho): 49.86; S13(Phospho): 100		399.5	502.5	1418	408.4	233.6	393	1189.3	1161.2	378.5		32.46	0.47	15.44	13.83	59.03	16.58	13.33	2.17	63.86							Not Unique	4.1112	High	0.0002194	0.0004838
High	[R].AYLGYQAVPSGSSGSLSTSSSSSPPGTPSPADAK.[A]	2xTMT6plex [N-Term; K34]; 1xPhospho [T27(93.5)]		0.000261266	0	1	3	30	28872796	28872796 [209-242]	0	3736.8	S10(Phospho): 9.09; S12(Phospho): 9.09; S13(Phospho): 9.09; S15(Phospho): 9.09; S17(Phospho): 9.09; T18(Phospho): 9.09; S19(Phospho): 9.09; S20(Phospho): 9.09; S21(Phospho): 9.09; S22(Phospho): 9.09; S23(Phospho): 9.09																											No Quan Values	3.50616	High	0	0.0002745
High	[R].YESQEPLAGQESPLPLATR.[E]	1xTMT6plex [N-Term]; 1xPhospho [S12(100)]	110556636 1xPhospho [S601(100)]	9.03163e-06	0	1	2	16	110556636	110556636 [590-608]	0	2395.17	S12(Phospho): 100	885.9	1115	1300.1	605.9	413.5	938.7	971.5	626.9	707.7	904.3	70.25	54.33	60.9	93.93	62.84	101.43	61.8	90.83	97.92	94.66		445.9	1326				Unique	7.03309	High	0	1.973e-06
High	[R].SSPNVANQPPSPGGK.[S]	2xTMT6plex [N-Term; K15]; 1xPhospho [S11(100)]	1034650321 1xPhospho [S1190(100)]	0.000420675	0	1	18	7	1034650321	1034650321 [1180-1194]	0	1975.01	S11(Phospho): 100	450.3	614.7	1643.6	857.5	753.6	522.1	659.4	539	503.3	566.6	84.17	37.1	52.72	51.61	42.4	67.37	28.25	35.27	67.07	52.82							Unique	4.82824	High	0	0.0004348
High	[R].VVVISSSEDSDAENSSSR.[E]	1xTMT6plex [N-Term]; 1xPhospho [S]		0.000126074	0	1	3	161	15451779	15451779 [508-525]	0	2176.98	S15(Phospho): 99.7	855.9	1776	1006.9	1356.2	2149.3	2351.3	1184	1610.8	1684.8	963.2	119.02	164.53	126.73	138.83	128.79	130.03	127.29	154.75	141.84	126.95				139.8	91.7	126.7	Unique	5.47702	High	0	0.0002073
High	[K].RKSEDGTPAEDGTPAATGGSQPPSMGR.[K]	2xTMT6plex [N-Term; K2]; 1xPhospho [S3(100)]	157694494 1xPhospho [S1186(100)]	0.000339692	0	1	3	1	157694494	157694494 [1184-1210]	2	3195.51	S3(Phospho): 100	97.9	156.3	138.1	100.2	146.7	116.3	121.3	108.1	148.9	115.2																97.9	Unique	5.18507	High	0	0.0003619
High	[K].GGDDHDDTSDSDSDGLTLK.[E]	2xTMT6plex [N-Term; K19]; 2xPhospho [T8(99.5); S/T]	768015660 2xPhospho [T151(99.5); S/T]	0.000221784	0	1	4	10	768015660	768015660 [144-162]	0	2568.04	T8(Phospho): 99.53; S11(Phospho): 100	746.8	846.1	764.5	826.4	1132	822.2	716	1111.5	759.8	769.9																746.8	Unique	5.23267	High	0	0.0002247
High	[K].MESEGGADDSAEEGDLLDDDDNEDR.[G]	1xTMT6plex [N-Term]; 1xOxidation [M1(100)]; 1xPhospho [S10(100)]	767980426 1xPhospho [S260(100)]	0.000442914	0	1	2	4	767980426	767980426 [251-275]	0	3024.13	M1(Oxidation): 100; S10(Phospho): 100	207.2	243.9	147.6	293.9	206	360.4	127.3	170.6	330.8	566.1	40.98		10.96	104.84	11.29	70.21	27.03		94.61								Unique	3.56022	High	0	0.0004408
High	[K].KEESEESDDDMGFGLFD.[-]	2xTMT6plex [N-Term; K1]; 1xPhospho [S4(100)]	4506671 1xPhospho [S102(100)]	0.0003616	0	1	3	12	4506671	4506671 [99-115]	1	2488.05	S4(Phospho): 100	3632.7	538	4322.2	3428.4	882.8	1955.4	4186.1	1617.2	3852.6	3618.6	80.17	123.78	77.04	82.61	102.82	79.61	94.64	97.87	75.92	80.7		3399.7	3712.7	1694.9	2563		Unique	6.10421	High	0	0.0003828
High	[K].WIPLSSDAQAPLAQPESPTASAGDEPR.[S]	1xTMT6plex [N-Term]; 1xPhospho [S17(100)]	118026942 1xPhospho [S449(100)]	1.32925e-06	0	1	3	5	118026942	118026942 [433-459]	0	3100.48	S17(Phospho): 100	818.5	1191.2	1489.3	823.8	660.8	1278.5	1155	1125.1	1405.5	2174.6	46.75	41.28	51.41	56.27	25.2	26.01	35.79	10.91	35.59	42.05							Unique	8.02431	High	0	3.389e-08
High	[R].GDEEGLGGEEEEEEEEEEEDDSAEEGGAAR.[L]	1xTMT6plex [N-Term]; 1xPhospho [S22(100)]	16306580 1xPhospho [S869(100)]	2.25944e-05	0	1	6	1	16306580	16306580 [848-877]	0	3520.32	S22(Phospho): 100			126	199.6				192		223.2																	Unique	5.21382	High	0	5.035e-06
High	[R].QTPTPPTTQLPQQVQPSLPAAPSADQPQQQPR.[S]	1xTMT6plex [N-Term]; 1xPhospho [T4(99.5)]	50345997 1xPhospho [T887(99.5)]	0.000114895	0	1	2	8	50345997	50345997 [884-915]	0	3741.88	T4(Phospho): 99.42		142.5	156.3	187.5	391.5			149.3	196.5	274.7		14.23															Unique	5.41022	High	0	8.557e-05
High	[R].SSSPTSSLTQPIEMPTLSSSPTEERPTVGPGQQDNPLLK.[T]	2xTMT6plex [N-Term; K39]; 1xOxidation [M14(100)]; 2xPhospho [T5(98); S/T]	38372909 2xPhospho [S744(97.5); S/T]	0.00032935	0	1	5	3	38372909	38372909 [725-763]	0	4728.28	S2(Phospho): 50; S3(Phospho): 50; T5(Phospho): 97.96; M14(Oxidation): 100	1330.4	358	1492.4	246.4	2083.6	424.3	647.4	338	185.2	1095.1											1330.4						Unique	5.18865	High	0	0.0003519
High	[K].REEDEPEERSGDETPGSEVPGDK.[A]	2xTMT6plex [N-Term; K23]; 1xPhospho [S10(100)]	118601081 1xPhospho [S161(100)]	0.000134779	0	1	1	84	118601081	118601081 [152-174]	2	3082.39	S10(Phospho): 100	3806.7	3589.3	3453.9	3829	4330.1	5730.2	2033.5	6826.3	7720.6	3921.2	107.01	109.32	107.07	109.7	99.56	107.27	102.26	111.7	109.96	108.6	472.1	7457	7204.3	93.2			Unique	5.53651	High	0	0.0003986
High	[K].QQPVESSEDSSDESDSSSEEEKKPPTK.[A]	4xTMT6plex [N-Term; K22; K23; K27]; 2xPhospho [T26(87.8); S]		9.25512e-05	0	1	4	6	530394600	530394600 [327-353]	1	4042.87	S17(Phospho): 96.74; S18(Phospho): 96.74	79	313.6	93.5	196.6	257.8	170	107.7	191.5	191.4	113.8																79	Unique	4.17443	High	0	5.98e-05
High	[K].MVIQGPSSPQGEAMVTDVLEDQK.[E]	2xTMT6plex [N-Term; K23]; 2xOxidation [M1(100); M14(100)]; 1xPhospho [S/T]		0.000313341	0	1	6	28	213972636	213972636 [1112-1134]	0	3029.46	M1(Oxidation): 100; S8(Phospho): 100; M14(Oxidation): 100	377.2	314.2	172	252.8	175.6	340.2	183.7	475.4	248.4	248.2	0.82	99.1	58.05	79.29	43.31	20.69	89.87	73.38	66.47	71.77						375	Unique	4.58355	High	0	0.0003354
High	[K].MHEGDEGPGHHHKPGLGEGTP.[-]	2xTMT6plex [N-Term; K13]; 1xPhospho [T20(100)]	4506773 1xPhospho [T113(100)]	2.65158e-05	0	1	1	54	4506773	4506773 [94-114]	0	2714.25	T20(Phospho): 100	5716.8	3834.6	9036.3	3264.6	3991.2	4401.6	3745.8	2490.1	5920.4	7971.5																5716.8	Unique	6.55633	High	0	6.364e-05
High	[R].GEGDAPFSEPGTTSTQRPSSPETATK.[Q]	2xTMT6plex [N-Term; K26]; 1xPhospho [S/T]	118572613 1xPhospho [T328(95.9)]	0.000183813	0	1	2	25	118572613	118572613 [304-329]	0	3173.5	S19(Phospho): 49.81; S20(Phospho): 49.81	3039.8	4040.2	5156.1	5941.9	880.1	366.6	2332.4	1616.8	3660	2705.5	0.54	2.16	2.26	4.34	0.62	50.6	2.12	13.04	16.45	26.47							Unique	4.26124	High	0	0.000174
High	[R].NYAGEEEEEGSGSSEGFDPPATDR.[Q]	1xTMT6plex [N-Term]; 1xPhospho [S/Y/T]		0.000108145	0	1	2	9	224586882	224586882 [191-214]	0	2839.14	S11(Phospho): 49.89; S13(Phospho): 49.89	111	51.3	78.6	53.3	221.6	56.9	70.8	65.3	98.2	159.8	23.38	10.61	7.83	7.4	142.48	38.35	19.22	27.19	8.58	35		129.3	92.6				Unique	4.42599	High	0	7.755e-05
High	[R].LGSTSGEESDLEREVSDSEAGGGPQGER.[K]	1xTMT6plex [N-Term]; 1xPhospho [S16(100)]	21396500 1xPhospho [S370(100)]	4.3888e-05	0	1	1	2	21396500	21396500 [355-382]	1	3144.38	S16(Phospho): 100	168.4	84.8	168.8	295.6	139.5	117.6	111.5	182.1	197.7	93.3																168.4	Unique	6.60343	High	0	1.62e-05
High	[R].GLLAQGLRPESPPPAGPLLNGAPAGESPQPK.[A]	2xTMT6plex [N-Term; K31]; 2xPhospho [S11(100); S27(100)]	767958073 2xPhospho [S695(100); S711(100)]	5.76355e-05	0	1	4	4	767958073	767958073 [685-715]	0	3634.88	S11(Phospho): 100; S27(Phospho): 100	2009.9	2881.4	4398.5	2521	1125.6	1531.9	4615.5	1342.7	2249.5	1819.2	40.43	74.27	74.87	83.63	66.13	63.54	82.47	37.92	87.71	74.16							Unique	7.34857	High	0	8.455e-05
High	[R].GLLAQGLRPESPPPAGPLLNGAPAGESPQPK.[A]	2xTMT6plex [N-Term; K31]; 1xPhospho [S]		3.16608e-05	0	1	4	9	767958073	767958073 [685-715]	0	3554.91	S27(Phospho): 100	98.6	158.2	204.4	120.3	97.3	120.9	155.2	93.2	127	117.5	33.82	62.48	76.37	83.54	107.2	52.67	66.49	26.44	84.19	18.37			136.8	75.7	83.2		Unique	6.1163	High	0	9.122e-06
High	[R].SGSLSLTQFADMISLK.[N]	2xTMT6plex [N-Term; K16]; 1xOxidation [M12(100)]; 1xPhospho [S3(98.9)]	58530840 1xPhospho [S2551(98.9)]	0.000442914	0	1	3	5	58530840	58530840 [2549-2564]	0	2252.16	S3(Phospho): 99.57; M12(Oxidation): 100	1248.3	3894.6	748.5	1146.8	542.9	658.6	1550.2	280.5	294	635.1	17.22	33.3	31.59	19.01	10.7	2.78	30.09	73.42	10.03	23.12							Unique	4.67325	High	0	0.0004408
High	[K].SAEDLTDGSYDDVLNAEQLQK.[L]	2xTMT6plex [N-Term; K21]; 1xPhospho [S1(100)]	238776793 1xPhospho [S45(100)]	1.9789e-06	0	1	4	2	238776793	238776793 [45-65]	0	2849.35	S1(Phospho): 100	10943.8	8556.9	8263.2	1813	45512.9	13475.5	3925.3	1123.4	3441.2	2800.6											10943.8						Unique	7.94082	High	0	6.842e-08
High	[K].SSTPPGESYFGVSSLQLK.[G]	2xTMT6plex [N-Term; K18]; 1xPhospho [S/T/Y]		3.39295e-05	0	1	2	6	118572613	118572613 [1041-1058]	0	2422.23	S2(Phospho): 49.93; T3(Phospho): 49.93	3901.2	3383.2	4086.7	1530.6	2453.7	1541.4	2129.6	914.1	1391.1	2584.6	130.83	128.27	129.72	101.13	132.53	102.7	126.49	92.2	49.1	118.4	7510.4	292					Unique	6.37727	High	0	1.031e-05
High	[K].EMSSDSEYDSDDDRTK.[E]	2xTMT6plex [N-Term; K16]; 1xPhospho [S10(100)]	84043963 1xPhospho [S595(100)]	0.000312758	0	1	1	1	84043963	84043963 [586-601]	1	2418.01	S10(Phospho): 100	396.3	353.2	359.4	449.2	689.8	468.5	378.1	459.2	459.4	241.4																396.3	Unique	5.38578	High	0	0.0003347
High	[R].EEDSQSSSEESDSEEEAPAQAKPSGK.[A]	3xTMT6plex [N-Term; K22; K26]; 1xPhospho [S13(100)]	530380671 1xPhospho [S419(100)]; 207113162 1xPhospho [S419(100)]; 530380673 1xPhospho [S419(100)]	2.7037e-05	0	3	19	22	530380671; 207113162; 530380673	530380671 [407-432]; 207113162 [407-432]; 530380673 [407-432]	0	3505.59	S13(Phospho): 100	392.7	1694.2	759.3	2649.6	1445.9	1027.6	468.9	2215.4	1314.9	550.1	49.54	36.25	66.92	47.05	54.49	26.26	38.7	45.35	79.9	62.34							Not Unique	4.60392	High	0	1.94e-05
High	[K].YGGSVGSQPPPVAPEPGPVPSSPSQEPPTKR.[E]	2xTMT6plex [N-Term; K30]; 1xPhospho [S22(99.4)]	21361517 1xPhospho [S200(98.6)]	3.25636e-05	0	1	3	13	21361517	21361517 [179-209]	1	3621.84	S22(Phospho): 99.6	343.5	308.4	405.5	248.9	340.8	420.1	302.5	391.9	503.8	450.5	26.69	36.1	23.02	66.9	10.44	5.55	35.89	24.84	2.65	51		278.7	408.3				Unique	5.21824	High	0	9.562e-06
High	[K].GYYSPYSVSGSGSTAGSR.[T]	1xTMT6plex [N-Term]; 1xPhospho [S4(99)]	578816045 1xPhospho [S4508(99.1)]	0.00042412	0	1	22	36	578816045	578816045 [4505-4522]	0	2091.92	S9(Phospho): 99.6	210.6	484.2	227.2	277.5	522.6	351.6	512.2	248	475.1	332.2	28.51	79.04	43.82	48.49	106.95	58.34	70.87	68.14	75.98	40.36				275.7	243.1	142.4	Unique	4.39497	High	0	0.00043
High	[R].LAEAPSPAPTPSPTPVEDLGPQTSTSPGRLSPDFAEELR.[S]	1xTMT6plex [N-Term]; 1xPhospho [S31(100)]	355390315 1xPhospho [S1566(93)]	6.11011e-05	0	1	1	10	355390315	355390315 [1536-1574]	1	4324.12	S31(Phospho): 93.03	252.5	271.5	437.5	402.8	149.5	215.9	399.9	280.5	401.8	271																252.5	Unique	6.7144	High	0	0.0003928
High	[R].AQGEPVAGHESPKIPYEK.[Q]	3xTMT6plex [N-Term; K13; K18]; 1xPhospho [S11(100)]	970259874 1xPhospho [S799(100)]	3.7886e-05	0	1	7	27	970259874	970259874 [789-806]	1	2704.43	S11(Phospho): 100	4323.3	3677.5	2281.6	2085.2	7462.1	3552.6	3062.7	2252.2	4477.4	3395.5	5.25	7.93	12.54	46.46	35.96	5.82	21.8	38.61	42.54	18.31	4420.4	4485.4	4064.1				Unique	5.86064	High	0	1.673e-05
High	[K].KGDVEGSQSQDEGEGSGESER.[G]	2xTMT6plex [N-Term; K1]; 1xPhospho [S]	4885399 1xPhospho [S1067(100)]	2.90999e-05	0	1	1	12	4885399	4885399 [1059-1079]	1	2705.19	S16(Phospho): 100	357.7	296.3	141.8	263.5	574.7	432.9	360.6	314.3	368.6	369.7	8.35	3.62	12.86	64.92	70.77	36.16	57.04	51.74	1.85	54.45		336.6	378.8				Unique	6.02163	High	0	7.852e-06
High	[R].TDVSNFDEEFTGEAPTLSPPR.[D]	1xTMT6plex [N-Term]; 1xPhospho [S18(100)]	768003102 1xPhospho [S928(100)]	6.14988e-05	0	1	3	3	768003102	768003102 [911-931]	0	2618.19	S18(Phospho): 100	648.7	986.1	729.4	603.5	825	707.9	377.1	1069.1	964.3	761.3	15.74	10.13	14.91	1.38	20.16	17.69	28.86	0.52	20.5	18.73							Unique	5.28858	High	0	2.941e-05
High	[R].GPSQEEEDNHSDEEDRASEPK.[S]	2xTMT6plex [N-Term; K21]; 2xPhospho [S11(100); S18(100)]	661567300 2xPhospho [S67(100); S74(100)]	0.000182663	0	1	4	15	661567300	661567300 [57-77]	1	3003.23	S11(Phospho): 100; S18(Phospho): 100	482	338.1	800.7	789.9	590.7	1109.3	362.4	1311.8	1071.4	736	24.08	2.61	17.27	17.01	5.84	14.31	4.3	14.42	5.76	8.97		564	399.9				Unique	5.49554	High	0	0.0002927
High	[R].AIGGGLSSVGGGSSTIK.[Y]	2xTMT6plex [N-Term; K17]; 1xPhospho [S7(100)]	5031839 1xPhospho [S540(100)]; 155969697 1xPhospho [S540(100)]	4.8374e-05	0	2	2	79	5031839; 155969697	5031839 [534-550]; 155969697 [534-550]	0	1986.07	S13(Phospho): 100	673.3	760.7	485.3	1080.2	454.7	845.1	2868.4	425.3	386.8	545	127.96	108.17	115.46	133.22	98.25	112.5	100.43	109.78	119.07	86.3		1781.2	1784.8	58.2	78.9		Not Unique	6.52586	High	0	1.923e-05
High	[K].RISIGGGSCAISGGYGSR.[A]	1xTMT6plex [N-Term]; 1xCarbamidomethyl [C9]; 1xPhospho [S3(100)]	119703753 1xPhospho [S71(100)]; 5031839 1xPhospho [S71(100)]; 155969697 1xPhospho [S71(100)]	0.000115143	0	3	3	10	119703753; 5031839; 155969697	119703753 [69-86]; 5031839 [69-86]; 155969697 [69-86]	1	2063.99	S3(Phospho): 100	424.8	394.4	349.6	390.4	159	350.2	786.3	308.4	251	248.6	73.33	124.59	114.12	115.69	47.03	115.25	96.79	122	89.3	46.58	536.5	746.8	652.5	122.3	66.1		Not Unique	6.63729	High	0	8.58e-05
High	[K].ASEENLLSSSSVPSADRDSSPTTNSK.[L]	2xTMT6plex [N-Term; K26]; 1xPhospho [S/T]		3.0452e-05	0	1	5	5	1034629196	1034629196 [775-800]	1	3204.53	S20(Phospho): 98.78	590.7	782.2	1176.5	604	668.8	482.1	1150.5	726.9	573.3	860.9																590.7	Unique	6.44193	High	0	9.45e-06
High	[K].RPASPSSPEHLPATPAESPAQR.[F]	1xTMT6plex [N-Term]; 2xPhospho [S4(100); S/T]	767975125 2xPhospho [S313(100); S/T]	0.000226328	0	1	5	10	767975125	767975125 [310-331]	0	2672.24	S4(Phospho): 100; S6(Phospho): 100	1039	861.6	904.6	684.4	1012.2	1080	894.9	913.6	1160.1	1039.7																1039	Unique	6.70513	High	0	0.0002305
High	[K].AESSNSSSSDDSSEEEEEK.[L]	2xTMT6plex [N-Term; K19]; 1xPhospho [S12(99.7)]		0.000353998	0	1	4	34	530394600	530394600 [525-543]	0	2571.05	S12(Phospho): 99.71	176	1004.3	130.7	551.2	978	832.2	320.2	575.4	496.2	131.2	73.76	100.32	55.64	69.06	97.06	83.75	76.88	54.11	77.29	98.36		75.8	52.6				Unique	3.97736	High	0	0.0003757
High	[R].GAHGETEAEEGAPEGAEVPQGGEETSGAQQVEGASPGR.[G]	1xTMT6plex [N-Term]; 1xPhospho [S35(100)]	1034627393 1xPhospho [S112(100)]	1.83464e-06	0	1	3	30	1034627393	1034627393 [78-115]	0	3971.74	S35(Phospho): 100	302.2	290.3		819.8	4250.5	494.1	303.2	941.5	268.7	286.9	48.56	104.91			55.52		32.34	51.59	21.34	90.56							Unique	7.0205	High	0	5.976e-08
High	[K].SPSDVKPLPSPDTDVPLSSVEIENPETSDQ.[-]	2xTMT6plex [N-Term; K6]; 1xPhospho [S10(100)]		0.000213793	0	1	4	3	298286506	298286506 [121-150]	0	3717.8	S18(Phospho): 50; S19(Phospho): 50	1210.3	721.8	716.9	344.6	484.9	641.1	428.3	928	511.9	648.8	81.74	82.33	9.38	11.62	42.15	66.01	81.35	100.56	35.74	32.72	1909.8						Unique	5.53524	High	0	0.0002141
High	[R].GPSQEEEDNHSDEEDRASEPK.[S]	2xTMT6plex [N-Term; K21]; 1xPhospho [S11(100)]	661567300 1xPhospho [S74(100)]	6.45929e-06	0	1	4	27	661567300	661567300 [57-77]	1	2923.26	S11(Phospho): 100	902.9	855.3	716.5	896.7	1245	1012.6	448.8	1800.9	1537.3	957.8	100.78	47.94	111.75	55.99	56.62	84.94	81.99	68.59	85.73	75.64			50.5	2019.1	1750.6		Unique	7.20675	High	0	5.513e-07
High	[R].LAEAPSPAPTPSPTPVEDLGPQTSTSPGRLSPDFAEELR.[S]	1xTMT6plex [N-Term]; 2xPhospho [S12(98.5); S31(100)]	355390315 2xPhospho [S1547(98.5); S1566(100)]	2.7628e-05	0	1	1	1	355390315	355390315 [1536-1574]	1	4404.09	S12(Phospho): 98.46; S31(Phospho): 100	1094.4	1159.1	1942.3	257.2	1345.6	986.3	1356.2	231	352.3	1023.3											1094.4						Unique	6.2765	High	0	7.18e-06
High	[R].LPQLVGVSTPLQGGSNSAAAIGQSSGELR.[T]	1xTMT6plex [N-Term]; 1xPhospho [S25(99.6)]	13929462 1xPhospho [S74(99.6)]	6.1632e-05	0	1	2	4	13929462	13929462 [50-78]	0	3103.6	S25(Phospho): 99.61	3261.7	1849.4	2688.5	1960.8	3993.5	3222.7	1151.7	1699.7	1544.5	3132.7											3261.7						Unique	6.24715	High	0	2.955e-05
High	[K].LYQSAGGMPGGMPGGFPGGGAPPSGGASSGPTIEEVD.[-]	1xTMT6plex [N-Term]; 2xOxidation [M8(100); M12(100)]; 1xPhospho [S/T/Y]		4.80611e-05	0	1	1	16	767970091	767970091 [610-646]	0	3687.62	M8(Oxidation): 100; M12(Oxidation): 100; S24(Phospho): 25; S28(Phospho): 25; S29(Phospho): 25; T32(Phospho): 25	1509.3	825.1	2054.6	2203.5	1284.4	2079.2	1942.1	1416.2	1561.6	2322	6.97	26.95	9.19	14.65	13.61	18.52	18.04	31.15	8.37	8.1							Unique	6.18516	High	0	1.901e-05
High	[R].HGGSPQPLATTPLSQEPVNPPSEASPTR.[D]	1xTMT6plex [N-Term]; 2xPhospho [S4(100); S25(99)]	118572613 2xPhospho [S377(100); S398(99.4)]	6.09691e-05	0	1	2	29	118572613	118572613 [374-401]	0	3241.51	S4(Phospho): 100; T10(Phospho): 99.43	314.4	857.7	390	623.7	179.5	496.8	243	480.4	393.9	445.6	55.76	51.8	65.06	69.57	12.62	90.37	65.63	97.55	64.32	61.8	515					190.6	Unique	6.20479	High	0	2.892e-05
High	[K].MVIQGPSSPQGEAMVTDVLEDQK.[E]	2xTMT6plex [N-Term; K23]; 1xOxidation [M1(100)]; 1xPhospho [S/T]	213972636 1xPhospho [S1119(99)]	0.000238015	0	1	6	6	213972636	213972636 [1112-1134]	0	3013.47	M1(Oxidation): 100; S8(Phospho): 100	2551.9	1155.3	2729	880.6	2004.3	2408.9	1271.1	1039.8	977.7	2167.5	107.12	108.98	116.76	82.64	115.86	102.99	110.3	73.22	80.68	100.46	4484.8						Unique	4.6614	High	0	0.0002455
High	[R].TESPATAAETASEELDNR.[S]	1xTMT6plex [N-Term]; 1xPhospho [S3(99.7)]		0.000202673	0	1	2	11	50658065	50658065 [39-56]	0	2200.98	S3(Phospho): 99.73	579.4	1210.2	1909.4	1011.5	2778.1	722.5	947.3	907	677.4	1265.7											579.4						Unique	4.94651	High	0	0.0001993
High	[R].SDGSGESAQPPEDSSPPASSESSSTR.[D]	1xTMT6plex [N-Term]; 1xPhospho [S4(98.9)]		1.91699e-05	0	1	13	28	1034673276	1034673276 [3031-3056]	0	2845.18	S15(Phospho): 99.42	431.9	256.6	669.4	103.7	891.7	675	546.3	1125.5	1160.7	257.2	73.35	63.7	73.76		74.71	63.78	8.06	72.63	97.74	41.92							Unique	5.84086	High	0	3.756e-06
High	[R].SISQSSTDSYSSAASYTDSSDDEVSPR.[E]	1xTMT6plex [N-Term]; 1xPhospho [S20(99.7)]		3.13203e-05	0	1	3	12	21361647	21361647 [66-92]	0	3138.31	S20(Phospho): 99.57	140.3	267.3	120.6	128.4	277.3		92.3	262.1	253	169.5		57.72			34.32		32.71	0.95	52.14	51.98							Unique	5.69862	High	0	8.96e-06
High	[R].EDEGEPGDEGQLEDEGSQEK.[Q]	2xTMT6plex [N-Term; K20]; 1xPhospho [S17(100)]	55749431 1xPhospho [S65(100)]	0.000181518	0	1	1	5	55749431	55749431 [49-68]	0	2715.16	S17(Phospho): 100	1607.7	426	583.3	893.4	3416.3	1042.8	458.7	1382.6	1248.6	574.5	5.08	14.07	14.12	2.26	7.02	6.01	12.81	4.08	18.26	4.91							Unique	4.34439	High	0	0.0001714
High	[R].ASQDTEDEESGASGSDSGGSPLR.[G]	1xTMT6plex [N-Term]; 1xPhospho [S/T]		3.12526e-05	0	1	1	21	530411800	530411800 [9-31]	0	2548.05	S20(Phospho): 100	275.1	704.1	262.2	582.6	512.2	840.7		382.8	1192.3			4.7	55.18	22.5	81.52			46.21	19.62								Unique	5.82483	High	0	8.917e-06
High	[R].VADAKGDSESEEDEDLEVPVPSR.[F]	2xTMT6plex [N-Term; K5]; 2xPhospho [S8(100); S10(100)]	767923834 2xPhospho [S78(100); S80(100)]	0.000140393	0	1	5	135	767923834	767923834 [71-93]	1	3091.38	S8(Phospho): 100; S10(Phospho): 100	15650.9	16337.1	23888.1	29878.9	16152.1	37729.1	38331.1	31814.4	41109.4	51047.8	13.9	17.99	43.34	26.29	19.8	34.6	32.77	34.6	38.14	31.89							Unique	5.88588	High	0	0.0001171
High	[K].SNDSTEQNLSDGTPMPDSYPTTPSSTDAATSESK.[E]	2xTMT6plex [N-Term; K34]; 1xOxidation [M15(100)]; 1xPhospho [T/S/Y]		5.40148e-05	0	1	13	9	1034673276	1034673276 [2853-2886]	0	4072.77	T13(Phospho): 49.57; M15(Oxidation): 100; S18(Phospho): 49.57	91.7	82	204.3	65.7	171.7	108.3	113.7	86.5	105.1	165.3																91.7	Unique	5.76312	High	0	4.008e-05
High	[R].KQSQIQNQQGEDSGSDPEDTY.[-]	2xTMT6plex [N-Term; K1]; 1xPhospho [S15(99.2)]		9.93978e-05	0	1	6	19	4557719	4557719 [899-919]	1	2892.29	S13(Phospho): 50; S15(Phospho): 50	341.9	1557	1069.1	1926.6	2966.4	1495	522.9	2190.2	1778.6	805.2	43.68	16.17	11.62	0.4	2.7	3.06	24.37	3.23	0.06	7.2							Unique	4.94937	High	0	6.737e-05
High	[K].EGEEPTVYSDEEEPKDESAR.[K]	2xTMT6plex [N-Term; K15]; 1xPhospho [Y/S/T]	5729875 1xPhospho [S181(100)]	5.09511e-05	0	1	2	80	5729875	5729875 [173-192]	1	2834.27	S9(Phospho): 100	14185.4	14843.7	19848	21833.1	34242.2	29642.4	22167.6	12827.7	26369.4	15481.6	9.44	15.49	3.17	6.57	11.28	8.33	3.73	13.94	9.88	13.81							Unique	6.30086	High	0	2.107e-05
High	[K].KLEKEEEEGISQESSEEEQ.[-]	3xTMT6plex [N-Term; K1; K4]; 1xPhospho [S]		3.18669e-05	0	2	3	205	977380210; 977380212	977380210 [89-107]; 977380212 [88-106]	2	3004.45	S14(Phospho): 50; S15(Phospho): 50	6675	3378.7	5480.1	1726.3	24125.1	2111.8	9252.5	5525.1	4419.2	2702	108.8	88.1	101.61	101.55	79.47	77.05	95.22	108.23	108.33	80.8	450.6	12082.8	13787.8	378.6			Not Unique	6.35064	High	0	3.03e-05
High	[R].LPSGSGAASPTGSAVDIR.[A]	1xTMT6plex [N-Term]; 1xPhospho [S9(100)]		6.47751e-05	0	1	5	60	1034575326	1034575326 [208-225]	0	1951.97	S3(Phospho): 100	2674.8	6101	5167.1	1624.9	2697.6	2489.2	3339.2	1678	1634.9	2192	42.06	116.43	74.73	8.37	84.14	12.21	59.62	21.61	12.04	9.17	3969.8	1939.5	2115.2				Unique	6.43792	High	0	3.227e-05
High	[R].GSSGSVDETLFALPAASEPVIR.[S]	1xTMT6plex [N-Term]; 1xPhospho [S2(99.7)]	24431935 1xPhospho [S181(99.7)]	1.67282e-05	0	1	2	4	24431935	24431935 [180-201]	0	2512.25	S2(Phospho): 99.7	585.4	308.1	333.7	371.1	306.9	349.9	328.5	519.6	305.8	508.3	6.71	13.37	14.27	12.93	4.92	0.3	5.49	2.59	6.36	7.88							Unique	5.66736	High	0	2.958e-06
High	[R].SGGSRSFSTASAITPSVSR.[T]	1xTMT6plex [N-Term]; 1xPhospho [S/T]	119395754 1xPhospho [S16(100)]	0.000102453	0	1	1	14	119395754	119395754 [11-29]	1	2164.06	S6(Phospho): 100	1086.6	1334.4	936.3	700.5	688.5	704.3	2780.2	508.9	969.1	979.3	72.88	74.39	68.05	67.44	63.38	61.93	77.62	58.16	71.37	61.35				1492.9	1592.8	174	Unique	6.03119	High	0	7.077e-05
High	[R].LLEGEDAHLSSSQFSSGSQSSR.[D]	1xTMT6plex [N-Term]; 1xPhospho [S]		2.75088e-05	0	1	1	199	15431310	15431310 [418-439]	0	2618.19	S18(Phospho): 99.6	231.8	460.8	622	1151.4	391.2	616	1847	332	382.8	300.3	105.62	155	174.32	188.23	140.85	167.64	184.13	128.08	130.46	118.16		69.1	134.7	155.3	215.4	615.8	Unique	6.34604	High	0	9.541e-06
High	[K].AAESSSDSSDSDSSEDDEAPSKPAGTTK.[N]	3xTMT6plex [N-Term; K22; K28]; 1xPhospho [S/T]	530394600 1xPhospho [S373(99.1)]	8.30654e-05	0	1	4	42	530394600	530394600 [369-396]	0	3525.58	S8(Phospho): 99.66	71	287	155.4	446.9	111.2	642.4	129.4	499.7	520.2	187.6	45.03	85.77	21.83	31.9	4.22	82.19	16.18	31.16	19.58	27.13		93.6	48.4				Unique	4.53088	High	0	4.966e-05
High	[K].EVDPSTGELQSLQMPESEGPSSLDPSQEGPTGLK.[E]	2xTMT6plex [N-Term; K34]; 1xPhospho [S22(99.2)]	4505571 1xPhospho [S366(99.5)]	4.92925e-06	0	1	2	18	4505571	4505571 [345-378]	0	4064.93	S22(Phospho): 99.17	1752.6	661.8	1345.4	834.8	701.6	860.7	1662.8	514.5	1668.4	1067.3	8.27	4.54	0.96	4.9	4.48	9.19	6.47	38.78	2.11	10.96				1650.2	1855.1		Unique	7.25178	High	0	3.419e-07
High	[K].QVPGGGGGGGSGGGGGSGGGGSGGGR.[G]	1xTMT6plex [N-Term]; 1xPhospho [S17(100)]	24497620 1xPhospho [S22(100)]	6.25721e-05	0	1	2	1	24497620	24497620 [6-31]	0	2152.93	S17(Phospho): 100	89.9	139.2	94.6	125.1	126.3	103.9	89.9	124.7	149.9	110.7																89.9	Unique	5.70026	High	0	3.027e-05
High	[K].EVDPSTGELQSLQMPESEGPSSLDPSQEGPTGLK.[E]	2xTMT6plex [N-Term; K34]; 1xOxidation [M14(100)]; 1xPhospho [S/T]		8.86334e-05	0	1	2	22	4505571	4505571 [345-378]	0	4080.92	M14(Oxidation): 100; S17(Phospho): 33.33; S21(Phospho): 33.33; S22(Phospho): 33.33	168.9	86	128.4	69.1	108.4	99.8	107.8	66.4	119.3	116.6														168.9			Unique	4.13171	High	0	5.553e-05
High	[R].LLEGEDAHLSSSQFSSGSQSSR.[D]	1xTMT6plex [N-Term]; 3xPhospho [S15(99.3); S18(99.3); S]	15431310 3xPhospho [S428(99.3); S432(99.3); S435(100)]	0.000358421	0	1	1	7	15431310	15431310 [418-439]	0	2778.13	S11(Phospho): 99.31; S15(Phospho): 99.32; S18(Phospho): 99.99	333.4	337.5	333	538.5	253.3	364.9	446	302.9	319.8	342.1																333.4	Unique	4.67281	High	0	0.0003797
High	[K].WGQPPSPTPVPRPPDADPNTPSPKPLEGRPER.[Q]	2xTMT6plex [N-Term; K24]; 2xPhospho [S22(100); S/T]	578822553 2xPhospho [S531(98.4); S/T]; 578822559 2xPhospho [S524(98.4); S/T]	0.000164052	0	2	17	89	578822553; 578822559	578822553 [510-541]; 578822559 [503-534]	0	4088.02	S6(Phospho): 98.53; S22(Phospho): 99.98	1963.8	1851.4	1467.1	2621.6	1862.3	2476.7	1494.8	2660	2130.5	1876.4	83.35	84.46	83.98	85.01	85.68	84.79	85.6	86.01	84.36	84.46		2833.4	2982.3	75.7			Not Unique	7.00903	High	0	0.0001481
High	[R].SQSSEGVSSLSSSPSNSLETQSQSLSR.[S]	1xTMT6plex [N-Term]; 2xPhospho [S3(99.4); S26(100)]	530360483 2xPhospho [S90(100); S101(99.5)]	3.02551e-05	0	1	5	5	530360483	530360483 [76-102]	0	3145.38	S3(Phospho): 99.43; S8(Phospho): 100	193.4	208.8	318.2	207.2	191.9	240.4	189.9	236.7	272.6	272.4																193.4	Unique	7.90355	High	0	8.401e-06
High	[R].QSSATSSFGGLGGGSVR.[F]	1xTMT6plex [N-Term]; 1xPhospho [S/T]		0.000168628	0	1	1	50	24234699	24234699 [8-24]	0	1863.88	S15(Phospho): 100	1583.1	1702.1	1037.8	429.6	731.1	1212.7	554.3	488.8	641.8	764.1	93.4	83.77	89.62	88.86	66.94	78.41	89.12	82.33	85.7	73.41		2314	3792.6				Unique	5.23775	High	0	0.0002972
High	[K].WGQPPSPTPVPRPPDADPNTPSPKPLEGRPER.[Q]	2xTMT6plex [N-Term; K24]; 1xPhospho [S6(100)]	578822553 1xPhospho [S515(100)]; 578822559 1xPhospho [S508(100)]	0.000251665	0	2	17	7	578822553; 578822559	578822553 [510-541]; 578822559 [503-534]	0	4008.05	S6(Phospho): 100	265.6	274.5	238.3	372	226.2	385.9	230.7	307	327.9	255.4	48.96	10.23	3.99	5.49	6.02	9.31	6.49	9.96	10.28	17.34							Not Unique	4.2465	High	0	0.0002625
High	[R].SPEGPREEEAAGGEEESPDSSPHGEASR.[G]	1xTMT6plex [N-Term]; 1xPhospho [S]	1034627393 1xPhospho [S397(99.6)]	0.000252663	0	1	3	2	1034627393	1034627393 [377-404]	1	3189.34	S21(Phospho): 99.64					1176.7																						Unique	3.88834	High	0	0.0002638
High	[R].GGSTSYGTGSETESPR.[N]	1xTMT6plex [N-Term]; 1xPhospho [T/S/Y]	4503689 1xPhospho [S281(100)]	0.000172225	0	1	2	6	4503689	4503689 [272-287]	0	1881.81	S10(Phospho): 100	36.4	520.2	785.4	395.4	134	127.5	3236.6	671.4	143.7	580.1		65.25	27.34	116.2			78.91	62.88		109.9						36.4	Unique	5.65428	High	0	0.0001591
High	[R].AQSSPAAPASLSAPEPASQAR.[V]	1xTMT6plex [N-Term]; 1xPhospho [S3(99.7)]	767974611 1xPhospho [S569(99.7)]	0.000168628	0	1	10	8	767974611	767974611 [567-587]	0	2303.12	S3(Phospho): 99.68	110.6	142.3	69.8	89.1	126.6	117.2	99	117.9	112	117.6	6.35	14.25	16.27	26.54	19.09	20.52	21.47	19.03	23.85	20.47			113.7				Unique	5.16949	High	0	0.0001609
High	[R].GDQPAASGDSDDDEPPPLPR.[L]	1xTMT6plex [N-Term]; 1xPhospho [S10(100)]		5.1028e-06	0	1	2	470	5729875	5729875 [48-67]	0	2345.01	S10(Phospho): 100	10209.9	7732	12356	10174.3	18304.4	11573.7	8824.8	12878.4	10481.2	9270.8	126.07	126.18	105.71	121.21	124.75	120.94	123.75	124.1	122.46	122.43	450.6	22507	25944.4	2013.2	134.3		Unique	7.64353	High	0	6.174e-07
High	[R].KVEEEGSPGDPDHEASTQGR.[T]	2xTMT6plex [N-Term; K1]; 1xPhospho [S7(100)]	33286446 1xPhospho [S315(100)]	1.62293e-05	0	1	1	16	33286446	33286446 [309-328]	1	2663.24	S7(Phospho): 100	555.9	805.8	999.8	1507.4	724.5	1367.4	531.4	1133.4	1956.8	783.1	14.39	2.51	7.51	7.59	6.87	0.78	7.47	7.12	7.5	1.71		499.4	612.5				Unique	6.39027	High	0	2.805e-06
High	[R].SASSSSSSSSSSDSDVSVK.[K]	2xTMT6plex [N-Term; K19]; 1xPhospho [S]	768004469 1xPhospho [S290(100)]	0.000257697	0	1	5	46	768004469	768004469 [277-295]	0	2316.05	S14(Phospho): 100	167.1	1119.8	251.9	230.8	992.8	226.9	135.7	191.6	311.3	102.6	52.74	51.33	34.87	41.44	79.71	49.43	28.84	35.57	46.15	55.48		104.8	229.4				Unique	4.20789	High	0	0.00027
High	[R].SPSGGAAGPLLTPSQSLDGSR.[R]	1xTMT6plex [N-Term]; 1xPhospho [S1(100)]	19923973 1xPhospho [S185(100)]	1.83584e-05	0	1	1	42	19923973	19923973 [185-205]	0	2264.11	S1(Phospho): 100	1945.9	2236.9	1532.2	949.6	1323.4	1799.7	1018.2	1436.3	1519.7	1083.5	74.93	89.6	83.19	95.5	83.69	87.9	75.11	104.65	77.53	68.15		697.8	677.7				Unique	6.86035	High	0	3.482e-06
High	[R].LPSGSGAASPTGSAVDIR.[A]	1xTMT6plex [N-Term]; 2xPhospho [S3(100); S9(100)]	1034575326 2xPhospho [S210(100); S/T]	0.000226786	0	1	5	118	1034575326	1034575326 [208-225]	0	2031.94	S3(Phospho): 100; S9(Phospho): 100	2904	1917.6	3012.9	1392.8	1321.3	2607.1	2710.7	1501.6	1265.6	3331.2	133.04	131.45	132.25	129.26	129.8	131.83	132.77	126.91	127.74	131.5				7280.3	6987.4	208.6	Unique	6.43275	High	0	0.0002313
High	[R].EQSSEAAETGVSENEENPVR.[I]	1xTMT6plex [N-Term]; 1xPhospho [S3(99.8)]	155030216 1xPhospho [S1195(100)]	0.000274315	0	1	1	4	155030216	155030216 [1184-1203]	0	2471.08	S3(Phospho): 99.75		248.5	293.2	265.2	455.3	255.5	159.1	418.9	361.9	247.5			51.51	37.69	53.9	59.17	82.45	32.56	39.8	42.34							Unique	5.07134	High	0	0.0002903
High	[K].APVSSTESVIQSNTPTPPPSQPLNETAEEESR.[I]	1xTMT6plex [N-Term]; 1xPhospho [S/T]		2.147e-07	0	1	5	37	530367488	530367488 [895-926]	0	3688.74	T16(Phospho): 100	214	142.7	177.6	103.8	163	108.9	113.1	185.1	153.1	196	16.23	25.49	12.33	44.68	1.44	9.89	29.37	62.72	31.4	47.85		238.5	189.4				Unique	8.92642	High	0	1.357e-09
High	[R].GSDNEGSGQGSGNESEPEGSNNEASDR.[G]	1xTMT6plex [N-Term]; 1xPhospho [S20(100)]	7661950 1xPhospho [S1156(100)]	2.68621e-05	0	1	1	1	7661950	7661950 [1137-1163]	0	2976.16	S20(Phospho): 100				207.5		160.5	88.5	275.6	214.4																		Unique	4.51985	High	0	6.821e-06
High	[R].SSSPTSSLTQPIEMPTLSSSPTEERPTVGPGQQDNPLLK.[T]	2xTMT6plex [N-Term; K39]; 2xPhospho [S1(98.7); T5(99.1)]	38372909 2xPhospho [S725(98.7); T729(99.1)]	2.82321e-05	0	1	5	5	38372909	38372909 [725-763]	0	4712.28	S2(Phospho): 50; S3(Phospho): 50; T5(Phospho): 99.06	3090	1474.4	7308.5	1770.1	8160.6	2832.7	3107.6	1476	1160.6	3958.5											3090						Unique	6.7128	High	0	7.46e-06
High	[R].LEEGVASDEEAEEAQPGSGPSPEPEGSPPAHPQ.[-]	1xTMT6plex [N-Term]; 1xPhospho [S27(100)]		3.06502e-05	0	1	5	11	768011134	768011134 [2011-2043]	0	3620.58	S27(Phospho): 100	93.9	93.1	143	185.1	143.1	126.7	104.5	163.8	165.5	148.4	13.86	28.72	18.95	12.97	1.49	24.91	3.38	40.31	0.26	23.44		84.7	103.1				Unique	4.11998	High	0	8.597e-06
High	[K].SHVEDGDIAGAPASSPEAPPAEQDPVQLK.[T]	2xTMT6plex [N-Term; K29]; 1xPhospho [S]		3.13881e-05	0	1	1	8	110611218	110611218 [830-858]	0	3450.68	S14(Phospho): 50; S15(Phospho): 50	368.8	595.1	791.3	475.3	337	1065.6	596.7	213.5	628.1	657	36.36	32.39	12.67	58.36	4.32	12.1	36.08	4.63	4.46	58.14							Unique	4.67363	High	0	8.975e-06
High	[K].GSPLNAAPYGIESMSQDTEVR.[S]	1xTMT6plex [N-Term]; 1xPhospho [S2(100)]	4506289 1xPhospho [S352(100)]	0.000273784	0	1	2	2	4506289	4506289 [351-371]	0	2531.17	S2(Phospho): 100	54.4	29.1	54	61.6	40.4	48.7	47.9	42.5	49	55.1																54.4	Unique	4.21512	High	0	0.0002898
High	[R].QDDSSSSASPSVQGAPR.[E]	1xTMT6plex [N-Term]; 1xPhospho [S]	767954354 1xPhospho [S359(100)]	0.000147168	0	1	10	9	767954354	767954354 [351-367]	0	1984.88	S9(Phospho): 100	141.7	213.1	54.7	125.9	69	80.8	51.4	30.9	113.7	226.3	41.31	37.34	0.56	56.68	27.44	30.44	3.2		3.19	9.46		100.3	183.1				Unique	4.84881	High	0	0.0001262
High	[R].HQASDSENEELPKPR.[I]	2xTMT6plex [N-Term; K13]; 1xPhospho [S]	530369278 1xPhospho [S242(99.6)]; 1xPhospho [S504(99.6)]	0.00011971	0	1	7	46	530369278	530369278 [237-251]; [263-277]	0	2275.11	S6(Phospho): 99.78	2293.9	2822.8	2830.2	3090.7	3779.2	3524.8	1527.7	3526.2	3738	2055.8	0.27	4.99	5.2	4.67	1.42	13.85	4.98	2.09	0.47	4.48		2289.5	2298.3				Unique	5.48192	High	0	0.000274
High	[R].TPSPLVLEGTIEQSSPPLSPTTK.[L]	2xTMT6plex [N-Term; K23]; 1xPhospho [S19(99.1)]	339409180 1xPhospho [S321(100)]	9.81163e-05	0	1	3	4	339409180	339409180 [303-325]	0	2917.56	S19(Phospho): 100	230.8	41.2	128.1	82.8	49.7	212.8	90.2	147.8	140.3	163.9																230.8	Unique	5.7789	High	0	6.595e-05
High	[K].ALDISLSSGEEDEGDEEDSTAGTTK.[Q]	2xTMT6plex [N-Term; K25]; 2xPhospho [S7(99.6); S8(100)]	194097365 2xPhospho [S335(99.6); S336(100)]	7.43908e-05	0	1	1	2	194097365	194097365 [329-353]	0	3174.35	S7(Phospho): 99.59; S8(Phospho): 100	3700.5	1803.7	2040.4	4129.8	959.8	3498	1735.3	8527.7	2420.8	2990.7	38	33.43	50.21	36.4	11.18	31.07	27.33	39.76	36.78	24.11							Unique	6.52741	High	0	4.102e-05
High	[K].APVSSTESVIQSNTPTPPPSQPLNETAEEESR.[I]	1xTMT6plex [N-Term]; 2xPhospho [S/T]		7.33837e-06	0	1	5	10	530367488	530367488 [895-926]	0	3768.71	S12(Phospho): 66.67; T14(Phospho): 66.67; T16(Phospho): 66.67	375.5	283.9	328.1	288.1	249.3	281.1	261.3	258	325.3	333.9																375.5	Unique	6.74416	High	0	1.106e-05
High	[R].KDDDSDDESQSSHTGK.[K]	3xTMT6plex [N-Term; K1; K16]; 1xPhospho [S5(100)]	24308039 1xPhospho [S458(100)]	0.000128268	0	1	1	34	24308039	24308039 [454-469]	1	2518.15	S5(Phospho): 100	1698.4	1384.6	4300.5	1589.7	2430.3	2866.9	2030.8	2302.8	3013.8	1013.2	17.49	15.4	7.62	12.02	19.63	16.97	13.35	8.57	9.38	9.52				1908.4	1488.3		Unique	5.64073	High	0	0.0002632
High	[R].SFSTASAITPSVSR.[T]	1xTMT6plex [N-Term]; 1xPhospho [S/T]		0.000201006	0	1	1	167	119395754	119395754 [16-29]	0	1719.85	S11(Phospho): 99.77	6200	3860.7	3370.9	1452.3	936.2	2256.4	5354.8	1057.7	1343.2	1893.3	145.85	162.06	138.67	129.74	115.12	129.81	143.07	137.62	112.77	152.21		2166.9	2336.2	844.5	1432.9	1985.8	Unique	5.04044	High	0	0.0001969
High	[R].AHTPTPGIYMGRPTHSGGGGGGGGGGGGGGGGR.[R]	1xTMT6plex [N-Term]; 1xPhospho [T3(100)]	9558733 1xPhospho [T202(100)]	0.000139792	0	1	4	10	9558733	9558733 [200-232]	0	3100.41	T3(Phospho): 100	233.3	203.2	208.3	282.9	319.7	330.6	314.1	283.3	354.9	713.7	18.63	22.71	23.67	27.7	39.89	20.05	10.2	39.12	40	25.19				264	202.6		Unique	4.48528	High	0	0.0001165
High	[R].GGSLLAGGGGFGGGSLSGGGGSR.[S]	1xTMT6plex [N-Term]; 1xPhospho [S15(100)]	24430190 1xPhospho [S34(100)]	1.24037e-06	0	1	3	134	24430190	24430190 [20-42]	0	2131.01	S15(Phospho): 100	4672.7	1774.3	1810.9	727.2	746.6	854.3	1840	704.7	971.3	1031.3	103.43	99.73	115.18	99.12	90.01	98.98	136.12	104.03	99.28	117.95		12555.4	12381.9	2556.8	1537.4		Unique	8.35505	High	0	1.311e-07
High	[R].TPSPLVLEGTIEQSSPPLSPTTK.[L]	2xTMT6plex [N-Term; K23]; 2xPhospho [S3(99.6); S15(100)]	339409180 2xPhospho [S317(100); S321(100)]	1.4347e-05	0	1	3	12	339409180	339409180 [303-325]	0	2997.52	S3(Phospho): 99.52; S15(Phospho): 100	19685.8	22844.8	31431	23431.2	6209.3	21164.2	4965.2	41635.6	22634.9	2626.1	143.87	161.24	175.25	160.59	150.63	155.6	116.92	156.49	136.55	74.95	2939.8						Unique	7.68399	High	0	6.647e-06
High	[K].ELQGDGPPSSPTNDPTVK.[Y]	2xTMT6plex [N-Term; K18]; 1xPhospho [S/T]	530409847 1xPhospho [S772(99.2)]	4.79573e-05	0	1	20	19	530409847	530409847 [763-780]	0	2377.17	S10(Phospho): 99.72	1275.4	848.9	694.8	421.2	979.7	624.7	260.1	559.8	610.5	812.2	21.19	29.98	1.4	26.58	42.56	28.53	19.52	46.98	50.82	28.5	965.6	1397.8	1462.8				Unique	5.14449	High	0	0.000128
High	[R].GGSLLAGGGGFGGGSLSGGGGSR.[S]	1xTMT6plex [N-Term]; 2xPhospho [S]	24430190 2xPhospho [S34(98.7); S]	0.000204773	0	1	3	6	24430190	24430190 [20-42]	0	2210.98	S15(Phospho): 100; S17(Phospho): 100	336.7	172.8	240.4	147	140.3	174.4	190.4	165.4	181.1	194.5				5.38			0.34			10.86						336.7	Unique	4.71816	High	0	0.0002363
High	[R].ASSHSSQTQGGGSVTK.[K]	2xTMT6plex [N-Term; K16]; 1xPhospho [S2(99.7)]	5031875 1xPhospho [S403(99.7)]; 27436946 1xPhospho [S403(99.7)]	0.000255674	0	2	8	101	5031875; 27436946	5031875 [402-417]; 27436946 [402-417]	0	2057.01	S6(Phospho): 100	499.5	9717.9	8238.5	3119.3	8056.5	1530.3	3255.9	900.7	1830.2	856.9	140.46	200.54	191.73	167.11	221.94	197.48	171.93	177.08	198.68	169.16		42.4				139	Not Unique	5.00541	High	0	0.0002677
High	[R].TEEVQDDNWGETTTAITGTSEHSISQEDIAR.[I]	1xTMT6plex [N-Term]; 1xPhospho [S23(99.5)]	20373171 1xPhospho [S86(99.5)]	0.00050372	0.000323624	1	1	8	20373171	20373171 [64-94]	0	3729.66	S23(Phospho): 99.47	194.4	128.7	121.6	212.5	107.1	154.8	145.3	168.2	122.7	165.8																194.4	Unique	3.33258	High	0.0001849	0.000481
High	[K].DGQDAIAQSPEKESK.[D]	3xTMT6plex [N-Term; K12; K15]; 1xPhospho [S9(100)]	767985304 1xPhospho [S431(100)]	0.000540804	0.000323624	1	17	19	767985304	767985304 [423-437]	1	2370.22	S9(Phospho): 100	2156.6	1464.7	1499.6	3628.5	808.8	3163.4	1716.6	3577.9	2202	1874	73.51	69.37	74.48	74	57.85	72.27	66.36	75.51	73.19	54.3		3303.8	2818.2				Unique	4.65343	High	0.0001849	0.0004811
High	[R].TVSPGSVSPIHGQGQVVENLK.[A]	2xTMT6plex [N-Term; K21]; 1xPhospho [S8(100)]	194294521 1xPhospho [S889(100)]	0.000532072	0.000323624	1	3	3	194294521	194294521 [882-902]	0	2671.42	S8(Phospho): 100	313.1	287.2	448	280.4	242.6	305.3	298.9	236.1	377.2	298.2																313.1	Unique	4.96278	High	0.0001849	0.0004783
High	[K].VEGSPTEEANLPTELQDNSLSPAASEAGEK.[L]	2xTMT6plex [N-Term; K30]; 2xPhospho [S4(100); S21(100)]	530378473 2xPhospho [S1118(100); S1135(100)]	0.000495028	0.000323624	1	5	4	530378473	530378473 [1115-1144]	0	3688.69	S4(Phospho): 100; S21(Phospho): 100	265.8	96.8	231	138.6	104.6	93.4	198.4	162.4	116.7	209.7																265.8	Unique	5.3741	High	0.0001849	0.0004819
High	[K].SLGSASPGPGQPPLSSPTR.[G]	1xTMT6plex [N-Term]; 1xPhospho [S/T]		0.000527705	0.000323624	1	2	8	767967847	767967847 [679-697]	0	2102.05	S15(Phospho): 49.89; S16(Phospho): 49.89	708.5	250	694.8	172.3	169.4	239	273.9	153.3	339.7	280.4	1.15	5.87	6.23	10.79	1.42	6.64	14.87	0.24	9.47	2.42				702.8	714.3		Unique	4.29684	High	0.0001849	0.0004769
High	[R].QRSPSPAPAPAPAAAAGPPTR.[K]	1xTMT6plex [N-Term]; 2xPhospho [S3(100); S5(100)]	768010386 2xPhospho [S501(100); S503(100)]	0.000469846	0.000323624	1	3	2	768010386	768010386 [499-519]	1	2357.14	S3(Phospho): 100; S5(Phospho): 100	386.4	432.8	546.1	434.9	464.9	563.7	351.5	441	471.6	561.6																386.4	Unique	5.57178	High	9.533e-05	0.0004545
High	[R].AVPAPSPGPTHNSPELGRPPAAGVLAPDMSDKDK.[C]	3xTMT6plex [N-Term; K32; K34]; 1xPhospho [T/S]		0.000494305	0.000323624	1	6	16	1034659998	1034659998 [1257-1290]	1	4144.15	S13(Phospho): 98.2	316.4	186.7	406.9	464.7	195	379.7	393.1	266.9	470.6	265.2	27.28	17.03	12.91	20.43	22.14	0.26	5.94	36.86	5.29	27.59							Unique	4.47603	High	0.0002194	0.0004929
High	[K].ADSSSSEEESSSSEEEK.[T]	2xTMT6plex [N-Term; K17]; 1xPhospho [S]		0.00047701	0.000323624	1	4	16	530394600	530394600 [432-448]	0	2341.98	S12(Phospho): 50; S13(Phospho): 50	446	463.8	103	457.8	469.1	355.6	168.6	432.6	315.6	91.2	23.29	35.62	0.46	37.55	41.17	27.03	47.22	26.17	28.47	52.7		519.4	372.5				Unique	3.59797	High	0.0002784	0.0005281
High	[R].SGSPSDNSGAEEMEVSLAKPK.[H]	3xTMT6plex [N-Term; K19; K21]; 1xPhospho [S]	530403240 1xPhospho [S124(99.2)]	0.000529161	0.000323624	1	2	18	530403240	530403240 [122-142]	0	2887.44	S1(Phospho): 33.33; S3(Phospho): 33.33; S5(Phospho): 33.33	331.4	461.2	515.8	518.8	392.1	720.8	360.5	552.9	546	298.1	34.55	61	55.24	43.32	51.96	63.01	44.02	51.25	70.4	64.63		412.4	250.5				Unique	4.38972	High	0.0001849	0.0004775
High	[K].ASESSSSEESSDDDDEEDQK.[K]	2xTMT6plex [N-Term; K20]; 1xPhospho [S2(100)]	530394600 1xPhospho [S125(100)]	0.000515338	0.000323624	1	4	31	530394600	530394600 [124-143]	0	2714.07	S2(Phospho): 100	894.9	2250.3	413.1	879.1	4166.8	1122.6	404.4	957.8	1447.9	530.8		31.2	39.49	30.54	39.18	69.34	37.74	45.98	65.74	60.96							Unique	6.00651	High	0.0002194	0.0005161
High	[R].GLVAAYSGDSDNEEELVER.[L]	1xTMT6plex [N-Term]; 2xPhospho [S7(100); S10(100)]	5032031 2xPhospho [S621(100); S624(100)]	0.000530617	0.000323624	1	7	6	5032031	5032031 [615-633]	0	2442.03	S7(Phospho): 100; S10(Phospho): 100	278.1	209	213.9	294.4	169.2	206	168.6	220.4	203.1	256.3																278.1	Unique	4.40421	High	0.0002194	0.0004823
High	[K].KKPAPLPPSSSPGPPSQDSR.[Q]	3xTMT6plex [N-Term; K1; K2]; 1xPhospho [S]		0.000527705	0.000323624	1	9	16	768026182	768026182 [381-400]	1	2797.52	S10(Phospho): 49.91; S11(Phospho): 49.91	287.7	472.1	299	355.7	321.2	360.8	567.9	295.7	374.1	368.1	1.13	11.82	21.87	15.8	12.9	16.54	10.13	25.96	21.15	21.98				285.4	290		Unique	3.95178	High	0.0002786	0.0005762
High	[R].GNPEPPVSGEMDDNSLSPEACYECK.[I]	2xTMT6plex [N-Term; K25]; 2xCarbamidomethyl [C21; C24]; 1xOxidation [M11(100)]; 1xPhospho [S8(100)]	281485550 1xPhospho [S2702(100)]	0.000456317	0.000323624	1	1	5	281485550	281485550 [2695-2719]	0	3336.41	S8(Phospho): 100; M11(Oxidation): 100	57.7	96.8	42.6	48.5	201.1	62.4	109.5	59.5	848.5	37.4																57.7	Unique	4.45875	High	9.533e-05	0.0004479
High	[K].SGTAETEPVEQDSSQPSLPLVR.[A]	1xTMT6plex [N-Term]; 2xPhospho [S14(99.4); S17(100)]	213972636 2xPhospho [S836(99.4); S839(100)]	0.000518974	0.000323624	1	5	1	213972636	213972636 [823-844]	0	2716.23	S14(Phospho): 99.35; S17(Phospho): 100	106.9	78.2	75.6	76.3	94.1	100.5	83.9	92.6	102.5	126.2																106.9	Unique	3.73498	High	9.533e-05	0.000474
High	[K].YGGSVGSQPPPVAPEPGPVPSSPSQEPPTK.[R]	2xTMT6plex [N-Term; K30]; 1xPhospho [S/Y/T]		0.000487083	0.000323624	1	3	11	21361517	21361517 [179-208]	0	3465.73	S22(Phospho): 99.39	803.2	467.2	641.4	370.4	968.7	459.5	481.2	639	555.7	610	46.6	47.27	15.69	35.82	1.57	57.28	7.68	35.01	26.46	5.52							Unique	3.76201	High	9.533e-05	0.0004619
High	[K].EPLLPPEDDTRDNVYYYDEEGGGEEDQDFDLSQLHR.[G]	1xTMT6plex [N-Term]; 1xPhospho [T10(100)]	4757960 1xPhospho [T748(100)]	0.000540077	0.000323624	1	5	9	4757960	4757960 [739-774]	1	4564.98	T10(Phospho): 100	65.3	51	72.4	55.1	51.4	63	47.6	52.5	75.5	72.5																65.3	Unique	3.89874	High	0.0001849	0.0004807
High	[K].DSPSKSSAEAQTPEDTPNK.[S]	3xTMT6plex [N-Term; K5; K19]; 1xPhospho [S/T]	332205947 1xPhospho [S71(99.7)]	0.000468417	0.000323624	1	4	22	332205947	332205947 [65-83]	1	2756.36	S7(Phospho): 99.73	313.1	544.1	186.4	493.8	638.3	925.1	694.4	749.6	1228.2	556.5	14.75	19.16	26.36	15.22	11.43	12.19	14.55	5.74	14.43	6.02							Unique	4.86194	High	9.533e-05	0.0004537
High	[R].DSHSPDLQLPTPEVIPSSGSK.[L]	2xTMT6plex [N-Term; K21]; 1xPhospho [S/T]	530362268 1xPhospho [S7586(99.6)]	0.000532072	0.000323624	1	24	23	530362268	530362268 [7583-7603]	0	2729.38	S4(Phospho): 99.74	2485	773.2	765.3	693	1470.1	1133.2	3795.4	942.8	1367.3	722.9	33.91	18.05	24.9	16.45	42.37	35.36	24.74	5.98	20.61	29.98							Unique	3.84912	High	0.0001849	0.0004783
High	[K].QNLLAPQNAVSSEETNDFK.[Q]	2xTMT6plex [N-Term; K19]; 1xPhospho [S11(99.7)]	91206462 1xPhospho [S62(99.7)]	0.000543714	0.000323624	1	2	5	91206462	91206462 [52-70]	0	2643.31	S12(Phospho): 99.24	71.1	113.4	52.3	171	82.8	60.7	36.9	47.7	43	85.9	9.38	7.87	24.59	30.25	46.69	51.4	9.43	12.33	40.72	26.72							Unique	3.88531	High	0.0002194	0.000482
High	[K].AIEPQKEEADENYNSVNTR.[M]	2xTMT6plex [N-Term; K6]; 1xPhospho [S15(100)]	20149560 1xPhospho [S117(99.4)]	0.0004549	0.000323624	1	4	8	20149560	20149560 [103-121]	1	2745.31	S15(Phospho): 100	800.6	401.8	404.4	531.7	247.3	627.7	402.9	484	654.8	399.3	65.5	43.21	60.43	40.46	39.75	45.27	41.87	39.12	51.82	39.25				889.2	1275.1		Unique	4.39605	High	9.533e-05	0.0004748
High	[R].RSSSDEQGLSYSSLK.[N]	2xTMT6plex [N-Term; K15]; 1xPhospho [S/Y]		0.000492136	0.000323624	1	2	15	4504661	4504661 [554-568]	1	2182.08	S2(Phospho): 50; S3(Phospho): 50	892.7	346.8	650.8	1177.6	455.3	838.1	706.3	569.4	638.6	779.1	50.3	34.25	54.34	56.19	43.75	41.73	38.68	39.07	48.86	37.4		575.2	1210.2				Unique	5.04554	High	9.533e-05	0.000464
High	[K].KAEGEPQEESPLK.[S]	3xTMT6plex [N-Term; K1; K13]; 1xPhospho [S10(100)]	117938254 1xPhospho [S177(100)]; 7661958 1xPhospho [S177(100)]	0.000516792	0.000323624	2	8	2	117938254; 7661958	117938254 [168-180]; 7661958 [168-180]	1	2209.17	S10(Phospho): 100	474.4	621.2	482.3	835.5	584	635.5	400.7	906.2	981.3	475.8	31.87	50.27	27.58	21.62	25.22	27	19.27	12.68	9.61	4							Not Unique	3.71392	High	9.533e-05	0.0004731
High	[R].DSVDSAGTSPTAVLAAGEEVGAGGGPGGGRPGAGTPLR.[Q]	1xTMT6plex [N-Term]; 1xPhospho [T/S]		0.000449246	0.000323624	1	1	14	38679907	38679907 [6-43]	0	3657.77	T8(Phospho): 50; S9(Phospho): 50	129.3	59.6	131.4	156.5	78.6	105.2	189.9	70.3	152.2	184.7		16.97	2.86	7.68	15.27	5.28	2.52	45.24	3.09	26.03		129.3					Unique	3.78204	High	9.533e-05	0.0004444
High	[K].EDLPAENGETKTEESPASDEAGEK.[E]	3xTMT6plex [N-Term; K11; K24]; 1xPhospho [T/S]	48255933 1xPhospho [S86(97.9)]	0.000463423	0.000323624	1	1	19	48255933	48255933 [72-95]	1	3300.56	S15(Phospho): 99.21	492.4	200.4	608.8	458.7	221.4	562.9	323.3	990.7	737.1	432.6	64.82	38.02	59.37	61.44	41.17	66.66	50.65	67.81	65.78	52.79				530	791.1	156.1	Unique	4.32367	High	9.533e-05	0.0004515
High	[R].SASSSEEEELYLGPSGPTR.[G]	1xTMT6plex [N-Term]; 1xPhospho [S3(99.6)]	47086495 1xPhospho [S34(99.4)]	0.000524794	0.000323624	1	1	9	47086495	47086495 [30-48]	0	2305.04	S5(Phospho): 99.53	399.6	243.6	219.3	305.5	349.1	392.2	261.3	443.1	238.1	602.6																399.6	Unique	5.09196	High	0.0001849	0.000476
High	[R].GDVTAEEAAGASPAK.[A]	2xTMT6plex [N-Term; K15]; 1xPhospho [S12(100)]	13491174 1xPhospho [S22(100)]	0.000528433	0.000323624	1	1	6	13491174	13491174 [11-25]	0	1911.95	S12(Phospho): 100	760.3	421.3	525.9	227	620.7	486.2	204.3	301.1	588	394.9	3.8	12.07	15.15	17.16	6.21	10.35	6.53	51.22	4.37	6.94							Unique	4.09555	High	0.0001849	0.0004772
High	[R].VDDSPSTSGGSSDGDQR.[E]	1xTMT6plex [N-Term]; 1xPhospho [T/S]		0.000493582	0.000323624	1	2	34	530373079	530373079 [8-24]	0	1975.81	S12(Phospho): 99.6	115	305.9	85.6	281.7	211.9	194.1	217.1	209.6	160.3	214.3	97.89	73.6	83.55	76.33	69.55	80.76	109.14	93.34	76.46	76.28			61	77.7	44.8		Unique	4.42784	High	9.533e-05	0.0004647
High	[R].IHRASDPGLPAEEPK.[E]	2xTMT6plex [N-Term; K15]; 1xPhospho [S5(100)]	18105007 1xPhospho [S1859(100)]	0.000510252	0.000323624	1	2	18	18105007	18105007 [1855-1869]	1	2155.13	S5(Phospho): 100	1280.2	2655.4	1579	800.1	3670.5	1639.4	1076.3	1448.4	1614.1	1479	11.32	15.08	0.92	29.44	0.31	4.92	9.21	0.01	0.4	7.82							Unique	4.28432	High	9.533e-05	0.0004709
High	[R].RPEGPGAQAPSSPR.[V]	1xTMT6plex [N-Term]; 1xPhospho [S]		0.00052625	0.000323624	1	4	15	1034556295	1034556295 [537-550]	0	1715.84	S12(Phospho): 99.61	316.4	569.6	645.2	505.5	1198.1	596.1	315.8	514.9	408.7	386.1	90.16	79.26	83.84	83.1	131.48	81.67	81.89	103.59	80.68	54.41	643.8	120.4	185.2				Unique	4.52437	High	0.0001849	0.0004764
High	[R].GPAGEAGASPPVRR.[V]	1xTMT6plex [N-Term]; 1xPhospho [S9(100)]	5803177 1xPhospho [S110(100)]	0.000492136	0.000323624	1	1	7	5803177	5803177 [102-115]	1	1630.83	S9(Phospho): 100	230.9	660.7	737	833	391	873.9	382.3	701.8	1151.6	601.9	6.06	20.3	30.73	24.19	23.91	36.63	25.12	16.53	15.74	37.25		240.8	221				Unique	4.71007	High	9.533e-05	0.000464
High	[R].QSHSESPSLQSK.[S]	2xTMT6plex [N-Term; K12]; 1xPhospho [S]	118572613 1xPhospho [S1083(99.5)]	0.00050227	0.000323624	1	2	16	118572613	118572613 [1078-1089]	0	1852.92	S6(Phospho): 100	1075.6	3055.6	2605.6	4149.1	4431.6	1263.1	1370.6	3447.4	3258.3	2046.2	124.6	127.14	128.94	130.59	130.4	124.62	127.74	127.34	131.72	125.86						128.2	Unique	4.83904	High	9.533e-05	0.0004678
High	[K].EKLQEEGGGSDEEETGSPSEDGMQSAR.[T]	2xTMT6plex [N-Term; K2]; 1xOxidation [M23(100)]; 2xPhospho [S10(99); S17(100)]	5902034 2xPhospho [S50(99); S57(100)]	0.000482041	0.000323624	1	1	2	5902034	5902034 [41-67]	1	3473.43	S10(Phospho): 100; S17(Phospho): 99.98; M23(Oxidation): 100	258.7	145.1	183	282.3	126.5	177.8	204.9	160.3	161.3	389.8																258.7	Unique	4.07105	High	9.533e-05	0.0004598
High	[R].QASTDAGTAGALTPQHVR.[A]	1xTMT6plex [N-Term]; 2xPhospho [S3(99.7); T13(100)]	530397737 2xPhospho [S109(99.7); T119(100)]	0.000521884	0.000323624	1	12	5	530397737	530397737 [107-124]	0	2169.99	S3(Phospho): 99.62; T13(Phospho): 100	176.1	319	171.8	171.2	384.4	273.6	224.3	379.2	261.1	329	47.24	27.46	25.76	47.91	12.52	46.68	23.93	22.58	39.36	21.18				234.9	117.3		Unique	4.86727	High	9.533e-05	0.0004748
High	[R].SGPPSPPSTATSFGGPRPR.[R]	1xTMT6plex [N-Term]; 1xPhospho [S5(100)]	146219843 1xPhospho [S1859(100)]	0.000533528	0.000323624	1	1	5	146219843	146219843 [1855-1873]	0	2162.06	S5(Phospho): 100	620.7	910.8	812.8	1025.7	796	701.7	684.5	959.7	1056.9	699.7	22.57	40.73	30.83	36.33	44.52	53.58	36.31	44.03	27.71	24.98		521.7	719.8				Unique	3.97048	High	0.0001849	0.0004788
High	[K].LPQSSSSESSPPSPQPTK.[V]	2xTMT6plex [N-Term; K18]; 1xPhospho [S/T]	118572613 1xPhospho [S424(100)]	0.000480602	0.000323624	1	2	9	118572613	118572613 [412-429]	0	2379.18	S13(Phospho): 100	469.6	297.5	192.2	289	430.1	256.9	196.7	357.5	368.6	220.9	5.92	32.61	12.06	24.81	22.12	1.93	20.72	3.71	1.61	11.02				489.2	449.9		Unique	4.39395	High	9.533e-05	0.0004591
High	[R].AQLGGPEAAKSDETAAK.[-]	3xTMT6plex [N-Term; K10; K17]; 1xPhospho [S11(100)]	4504517 1xPhospho [S199(100)]	0.000532072	0.000323624	1	1	22	4504517	4504517 [189-205]	1	2411.28	S11(Phospho): 100	17520.2	2612.9	13458.9	3541.2	2166.6	1946.9	4221.7	1490.9	1319.9	3187.3	1.65	4.46	1.71	0.35	5.23	3.31	2.71	2.89	3.81	3.58		17725.2	17315.2				Unique	5.41672	High	0.0002194	0.0004981
High	[R].QASIELPSMAVASTK.[S]	2xTMT6plex [N-Term; K15]; 1xPhospho [S3(100)]	339409180 1xPhospho [S380(100)]	0.000511705	0.000323624	1	3	6	339409180	339409180 [378-392]	0	2071.09	S3(Phospho): 100	1869.7	309.3	1942.2	452.8	528	982.4	287.4	1021.2	736.8	472.7	26.36	4.64	28.01	22.46	32.12	26.95	21.37	16.95	12.38	30.74							Unique	4.42433	High	9.533e-05	0.0004714
High	[R].IYISNTFSPSKAEGDSAGTAGTPGGTPAGDK.[V]	3xTMT6plex [N-Term; K11; K31]; 1xPhospho [S/T/Y]	148536864 1xPhospho [S203(94.4)]	0.000449952	0.000323624	1	3	9	148536864	148536864 [196-226]	1	3721.86	S8(Phospho): 99.11	286.8	157.4	148.9	196	121	171.1	130.3	238.5	215.4	164.6	39.18	45.27	40.79	48.22	30.19	45.05	2.81	59.33	41.16	46.82		207.3	366.2				Unique	3.61473	High	9.533e-05	0.0004445
High	[R].SGSAAQAEGLCK.[Q]	2xTMT6plex [N-Term; K12]; 1xCarbamidomethyl [C11]; 1xPhospho [S3(99.8)]	5031953 1xPhospho [S13(99.5)]	0.000450658	0.000323624	1	1	12	5031953	5031953 [11-22]	0	1716.84	S3(Phospho): 99.85	527.1	518.7	721.5	463.9	9356	491.9	508.9	412.5	779.4	490.7	24.97	21.73	2.67	2.65	2.51	26.34	1.78	25.3	1.78	11.04							Unique	5.10173	High	9.533e-05	0.0004451
High	[K].NNEESPTATVAEQGEDITSK.[K]	2xTMT6plex [N-Term; K20]; 1xPhospho [S5(100)]	4758384 1xPhospho [S13(100)]	0.000516792	0.000323624	1	2	2	4758384	4758384 [9-28]	0	2658.25	S5(Phospho): 100	332.9	263.8	312.2	387.6	232.6	326.1	444.5	704.5	398.7	339																332.9	Unique	4.69078	High	0.0002194	0.0005018
High	[R].SYDVPPPPMEPDHPFYSNISK.[D]	2xTMT6plex [N-Term; K21]; 1xPhospho [S1(100)]	4505753 1xPhospho [S118(100)]	0.000468417	0.000323624	1	3	16	4505753	4505753 [118-138]	0	2955.4	S1(Phospho): 100	448.8	331.9	353.5	472.1	401.6	833.7	347.1	576	1025.3	653.3	18.73	20.21	9.22	14.48	1.2	10.08	13.81	12.36	16.97	9.73		508.3	389.4				Unique	4.26937	High	9.533e-05	0.0004538
High	[R].IEEEEEVEQELLSHSWGR.[E]	1xTMT6plex [N-Term]; 1xPhospho [S15(100)]	578815065 1xPhospho [S653(100)]	0.00050082	0.000323624	1	2	1	578815065	578815065 [639-656]	0	2508.15	S15(Phospho): 100	97.9	110.8	94	89.1	74.9	92.8	70.9	76.5	57.3	87.7																97.9	Unique	4.82095	High	9.533e-05	0.0004674
High	[R].QQSTPQAANSPPNLGAK.[I]	2xTMT6plex [N-Term; K17]; 1xPhospho [S10(100)]	226442779 1xPhospho [S325(100)]	0.000518974	0.000323624	1	2	3	226442779	226442779 [316-332]	0	2247.15	S10(Phospho): 100	322.4	139.7	182.2	204.4	148.5	175.9	221.2	184	151.4	242.3	53.4	55.62	62.18	37.92	66.25	32.86	32.51	65.39	61.02	61.33		200.6	444.1				Unique	4.26079	High	9.533e-05	0.000474
High	[R].AALDGGVASAASPESKPSPGTK.[G]	3xTMT6plex [N-Term; K16; K22]; 1xPhospho [S/T]	530383409 1xPhospho [S483(99.6)]	0.000536439	0.000323624	1	3	6	530383409	530383409 [472-493]	0	2765.47	S12(Phospho): 99.65	158.1	108	178.3	161.5	121.2	153.3	218.6	140.6	249.4	174	23.97	35.27	0.18	8.03	50.51	37.08	15.51	40.96	19.28	19.42							Unique	3.42273	High	0.0001849	0.0004797
High	[K].TQTPPVSPAPQPTEER.[L]	1xTMT6plex [N-Term]; 2xPhospho [T3(100); S7(100)]	20357552 2xPhospho [T401(99.6); S405(100)]	0.000484201	0.000323624	1	4	49	20357552	20357552 [399-414]	0	2123.96	T3(Phospho): 100; S7(Phospho): 100	2871.5	2507.1	4366.8	2719.4	3521.8	3498	4379	2944.1	2787.7	4331.9	10.09	7.77	0.15	1.96	5.83	4.13	0.77	5.29	9.55	2.39		3076.4	2666.6				Unique	5.71153	High	0.0002194	0.0004954
High	[R].VVSDADDSDSDAVSDKSGKR.[E]	3xTMT6plex [N-Term; K16; K19]; 2xPhospho [S8(100); S14(99.5)]	530369278 2xPhospho [S425(100); S431(99.5)]	0.000470561	0.000323624	1	7	3	530369278	530369278 [418-437]	2	2900.35	S8(Phospho): 100; S14(Phospho): 99.5	223.2	316.3	377.3	544.3	407.5	587.6	286.4	326.3	581.3	358.9																223.2	Unique	4.7419	High	9.533e-05	0.0004548
High	[K].HEEQSNEDIPIAEQSSK.[D]	2xTMT6plex [N-Term; K17]; 1xPhospho [S5(100)]	213972636 1xPhospho [S227(100)]	0.000456317	0.000323624	1	5	1	213972636	213972636 [223-239]	0	2479.18	S5(Phospho): 100																											No Quan Values	4.8902	High	9.533e-05	0.0004479
High	[K].KESESEDSSDDEPLIK.[K]	3xTMT6plex [N-Term; K1; K16]; 1xPhospho [S]	1034651579 1xPhospho [S303(99.7)]	0.000527705	0.000323624	1	3	10	1034651579	1034651579 [299-314]	1	2575.26	S9(Phospho): 99.44	405.5	552.3	407.9	501.8	599.6	530.6	345.4	552.3	510.5	371.8	71.01	107.2	89.97	81.61	105.86	110.53	82.44	78.12	55.63	65.47				201.9		609.1	Unique	4.3049	High	0.0001849	0.0004768
High	[R].SPPPGPDGHAK.[K]	2xTMT6plex [N-Term; K11]; 1xPhospho [S1(100)]	16445428 1xPhospho [S391(100)]	0.000508799	0.000323624	1	6	4	16445428	16445428 [391-401]	0	1597.81	S1(Phospho): 100	228.2	332.8	326.1	175.1	186.9	204.4	154.2	290.3	222.6	196.2	46.28	41.71	60.32	53.45	66.77	61.9	65.88	53.19	67.7	44.52				302.9	153.5		Unique	4.54223	High	9.533e-05	0.0004704
High	[R].SRTASGSSVTSLDGTR.[S]	1xTMT6plex [N-Term]; 1xPhospho [T3(99.5)]	767952381 1xPhospho [T345(99.5)]	0.000527705	0.000323624	1	5	1	767952381	767952381 [343-358]	1	1890.91	T3(Phospho): 99.48	134.8	192.6	104.2	149.2	191.4	125.2	192.7	153.5	110.8	185.8																	Unique	5.397	High	0.0001849	0.0004768
High	[R].QEVNPVRQEIESETTSEEQIQEEK.[S]	2xTMT6plex [N-Term; K24]; 1xPhospho [T/S]		0.000497199	0.000323624	1	2	9	21361116	21361116 [2101-2124]	1	3397.64	T15(Phospho): 49.77; S16(Phospho): 49.77	74.3	314.8	72.2	136.4	70.9	195.2	356.8	161.5	239.4	88																74.3	Unique	4.76886	High	0.0002786	0.0005984
High	[K].YLAEDSNMSVPSEPSSPQSSTR.[T]	1xTMT6plex [N-Term]; 1xOxidation [M8(100)]; 1xPhospho [S16(100)]	1034652093 1xPhospho [S569(100)]	0.0004549	0.000323624	1	3	14	1034652093	1034652093 [554-575]	0	2694.18	M8(Oxidation): 100; S16(Phospho): 99.99	219.8	163.7	177.5	218.7	201.4	256.3	214.9	271.5	356.9	264.5	4.01	26	9.56	2.23	9.12	2.31	16.49	9.24	21.48	15.08				213.6	226		Unique	4.08772	High	9.533e-05	0.000459
High	[R].SASSDTSEELNSQDSPPK.[Q]	2xTMT6plex [N-Term; K18]; 1xPhospho [S3(99.7)]		0.000474141	0.000323624	1	1	29	4759140	4759140 [288-305]	0	2417.11	S3(Phospho): 98.85	1445.8	1054.2	1482.8	1289.1	1026.9	1161.9	809.5	881.7	1663.6	891.6																1445.8	Unique	5.51957	High	0.0002786	0.000574
High	[K].EASSPPPHPQLHSEEEIEPMEGPAPPVLIQLSPPNTDADTR.[E]	1xTMT6plex [N-Term]; 1xOxidation [M20(100)]; 2xPhospho [S32(100); S/T]	259906018 2xPhospho [S453(94.7); S/T]	0.000458446	0.000323624	1	3	13	259906018	259906018 [422-462]	0	4815.21	S3(Phospho): 49.63; S4(Phospho): 49.63; M20(Oxidation): 100; S32(Phospho): 100	276.7	112.4	210.4	154	99.2	102.2	141.9	169	140.5	119	87.1	74.46	109.66	74.24	106.49	105.68	83.56	99.89	88.31	111.92						40.2	Unique	4.27629	High	9.533e-05	0.0004489
High	[R].SPARTPPSEEDSAEAER.[L]	1xTMT6plex [N-Term]; 1xPhospho [T/S]	768003436 1xPhospho [T81(100)]	0.000459156	0.000323624	1	1	15	768003436	768003436 [77-93]	1	2137.96	T5(Phospho): 100	1004	1227.2	963.3	987.8	1792.5	774.9	787.8	1116.5	1545.4	680.9	9.34	18.3	2.67	17.59	15.85	14.72	23.1	30.34	16.84	10.58				937.7	1070.4		Unique	5.56076	High	9.533e-05	0.0004648
High	[R].SPAAGSSQSSGWPNDVDAGSPR.[A]	1xTMT6plex [N-Term]; 1xPhospho [S20(100)]	530414871 1xPhospho [S379(100)]	0.000491414	0.000323624	1	3	2	530414871	530414871 [360-381]	0	2439.08	S20(Phospho): 100	57.9	59.8	69.4	87.9	49.2	80.6	83.4	52.5	70.4	143.2	0.82	16.04	23.67	13.11	6.07	26.53	12.22	9.17	3.64	1.92				58.2	57.6		Unique	4.38283	High	9.533e-05	0.0004637
High	[R].LSPPSSSAASSYSFSDLNSTR.[G]	1xTMT6plex [N-Term]; 1xPhospho [S/Y/T]	4557553 1xPhospho [S60(99.4)]	0.000521156	0.000323624	1	1	5	4557553	4557553 [48-68]	0	2470.13	S13(Phospho): 100	145.9	92.4	81.7	113.2	84.1	102.8	101.8	118.3	72.5	86.8																	Unique	3.70901	High	9.533e-05	0.0004746
High	[K].ELVSSSSSGSDSDSEVDK.[K]	2xTMT6plex [N-Term; K18]; 1xPhospho [S4(99.7)]	1034643401 1xPhospho [S9(99.7)]	0.000499371	0.000323624	1	1	168	1034643401	1034643401 [6-23]	0	2353.07	S4(Phospho): 99.71	468	916.2	802.4	880.1	1330.8	1255.5	470	996.1	1528.5	384.5	72.76	74.58	57.08	67.4	73.92	55.62	56.22	86.32	72.34	72.31						163.2	Unique	5.12675	High	9.533e-05	0.0004734
High	[R].RPSADSESPGTPSPDGAAWEPPAR.[E]	1xTMT6plex [N-Term]; 1xPhospho [S3(100)]	21361458 1xPhospho [S142(100)]	0.000525522	0.000323624	1	1	4	21361458	21361458 [140-163]	0	2744.25	S3(Phospho): 100	145.5	128.3	44.6	57.5	258.4	185.3	67.4	143.5	184.4	85.3	60.71	21.67			7.87	0.18	50.61	76.67	14.51	44.34							Unique	4.34466	High	0.0002194	0.0005111
High	[R].AGGASPAASSTAQPPTQHR.[L]	1xTMT6plex [N-Term]; 1xPhospho [S5(100)]	24308115 1xPhospho [S453(100)]	0.000447836	0.000323624	1	1	5	24308115	24308115 [449-467]	0	2101	S5(Phospho): 100	202.8	195	358.6	196.6	413.2	202.3	213.4	261.6	191.4	180.4	3.03	38.69	13.85	7.76	11.69	53.89	51.37	14.62	27.17	12							Unique	3.9849	High	0.0002194	0.000498
High	[K].IQPLEPDSPTGLSENPTPATEK.[L]	2xTMT6plex [N-Term; K22]; 1xPhospho [S8(99.6)]	50345873 1xPhospho [S1003(99.6)]	0.000492859	0.000323624	1	2	14	50345873	50345873 [996-1017]	0	2859.44	S8(Phospho): 99.62	432.6	383.2	477.4	434.4	318.4	414.7	208.3	438.8	409.9	559.4	6.65	4.38	27.26	46.08	10.26	22.2	60.22	24.49	19.87	41.88							Unique	3.69016	High	9.533e-05	0.0004644
High	[K].MLAESDESGDEESVSQTDK.[T]	2xTMT6plex [N-Term; K19]; 2xPhospho [S5(100); S8(99.4)]	4505531 2xPhospho [S190(100); S193(100)]	0.000508799	0.000323624	1	1	13	4505531	4505531 [186-204]	0	2675.11	S5(Phospho): 100; S8(Phospho): 100	1757.4	487.2	1429.3	971.5	645.1	1497.6	1034.2	1119.1	926.1	1112.2																1757.4	Unique	5.10154	High	9.533e-05	0.0004705
High	[R].NESEDNKFSDDSDDDFVQPR.[K]	2xTMT6plex [N-Term; K7]; 1xPhospho [S]	47419911 1xPhospho [S1028(99.4)]	0.000491414	0.000323624	1	2	3	47419911	47419911 [1017-1036]	1	2897.25	S12(Phospho): 99.44	236.9	257.9	742.7	617.5	570	248.8	468.3	262.2	479.4	271.2																236.9	Unique	4.85417	High	9.533e-05	0.0004636
High	[K].EMSSDSEYDSDDDRTKEER.[A]	2xTMT6plex [N-Term; K16]; 1xPhospho [S10(99.6)]	84043963 1xPhospho [S595(100)]	0.000478446	0.000323624	1	1	4	84043963	84043963 [586-604]	2	2832.19	S10(Phospho): 99.58	70	146.6	94.3	140.4	139.6	173.7	101.7	174.3	214.2	118.1	46.72	9.5	25.86	7.82	13.55	11.12	6.1	2.08	4.69	3.3				93.2	46.9		Unique	3.91443	High	9.533e-05	0.0004584
High	[R].VENMDISDEEEGGAPPPGSPQVLEEDEAELELQK.[Q]	2xTMT6plex [N-Term; K34]; 1xPhospho [S19(100)]	10863889 1xPhospho [S486(100)]	0.000484921	0.000323624	1	3	1	10863889	10863889 [468-501]	0	4218.96	S19(Phospho): 100																											No Quan Values	3.73378	High	9.533e-05	0.000461
High	[R].KASSDLDQASVSPSEEENSESSSESEK.[T]	3xTMT6plex [N-Term; K1; K27]; 1xPhospho [S]		0.000480602	0.000323624	1	5	6	768004469	768004469 [196-222]	1	3610.67	S22(Phospho): 98.69	34.1	93.9	34.4	62.8	29.7	34.1	31.8	67.7	65.4	28.1																34.1	Unique	3.73941	High	9.533e-05	0.0004592
High	[R].SKLPDGPTGSSEEEEEFLEIPPFNK.[Q]	3xTMT6plex [N-Term; K2; K25]; 1xPhospho [S10(100)]	213972636 1xPhospho [S1763(100)]	0.000454192	0.000323624	1	5	5	213972636	213972636 [1754-1778]	1	3543.78	S10(Phospho): 100	140.9	125.8	135.2	176.5	136	147.4	87.4	111.7	147.1	143.3																140.9	Unique	4.71552	High	9.533e-05	0.000447
High	[K].STGSPTQETQAPFIAK.[R]	2xTMT6plex [N-Term; K16]; 1xPhospho [S4(99.6)]		0.000510978	0.000323624	1	15	64	1034675223	1034675223 [203-218]	0	2201.13	S4(Phospho): 99.77	1667.4	3788.6	7180.8	4129.3	1480.9	672.5	10586.9	497.9	1773.4	1752	144.54	141.16	145.41	143.74	146.76	121.06	145.22	99.17	132.89	133.36				460.1	315.6	114	Unique	5.40499	High	9.533e-05	0.000471
High	[R].RDDIEDGDSMISSATSDTGSAK.[R]	2xTMT6plex [N-Term; K22]; 1xOxidation [M10(100)]; 1xPhospho [S20(100)]	1034634210 1xPhospho [S539(100)]	0.000459156	0.000323624	1	30	1	1034634210	1034634210 [520-541]	1	2812.26	M10(Oxidation): 100; S20(Phospho): 100	70	221.4	108.8	120.3	173.4	140.5	88.2	121.4	201	151.5																70	Unique	4.87504	High	9.533e-05	0.0004493
High	[K].GNKSPSPPDGSPAATPEIR.[V]	2xTMT6plex [N-Term; K3]; 1xPhospho [S6(100)]	530369146 1xPhospho [S313(100)]	0.00051752	0.000323624	1	39	4	530369146	530369146 [308-326]	1	2416.23	S6(Phospho): 100	250.8	239	138.6	295.3	295.8	303	315.6	480.3	366	141.9	14.44	8.38	16.41	28.45	55.71	17.5	19.06	47.49	19.51	21.22		276.4	225.2				Unique	3.73114	High	9.533e-05	0.0004734
High	[R].SHSPSSPDPDTPSPVGDSR.[A]	1xTMT6plex [N-Term]; 1xPhospho [S3(99.6)]	485836756 1xPhospho [S724(99.2)]	0.000540077	0.000323624	1	2	10	485836756	485836756 [722-740]	0	2230.98	S3(Phospho): 100	188.4	235.5	365.6	205.1	307.3	224.1	180.8	198.5	256.2	111.2	5.86	22.43	16.84	30.3	15.65	3.63	31.74	25.57	5.3	25.74				180.6	196.2		Unique	4.2129	High	0.0002194	0.0004951
High	[R].SPHQLLSPSSFSPSATPSQK.[Y]	2xTMT6plex [N-Term; K20]; 1xPhospho [S1(100)]	20127448 1xPhospho [S141(100)]	0.000474141	0.000323624	1	5	5	20127448	20127448 [141-160]	0	2621.34	S1(Phospho): 100	171.8	222.7	389.1	190.1	263.1	174	181.1	146.1	250.2	253.4	9.3	13.58	11.52	20.61	26.01	19.2	18.67	3.75	3.27	4.22		160.5	183.1				Unique	3.94506	High	9.533e-05	0.0004565
High	[K].KEDSCQLGYSAGPCMGMTSR.[Y]	2xTMT6plex [N-Term; K1]; 2xCarbamidomethyl [C5; C14]; 1xPhospho [S10(97.5)]	4502067 1xPhospho [S236(98.6)]	0.000492136	0.000323624	1	1	10	4502067	4502067 [227-246]	1	2773.22	S10(Phospho): 99.39	689.6	838.8	272.2	495.8	392	260.4	61.1	103.5	194.1	224.8	1.2	4.62	0.07	7.31	3.19	7.41	25.65	0.21	5.84	4.18							Unique	3.93093	High	9.533e-05	0.0004639
High	[R].APQAGAHTPLTPQPGLAPQQQSPK.[Q]	2xTMT6plex [N-Term; K24]; 1xPhospho [S22(100)]	530417641 1xPhospho [S723(99.4)]	0.000468417	0.000323624	1	3	4	530417641	530417641 [702-725]	0	2958.56	S22(Phospho): 100	94.4	138	139.9	126.3	222.9	235.8	180.1	255	216.6	98.1		49.75	51.22	45.71	21.2	17.4	40.43	40.83	36.06	65.24							Unique	4.48891	High	9.533e-05	0.0004539
High	[R].ALVEFESNPEETREPGSPPSVQR.[A]	1xTMT6plex [N-Term]; 1xPhospho [T12(98.7)]	13129104 1xPhospho [S47(100)]	0.0004549	0.000323624	1	1	3	13129104	13129104 [31-53]	1	2864.37	S17(Phospho): 99.99																											No Quan Values	4.26245	High	9.533e-05	0.0004473
High	[R].ELAGNSSTPPPVSPGR.[G]	1xTMT6plex [N-Term]; 1xPhospho [S13(100)]	21040334 1xPhospho [S381(100)]	0.000524067	0.000323624	1	4	7	21040334	21040334 [369-384]	0	1874.92	S13(Phospho): 100	388.4	234.9	316.2	486.2	358	622.7	445	332.9	418.3	361.9	17.72	7.81	28.91	14.76	20.82	12.23	18.94	7.66	9.59	13.5				339.7	437.1		Unique	3.74063	High	0.0001849	0.0004758
High	[K].IEDVGSDEEDDSGK.[D]	2xTMT6plex [N-Term; K14]; 1xPhospho [S6(100)]	20149594 1xPhospho [S255(100)]	0.000477728	0.000323624	1	3	11	20149594	20149594 [250-263]	0	2032.9	S6(Phospho): 100	3327.5	1424.3	2170	2719.3	1582	2837.6	3334.4	2166.2	5444.9	4476.7																3327.5	Unique	5.52633	High	9.533e-05	0.0004579
High	[R].DSQDASAEQSDHDDEVASLASASGGFGTK.[V]	2xTMT6plex [N-Term; K29]; 1xPhospho [S/T]	45827771 1xPhospho [S879(98.4)]	0.000516065	0.000323624	1	1	13	45827771	45827771 [870-898]	0	3420.51	S10(Phospho): 100	370.7	307.1	431.4	369.9	504.6	323.8	325.1	378.6	529.9	403.3	6.54	11.33	9.18	28.72	4.17	10.03	25.77	3.52	2.01	3.46		387.9	353.6				Unique	4.12942	High	9.533e-05	0.000473
High	[K].IEDVGSDEEDDSGKDKK.[K]	4xTMT6plex [N-Term; K14; K16; K17]; 1xPhospho [S6(100)]	20149594 1xPhospho [S255(100)]	0.000464136	0.000323624	1	3	213	20149594	20149594 [250-266]	2	2862.44	S6(Phospho): 100	36292.8	21704.1	35358.9	70455.2	19380.6	57260.7	48735.3	54310.5	76080.2	104892	79.27	78.65	78.95	78.74	80.16	79.5	77.84	79.16	76.11	75.35							Unique	5.12889	High	0.0002194	0.0005273
High	[R].QQQQQQGEDGSPQAHR.[R]	1xTMT6plex [N-Term]; 1xPhospho [S11(100)]	21322252 1xPhospho [S96(100)]	0.000500095	0.000323624	1	1	2	21322252	21322252 [86-101]	0	2130.95	S11(Phospho): 100			64.2		18.8		19.1						55.69														Unique	3.98583	High	0.0001849	0.0004758
High	[R].TWDDDSDPESETDPDAQAK.[A]	2xTMT6plex [N-Term; K19]; 1xPhospho [S6(100)]	124248558 1xPhospho [S18(100)]	0.000462	0.000323624	1	1	4	124248558	124248558 [13-31]	0	2660.13	S6(Phospho): 100	590.2	178	647.5	715.1	301.7	390.9	352.5	347.2	249.5	411.5																590.2	Unique	5.19042	High	9.533e-05	0.0004506
High	[R].GDREEEVERPVSSPGDPEQK.[K]	2xTMT6plex [N-Term; K20]; 1xPhospho [S]		0.000520429	0.000323624	1	5	14	1034598889	1034598889 [2433-2452]	1	2778.33	S12(Phospho): 50; S13(Phospho): 50	541.4	483.8	722.1	429.4	354	638.7	523.4	448.4	440.8	855.2	44.05	24.91	17.74	0.64	19.84	19.65	28.28	16.66	11.9	8.12				372.8	710		Unique	4.19509	High	9.533e-05	0.0004745
High	[R].TDSREDEISPPPPNPVVK.[G]	2xTMT6plex [N-Term; K18]; 2xPhospho [S9(100); S/T]	47132583 2xPhospho [S83(100); S/T]	0.000497923	0.000323624	1	2	13	47132583	47132583 [75-92]	1	2595.25	S3(Phospho): 99.69; S9(Phospho): 100	914.5	514.4	1402.9	438.5	311.1	975.7	462.5	840.6	1034.3	2025.2	20.8	0.93	2.41	34.13	0.77	37.21	38.65	29.66	49.3	22.82							Unique	5.0604	High	9.533e-05	0.0004662
High	[R].QSLGHGQHGSGSGQSPSPSR.[G]	1xTMT6plex [N-Term]; 1xPhospho [S17(98.5)]	57864582 1xPhospho [S1008(98.5)]; 1xPhospho [S2469(98.5)]; 1xPhospho [S4400(98.5)]; 1xPhospho [S6801(98.5)]	0.000495028	0.000323624	1	1	3	57864582	57864582 [992-1011]; [1462-1481]; [1932-1951]; [2402-2421]	0	2257.03	S17(Phospho): 98.48	8.7	10.8	7.4	9.1	26	15.4	21.8	6.4	26.1	8	106.82		74.26		115.38	111.45		84.95	88.81	86.01							Unique	3.94179	High	9.533e-05	0.0004651
High	[K].ALSSAVQASPTSPGGSPSSPSSGQR.[S]	1xTMT6plex [N-Term]; 2xPhospho [T/S]		0.00050517	0.000323624	1	7	13	767970167	767970167 [3536-3560]	0	2689.21	T11(Phospho): 49.86; S12(Phospho): 49.86; S18(Phospho): 49.86; S19(Phospho): 49.86	140.3	117.4	302.5	285	183.1		130.1	215.2	230.1	558				68.69				17.51	19.62								Unique	3.16723	High	0.0002194	0.0004994
High	[R].SAMDSPVPASMFAPEPSSPGAAR.[A]	1xTMT6plex [N-Term]; 1xPhospho [S18(100)]		0.000447132	0.000323624	1	4	6	1034629940	1034629940 [8-30]	0	2569.17	S18(Phospho): 100	168.9	73.1	141.9	102.8	94.9	144.2	112.1	156.1	116.9	148.6		19.08	29.58	55.42	43.92		41.43		40.3	63.9				168.9			Unique	3.858	High	9.533e-05	0.0004433
High	[R].TPGVLLPGAGGAAGFGMTSPPPPTSPSR.[T]	1xTMT6plex [N-Term]; 1xOxidation [M17(100)]; 1xPhospho [T/S]		0.000508799	0.000323624	1	1	32	331284125	331284125 [297-324]	0	2902.44	M17(Oxidation): 100; T24(Phospho): 49.77; S25(Phospho): 49.77	463.6	304.3	265.9	365.6	296	430.5	178.9	336.6	385.1	403.2	29.01	41.05	34.07	4.49	56.26	38.06	39.64	33.03	37.71	30.15							Unique	4.37294	High	0.0001849	0.0004786
High	[R].LLESSLSSSEGEEPVEYK.[S]	2xTMT6plex [N-Term; K18]; 1xPhospho [S/Y]	1017029567 1xPhospho [S127(99.3)]	0.000458446	0.000323624	1	1	14	1017029567	1017029567 [120-137]	0	2521.24	S8(Phospho): 99.65	1016.9	575.5	537.1	525.2	368	1269.6	416	651.6	914.2	548.9	28.04	26.35	30.64	0.83	39.8	1.17	13.87	33.17	12.44	16.71							Unique	4.12761	High	9.533e-05	0.000449
High	[R].SSTATPGVTSGPSASGTPPSEGGGGSFPR.[I]	1xTMT6plex [N-Term]; 1xPhospho [S20(99)]		0.000449952	0.000323624	1	3	11	4758532	4758532 [736-764]	0	2899.33	S20(Phospho): 98.96	107.2	44.7	60.4	58.6	107.8	68.8	78.6	81.3	114.5	105.1	49.12	57.54	79.7	14.92	27.58	68.34	60.11	63.98	25.96	93.91			67.3	167	87.4		Unique	3.78067	High	9.533e-05	0.0004448
High	[K].AASADSTTEGTPADGFTVLSTK.[S]	2xTMT6plex [N-Term; K22]; 1xPhospho [S/T]		0.00045207	0.000323624	1	14	27	93141018	93141018 [168-189]	0	2665.3	S6(Phospho): 99.67	247.3	188.8	216.3	245.3	186.6	199.5	187	316.4	259.6	227	74.26	72.47	68	65.93	54.23	68.72	49.97	65.95	64.75	56.25		412.4	279.9				Unique	4.04209	High	9.533e-05	0.0004459
High	[K].SVSTPSEAGSQDSGDGAVGSR.[RT]	1xTMT6plex [N-Term]; 1xPhospho [S/T]	1003701575 1xPhospho [T89(99)]	0.000534256	0.000323624	1	6	17	1003701575	1003701575 [86-106]	0	2259.99	S13(Phospho): 99.56	292.1	307.7	273.3	305	333.6	338.2	303.3	354	320.2	391.3	58.7	86.34	80.42	91.75	91.88	78.86	75.15	89.44	93.3	71.5				170.8		413.3	Unique	5.04488	High	0.0002194	0.000496
High	[R].QDDGSSSASPSVQGAPR.[E]	1xTMT6plex [N-Term]; 1xPhospho [S9(100)]	1034699428 1xPhospho [S332(100)]	0.0004549	0.000323624	1	4	9	1034699428	1034699428 [324-340]	0	1954.87	S9(Phospho): 100	155.2	134.8	190.4	62.3	152.8	116.9	361.4	135.8	108.6	214	10.97	2.48	30.19	50.09	25.08	18.28	33.76	4.52	37.65	28		167.2	143.1				Unique	4.08408	High	9.533e-05	0.0004473
High	[R].SQSLPNSLDYTQTSDPGR.[H]	1xTMT6plex [N-Term]; 1xPhospho [S3(99.6)]	1021589337 1xPhospho [S46(99.6)]	0.000477728	0.000323624	1	2	32	1021589337	1021589337 [44-61]	0	2275.04	S3(Phospho): 100	2489.2	1358.2	1362.2	1294.3	1310.9	2060.5	1478.7	1471.3	1909.1	1074	20.42	0.91	12.37	14.21	1.31	16.06	6.5	1.47	6.75	5.72				2129.7	2848.7		Unique	5.64955	High	0.0002784	0.0005423
High	[K].DNQESSDAELSSSEYIK.[T]	2xTMT6plex [N-Term; K17]; 1xPhospho [S6(100)]	255918139 1xPhospho [S627(100)]	0.000479165	0.000323624	1	1	4	255918139	255918139 [622-638]	0	2440.12	S6(Phospho): 100	248.8	229.8	305.1	233	273	139.9	235	232.5	285.6	256.6																248.8	Unique	5.21278	High	9.533e-05	0.0004586
High	[R].AMDNHSDSEEELAAFCPQLDDSTVAR.[E]	1xTMT6plex [N-Term]; 1xCarbamidomethyl [C16]; 1xOxidation [M2(100)]; 2xPhospho [S6(100); S8(100)]	30023820 2xPhospho [S258(100); S260(100)]	0.000469846	0.000323624	1	2	1	30023820	30023820 [253-278]	0	3313.33	M2(Oxidation): 100; S6(Phospho): 100; S8(Phospho): 100	146.6	85.8	126.1	141.3	138.3	116	103.2	153.6	138.5	93.3																146.6	Unique	5.07726	High	9.533e-05	0.0004544
High	[R].RSPTDSDVSLDSEDSGAK.[S]	2xTMT6plex [N-Term; K18]; 1xPhospho [S2(100)]	1034643474 1xPhospho [S1098(100)]	0.000512431	0.000323624	1	2	2	1034643474	1034643474 [1097-1114]	1	2404.13	S2(Phospho): 100	46.8	415.9	183.5	385.2	115.8	180.9	107.5	299	247.5	104.3																46.8	Unique	6.1424	High	9.533e-05	0.0004717
High	[R].LPALGEAHVSPEVATADK.[A]	2xTMT6plex [N-Term; K18]; 1xPhospho [S10(100)]	557440888 1xPhospho [S1229(100)]	0.000516065	0.000323624	1	8	2	557440888	557440888 [1220-1237]	0	2343.24	S10(Phospho): 100	189.2	226.9	225.3	242.9	267.5	222.1	208.2	246.8	226.2	278.5																189.2	Unique	4.26908	High	9.533e-05	0.0004728
High	[K].TEEPASDKGSEAEAHMPPPFTPYVPR.[I]	2xTMT6plex [N-Term; K8]; 2xPhospho [S6(100); S10(100)]	270288733 2xPhospho [S735(100); S739(100)]	0.000541532	0.000323624	1	5	2	270288733	270288733 [730-755]	1	3458.58	S6(Phospho): 100; S10(Phospho): 100	117.3	78.9	96.3	80.7	182.9	106.1	92.7	118.1	85.3	110.2																117.3	Unique	4.26438	High	0.0001849	0.0004812
High	[R].GHTASESDEQQWPEEK.[R]	2xTMT6plex [N-Term; K16]; 1xPhospho [S5(99.8)]	1034584020 1xPhospho [S1257(99.8)]	0.000495751	0.000323624	1	7	5	1034584020	1034584020 [1253-1268]	0	2396.08	S5(Phospho): 99.78	110.3	213.6	262.9	93.2	252	98.7	104.3	141.6	171.1	140.7	28.01	89.58	107.97	63.37	64.18	52.23	93.85	33.98	55.28	46.89						88.4	Unique	5.49891	High	9.533e-05	0.0004655
High	[R].QLSTEQAVLQESLEK.[E]	2xTMT6plex [N-Term; K15]; 1xPhospho [S3(99.8)]	767951060 1xPhospho [S1213(99.8)]	0.00050227	0.000323624	1	7	2	767951060	767951060 [1211-1225]	0	2241.18	S3(Phospho): 99.8	305.7	211.4	289	72.5	131.2	222.7	53	194.7	103.4	186																	Unique	4.58797	High	9.533e-05	0.000468
High	[K].EGEETEGSEEDDKENDKTEEMPNDSVLENK.[S]	4xTMT6plex [N-Term; K13; K17; K30]; 1xOxidation [M21(100)]; 1xPhospho [S8(99.2)]	27262628 1xPhospho [S480(100)]	0.000487083	0.000323624	1	4	5	27262628	27262628 [473-502]	2	4439.03	S8(Phospho): 99.97; M21(Oxidation): 100	3800.5	1327.8	1509.5	3126.7	1499.9	1833	2246.6	3757	1554.6	795.4																3800.5	Unique	6.53654	High	9.533e-05	0.0004619
High	[R].LAGGQTSQPTTPLTSPQR.[E]	1xTMT6plex [N-Term]; 1xPhospho [T11(98.4)]		0.000487083	0.000323624	1	5	6	530360483	530360483 [17-34]	0	2149.09	T14(Phospho): 50; S15(Phospho): 50	552.4	433.1	689.8	687.1	471.2	853.2	589	708.7	648.8	926.4																552.4	Unique	4.5995	High	9.533e-05	0.0004618
High	[K].APAGQEEPGTPPSSPLSAEQLDR.[I]	1xTMT6plex [N-Term]; 1xPhospho [T10(100)]	19718751 1xPhospho [T60(100)]	0.000466989	0.000323624	1	2	5	19718751	19718751 [51-73]	0	2643.25	T10(Phospho): 100	123.4	128.6	138.9	123.1	176.6	237.9	134.6	129.6	230.2	215.5	10.76	40.34	43.99	34.49	55.5	50.96	40.36	48.03	53.39	42.76						124.9	Unique	3.72967	High	9.533e-05	0.0004531
High	[K].FSGEEGEIEDDESGTENREEK.[D]	2xTMT6plex [N-Term; K21]; 1xPhospho [S13(99.6)]	1009287565 1xPhospho [S939(99.6)]	0.000449952	0.000323624	1	3	4	1009287565	1009287565 [927-947]	1	2924.27	S13(Phospho): 99.6	813.4	338.9	908.9	722.8	488.4	466.9	471	729.1	556.2	398.3																813.4	Unique	5.17745	High	9.533e-05	0.0004446
High	[K].AESSNSSSSDDSSEEEEEKLK.[G]	3xTMT6plex [N-Term; K19; K21]; 2xPhospho [S3(100); S12(100)]	530394600 2xPhospho [S527(100); S536(100)]	0.000447836	0.000323624	1	4	31	530394600	530394600 [525-545]	1	3121.36	S3(Phospho): 100; S4(Phospho): 100	504.4	1013.9	747.4	1439.6	1434.6	1492.2	550.4	1672.9	1211.3	688.9	75.39	114.6	32.38	76.28	79.75	76.61	79.77	77.17	68.05	50.14						773.2	Unique	5.08915	High	0.0002194	0.0004956
High	[K].VAPGPSSGSTPGQVPGSSALSSPR.[R]	1xTMT6plex [N-Term]; 1xPhospho [S/T]		0.000518247	0.000323624	1	13	5	267844811	267844811 [1361-1384]	0	2489.22	S21(Phospho): 50; S22(Phospho): 50	231.8	298.7	266	104.9	113.9	149.7	250.2	151.8	156.8	508.7	24.55	50.21	7.19	6.98	11.8	32.71	1.1	7.5	19.94	5.59		272	191.5				Unique	4.38714	High	9.533e-05	0.0004737
High	[K].ASESSSSEESSDDDDEEDQKK.[Q]	3xTMT6plex [N-Term; K20; K21]; 2xPhospho [S4(99.5); S5(99.5)]	530394600 2xPhospho [S127(99.5); S128(99.5)]	0.000454192	0.000323624	1	4	2	530394600	530394600 [124-144]	1	3151.3	S4(Phospho): 99.5; S5(Phospho): 99.5	51.1	195.2	65.9	113.5	362.6	103.6	83.9	121.7	123	60.4																51.1	Unique	4.51789	High	9.533e-05	0.000447
High	[R].SSSPTSSLTQPIEMPTLSSSPTEERPTVGPGQQDNPLLK.[T]	2xTMT6plex [N-Term; K39]; 1xPhospho [S20(95.3)]	38372909 1xPhospho [S744(95.3)]	0.000527705	0.000323624	1	5	5	38372909	38372909 [725-763]	0	4632.32	S20(Phospho): 95.31	73.8	43.9	113.4	165.4	52.9	76.3	85.7	136.9	75.7	89.1																73.8	Unique	5.18865	High	0.0001849	0.0004769
High	[K].STSAPQMSPGSSDNQSSSPQPAQQK.[L]	2xTMT6plex [N-Term; K25]; 1xOxidation [M7(100)]; 1xPhospho [S/T]		0.000462	0.000323624	1	20	212	530365733	530365733 [471-495]	0	3086.41	M7(Oxidation): 100; S11(Phospho): 20; S12(Phospho): 20; S16(Phospho): 20; S17(Phospho): 20; S18(Phospho): 20	257.9	198.9	295.1	234	248.6	241.2	425.5	308.9	334.1	343	49.38	43.68	62.09	68.81	98.57	63.18	76.81	51.65	71.94	53.24			54.7	372.8	347.6	222.8	Unique	3.68651	High	0.0002786	0.0005896
High	[R].ETEEQDSDSAEQGDPAGEGK.[E]	2xTMT6plex [N-Term; K20]; 1xPhospho [S/T]	48255913 1xPhospho [S60(99.6)]	0.000498647	0.000323624	1	1	22	48255913	48255913 [54-73]	0	2617.12	S7(Phospho): 100	1063.3	1113.2	1889.5	1859.3	289.5	4202.2	808.1	1697.1	1819.7	3189.2	21.67	2.05	44.99	9.13	58.37	13.53	54.3	16.31	16.36	44.03							Unique	3.62154	High	9.533e-05	0.0004666
High	[R].SHNNFVAILDLPEGEHQYK.[F]	2xTMT6plex [N-Term; K19]; 1xPhospho [S1(100)]	19923359 1xPhospho [S108(100)]	0.000486362	0.000323624	1	1	7	19923359	19923359 [108-126]	0	2749.38	S1(Phospho): 100	584.2	154.3	217.5	248.5	256.3	317.6	457.2	182.9	290	235.9		122.41	120.2	116.92	118.02	113.81		121.3	119.05	119.86					584.2		Unique	4.14399	High	9.533e-05	0.0004617
High	[R].MGQAPSQSLLPPAQDQPRSPVPSAFSDQSR.[C]	1xTMT6plex [N-Term]; 1xOxidation [M1(100)]; 1xPhospho [S]		0.000512431	0.000323624	1	2	12	118572613	118572613 [2431-2460]	1	3504.68	M1(Oxidation): 100; S19(Phospho): 99.99	331.8	133.1	359.6	380.8	299.7	211.7	264.7	356.1	465.1	409.3	6.29	49.85	6.03	22.74	57.9	44.03	21.72	0.5	26.31	10.67							Unique	4.22964	High	0.0002194	0.0004999
High	[R].MGQAPSQSLLPPAQDQPRSPVPSAFSDQSR.[C]	1xTMT6plex [N-Term]; 1xPhospho [S19(100)]	118572613 1xPhospho [S2449(100)]	0.000487805	0.000323624	1	2	6	118572613	118572613 [2431-2460]	1	3488.68	S19(Phospho): 99.1	319.1	220.1	383.3	395.3	260.8	313	243.2	384	363.6	479.9	49.27	40.36	21.64	54	33.58	6.08	29.71	2.97	38.04	35.5							Unique	3.73275	High	0.0002194	0.0005114
High	[R].SPAPGSPDEEGGAEAPAAGIR.[F]	1xTMT6plex [N-Term]; 1xPhospho [S6(100)]	112382237 1xPhospho [S1049(100)]	0.000533528	0.000323624	1	3	1	112382237	112382237 [1044-1064]	0	2245.03	S6(Phospho): 100	212.3	288.1	158	206.7	288.5	268.1	171.4	222.5	209.6	240																212.3	Unique	4.60112	High	0.0001849	0.0004789
High	[K].LPASPSGSEDLSSVSSSPTSSPK.[T]	2xTMT6plex [N-Term; K23]; 1xPhospho [S/T]	767918811 1xPhospho [S536(100)]	0.000507347	0.000323624	1	17	13	767918811	767918811 [520-542]	0	2742.35	S17(Phospho): 99.99	54.4	41.4	41.9	37.5	62.9	61	48.5	58.1	69.5	65.1		7.98	42.04	35.81	41.87	7.02	39.35	1.21	8.39	44.43				54.4			Unique	4.03429	High	9.533e-05	0.0004698
High	[R].ILGSASPEEEQEKPILDRPTR.[I]	2xTMT6plex [N-Term; K13]; 1xPhospho [S6(99.2)]	167736389 1xPhospho [S107(99.5)]	0.000502995	0.000323624	1	2	5	167736389	167736389 [102-122]	0	2903.53	S6(Phospho): 99.6	235.7	182.7	366.5	298.9	189	330	185.2	142.9	272.5	280.5	65.93	66.07	47.83	61.32	72.88	65.36	68.31	77.51	44.29	88.7				345.6	125.8		Unique	3.9825	High	9.533e-05	0.0004682
High	[R].LKSVEDEMDSPGEEPFYTGQGR.[S]	2xTMT6plex [N-Term; K2]; 1xOxidation [M8(100)]; 2xPhospho [S3(100); S10(100)]	224465184 2xPhospho [S325(100); S332(100)]	0.000526978	0.000323624	1	9	2	224465184	224465184 [323-344]	1	3105.36	S3(Phospho): 100; M8(Oxidation): 100; S10(Phospho): 100	258.7	182.6	356.8	253.3	194.4	240.8	808	304.1	252.9	449.4																258.7	Unique	5.60063	High	0.0001849	0.0004765
High	[K].SDDGLSTASSPEPGTSDLVGSASSALK.[S]	2xTMT6plex [N-Term; K27]; 1xPhospho [S10(99.6)]	20336305 1xPhospho [S447(99.6)]	0.000541532	0.000323624	1	9	13	20336305	20336305 [438-464]	0	3074.48	S10(Phospho): 99.62	457.8	213.4	243.1	237.9	185.7	169.9	118.2	173.2	216.1	177.4	42.3	52	46.23	51.94	30.39	57.58	36.72	28.17	60.18	43.68							Unique	3.31213	High	0.0002194	0.0005087
High	[K].VEAIVISDEETDVSDEQPQGPER.[A]	1xTMT6plex [N-Term]; 1xPhospho [S7(100)]	13376146 1xPhospho [S362(100)]	0.000521884	0.000323624	1	2	1	13376146	13376146 [356-378]	0	2851.31	S7(Phospho): 100	108.8	72	97.4	119.1	88.1	97.4	89.4	95.6	103.2	145.3																108.8	Unique	3.93847	High	9.533e-05	0.0004749
High	[K].GPPDFSSDEEREPTPVLGSGAAAAGR.[S]	1xTMT6plex [N-Term]; 2xPhospho [T14(100); S]	808175976 2xPhospho [T74(100); S]; 4507555 2xPhospho [T74(100); S]	0.000508073	0.000323624	2	5	2	808175976; 4507555	808175976 [61-86]; 4507555 [61-86]	1	2959.31	S6(Phospho): 50; S7(Phospho): 50; T14(Phospho): 100	287.5	144	255.1	237.6	135.3	418.8	687	156.3	204.4	616.1																287.5	Not Unique	5.26888	High	9.533e-05	0.0004702
High	[K].FSAVLVEPPPMSLPGAGLSSQELSGGPGDGP.[-]	1xTMT6plex [N-Term]; 1xOxidation [M11(100)]; 1xPhospho [S]		0.000454192	0.000323624	1	1	28	5032179	5032179 [805-835]	0	3275.57	M11(Oxidation): 100; S24(Phospho): 96.99	214.6	134.2	237.6	227.8	194	78.4	254.7	180.8	163.6	299.3	88.29	123.66	76.25	70.41	88.72	47.36	86.03	67.84	72.3	91.84		60.2	88.4				Unique	3.52288	High	9.533e-05	0.0004467
High	[K].DWEDDSDEDMSNFDR.[F]	1xTMT6plex [N-Term]; 1xPhospho [S6(100)]	530399615 1xPhospho [S117(100)]; 767972870 1xPhospho [S117(100)]	0.000508799	0.000323624	2	8	169	530399615; 767972870	530399615 [112-126]; 767972870 [112-126]	0	2184.79	S6(Phospho): 100	8297.3	5088.4	7365.5	6744.5	8231.8	5577.1	5550.3	6333.6	6024.3	8407.2	78.5	80.21	79.34	80.49	80.84	80.09	80.05	79.74	79.29	80.26		11895.6	12217.7	778.5			Not Unique	4.66194	High	9.533e-05	0.0004703
High	[R].VTDSESGDSSGEDPEGNK.[G]	2xTMT6plex [N-Term; K18]; 1xPhospho [S/T]	768007571 1xPhospho [S1389(99.5)]	0.000457736	0.000323624	1	12	8	768007571	768007571 [1380-1397]	0	2348.02	S9(Phospho): 99.65	777	1173.8	462	603	825.6	687.5	400.9	844.1	804.9	404.2																777	Unique	4.64053	High	9.533e-05	0.0004485
High	[R].GFGDGYNGYGGGPGGGNFGGSPGYGGGR.[G]	1xTMT6plex [N-Term]; 1xPhospho [S21(100)]	530384720 1xPhospho [S259(100)]	0.000462	0.000323624	1	2	2	530384720	530384720 [239-266]	0	2804.17	S21(Phospho): 100	67.9	41.2	74.4	55.8	70.1	87.1	102.8	50.1	110.6	86.4		38.56	39.44	21.08	1.22	14.48	5.49	12.99	18.19	14.8				67.9			Unique	3.90895	High	9.533e-05	0.0004506
High	[K].QASEQNWANYSAEQNR.[M]	1xTMT6plex [N-Term]; 1xPhospho [S3(100)]	4504001 1xPhospho [S306(100)]	0.000526978	0.000323624	1	1	15	4504001	4504001 [304-319]	0	2204.96	S3(Phospho): 100	2072.2	936.9	1124.6	982.4	1493.8	872.9	5237.1	1239.7	914.8	654.7	10.79	11.89	28.35	59.07	8.54	69.35	68.9	14.43	61.8	54.25							Unique	5.13905	High	0.0001849	0.0004767
High	[R].QPSWDPSPVSSTVPAPSPLSAAAVSPSK.[L]	2xTMT6plex [N-Term; K28]; 2xPhospho [S3(100); S17(100)]	24431935 2xPhospho [S107(100); S121(100)]	0.000521156	0.000323624	1	3	1	24431935	24431935 [105-132]	0	3365.65	S3(Phospho): 100; S17(Phospho): 100	193.9	163.2	140.4	130.4	174.1	145.8	714	168.1	254.1	250.3												193.9					Unique	4.38393	High	9.533e-05	0.0004747
High	[K].SLTPAVPVESKPDKPSGK.[S]	4xTMT6plex [N-Term; K11; K14; K18]; 1xPhospho [S1(100)]	578810573 1xPhospho [S216(100)]; 578810575 1xPhospho [S216(100)]	0.000459866	0.000323624	2	44	5	578810573; 578810575	578810573 [216-233]; 578810575 [216-233]	0	2833.62	S1(Phospho): 100	64.6	1373.3	257.8	207.2	424.7	233.3	289.3	123.6	159.7	377												64.6					Not Unique	4.55634	High	9.533e-05	0.0004497
High	[K].GHYEVTGSDDETGK.[L]	2xTMT6plex [N-Term; K14]; 1xPhospho [T/S/Y]	1034575326 1xPhospho [S5774(99.6)]	0.000542259	0.000323624	1	5	6	1034575326	1034575326 [5767-5780]	0	2032.93	S8(Phospho): 100	1357.4	491.8	1365.7	345.3	442	525.6	1236.5	675.6	955.5	659.1	78.56	79.63	61.14	64.23		70.15	81.9		45.86	48.29							Unique	4.31621	High	0.0001849	0.0004816
High	[R].KGAGDGSDEEVDGK.[A]	3xTMT6plex [N-Term; K1; K14]; 1xPhospho [S7(100)]	1034629002 1xPhospho [S1943(100)]	0.000537167	0.000323624	1	1	36	1034629002	1034629002 [1937-1950]	1	2131.05	S7(Phospho): 100	14465.7	6575.4	6342.2	8346.8	13047.8	18560.3	11463	10617.9	8980.1	10399.6	11.34	6.19	9.89	5.96	7.64	9.74	9.32	14.64	12.99	9.97							Unique	4.73838	High	0.0001849	0.0004799
High	[R].APSTYGGGLSVSSSR.[F]	1xTMT6plex [N-Term]; 1xPhospho [T/S/Y]	15431310 1xPhospho [S51(100)]	0.000457736	0.000323624	1	1	89	15431310	15431310 [42-56]	0	1734.83	S3(Phospho): 99.68	673.7	1263.8	772	2112.5	808.8	1423.8	5151.4	791.9	717.4	602.3	77.19	100.59	93.21	106.89	80.22	91.72	98.13	80.59	64.62	89.72	987.1	1199.4	1431.2	411.6	317.7		Unique	5.54734	High	0.0002194	0.0005234
High	[R].IHIDPEIQDGSPTTSR.[R]	1xTMT6plex [N-Term]; 1xPhospho [S/T]		0.000536439	0.000323624	1	2	4	19923181	19923181 [102-117]	0	2075	S11(Phospho): 33.29; T13(Phospho): 33.29; S15(Phospho): 33.29	168.4	282.4	192.3	179.4	303.7	257.5	169.9	220.4	302.5	224.9																168.4	Unique	4.32994	High	0.0001849	0.0004797
High	[K].SQDADSPGSSGAPENLTFK.[E]	2xTMT6plex [N-Term; K19]; 1xPhospho [S6(100)]	1034650321 1xPhospho [S1787(100)]	0.000469131	0.000323624	1	17	17	1034650321	1034650321 [1782-1800]	0	2446.15	S6(Phospho): 100	1205	849.2	1725.9	1494.1	754.5	721.9	1375	831.4	1063.7	806.8	6.98	6.3	15.62	8.76	16.54	19.56	9.52	0.12	5.18	5.44							Unique	4.36261	High	9.533e-05	0.0004541
High	[R].TRDDGDEEGLLTHSEEELEHSQDTDADDGALQ.[-]	1xTMT6plex [N-Term]; 2xPhospho [T/S]	8051631 2xPhospho [T286(100); S288(100)]	0.000463423	0.000323624	1	2	15	8051631	8051631 [275-306]	1	3916.58	T12(Phospho): 100; S14(Phospho): 100		89.9	301.1	270.6	156.4			180.9	865.4	320.2			61.59	59.22	7.06			9.38	107.91	81.58							Unique	4.44326	High	9.533e-05	0.0004514
High	[R].ANSGGVDLDSSGEFASIEK.[M]	2xTMT6plex [N-Term; K19]; 1xPhospho [S3(100)]	578811835 1xPhospho [S1167(100)]	0.000451364	0.000323624	1	5	4	578811835	578811835 [1165-1183]	0	2421.16	S10(Phospho): 50; S11(Phospho): 50	202.4	293.4	440.7	159.6	255.1	224.9	482.5	233.4	325.3	317.9																202.4	Unique	3.97239	High	9.533e-05	0.0004454
High	[R].GSYGDLGGPIITTQVTIPK.[D]	2xTMT6plex [N-Term; K19]; 1xPhospho [S2(100)]	14165437 1xPhospho [S379(100)]	0.000488526	0.000323624	1	4	2	14165437	14165437 [378-396]	0	2455.32	S2(Phospho): 100	3090	2957.4	1569.2	1358.7	9072.2	2293.7	1840	907	1291.6	1929.9											3090						Unique	4.37197	High	9.533e-05	0.0004627
High	[K].EVPPPPAEESEEEDDDGLPK.[K]	2xTMT6plex [N-Term; K20]; 1xPhospho [S10(100)]	14149904 1xPhospho [S362(100)]	0.000465562	0.000323624	1	1	4	14149904	14149904 [353-372]	0	2717.25	S10(Phospho): 100	410	387.5	340.9	300.2	313.2	601	386.3	401	483.3	315.6																410	Unique	4.21882	High	9.533e-05	0.0004523
High	[K].SKGDSDISDEEAAQQSK.[K]	3xTMT6plex [N-Term; K2; K17]; 2xPhospho [S1(100); S8(100)]	530402194 2xPhospho [S1038(100); S1045(100)]	0.000542259	0.000323624	1	5	7	530402194	530402194 [1038-1054]	1	2642.22	S1(Phospho): 100; S8(Phospho): 100	959.1	6490	1723.3	3896.2	6355.4	2666.5	1529.2	3407.6	2334.5	2884.8	9.4	6.13	7.78	5.51	0.2	3.08	1.45	19.53	21.83	8.45							Unique	5.82901	High	0.0002194	0.0004956
High	[R].EREESEDELEEANGNNPIDIEVDQNK.[E]	2xTMT6plex [N-Term; K26]; 1xPhospho [S5(100)]	344925845 1xPhospho [S260(100)]	0.000492136	0.000323624	1	1	19	344925845	344925845 [256-281]	1	3553.62	S5(Phospho): 100	577.9	330.4	540.5	650.4	446.6	597.7	554.5	727.1	681.1	711	3.64	18.13	9.23	12.14	16.7	1.09	19.3	13.12	22.83	16.85				563	592.8		Unique	4.79842	High	9.533e-05	0.0004641
High	[R].SSPAPNLAPASPGPAQLQLVR.[E]	1xTMT6plex [N-Term]; 1xPhospho [S2(99.6)]	1034607132 1xPhospho [S219(99.6)]	0.000462	0.000323624	1	2	2	1034607132	1034607132 [218-238]	0	2380.26	S2(Phospho): 99.64	77.7	69.9	31.6	47	80.1	64.7	59.1	76.8	86	73.2														77.7			Unique	4.40042	High	9.533e-05	0.0004506
High	[K].EEGSLSDTEADAVSGQLPDPTTNPSAGK.[D]	2xTMT6plex [N-Term; K28]; 1xPhospho [S6(100)]	24308207 1xPhospho [S520(100)]	0.000474858	0.000323624	1	1	14	24308207	24308207 [515-542]	0	3311.56	S6(Phospho): 100	412.1	381.6	865.4	957.4	305.4	541.9	376	331	516.2	490.1	66.39	80.67	70.71	83.18	60.82	68.21	68.84	62.38	71.12	78.61						109.2	Unique	4.28659	High	0.0002786	0.0005538
High	[K].AAQQAASSSGQGQQAQTPTGK.[Q]	2xTMT6plex [N-Term; K21]; 1xPhospho [S/T]	68303575 1xPhospho [T351(100)]	0.000536439	0.000323624	1	3	6	68303575	68303575 [333-353]	0	2540.25	S7(Phospho): 33.33; S8(Phospho): 33.33; S9(Phospho): 33.33	258.9	285.1	285.7	301.7	101.7	499.3	227.1	318.4	188	335.4	23.75	20.31	48.59	71.26	49.09	13.48	19.92	11.2	9.61	27.44							Unique	3.19642	High	0.0001849	0.0004797
High	[K].SPESDLEDFSDETNTENLYGTSPPSTPR.[Q]	1xTMT6plex [N-Term]; 1xPhospho [S22(99.5)]	55956904 1xPhospho [S84(99.5)]	0.000510978	0.000323624	1	4	5	55956904	55956904 [63-90]	0	3394.47	S22(Phospho): 99.52	75.2	60.1	79.6	60.1	60.4	67.6	74.4	78.3	80.4	60.7																75.2	Unique	3.99564	High	0.0002194	0.0004857
High	[R].QEAIPDLEDSPPVSDSEEQQESAR.[A]	1xTMT6plex [N-Term]; 1xPhospho [S10(100)]	768015660 1xPhospho [S841(100)]	0.000454192	0.000323624	1	3	7	768015660	768015660 [832-855]	0	2965.31	S10(Phospho): 100	242	107	159.2	202	149.4	172.5	539.9	195.2	194.8	155.9	77.89	39.94	48.86	30.69	69.17	54.14	109.44	51.85	60.64	32.28				108.7	375.3		Unique	3.63174	High	9.533e-05	0.0004469
High	[K].TTTAAAVASTGPSSRSPSTLLPK.[K]	2xTMT6plex [N-Term; K23]; 1xPhospho [S/T]		0.000471277	0.000323624	1	47	20	578806081	578806081 [1984-2006]	1	2739.47	S16(Phospho): 99.99	81.2	263	114.7	175	129.3	89.9	594	125.8	155.8	134.5	58.3	27.98	59.04	62.8	68.33	70.84	34.57	70.95	64.63	59.28							Unique	3.77498	High	0.0001849	0.0004788
High	[R].VTEPISAESGEQVER.[V]	1xTMT6plex [N-Term]; 1xPhospho [S6(100)]	21735616 1xPhospho [S330(100)]	0.000488526	0.000323624	1	4	3	21735616	21735616 [322-336]	0	1939.92	S9(Phospho): 100	773.7	569.6	743.5	560	501.9	766.3	462.5	686.9	614.5	813.7																773.7	Unique	4.66149	High	9.533e-05	0.0004625
High	[K].SPVGSGAPQAAAPAPAAHVAGNPGGDAAPAATGTAAAASLATAAGSEDAEK.[K]	2xTMT6plex [N-Term; K51]; 1xPhospho [S1(100)]	224586882 1xPhospho [S34(100)]	0.000620912	0.000406115	1	5	2	224586882	224586882 [34-84]	0	4917.41	S1(Phospho): 100																											No Quan Values	4.22293	High	0.0002194	0.0005037
High	[R].ADGGTGDSSPSPGSSLPSPLSDPR.[R]	1xTMT6plex [N-Term]; 2xPhospho [S18(97.7); S/T]	51479166 2xPhospho [S606(98.4); S615(98.4)]	0.000679152	0.000406115	1	3	11	51479166	51479166 [598-621]	0	2630.12	S9(Phospho): 49.82; S11(Phospho): 49.82; S18(Phospho): 99.27	334.4	271	312.8	314.4	477.9	496.1	697.5	447.7	307.7	565																334.4	Unique	3.64213	High	0.0002194	0.0005235
High	[R].EAPATGPSPQHPQK.[M]	2xTMT6plex [N-Term; K14]; 1xPhospho [S8(99.8)]	118918415 1xPhospho [S312(99.8)]	0.000799541	0.000406115	1	1	3	118918415	118918415 [305-318]	0	1983.01	S8(Phospho): 99.75	202.2	306.8	215.8	189.6	239.6	275.6	173.3	163	202.7	291.9	45.97	77	62.71	17.59	33.25	29.43	21.26	25.69	38.67	18.4				267.9	136.5		Unique	3.17547	High	0.0002786	0.0006256
High	[R].RKGSGSEQEGEDEEGGER.[K]	2xTMT6plex [N-Term; K2]; 2xPhospho [S4(100); S6(100)]	7661950 2xPhospho [S941(100); S943(100)]	0.000919871	0.000406115	1	1	4	7661950	7661950 [938-955]	2	2554.09	S4(Phospho): 100; S6(Phospho): 100	258.2	114.6	534.7	394.6	356.1	342.5	358	457.1	379.2	416.6																258.2	Unique	4.27297	High	0.0004065	0.0007071
High	[R].HGSFHEDEDPIGSPR.[L]	1xTMT6plex [N-Term]; 1xPhospho [S3(100)]	14790190 1xPhospho [S1268(100)]	0.000930455	0.000406115	1	1	4	14790190	14790190 [1266-1280]	0	1988.87	S3(Phospho): 100	218.7	244.6	330.8	259.4	382.7	177.9	174	332.7	230.9	238.7	73.64	77.47	77.08	73.74	72.48	48.22	77.06	88.32	64.15	53.25				104.8	332.6		Unique	3.7049	High	0.0004065	0.0007076
High	[R].TEGTPPPPGQPAK.[G]	2xTMT6plex [N-Term; K13]; 1xPhospho [T4(100)]	359718912 1xPhospho [T2368(100)]	0.000731555	0.000406115	1	1	5	359718912	359718912 [2365-2377]	0	1814.95	T4(Phospho): 100	708.6	435	413	426.3	510.9	609.7	443.8	490.1	507.4	539.7	1.56	19.16	16.07	21.96	2.65	15.54	15.42	6.13	15.53	16.18				700.8	716.4		Unique	3.84844	High	0.0002786	0.000554
High	[R].SLNDDGSSDPRDIDQDNR.[S]	1xTMT6plex [N-Term]; 1xPhospho [S]	55750053 1xPhospho [S119(99.7)]	0.000867909	0.000406115	1	1	8	55750053	55750053 [112-129]	1	2327.99	S8(Phospho): 99.69	105	296.4	152.3	258.1	161.4	172.1	139.5	275.8	300.3	1073.6	78.24	32.27	0.67	13.23	18.79	1.5	3.63	5.37	29.78	12.04				163.1	46.9		Unique	2.98878	High	0.0004065	0.0006944
High	[R].GSDNEGSGQGSGNESEPEGSNNEASDR.[G]	1xTMT6plex [N-Term]; 2xPhospho [S7(100); S20(100)]	7661950 2xPhospho [S1143(100); S1156(100)]	0.000785953	0.000406115	1	1	1	7661950	7661950 [1137-1163]	0	3056.12	S7(Phospho): 100; S20(Phospho): 100			178.4	279.2			103	484.8																			Unique	3.3303	High	0.0002786	0.0006095
High	[K].KEPAITSQNSPEAR.[E]	2xTMT6plex [N-Term; K1]; 1xPhospho [S10(100)]		0.00087786	0.000406115	1	4	3	5803191	5803191 [91-104]	1	2066.07	S10(Phospho): 100		657.6	585	1609	909.7	3571.8	752.4	1447	3808.5	1321.2			43.85	38.82	17.65	44.68		70.13	52.82	31.07							Unique	3.28755	High	0.0004065	0.0006992
High	[R].EAARSPDKPGGSPSASR.[R]	2xTMT6plex [N-Term; K8]; 1xPhospho [S5(100)]	157694511 1xPhospho [S49(100)]	0.000981959	0.000406115	1	1	3	157694511	157694511 [45-61]	1	2208.12	S5(Phospho): 100	317.8	488.1	295.2	427.2	339.2	345.3	301.7	583.4	479.4	379.2																317.8	Unique	3.43387	High	0.0004065	0.00074
High	[R].HRPSPPATPPPK.[T]	2xTMT6plex [N-Term; K12]; 2xPhospho [S4(100); T8(100)]	1034554585 2xPhospho [S427(100); T431(100)]	0.000831646	0.000406115	1	32	66	1034554585	1034554585 [424-435]	0	1899.96	S4(Phospho): 100; T8(Phospho): 100	1532.8	7193.5	2903.6	6628.4	10266	2813.6	1893	4568.9	2717.9	2693.4	3.83	58.52	22.74	60.08	59.18	22.24	19.45	51	32.32	30						1574.4	Unique	5.26619	High	0.0004065	0.0007079
High	[K].RASEDSEEEPSGK.[K]	2xTMT6plex [N-Term; K13]; 1xPhospho [S3(100)]	767945806 1xPhospho [S122(100)]	0.00104585	0.000406115	1	5	1	767945806	767945806 [120-132]	1	1958.91	S3(Phospho): 100	102.6	258.8	198.3	138.1	248.1	233.6	170.6	111.7	171.2	167.8																102.6	Unique	4.2014	High	0.0004065	0.0007262
High	[R].AGDLLEDSPKRPK.[E]	3xTMT6plex [N-Term; K10; K13]; 1xPhospho [S8(100)]	186928819 1xPhospho [S181(100)]	0.00102301	0.000406115	1	5	23	186928819	186928819 [174-186]	1	2193.22	S8(Phospho): 100	597.8	1416.8	794.6	1036.1	1196.7	1073.6	698.4	1226.1	1155.7	738.8	81.46	85.94	84.54	84.26	94.83	89.39	79.29	91.9	93.12	79.6							Unique	3.77873	High	0.0004065	0.0007688
High	[R].RRSQSIEQESQEK.[Q]	2xTMT6plex [N-Term; K13]; 2xPhospho [S3(100); S5(100)]	166235169 2xPhospho [S527(100); S529(100)]	0.00103567	0.000406115	1	4	5	166235169	166235169 [525-537]	2	2223.06	S3(Phospho): 100; S5(Phospho): 100	592.1	1146.4	1103.5	1691.7	1439	630.4	759.1	1552.5	1147.3	681																592.1	Unique	4.32803	High	0.0004065	0.0007533
High	[R].TLHSPPLQLQQR.[S]	1xTMT6plex [N-Term]; 1xPhospho [S4(100)]	767985874 1xPhospho [S1198(100)]	0.00113551	0.000406115	1	14	4	767985874	767985874 [1195-1206]	0	1726.92	S4(Phospho): 100	215.2	203.1	233.3	140.4	193.6	180.1	136.2	138	134.5	187		56.73	19.56	40.08	39.57	66.73	27.84	44.44	63.08	71.19							Unique	2.89511	High	0.0004659	0.0008086
High	[R].HRPSPPATPPPK.[T]	2xTMT6plex [N-Term; K12]; 1xPhospho [S4(100)]	1034554585 1xPhospho [S427(100)]	0.000572698	0.000406115	1	32	13	1034554585	1034554585 [424-435]	0	1820	S4(Phospho): 100	826.1	2630.2	1607	1993.5	3171.5	1373.7	1392.6	3476.9	1768.8	1042.8	30.08	38.76	34.1	27.52	26.99	20.39	33.72	34.82	26.49	33.15				1001.8	650.3		Unique	4.67193	High	0.0002194	0.0004903
High	[K].TPDLSNQNSSDQANEEWETASESSDFNERR.[E]	1xTMT6plex [N-Term]; 1xPhospho [S/T]		0.000912698	0.000406115	1	18	6	530364414	530364414 [1482-1511]	1	3752.58	S23(Phospho): 49.84; S24(Phospho): 49.84	102.6	118.7	127.6	112.8	106.6	127.8	129.5	116.2	132.8	141.4																102.6	Unique	3.30491	High	0.0004065	0.0007065
High	[R].QASFSGSPEISQGEVGMDQSVK.[Q]	2xTMT6plex [N-Term; K22]; 1xPhospho [S3(100)]	110347463 1xPhospho [S1085(100)]	0.00113692	0.000406115	1	1	1	110347463	110347463 [1083-1104]	0	2806.34	S3(Phospho): 100																											No Quan Values	3.19761	High	0.0004065	0.0007652
High	[R].QSGDGQESTEPVENK.[V]	2xTMT6plex [N-Term; K15]; 1xPhospho [S2(100)]	530411800 1xPhospho [S148(100)]	0.000747109	0.000406115	1	1	6	530411800	530411800 [147-161]	0	2143	S2(Phospho): 100	595	431.8	532.8	620.4	205.5	536.2	576.9	418.9	461	566.6	17.77	18.81	22.58	9.19	11.71	3.28	0.19	16.29	15.49	9.93				669.8	520.3		Unique	4.49323	High	0.0002786	0.0005674
High	[R].YDEGSGGSGDEGRDEAHK.[R]	2xTMT6plex [N-Term; K18]; 1xPhospho [S8(100)]	530413160 1xPhospho [S491(100)]	0.000904614	0.000406115	1	7	3	530413160	530413160 [484-501]	1	2404.05	S8(Phospho): 99.99																											No Quan Values	3.08306	High	0.0004065	0.0007057
High	[R].SQLPTLEQDGGTQNPVSSPGMSQELR.[T]	1xTMT6plex [N-Term]; 1xOxidation [M21(100)]; 1xPhospho [S18(99.2)]	530397737 1xPhospho [S373(99.2)]	0.000696188	0.000406115	1	16	2	530397737	530397737 [356-381]	0	3081.44	S18(Phospho): 99.2; M21(Oxidation): 100	62.9	43.4	63.4	45.4	57.6	83.5	58.1	87.7	81.2	131.3																62.9	Unique	3.39515	High	0.0002784	0.0005314
High	[K].SGTPPRQGSITSPQANEQSVTPQRR.[S]	1xTMT6plex [N-Term]; 3xPhospho [S19(100); T21(100); T/S]	118572613 3xPhospho [S854(100); T866(100); T/S]	0.000744568	0.000406115	1	2	8	118572613	118572613 [846-870]	2	3148.42	T3(Phospho): 99.99; S9(Phospho): 100; T21(Phospho): 100	182.9	485.1	102.5	556.7	253.9	306.5	294	274.2	366.5	368.4	50.74	9.72	44.47	12.95	18.64	25.28	26.99	36.43	15.26	47.59				248.5	117.3		Unique	5.08201	High	0.0002786	0.0005647
High	[K].SSPSKENESSDSEEEVSRPR.[K]	2xTMT6plex [N-Term; K5]; 1xPhospho [S2(99.5)]	47578105 1xPhospho [S2483(99.5)]; 530378760 1xPhospho [S2483(99.5)]	0.000884016	0.000406115	2	9	2	47578105; 530378760	47578105 [2482-2501]; 530378760 [2482-2501]	1	2774.29	S2(Phospho): 99.47	140	133	67.3	237.6	91.6	154.8	55.6	140.2	96.2	80.1																140	Not Unique	3.5126	High	0.0004065	0.0007013
High	[R].ASDPDEAGGPEGSEAVQSGTPEEPEPELEAEASK.[E]	2xTMT6plex [N-Term; K34]; 1xPhospho [S/T]		0.000832992	0.000406115	1	2	3	444299624	444299624 [192-225]	0	3934.76	S13(Phospho): 33.33; S18(Phospho): 33.33; T20(Phospho): 33.33									144.5																		Unique	3.17627	High	0.0003683	0.0006652
High	[R].RQNSVSDFPPPAGR.[E]	1xTMT6plex [N-Term]; 1xPhospho [S4(100)]	767917250 1xPhospho [S927(100)]	0.000958316	0.000406115	1	4	6	767917250	767917250 [924-937]	1	1836.9	S4(Phospho): 100	403.7	481.5	351	340.7	429.8	432.3	283.6	334	453.5	466.8	2	9.95	12.93	1.8	9.64	6.73	8.42	10.64	18.46	5.03				398	409.4		Unique	3.52427	High	0.0004065	0.000709
High	[R].NKSEDEDEDEGDATR.[S]	2xTMT6plex [N-Term; K2]; 1xPhospho [S3(100)]	39930475 1xPhospho [S186(100)]	0.000993478	0.000406115	1	1	1	39930475	39930475 [184-198]	1	2247.97	S3(Phospho): 100	73.3	237.9	104	604	173.9	690.9	1662.8	124.4	257.6	89.7																73.3	Unique	4.80373	High	0.0004065	0.0007129
High	[R].RGFSDSGGGPPAK.[Q]	2xTMT6plex [N-Term; K13]; 1xPhospho [S4(100)]	33356174 1xPhospho [S66(100)]	0.000605527	0.000406115	1	1	5	33356174	33356174 [63-75]	1	1770.89	S4(Phospho): 100	634.9	705.7	1224.6	872.6	513.6	596.6	1188.4	675.6	1017.3	1327.3	29.81	25.89	29.12	31.68	19.18	18.99	21.58	24.46	33.17	30.75				768.8	501.1		Unique	4.87765	High	0.0002194	0.0004994
High	[R].SRDSGDENEPIQER.[F]	1xTMT6plex [N-Term]; 1xPhospho [S4(99.2)]		0.000787782	0.000406115	1	14	19	767931464	767931464 [1203-1216]	1	1940.85	S4(Phospho): 100	385.5	1052.5	828.8	402.7	959.6	2262.6	1734.1	608.9	687.9	1163.9	51.28	70.2	65.63	57.61	67.7	74.52	10.57	57.15	117.23	77.07							Unique	4.52793	High	0.0004065	0.0006899
High	[K].KAEAAAAPTVAPGPAQPGHVSPTPATTSPGEK.[G]	3xTMT6plex [N-Term; K1; K32]; 1xPhospho [S/T]		0.000545168	0.000406115	1	2	20	10863899	10863899 [243-274]	1	3760.99	S21(Phospho): 99.65	383.1	201.1	270.2	167.1	211.2	208.2	154	357.5	289.9	50.5																	Unique	3.87615	High	0.0002194	0.0004825
High	[R].EHDGSSPGNTGK.[E]	2xTMT6plex [N-Term; K12]; 1xPhospho [S5(99.7)]	767926181 1xPhospho [S269(99.7)]	0.00121959	0.000406115	1	3	7	767926181	767926181 [265-276]	0	1723.81	S5(Phospho): 99.73	83	68.3	79.9	76.2	130	121.7	36.9	112	138.9	74.8			62.45	58.66	21.39	70.6				45.55							Unique	2.56225	High	0.0004065	0.0007991
High	[K].EGHSLEMENENLVENGADSDEDDNSFLK.[Q]	2xTMT6plex [N-Term; K28]; 1xPhospho [S19(99.5)]	767974553 1xPhospho [S687(99.5)]	0.000984381	0.000406115	1	5	2	767974553	767974553 [669-696]	0	3675.6	S19(Phospho): 99.48	25.5	23.1	31.8	40.1	34.9	25.8	51.6	37.9	42.5	33.2																25.5	Unique	3.12796	High	0.0004065	0.0007116
High	[R].RHTDPVQLQAAGR.[V]	1xTMT6plex [N-Term]; 1xPhospho [T3(100)]	625180309 1xPhospho [T262(100)]	0.000890328	0.000406115	1	3	6	625180309	625180309 [260-272]	1	1757.9	T3(Phospho): 100	459.5	348.7	376.1	468.8	295	651.1	198.8	427.9	582.7	391.4	12.14	11.2	4.21	0.71	13.99	2.05	5.05	15.86	3.62	10.92				498.9	420.1		Unique	3.72501	High	0.0004065	0.0007132
High	[R].QPSSSSSEDSDEEWRR.[C]	1xTMT6plex [N-Term]; 1xPhospho [S]	555289996 1xPhospho [S155(100)]	0.000733145	0.000406115	1	4	4	555289996	555289996 [146-161]	1	2190.91	S10(Phospho): 100	82.3	295.1	100.9	149.5	174.5	174.6	111.4	299	237.7	124.3	74.71	10.24	17.47	0.34	30.44	7.1	0.25	6.65	10.75	3.92				38.8	125.8		Unique	3.32011	High	0.0002786	0.0005553
High	[K].MNEEISSDSESESLAPR.[K]	1xTMT6plex [N-Term]; 1xPhospho [S9(99.7)]	4759276 1xPhospho [S53(99.7)]	0.000821822	0.000406115	1	1	2	4759276	4759276 [45-61]	0	2189.95	S9(Phospho): 99.69	114	135.4	138.1	100.2	100.3	150.2	131.5	116.6	100.4	152.3																114	Unique	3.6877	High	0.0003285	0.0006529
High	[K].SPLNDMSDDDDDDDSSD.[-]	1xTMT6plex [N-Term]; 1xPhospho [S16(99.6)]	13375827 1xPhospho [S248(99.5)]	0.00105322	0.000406115	1	1	2	13375827	13375827 [233-249]	0	2166.74	S16(Phospho): 99.6	196.7	116.3	213.6	203.6	123	135.9	171.1	142	197.9	151.2																196.7	Unique	2.88329	High	0.0004065	0.000729
High	[R].GEAERGSGGSSGDELREDDEPVK.[K]	2xTMT6plex [N-Term; K23]; 1xPhospho [S7(100)]	768004469 1xPhospho [S390(100)]	0.000860663	0.000406115	1	5	3	768004469	768004469 [384-406]	2	2914.35	S7(Phospho): 100	116.5	434.7	163.5	231.8	261.7	90.8	98.5	162.8	395.8	106.4		50.22	29.69	63.79	58.19	5.5	57.15	45.08	38.88	16.86				116.5			Unique	3.50909	High	0.0004065	0.0006898
High	[R].STSTPNVHMVSTTLPVDSR.[M]	1xTMT6plex [N-Term]; 1xOxidation [M9(100)]; 1xPhospho [T/S]	4506401 1xPhospho [S259(98.9)]	0.000827617	0.000406115	1	4	22	4506401	4506401 [257-275]	0	2354.13	S3(Phospho): 98.81; M9(Oxidation): 100	199	321.3	237.4	238.1	308.5	302.1	247.4	245	255.6	273	52.37	45.64	7.93	31.72	30.5	18.67	1.79	4.84	9.66	19.78							Unique	3.71653	High	0.0003683	0.0006592
High	[R].VAAAAGSGPSPPGSPGHDR.[E]	1xTMT6plex [N-Term]; 1xPhospho [S10(99.3)]	13559514 1xPhospho [S51(99.2)]	0.000841127	0.000406115	1	1	2	13559514	13559514 [38-56]	0	1996.94	S10(Phospho): 99.32																											No Quan Values	2.54248	High	0.0003683	0.0006735
High	[K].THTTALAGRSPSPASGR.[R]	1xTMT6plex [N-Term]; 2xPhospho [S12(100); T/S]	118572613 2xPhospho [S295(100); S297(99.3)]	0.000780889	0.000406115	1	2	6	118572613	118572613 [286-302]	1	2055.96	S10(Phospho): 98.66; S12(Phospho): 99.99	471.5	744.1	818.2	993	786.4	742.8	698.5	679.6	1007.8	808.4																471.5	Unique	3.47759	High	0.0002786	0.0006033
High	[K].RADSGEEENTK.[N]	2xTMT6plex [N-Term; K11]; 1xPhospho [T10(99.1)]	32306539 1xPhospho [S181(100)]	0.00092048	0.000406115	1	1	1	32306539	32306539 [178-188]	1	1773.84	S4(Phospho): 100	241.2	161.6	215.1	245.4	269.3	231.1	212.5	207.6	175.4	166.4																241.2	Unique	4.78427	High	0.0004065	0.0007071
High	[R].QNQQSSSDSGSSSSSEDERPK.[R]	2xTMT6plex [N-Term; K21]; 2xPhospho [S9(97.2); S]	1034554585 2xPhospho [S521(97.2); S]	0.000924788	0.000406115	1	32	1	1034554585	1034554585 [513-533]	0	2845.19	S9(Phospho): 97.21; S11(Phospho): 20.28; S12(Phospho): 20.28; S13(Phospho): 20.28; S14(Phospho): 20.28; S15(Phospho): 20.28	25.5	142.8	26.4	101.9	100.6	63.9	35.1	99.9	44.4	21.4																25.5	Unique	2.69592	High	0.0004065	0.0007073
High	[K].QEAGDSPPPAPGTPK.[A]	2xTMT6plex [N-Term; K15]; 2xPhospho [S6(100); T13(100)]	298676520 2xPhospho [S690(100); T697(100)]	0.00115139	0.000406115	1	3	2	298676520	298676520 [685-699]	0	2066.96	S6(Phospho): 100; T13(Phospho): 100	184	312.9	200.3	229.7	509.4	218.4	235.3	226.1	305.8	257.2																184	Unique	3.72312	High	0.0004065	0.0007719
High	[K].AAVLSDSEDEEK.[A]	2xTMT6plex [N-Term; K12]; 2xPhospho [S5(100); S7(100)]	530369278 2xPhospho [S403(100); S405(100)]	0.000951188	0.000406115	1	7	12	530369278	530369278 [399-410]	0	1910.84	S5(Phospho): 100; S7(Phospho): 100	1704.9	352.5	807.7	693.8	410.5	880.5	683.7	766.7	505.3	900.3																1704.9	Unique	3.69785	High	0.0004065	0.0007127
High	[K].DELAELSEAESEGDEKPK.[L]	3xTMT6plex [N-Term; K16; K18]; 2xPhospho [S7(100); S11(100)]	578829235 2xPhospho [S1468(100); S1472(100)]	0.000682256	0.000406115	1	10	4	578829235	578829235 [1462-1479]	0	2823.32	S7(Phospho): 100; S11(Phospho): 100	256.3	126.6	168.2	147.8	165.7	157.9	114.7	230.1	159	203.2																256.3	Unique	3.76085	High	0.0002194	0.0005248
High	[K].SQNSQESTADESEDDMSSQASK.[S]	2xTMT6plex [N-Term; K22]; 1xOxidation [M16(100)]; 1xPhospho [S4(100)]	21361861 1xPhospho [S1404(100)]	0.00083931	0.000406115	1	2	2	21361861	21361861 [1401-1422]	0	2915.21	S4(Phospho): 100; M16(Oxidation): 100	48.5	74.7	36.9	139.7	24.5	80	110.7		29.3	47.4		17.75	19.86	11.56	27.16	12.81	8.57		2.71	45.12				48.5			Unique	3.92795	High	0.0003683	0.0006718
High	[R].SDQDSDSDQPSRK.[R]	2xTMT6plex [N-Term; K13]; 1xPhospho [S5(99.5)]	7661950 1xPhospho [S1087(99.4)]	0.00109334	0.000406115	1	1	2	7661950	7661950 [1081-1093]	1	2002.91	S7(Phospho): 99.4	76.1	253.8	184.1	261.1	184.4	248.5	149.6	267.4	217.1	183.8																76.1	Unique	3.73554	High	0.0004065	0.0007453
High	[R].EGETQGVAFEHESPADFQNSQSPVQDQDK.[S]	2xTMT6plex [N-Term; K29]; 1xPhospho [S/T]		0.000640088	0.000406115	1	3	2	5032033	5032033 [341-369]	0	3742.69	S20(Phospho): 49.76; S22(Phospho): 49.76																											No Quan Values	4.41897	High	0.0002194	0.0005095
High	[K].NESSPAPPDSDADK.[L]	2xTMT6plex [N-Term; K14]; 1xPhospho [S4(99.5)]	47777319 1xPhospho [S668(99.5)]	0.000984381	0.000406115	1	1	8	47777319	47777319 [665-678]	0	1967.9	S4(Phospho): 99.54	294.9	294.6	345.2	232.5	351.7	238.1	220.8	245.1	293.1	201.5	49.41	6.43	15.12	10.22	7.85	8.32	25.35	21.52	31.24	0.42				398	191.9		Unique	3.73697	High	0.0004065	0.0007115
High	[R].QLSSSSGNTDTQADEDER.[A]	1xTMT6plex [N-Term]; 1xPhospho [S3(99.7)]	530401713 1xPhospho [S1302(99.7)]	0.000600582	0.000406115	1	9	12	530401713	530401713 [1300-1317]	0	2248.94	S5(Phospho): 49.78; S6(Phospho): 49.78	132	404.1	237.1	214.9	236.7	142.9	150.6	195.9	200.7	428.7	69.21	47.63	65.54	103.38	47.05	93.68	79.64	44.65	42.83	60.28				124.3	44.8	227	Unique	4.37034	High	0.0002194	0.0005267
High	[R].RSPSVSSPEPAEK.[S]	2xTMT6plex [N-Term; K13]; 2xPhospho [S2(100); S]	118572613 2xPhospho [S1727(100); S]	0.00105536	0.000406115	1	2	9	118572613	118572613 [1726-1738]	1	1988.95	S2(Phospho): 100; S4(Phospho): 49.86; S7(Phospho): 49.86	752.4	1671.2	929.9	1213	2146	1242	1263.7	1251.4	1262.5	1449.8																752.4	Unique	4.40447	High	0.0004792	0.0008242
High	[R].STSVTTTSSASVTTTSNASGR.[R]	1xTMT6plex [N-Term]; 1xPhospho [T/S]	131412225 1xPhospho [T435(98.8)]	0.000899567	0.000406115	1	1	14	131412225	131412225 [430-450]	0	2312.08	T2(Phospho): 49.87; S3(Phospho): 49.87	101.8	75.2	45.6	85.1	67.2	124.3	32.6	90.1	110.4	104.2	36.26	5.65	23.86	1.65	4.67	27.23	41.97	17.96	5.53	3.27				75.7	127.9		Unique	3.53117	High	0.0004065	0.0007086
High	[R].RMSQENPSQATETELAQR.[L]	1xTMT6plex [N-Term]; 1xPhospho [S3(100)]	767912068 1xPhospho [S2681(100)]	0.000916255	0.000406115	1	7	1	767912068	767912068 [2679-2696]	1	2385.11	S3(Phospho): 100																											No Quan Values	3.96	High	0.0004065	0.0007068
High	[K].LASDDRPSPPR.[G]	1xTMT6plex [N-Term]; 1xPhospho [S8(100)]	325120986 1xPhospho [S788(100)]	0.00112171	0.000406115	1	11	11	325120986	325120986 [781-791]	0	1519.75	S8(Phospho): 100	2035.1	3302.7	5000.9	4111	4186	423.9	1721.8	5077.7	4428.3	2973.9	109.37	108.86	108.74	105.63	106.69	42.52	106.31	105.16	108.04	112.35				399.9	296.4		Unique	3.27192	High	0.0004065	0.0007582
High	[R].SSSVSSSAASSPER.[K]	1xTMT6plex [N-Term]; 1xPhospho [S]		0.0011888	0.000406115	1	4	4	34996489	34996489 [1447-1460]	0	1647.74	S10(Phospho): 50; S11(Phospho): 50	83	32.4		50.4	61.5	79.7	34.4	277.8	53.8	58.6				25.44				77.18									Unique	3.00052	High	0.0004065	0.0007876
High	[K].SLGGESSGGTTPVGSFHTEAAR.[W]	1xTMT6plex [N-Term]; 1xPhospho [S/T]		0.000632615	0.000406115	1	19	12	578801799	578801799 [1509-1530]	0	2414.12	S6(Phospho): 50; S7(Phospho): 50	220.9	169.6	173.5	133.9	139.2	133.7	102.1	210	203.9	219	66.49	64.13	61.75	25.62	37.75	46.12	33.07	49.81	62.49	26.76							Unique	3.14796	High	0.0002194	0.0005134
High	[R].ADGGTGDSSPSPGSSLPSPLSDPR.[R]	1xTMT6plex [N-Term]; 1xPhospho [S9(99)]		0.000648809	0.000406115	1	3	27	51479166	51479166 [598-621]	0	2550.16	S18(Phospho): 98.38	206.7	331.5	297.9	310.1	225.8	325	273	230.2	280.4	470.6	35.93	51.38	54.15	95.51	66.91	41.91	73.43	57.63	65.84	61.9		127.1	218.9				Unique	3.34388	High	0.0002786	0.0005747
High	[R].GSSGENNNPGSPTVSNFR.[Q]	1xTMT6plex [N-Term]; 1xPhospho [S11(100)]	1034673727 1xPhospho [S42(100)]	0.0009605	0.000406115	1	1	3	1034673727	1034673727 [32-49]	0	2129.95	S11(Phospho): 100		232	359.8	314.3	550.2	303.1	171.8	319.6	287	209.7		36.66	25.65	5.23			16.31	7.57	13.47								Unique	2.74393	High	0.0004065	0.0007091
High	[R].RESDESGESAPDEGGEGAR.[A]	1xTMT6plex [N-Term]; 1xPhospho [S3(100)]	116089282 1xPhospho [S735(100)]	0.0010397	0.000406115	1	1	1	116089282	116089282 [733-751]	1	2243.93	S3(Phospho): 100		127.8	295	404.8	166.8	208.1	460.7		280.7	349.1																	Unique	3.34368	High	0.0004065	0.0007242
High	[R].RESDESGESAPDEGGEGAR.[A]	1xTMT6plex [N-Term]; 2xPhospho [S3(100); S6(100)]	116089282 2xPhospho [S735(100); S738(100)]	0.000784577	0.000406115	1	1	1	116089282	116089282 [733-751]	1	2323.89	S3(Phospho): 100; S6(Phospho): 100	161.9		260.7	390.8	139		173.5																				Unique	4.01867	High	0.0002786	0.0006078
High	[R].DPGVSESPPPGR.[Q]	1xTMT6plex [N-Term]; 1xPhospho [S7(99.3)]	530405767 1xPhospho [S969(99.4)]	0.00100469	0.000406115	1	10	21	530405767	530405767 [963-974]	0	1503.7	S7(Phospho): 100	2731.9	981.7	812.1	1514.1	1336.4	1485.1	722.3	1201.5	1465.9	730.8	5.21	2.64	15.87	7.43	2.51	2.53	16.85	4.65	9.53	9.92				2832.5	2631.2		Unique	3.47715	High	0.0004065	0.0007149
High	[R].YHGHSMSDPGVSYR.[T]	1xTMT6plex [N-Term]; 1xOxidation [M6(100)]; 1xPhospho [S5(100)]	291084742 1xPhospho [S331(100)]	0.000864506	0.000406115	1	6	11	291084742	291084742 [327-340]	0	1917.82	S5(Phospho): 100; M6(Oxidation): 100	156.5	440.2	146.6	199.5	641.9	179.4	232.4	251.9	141.7	206	36.31	52.41	19.34	31.68	61.22	30.6	47.76	46.7	13.6	34.36						94.6	Unique	3.68917	High	0.0004065	0.0006923
High	[R].DTYSDRSGSSSPDSEITELK.[F]	2xTMT6plex [N-Term; K20]; 2xPhospho [S7(100); S/T/Y]	148491070 2xPhospho [S568(100); S571(99.3)]	0.000630563	0.000406115	1	2	2	148491070	148491070 [565-584]	1	2792.23	S7(Phospho): 99.99; S10(Phospho): 49.86; S11(Phospho): 49.86	447.9	823	1017.4	428.4	806.1	324.2	465.5	240.1	379.8	467.1																447.9	Unique	4.49168	High	0.0002194	0.0005065
High	[K].TEESPASDEAGEK.[E]	2xTMT6plex [N-Term; K13]; 1xPhospho [S7(100)]	48255933 1xPhospho [S89(100)]	0.000792329	0.000406115	1	1	21	48255933	48255933 [83-95]	0	1887.86	S7(Phospho): 100	2300.3	917.7	2064	1758.7	898.9	2677.6	1170.5	2809.8	2348.3	1723.6	23.62	26.02	17.31	20.2	22.82	23.02	16.95	23.28	13.23	20.23				1916.2	2684.5		Unique	4.32875	High	0.0002786	0.0006171
High	[R].DGPGLERSPGEPGGAAPER.[E]	1xTMT6plex [N-Term]; 1xPhospho [S8(100)]	7657575 1xPhospho [S47(100)]	0.0011124	0.000406115	1	1	2	7657575	7657575 [40-58]	1	2158.01	S8(Phospho): 100	118.6	69.7	92.4	72.6	159.4	116.2	63.9	123.7	174	158.1	6.7	11.38	14.81	2.84	5.69	0.29	27.47	4.6	10.56	27.23				124.3	113		Unique	3.16157	High	0.0004065	0.0007543
High	[R].METVSNASSSSNPSSPGR.[I]	1xTMT6plex [N-Term]; 1xOxidation [M1(100)]; 2xPhospho [S/T]	1034584020 2xPhospho [S1166(98.7); S/T]	0.00108247	0.000406115	1	7	10	1034584020	1034584020 [1152-1169]	0	2199.88	M1(Oxidation): 100; S8(Phospho): 50; S9(Phospho): 50; S10(Phospho): 50; S11(Phospho): 50	76.8	155.7	68	120.8	193.9	87.3	95.8	148.6	158.5	114.1		13.15			14.15			27.83							76.8		Unique	2.50889	High	0.0004065	0.0007406
High	[R].SVDQGGGGSPR.[K]	1xTMT6plex [N-Term]; 1xPhospho [S9(100)]	1034557138 1xPhospho [S1963(100)]	0.00112853	0.000406115	1	6	3	1034557138	1034557138 [1955-1965]	0	1325.6	S9(Phospho): 100	402.5	564.1	476.2	919.9	510.9	565.3	710.5	629.8	606	689.2																402.5	Unique	3.89111	High	0.0004065	0.0007615
High	[R].RRSSDEDAAGEPK.[A]	2xTMT6plex [N-Term; K13]; 2xPhospho [S3(100); S4(100)]	742800211 2xPhospho [S217(100); S218(100)]	0.00104173	0.000406115	1	4	9	742800211	742800211 [215-227]	2	2035.93	S3(Phospho): 100; S4(Phospho): 100	1533.2	1775.8	1561.5	1187	1870.2	1537.3	847.3	1870	1243.3	1617.3																1533.2	Unique	4.43166	High	0.0004792	0.0008187
High	[R].YDSDGDKSDDLVVDVSNEDPATPR.[V]	2xTMT6plex [N-Term; K7]; 1xPhospho [S8(100)]	767985169 1xPhospho [S255(100)]	0.00107085	0.000406115	1	22	1	767985169	767985169 [248-271]	1	3147.44	S8(Phospho): 100	53	58.4	58.5	64.5	58.1	49.6	53.6	54	66.1	70.5																53	Unique	2.99247	High	0.0004065	0.0007361
High	[K].FTGYQAIQQQSSSETEGEGGNTADASSEEEGDRVEEDGK.[G]	2xTMT6plex [N-Term; K39]; 2xPhospho [S26(99.9); S27(99.9)]	578827046 2xPhospho [S121(99.9); S122(99.9)]	0.000665843	0.000406115	1	2	6	578827046	578827046 [96-134]	1	4741	S26(Phospho): 89.45; S27(Phospho): 89.45	83.7	45	103.1	70.3	53.2	110.5	58.1	116.6	97.5	70.8																83.7	Unique	2.80611	High	0.0002194	0.0005183
High	[R].ETPQGELRPEVVEDEVPRSPVAEEPGGGGSSSSEAK.[L]	2xTMT6plex [N-Term; K36]; 1xPhospho [S30(96.8)]	24308303 1xPhospho [S30(99.9)]	0.000991798	0.000406115	1	1	2	24308303	24308303 [12-47]	1	4231.04	S30(Phospho): 96.82	127.7	95.8	152.8	83.8	93.6	133.1	94.5	126.9	110.5	104.3																127.7	Unique	4.09713	High	0.0004065	0.0007126
High	[R].TSPTVATQTGASATSTR.[G]	1xTMT6plex [N-Term]; 1xPhospho [S2(99.5)]		0.000657397	0.000406115	1	1	11	254910983	254910983 [105-121]	0	1945.94	S2(Phospho): 99.56	125.9	139.6	135.5	189.8	177.4	162.9	115.5	124.2	154.2	209.4	23.25	33.02	50.64	18.79	17.05	23.83	15.66	14.87	29.16	35.37				167	119.4		Unique	4.49301	High	0.0002786	0.0005807
High	[R].RPAEATSSPTSPERPR.[H]	1xTMT6plex [N-Term]; 2xPhospho [S8(100); S11(99.6)]	13236559 2xPhospho [S220(99.1); S/T]	0.000658706	0.000406115	1	1	9	13236559	13236559 [210-225]	0	2127.98	S7(Phospho): 99.47; S11(Phospho): 100	728.8	732.4	609.4	735.4	709.8	594.1	785.2	664.4	650.3	958.5																728.8	Unique	5.17971	High	0.0002786	0.0005567
High	[R].RSPSVSSPEPAEK.[S]	2xTMT6plex [N-Term; K13]; 1xPhospho [S2(100)]	118572613 1xPhospho [S1727(100)]	0.000711827	0.000406115	1	2	5	118572613	118572613 [1726-1738]	1	1908.98	S2(Phospho): 100	157.5	365.9	164.8	270.9	432.1	298.3	161.8	274.3	368.5	209.9	12.83	6.27	43.71	20.23	41.33	28.9	9.42	20.84	14.46	8.85				178.6	155.7		Unique	5.40388	High	0.0002784	0.00054
High	[R].SSGGGYSGDRSGGGYGGDR.[S]	1xTMT6plex [N-Term]; 1xPhospho [S11(100)]	21327701 1xPhospho [S442(100)]	0.000834341	0.000406115	1	4	1	21327701	21327701 [432-450]	1	2057.85	S11(Phospho): 100	119.7	226.9	230.1	147.1	178.9	171.9	170.9	170.3	205.4	181.6																119.7	Unique	3.03481	High	0.0003683	0.0006665
High	[R].YDSDGDKSDDLVVDVSNEDPATPR.[V]	2xTMT6plex [N-Term; K7]; 2xPhospho [S3(100); S8(100)]	767985169 2xPhospho [S250(100); S255(100)]	0.00103171	0.000406115	1	22	6	767985169	767985169 [248-271]	1	3227.41	S3(Phospho): 100; S8(Phospho): 100	408.1	99.1	479.9	317.1	186.4	508.8	364.8	417.9	473.4	437.4																408.1	Unique	3.82404	High	0.0004065	0.0007218
High	[K].EGAASPAPETPQPTSPETSPK.[E]	2xTMT6plex [N-Term; K21]; 2xPhospho [T14(100); S19(99.4)]	1034607183 2xPhospho [T385(100); S390(99.4)]	0.000841583	0.000406115	1	1	4	1034607183	1034607183 [372-392]	0	2697.25	T14(Phospho): 99.99; S19(Phospho): 99.4	92.2	47	61.4	73.9	66.9	92.1	75.9	64.6	64.6	136																92.2	Unique	3.57361	High	0.0004065	0.0006899
High	[R].VTSSVPLPSGSTSSPGR.[G]	1xTMT6plex [N-Term]; 1xPhospho [S/T]		0.000837047	0.000406115	1	5	27	7661890	7661890 [323-339]	0	1924.96	S14(Phospho): 99.57	600.2	485.4	438.1	438.1	756.8	636.2	426.2	479.5	717	589.2	37.37	34.82	32.35	60.45	36.37	47.14	57.41	43.88	3.92	26.25							Unique	4.05203	High	0.0003683	0.0006694
High	[K].AEGSSTASSGSQLAEGK.[G]	2xTMT6plex [N-Term; K17]; 2xPhospho [S8(100); S9(100)]		0.000766303	0.000406115	1	9	5	767956728	767956728 [531-547]	0	2184.98	S8(Phospho): 100; S9(Phospho): 100	561.8	1224.8	511.1	1236.9	1015.7	797	498.6	702.7	807.8	557.7																561.8	Unique	4.24756	High	0.0002786	0.0005988
High	[R].IDEDGENTQIEDTEPMSPVLNSK.[F]	2xTMT6plex [N-Term; K23]; 1xPhospho [S17(100)]	213972636 1xPhospho [S557(100)]	0.000890861	0.000406115	1	5	1	213972636	213972636 [541-563]	0	3099.45	S17(Phospho): 100	135.9	74.8	87.1	78	60.4	116.6	34.5	157.4	80.7	124.7																	Unique	3.04492	High	0.0004065	0.0007033
High	[R].TPAAPASPAAVPSEGSGGSTTGWR.[A]	1xTMT6plex [N-Term]; 1xPhospho [S7(100)]	21735415 1xPhospho [S156(100)]	0.000618134	0.000406115	1	1	2	21735415	21735415 [150-173]	0	2521.19	S7(Phospho): 100	175	134.9	213.4	136.7	182.4	258.1	145.6	178.2	254.5	191.7																175	Unique	4.69436	High	0.0002194	0.0005122
High	[K].AEDGATPSPSNETPKKK.[K]	4xTMT6plex [N-Term; K15; K16; K17]; 1xPhospho [S/T]		0.00101277	0.000406115	1	1	7	153070260	153070260 [138-154]	2	2753.49	T13(Phospho): 99.66	105.7	207.6	184.2	275.7	181.5	170.2	451.2	134.9	284	156.9	1.19	29.18	16.13	20.84	25.29	41.1	2.97	41.35	27.08	49.66				104.8	106.6		Unique	3.25624	High	0.0004065	0.0007168
High	[K].TRSQEQEVLER.[G]	1xTMT6plex [N-Term]; 1xPhospho [S3(100)]	259906018 1xPhospho [S328(100)]	0.000918659	0.000406115	1	7	2	259906018	259906018 [326-336]	1	1683.83	S3(Phospho): 100	152.8	67.1	228.4	187.7	71.8	120	466	112.7	91.1	174	28.25	41.01	22.8	27.54	70.86	33.43	32	64.68	9.67	51.71				122.3	183.4		Unique	4.25865	High	0.0004065	0.000707
High	[K].DTPDSLSPETYGNFDSQSR.[R]	1xTMT6plex [N-Term]; 1xPhospho [S5(99.3)]	154354985 1xPhospho [S161(100)]	0.00089463	0.000406115	1	7	5	154354985	154354985 [157-175]	0	2425.04	S7(Phospho): 99.62	89.4	94.9	74.2	46.1	158	61.4	61.6	50.4	55.5	73.1																89.4	Unique	3.71581	High	0.0004065	0.000704
High	[R].KPSPAASPATK.[K]	3xTMT6plex [N-Term; K1; K11]; 1xPhospho [S3(100)]	768026182 1xPhospho [S697(100)]	0.0011743	0.000406115	1	8	3	768026182	768026182 [695-705]	0	1822.04	S3(Phospho): 100	189.2	531.6	518.5	232.9	292.3	316.5	497.3	214.1	307.6	371.4	29.84	58.21	76.19	62.84	53.74	70.57	72.32	58.88	66.85	54.56				229.1	149.3		Unique	3.31282	High	0.0004065	0.0007817
High	[R].QAQSPAGVSSEVEVLK.[A]	2xTMT6plex [N-Term; K16]; 1xPhospho [S4(100)]	578821804 1xPhospho [S150(100)]	0.000926661	0.000406115	1	18	1	578821804	578821804 [147-162]	0	2167.14	S4(Phospho): 100	53.4	68.4	74.7	42.3	83.9	84.4	64.9	53.7	56.8	113.3																53.4	Unique	3.3227	High	0.0004065	0.0007074
High	[R].APQTSSSPPPVR.[R]	1xTMT6plex [N-Term]; 1xPhospho [S7(100)]		0.000922316	0.000406115	1	32	122	1034554585	1034554585 [729-740]	0	1532.77	S7(Phospho): 100	1259.8	835.6	1224.6	1534.7	980.3	1237.6	779.7	1425	1476.6	1176.8	104.99	101.35	103.75	116.07	97.03	120.49	102.13	130.19	122.66	94.43				2500.5	2827.4	72.8	Unique	4.11855	High	0.0004065	0.0007154
High	[R].ASPGGVSTSSSDGK.[A]	2xTMT6plex [N-Term; K14]; 1xPhospho [S2(100)]	55750053 1xPhospho [S34(100)]	0.00111371	0.000406115	1	1	4	55750053	55750053 [33-46]	0	1774.86	S2(Phospho): 100	118.1	376.6	215.9	184.7	426.5	210.8	208.8	186.5	474.5	164.2	72.48	86.13	90.2	67.1	96.69	58.45	81.45	77.57	93.44	68.94				178.6	57.6		Unique	3.41735	High	0.0004065	0.0007549
High	[K].EELQANGSAPAADKEEPAAAGSGAASPSAAEK.[G]	3xTMT6plex [N-Term; K14; K32]; 1xPhospho [S26(100)]		0.00076245	0.000406115	1	1	8	153070260	153070260 [56-87]	1	3749.85	S26(Phospho): 100	98.1	114.6	320.4	104.3	154.6	288.6	364.8	219.3	150.3	78.3		95.39	47.11	87.82	85.17	91.04	47.21	80.4	24	15.41							Unique	3.65267	High	0.0002786	0.0005827
High	[R].KGSITEYTAAEEK.[E]	3xTMT6plex [N-Term; K1; K13]; 1xPhospho [S3(100)]	1002623433 1xPhospho [S235(100)]	0.000898461	0.000406115	1	3	3	1002623433	1002623433 [233-245]	1	2194.16	S3(Phospho): 100	217.7	346.8	208.1	189.2	279.1	131.1	285.7	190.6	138.6	136.7	17.85	13.3	14.13	25.43	3.71	6.15	19.62	16.89	16.61	2.31				190.3	245.2		Unique	3.685	High	0.0004065	0.0007107
High	[R].SWSSTPTAGGIEGSVK.[L]	2xTMT6plex [N-Term; K16]; 1xPhospho [S3(99.8)]	1034616667 1xPhospho [S609(99.8)]	0.00108967	0.000406115	1	2	2	1034616667	1034616667 [607-622]	0	2102.06	S3(Phospho): 99.78																											No Quan Values	3.54438	High	0.0004065	0.0007439
High	[K].AIEQADLLQEEDESPR.[S]	1xTMT6plex [N-Term]; 1xPhospho [S14(100)]	4557471 1xPhospho [S147(100)]	0.000905751	0.000406115	1	1	2	4557471	4557471 [134-149]	0	2152	S14(Phospho): 100	80.9	47.7	54.8	61.6	71.6	99.6	50.4	73.1	103.5	102.9																80.9	Unique	3.42102	High	0.0004065	0.0007058
High	[R].AGSSTPGDAPPAVAEVQGR.[S]	1xTMT6plex [N-Term]; 1xPhospho [S3(99.7)]	1034673276 1xPhospho [S3014(99.7)]	0.000589205	0.000406115	1	13	20	1034673276	1034673276 [3012-3030]	0	2076	S3(Phospho): 99.69	419.8	619.3	485.7	327.4	727.9	641.9	315.4	561	775.1	430.2	62.59	33.74	21.4	37.09	10.76	21.12	31.44	12.33	18.75	35.8							Unique	4.36702	High	0.0002194	0.0005025
High	[R].DRSPAPSPVLPSSSLR.[N]	1xTMT6plex [N-Term]; 1xPhospho [S3(100)]	767939561 1xPhospho [S1457(100)]	0.00120732	0.000406115	1	9	4	767939561	767939561 [1455-1470]	1	1975.02	S3(Phospho): 100	277.5	181.9	172.3	216.1	181.2	292.6	247.1	168.3	211.1	216.8	31.72	31.75	45.17	55.57	45.42	50.73	64.22	22.15	44.3	57.13							Unique	3.11653	High	0.0004065	0.0007949
High	[R].RDSIVAELDR.[E]	1xTMT6plex [N-Term]; 1xPhospho [S3(100)]	768000711 1xPhospho [S99(100)]	0.00113834	0.000406115	1	4	4	768000711	768000711 [97-106]	1	1482.75	S3(Phospho): 100	83.5	119.3	53.1	121.4	140.4	112.6	29.2	76.2	78.6	117.1	0.74	6.55		5.08	19.73	74.85			7.43	31.67							Unique	3.13989	High	0.0004065	0.0007898
High	[R].YNDWSDDDDDSNESK.[S]	2xTMT6plex [N-Term; K15]; 1xPhospho [S5(100)]	530422070 1xPhospho [S61(100)]	0.000655428	0.000406115	1	1	4	530422070	530422070 [57-71]	0	2342.93	S5(Phospho): 100	1007.3	1014.8	1048.9	472.9	2966.3	899.7	893.9	825	672.1	833.7																1007.3	Unique	4.31422	High	0.0002194	0.0005146
High	[K].RLSGSSEDEEDSGKGEPTAK.[G]	3xTMT6plex [N-Term; K14; K20]; 1xPhospho [S3(100)]	21396500 1xPhospho [S330(100)]	0.000614648	0.000406115	1	1	6	21396500	21396500 [328-347]	2	2846.4	S3(Phospho): 100	634.3	742.6	876.7	1043.1	688.6	922.7	344.4	1778.1	976.3	801.2	5.95	21.77	22.57	31.22	14.27	18.7	7.85	15.79	23.96	13.15				607.7	661		Unique	4.79797	High	0.0002786	0.0005454
High	[R].RSSDEDAAGEPK.[A]	2xTMT6plex [N-Term; K12]; 1xPhospho [S3(99.8)]	742800211 1xPhospho [S218(99.8)]	0.000759044	0.000406115	1	4	3	742800211	742800211 [216-227]	1	1799.86	S3(Phospho): 99.77	212.8	189	101.4	208.2	233.1	217.8	131.5	285.9	207.3	177.1																212.8	Unique	4.71448	High	0.0002786	0.0005791
High	[R].MGGAGGEGSDDDTSLT.[-]	1xTMT6plex [N-Term]; 1xPhospho [S9(100)]	116812600 1xPhospho [S284(100)]	0.000838857	0.000406115	1	1	4	116812600	116812600 [276-291]	0	1778.7	S9(Phospho): 100	125.3	99.4	193.8	240.5	119.3	194.5	300.1	139.9	178.5	343.2																125.3	Unique	3.49778	High	0.0004065	0.0007262
High	[R].SVSSNVASVSPIPAGSK.[K]	2xTMT6plex [N-Term; K17]; 1xPhospho [S10(99.5)]	166795297 1xPhospho [S421(99.5)]	0.000556787	0.000406115	1	1	2	166795297	166795297 [412-428]	0	2125.13	S10(Phospho): 99.54	158.4	214.3	247.7	133.1	216.4	163.5	929.5	122	166.5	304.7																158.4	Unique	4.08171	High	0.0002194	0.0004858
High	[R].EAARSPDKPGGSPSASR.[R]	2xTMT6plex [N-Term; K8]; 2xPhospho [S5(100); S]	157694511 2xPhospho [S49(100); S56(98.4)]	0.000990963	0.000406115	1	1	6	157694511	157694511 [45-61]	1	2288.08	S5(Phospho): 100; S12(Phospho): 98.59	902.1	5255.8	1578.7	5017.9	2955.9	2309.8	3922.3	4246.8	4023.1	4963	27.22	18.6	1.3	9.63	28.35	30.79	8.32	5.96	22.02	21.24							Unique	3.55038	High	0.0004065	0.0007668
High	[R].QAEATRASPPRSPAEPK.[G]	2xTMT6plex [N-Term; K17]; 2xPhospho [S12(100); S/T]	256574805 2xPhospho [S275(99.4); S279(100)]	0.00118553	0.000406115	1	1	6	256574805	256574805 [268-284]	2	2411.19	S8(Phospho): 99.25; S12(Phospho): 100	338.5	3077.5	1401.9	490	1034	744.2	1229.3	177.8	252.6	1443.3		13.36	29.53	15.71	4.98	7.8	2.98			8.29							Unique	2.58611	High	0.0005645	0.000892
High	[R].KHSPSPPPPTPTESR.[K]	2xTMT6plex [N-Term; K1]; 2xPhospho [S3(100); S5(100)]	188536047 2xPhospho [S328(100); S330(100)]	0.000700901	0.000406115	1	2	85	188536047	188536047 [326-340]	1	2233.08	S3(Phospho): 100; S5(Phospho): 100	8434.8	27880.4	24435	52069.4	37039.4	18515.8	29423.9	27246.3	18554.4	22523.3	9.04	3.56	9.7	3.31	4.79	6.59	11.44	3.96	4.34	19.14							Unique	4.56194	High	0.0002784	0.0005347
High	[R].STSATDTHHVEMAR.[E]	1xTMT6plex [N-Term]; 1xOxidation [M12(100)]; 1xPhospho [S1(100)]	171906589 1xPhospho [S31(100)]	0.000778104	0.000406115	1	4	2	171906589	171906589 [31-44]	0	1867.82	S1(Phospho): 100; M12(Oxidation): 100	119.7	109	59.1	99.3	116.2	106	100.1	101.1	146.5	105.4	4.38	2.58	24.14	1.93	3.17	19.27	23.2	28.13	40.91	7.52							Unique	4.29924	High	0.0002786	0.0006001
High	[R].RASISEPSDTDPEPR.[T]	1xTMT6plex [N-Term]; 1xPhospho [S3(100)]	806638628 1xPhospho [S387(100)]	0.000749128	0.000406115	1	5	6	806638628	806638628 [385-399]	1	1965.91	S3(Phospho): 100	160.2	304	662.6	209	390.9	291.7	185.5	250.6	392.4	160.3	5.93	14.56	32.02	15.44	16.3	34.91	6.16	11.46	18.66	4.69				167	153.5		Unique	4.61221	High	0.0002786	0.0005693
High	[R].SRTPPSAPSQSR.[M]	1xTMT6plex [N-Term]; 1xPhospho [T/S]	118572613 1xPhospho [T2409(99.4)]	0.000934968	0.000406115	1	2	5	118572613	118572613 [2407-2418]	1	1579.78	T3(Phospho): 99.52	55.7	354.1	164.6	188.3	360	103.6	106.8	157	128.5	177		129.46	99.82	112.1	116.62	97.28	87.09	110.95	98.5	100.79		55.7					Unique	3.71208	High	0.0004065	0.0007078
High	[R].DGYGGSRDSYSSSR.[S]	1xTMT6plex [N-Term]; 1xPhospho [S9(99.5)]	56699409 1xPhospho [S326(99.5)]	0.0010619	0.000406115	1	2	1	56699409	56699409 [318-331]	1	1802.75	S9(Phospho): 99.51	89.4	171.6	151.7	166.9	223.6	152	166.9	124.7	138	105.7																89.4	Unique	3.13883	High	0.0004065	0.0007321
High	[R].VSPPQPPPPQPPR.[K]	1xTMT6plex [N-Term]; 1xPhospho [S2(100)]	295842330 1xPhospho [S112(100)]	0.000804018	0.000406115	1	1	7	295842330	295842330 [111-123]	0	1702.89	S2(Phospho): 100	462.7	416.4	278.2	355.7	468.4	423.7	262.5	400.5	491	453.9	52.59	23.25	18.28	33.58	24.49	37.03	27.87	31.23	82.43	34.72							Unique	3.65145	High	0.0002786	0.0006311
High	[K].KETQSPEQVK.[S]	3xTMT6plex [N-Term; K1; K10]; 1xPhospho [S5(100)]	7661958 1xPhospho [S496(99.6)]	0.000967935	0.000406115	1	4	26	7661958	7661958 [492-501]	1	1941.07	S5(Phospho): 100	4214.9	3170.7	5514.6	6143.5	2976.5	4194.8	3383.4	7557.4	5581.4	3846.1	0.13	7.02	3.8	4.01	7.49	2.49	6.06	4.85	0.48	5.81				4218.7	4211.2		Unique	4.10575	High	0.0005057	0.0008434
High	[R].QGSGRESPSLASR.[E]	1xTMT6plex [N-Term]; 1xPhospho [S12(94.6)]	530407503 1xPhospho [S339(100)]	0.00119045	0.000406115	1	25	2	530407503	530407503 [333-345]	1	1640.8	S7(Phospho): 100	102.2	377.5	71.6	66.2	697.8	139.2	168.2	121.7	116.3	224.5		22.63	36.49	53.11	16.08	30.98	25.48	17.44	1.92	17.57							Unique	3.34376	High	0.0004065	0.0008021
High	[R].GPVSGTEPEPVYSMEAADYR.[E]	1xTMT6plex [N-Term]; 1xOxidation [M14(100)]; 1xPhospho [S13(100)]	20357552 1xPhospho [S447(100)]	0.000829406	0.000406115	1	4	2	20357552	20357552 [435-454]	0	2480.09	S13(Phospho): 100; M14(Oxidation): 100	177.8	188.5	183.2	178.7	200.9	212.2	190.2	175.7	194.6	302.2																177.8	Unique	3.19945	High	0.0003683	0.0006614
High	[K].YVDEENSDGETSNHR.[L]	1xTMT6plex [N-Term]; 1xPhospho [S7(100)]	145580615 1xPhospho [S142(100)]	0.000921702	0.000406115	1	2	4	145580615	145580615 [136-150]	0	2060.84	S7(Phospho): 100	160.5	120.9	96.3	157.5	160	141.5		129.4	163.8	48.6		46.34	67.61	20.41	14.44	36.08		53.97	37.15								Unique	2.34607	High	0.0004065	0.0007085
High	[K].GWLRDPSASPGDAGEQAIR.[Q]	1xTMT6plex [N-Term]; 1xPhospho [S9(100)]	7669550 1xPhospho [S290(100)]	0.000829406	0.000406115	1	2	1	7669550	7669550 [282-300]	1	2292.1	S9(Phospho): 100	88.9	206.6	130.7	141.8	169.7	201	127.5	143.9	152.8	237.8																88.9	Unique	4.28	High	0.0003683	0.0006613
High	[R].KHSPSPPPPTPTESR.[K]	2xTMT6plex [N-Term; K1]; 1xPhospho [S3(100)]	188536047 1xPhospho [S328(100)]	0.000840673	0.000406115	1	2	3	188536047	188536047 [326-340]	1	2153.12	S3(Phospho): 100	216.1	230	267.1	228.9	249.3	162.6	187.9	212.5	217.4	173.7																216.1	Unique	3.93648	High	0.0003683	0.0006729
High	[K].VEENPDADSDFDAK.[S]	2xTMT6plex [N-Term; K14]; 1xPhospho [S9(100)]	1034601657 1xPhospho [S278(100)]	0.000885578	0.000406115	1	4	2	1034601657	1034601657 [270-283]	0	2089.94	S9(Phospho): 100	476.2	500.3	628.2	501.1	455.7	536.4	347.2	630.7	677	384.8																476.2	Unique	3.70355	High	0.0004065	0.0007018
High	[R].GPSPSPVGSPASVAQSR.[S]	1xTMT6plex [N-Term]; 1xPhospho [S3(99.5)]	21264565 1xPhospho [S696(99.5)]	0.000774365	0.000406115	1	2	2	21264565	21264565 [694-710]	0	1889.93	S3(Phospho): 99.52	231.3	315.8	336.4	275.8	346.1	158.5	241.3	160.3	243.1	281.6																231.3	Unique	4.08056	High	0.0002786	0.0005955
High	[R].SPEASQTDSPVESPR.[L]	1xTMT6plex [N-Term]; 1xPhospho [S9(100)]	389565501 1xPhospho [S336(100)]	0.00084478	0.000406115	1	2	4	389565501	389565501 [328-342]	0	1895.86	S9(Phospho): 100	107.6	159.2	171.2	63.6	329.8	142.4	69.9	138.9	149.3	187.8	60.15	22.68	9.29	14.49	16.57	10.26	6.41	12.93	12.18	24.84				153.4	61.8		Unique	3.63298	High	0.0004065	0.0006772
High	[R].TAFYNEDDSEEEQR.[Q]	1xTMT6plex [N-Term]; 1xPhospho [Y/S/T]	34996489 1xPhospho [S1783(100)]	0.000985194	0.000406115	1	4	16	34996489	34996489 [1775-1788]	0	2041.82	S9(Phospho): 100	656.9	498.4	624.1	606.7	632.5	521.7	329.5	750.9	537.3	667.2	21.16	27.46	10.45	10.2	22.24	27.9	6.53	6.76	7.48	10.03							Unique	3.04175	High	0.0004065	0.0007116
High	[R].QSGTPPGMGAPGVPGAAGVGGAGGR.[E]	1xTMT6plex [N-Term]; 1xOxidation [M8(100)]; 1xPhospho [S/T]	767999054 1xPhospho [T143(99.1)]	0.000619524	0.000406115	1	8	8	767999054	767999054 [140-164]	0	2388.13	T4(Phospho): 99.14; M8(Oxidation): 100	132.5	206.1	470.8	375.1	208.7	282.7	194.7	404	288.7	393.4		49.84	39.94		42.52	5.27	47.6		14.45	15.93							Unique	3.61755	High	0.0002194	0.0005034
High	[R].TTEPEQSHSNTSTLTER.[E]	1xTMT6plex [N-Term]; 1xPhospho [S9(100)]	578825674 1xPhospho [S368(100)]	0.000992637	0.000406115	1	15	2	578825674	578825674 [360-376]	0	2227.01	S9(Phospho): 100		97.9	80.1	53.2	101.3	96	79.2	60.9	157.3	42		12.82	18.73	18.2	0.6	6.43	1.67	47.72	2.2	13.26							Unique	3.20553	High	0.0004065	0.0007127
High	[R].LGAGGGSPEKSPSAQELK.[E]	3xTMT6plex [N-Term; K10; K18]; 1xPhospho [S7(100)]	56181387 1xPhospho [S19(100)]	0.000676023	0.000406115	1	1	10	56181387	56181387 [13-30]	1	2480.34	S7(Phospho): 100	1933.5	899.6	990.2	3939.2	1045.9	1840.7	653	1533.9	1251.2	1304.3	14.42	0.7	3.35	3.08	10.79	3.14	1.59	6.42	14.92	9.63							Unique	3.57455	High	0.0002194	0.0005222
High	[R].QYDPPAESQQSESPPRR.[D]	1xTMT6plex [N-Term]; 1xPhospho [S/Y]		0.000642785	0.000406115	1	1	6	91825557	91825557 [155-171]	1	2281.04	S13(Phospho): 100	108.3	242.6	101.1	278.2	55.9	154.2	205.2	81	250.6	72.8																108.3	Unique	4.61104	High	0.0002194	0.0005103
High	[R].AIGGGLSSVGGGSSTIK.[Y]	2xTMT6plex [N-Term; K17]; 2xPhospho [S/T]		0.000779499	0.000406115	2	2	21	5031839; 155969697	5031839 [534-550]; 155969697 [534-550]	0	2066.03	S8(Phospho): 99.29; S13(Phospho): 99.28	257.1	533.1	331.9	521.7	341.4	561.5	1395.5	437.1	399.7	579.7	0.48	13.42	11.04	19.24	10.05	2.18	14.11	1.65	10.75	29.8				256.3	258		Not Unique	3.18411	High	0.0003683	0.0006717
High	[R].AMDNHSDSEEELAAFCPQLDDSTVAR.[E]	1xTMT6plex [N-Term]; 1xCarbamidomethyl [C16]; 2xPhospho [S6(100); S8(100)]	30023820 2xPhospho [S258(100); S260(100)]	0.000623682	0.000406115	1	2	1	30023820	30023820 [253-278]	0	3297.33	S6(Phospho): 100; S8(Phospho): 100	100.7	53.4	98.6	74.9	84.4	84.7	79.7	81	78.9	106.8																100.7	Unique	4.41611	High	0.0002194	0.0005046
High	[K].EQTVSETLGPGGEAVR.[S]	1xTMT6plex [N-Term]; 1xPhospho [S5(100)]	1034659998 1xPhospho [S917(100)]	0.000704391	0.000406115	1	6	4	1034659998	1034659998 [913-928]	0	1938.94	S5(Phospho): 100	302.7	191.1	158.5	290.3	182.9	248.8	154.3	163.3	165.2	218.1																302.7	Unique	4.54565	High	0.0002786	0.0005633
High	[R].AQHLSPAPGLAQPAAPAQASAAIPAAGK.[A]	2xTMT6plex [N-Term; K28]; 1xPhospho [S5(100)]	578801475 1xPhospho [S385(100)]	0.000618829	0.000406115	1	2	2	578801475	578801475 [381-408]	0	3100.67	S5(Phospho): 100	370	245.2	144.3	113.5	100.1	100.6	281.2		97.8	103.4	17.3	17.04	26.89	18.3	29.58	15.01	18.58		15.79	8.89							Unique	4.13916	High	0.0002194	0.0005032
High	[R].RDSQDGSSYR.[R]	1xTMT6plex [N-Term]; 1xPhospho [S3(100)]	5453710 1xPhospho [S146(100)]	0.00112171	0.000406115	1	2	30	5453710	5453710 [144-153]	1	1479.64	S3(Phospho): 100	641.6	1202.6	444.4	611.4	1386.2	823.1	1038.4	866.9	961.4	549.7	42.66	75.9	80.55	33.71	41.51	76.04	66.79	5.9	79.2	37.33				712.5	976.6		Unique	4.04339	High	0.0004792	0.0008224
High	[K].EDTDHEEKASNEDVTK.[A]	3xTMT6plex [N-Term; K8; K16]; 1xPhospho [S10(100)]	19923653 1xPhospho [S129(100)]	0.000642785	0.000406115	1	4	2	19923653	19923653 [120-135]	1	2614.25	S10(Phospho): 100	588.3	415.7	430.1	384.9	479.4	587.6	286.4	877.5	480.4	299.3																588.3	Unique	4.20746	High	0.0002194	0.0005104
High	[K].RRPSGSEQSDNESVQSGR.[S]	1xTMT6plex [N-Term]; 1xPhospho [S4(100)]	7661950 1xPhospho [S1097(100)]	0.000558962	0.000406115	1	1	11	7661950	7661950 [1094-1111]	1	2285.05	S4(Phospho): 100	51.2	268.4	287.7	385	161.9	283.2	224	342.5	319	38.5		28.87	57.89	49.67	5.96	12.08	58.89	72.92	8.09	31.69					51.2		Unique	4.56066	High	0.0002194	0.0004864
High	[R].DEEQSEADAGSGPPTPGPTTLGPK.[K]	2xTMT6plex [N-Term; K24]; 2xPhospho [S11(98.1); T15(98.1)]	146219843 2xPhospho [S568(98.1); T572(98.1)]	0.000818263	0.000406115	1	1	1	146219843	146219843 [558-581]	0	2956.33	S11(Phospho): 98.06; T15(Phospho): 98.06	44.9	50.8	61.7	43.7	51.7	57.1	45.6	61.9	62.5	90.2																44.9	Unique	3.34084	High	0.0002786	0.0006487
[truncated: 4,372 more rows]

## Sheet: S3
Supplementary table 3: Quantified phosphopepetides in CCRT resistant cervical cancer patients
[truncated: 2,532 more rows]

[truncated: 3 more sheets: S4, S5, S6]
